# Supplementary material
Source: PubMed Central journal article supplement (PMC8255998)
Supplement: pnas.2024502118.sapp.pdf [file pnas.2024502118.sapp.pdf]

## *Supporting Information*

### **Reduced levels of Prostaglandin I2 Synthase specify the cancer-free trichothiodystrophy**

Anita Lombardi et al.

#### **MATERIALS AND METHODS**

**Cell Culture Conditions.** Primary cultures of dermal fibroblasts were established from biopsies taken from sun-unexposed areas of the skin. These samples were de-identified prior to use in this study. Mouse embryonic fibroblasts were isolated from the WT and TTD mouse line XPD<sup>R722W</sup>, which share identical genetic background (100% C57BL/6). Cells were routinely cultured at 37° C in a humidified atmosphere conditioned with 5% CO<sub>2</sub>. Fibroblasts were grown in a 1:1 mixture of HAM's F-10 (EuroClone) and DMEM (EuroClone) supplemented with 10% FBS (Australian Origin, Lonza), 2 mM L-glutamine (EuroClone), 100 U/mL of Penicillin, and 0.1 mg/mL of Streptomycin (EuroClone).

For UV treatment, fibroblasts were cultured under standard conditions, rinsed in phosphate buffered saline (PBS), exposed to a UV-C dose of 10 J/m<sup>2</sup> using a UV Stratalinger and subsequently recovered in fresh culture medium for 2hrs inside the incubator at 37°C with 5% CO<sub>2</sub>. Untreated cells were processed in parallel.

#### **cDNA Preparation and Library Preparation for Next-Generation Sequencing.**

As first step, 2x10<sup>6</sup> primary dermal fibroblasts were cultured under standard conditions, rinsed in fresh PBS and purified using the RNeasy Mini Kit (Qiagen) according to manufacturer's instructions. Trace DNA was removed by DNase treatment using the Turbo DNA-free kit (Ambion, Applied Biosystems), according to manufacturer's instructions. RNA was quantified using the Nanodrop 1000

Spectrophotometer (Thermo Scientific) and RNA quality was evaluated by looking the 18S/28S RNA ratio following agarose gel electrophoresis. 4 µg of RNAs were sent to Instituto di Genomica Applicata (IGA) for sequencing and RNAseq processing. Briefly, total RNAs were subjected to polyA+ fraction selection and transformed in a cDNA library for next-generation sequencing by the use of the TruSeq RNA Sample Prep kit (Illumina) according to manufacturer's protocol. A total of 60 million sequence reads were obtained for each cell line in three biological replicates, using 2 × 100 bp paired end reads on an Illumina HiSeq2500 instrument (60 million reads / replicate).

**Processing of mRNA Sequencing Data.** Raw reads were subjected to standard quality control procedures with the NGSQC-toolkit software and aligned to the human genome reference sequence (NCBI37/hg19) by the TopHat alignment software (1). The resulting SAM files were sorted and converted to BAM files using SAMtools (version 1.7). Genes were annotated and quantified according to the TopHat-Cufflinks protocol and differential gene expression analysis was performed by CuffDiff (2) using default parameters. Differentially expressed genes were selected based on a adjusted p-value < 0.05 threshold.

The most deregulated subset of genes was deeply analysed through the Integrative Genomic Viewer (IGV), a high-performance visualization tool for interactive exploration of datasets, including RNA-seq aligned sequence reads. All Gene Ontology (GO) analyses were performed with DAVID and REVIGO Bioinformatics tools (<https://david.ncifcrf.gov/>; <http://revigo.irb.hr/>), and only Biological Process terms were kept for downstream analyses.

**RealTime Ready Custom Panel and Quantitative Real-Time RT-PCR.** RNA extraction and DNase treatment were performed using the RNeasy Purification Kit (Qiagen) and Turbo DNA-free kit (Ambion, Applied Biosystems), respectively, according to the manufacturer's instructions. RNA

pools were obtained by mixing equal amounts of RNA from the fibroblasts of either 4 TTD patients reported in Suppl Table S7 (TTD pool) or 4 healthy individuals (parents of TTD7PV and TTD12PV/TTD15PV). One microgram of each RNA pool was reverse-transcribed using the iScript cDNA Synthesis kit (Bio-Rad). The cDNAs were diluted 1:25 in water and 5- $\mu$ L aliquots were used as template in real-time PCR reactions in 96-well format RealTime ready Custom Panels (Roche). Each gene assay contained 0.4  $\mu$ M of gene specific primers and 0.2  $\mu$ M of a Universal ProbeLibrary. The primers were directed to amplify the 174 target genes identified by the RNAseq analysis (see list in Suppl Table S6) and the three reference genes (*G6PD*, *GAPDH*, and *YWHAZ*). The amplification efficiency of each reaction was  $2.0 \pm 0.2$  and the cycle threshold (Ct) of each transcript was automatically given by the LightCycler480 software package (Roche). The expression analysis of each gene in TTD and normal pools was done in triplicate. Quality of the data and quantifications were computed by applying the Relative Quantification Analysis using the  $2^{-\Delta\Delta C_t}$  method (3). The fold change (FC) of target genes in TTD was calculated by normalizing each Ct value to the geometric mean of the three reference genes (*G6PD*, *GAPDH* and *YWHAZ*) and to the mean value of the corresponding gene in the control sample. The fold-change in the TTD pool was calculated as  $2^{-(\Delta C_t \text{ patients} - \Delta C_t \text{ normal})}$  by using the  $2^{-\Delta\Delta C_t}$  method. By using this approach, the absence of variation is equivalent to 1. For transcript analysis in individual cell strains, 2  $\mu$ g of RNA was reverse-transcribed in a single RT reaction using the iScript Reverse Transcriptase kit (Bio-Rad). The cDNAs were diluted 1:10 in water and 4  $\mu$ L were used as template in real-time PCR reactions containing 10 pmol of each forward and reverse primers (provided by Roche). The real-time reactions were performed using the LightCycler 480 Real-Time PCR System (Roche). Standard curves were obtained for each primer set with serial dilutions of cDNA and the relative amount of each mRNA was normalized to the relative amount of the housekeeping gene *GAPDH*.

### **Reduced transcriptional machinery occupancy on *PTGIS* promoter in PS-TTD skin fibroblasts**

Chromatin immunoprecipitation (ChIP) analysis has been applied to investigate the mechanistic failure of *PTGIS* promoter in PS-TTD cells. TFIID and the hypophosphorylated form of RNAP II (RNAP IIA) are two essential elements of the transcription preinitiation complex (PIC) that assembles on active gene promoters. Thus, antibodies directed against the XPB subunit of the TFIID complex or against RNAP IIA were used to immunoprecipitate the chromatin of primary dermal fibroblasts from PS-TTD, XP or healthy individuals. The PCR amplification of co-immunoprecipitated genomic DNA fragment spanning the 5' region of *PTGIS* transcript allowed the detection of the transcription machinery occupancy on this gene. As shown in Fig. 5, very low levels of RNAP II and TFIID were observed in PS-TTD compared to control cells, indicating that TTD-specific alterations impact on the recruitment of the transcription apparatus on *PTGIS* promoter.

**Immunoblot Analysis.** Immunoblot analyses were performed according to standard protocols (4) using primary antibodies raised against ANGPTL-4 (Ab115798, Abcam), c-Jun (sc-1694, Santa Cruz Biotechnology), CLU (sc-166907, Santa Cruz Biotechnology), EGR1 (sc-101033, Santa Cruz Biotechnology), GADD45A (sc-796, Santa Cruz Biotechnology), GADD45B (sc-377311, Santa Cruz Biotechnology), ID1 (sc-133104, Santa Cruz Biotechnology) ID3 (sc56712, Santa Cruz Biotechnology), IER3 (ab65152, Abcam), IL20RB (Ab169620, Abcam), JunD (sc-271938, Santa Cruz Biotechnology), *PTGIS* (Ab72952, Abcam), WISP2 (Ab38317, Abcam), WNT-4 (Ab169592, Abcam), and  $\gamma$ -tubulin (Sigma).

Proteins were extracted from skin tissue samples derived from WT and TTD females XPD<sup>R722W</sup> mice by homogenizing the tissue with an electric homogenizer (ULTRATURREX T25) in lysis buffer (RIPA) containing protease inhibitor cocktail (PIC). The homogenate is spun at 12,000 g for 20 min at 4°C, the supernatant collected and processed for immunoblot analysis.

## Statistical analysis.

All experiments were independently repeated at least three times. Quantitative data are presented as means  $\pm$  SEM. The p values were calculated for each sample using paired two-tailed t test. We assigned \* (p value < 0.05), \*\* (p value < 0.01) \*\*\* (p value < 0,001) in all Chip and RealTime RT-PCR experiments. The absence of \*, \*\* or \*\*\* means that the respective measurement is not significantly different to t = 0.

## REFERENCES

1. Trapnell C, Pachter L, Salzberg SL (2009) TopHat: discovering splice junctions with RNA-Seq. *Bioinformatics* 25(9):1105–1111.
2. Trapnell C, et al. (2012) Differential gene and transcript expression analysis of RNA-seq experiments with TopHat and Cufflinks. *Nat Protoc* 7(3):562–578.
3. Livak KJ, Schmittgen TD (2001) Analysis of relative gene expression data using real-time quantitative PCR and the 2(-Delta Delta C(T)) Method. *Methods* 25(4):402–408.
4. Orioli D, et al. (2006) Rac3-induced neuritogenesis requires binding to Neurabin I. *Mol Biol Cell* 17(5):2391–2400.

## LEGENDS

**Fig. S1** Functional annotation clustering of the transcriptionally altered genes in TTD7PV fibroblasts. Schematic representation of the Gene Ontology (GO) biological processes enrichment of the transcriptionally deregulated genes in TTD cells in basal condition (A) or after UV-irradiation (B) obtained by sequentially using the DAVID and REVIGO bioinformatics tools. The top enriched pathways ( $FDR \leq 0.05$ ) are indicated based on their p values ( $P \leq 0.05$ ).

**Fig. S2** Gene expression analysis of the UV-responsive genes by real time RT-PCR. The graph indicates the transcription levels of *EGR1*, *ID3*, *c-Jun*, *IER3*, *ANGPTL4*, *GADD45B* and *GADD45A* genes in fibroblasts from the healthy control (CTR), parents of TTD12PV-15PV, TTD11PV and TTD7PV (*black bars*), from the TTD/XP-D patients TTD12PV, TTD15PV, TTD11PV, TTD7PV, TTD23PV, TTD20PV, TTD8PV (*red bars*) and from the XP/XP-D patients XP15PV, XP-16PV, XP17PV, XP49BR and XP1BR (*blue bars*) cultured under basal condition (NT, *solid bars*) and after UV irradiation (UV, *empty bars*). The expression level of each gene was normalized to the corresponding expression level of the *GAPDH* housekeeping gene and then to the expression level of the internal control sample TTD12-15PVfather. The reported values represent the means of at least two independent experiments, whose samples have been analyzed in triplicate. Bars indicate the standard errors. M: mother, F: father. Test of significance between the different groups are reported in Fig. 2A.

**Fig. S3** Gene expression analysis of the UV-responsive genes by real time RT-PCR. The graph indicates the transcription levels of *IL20RB*, *PTGIS*, *JunD*, *CLU*, *WISP2*, *WNT4* and *ID1* genes in fibroblasts from the healthy control (CTR) parents of TTD12PV-15PV, TTD11PV and TTD7PV (*black bars*), from the TTD/XP-D patients TTD12PV, TTD15PV, TTD11PV, TTD7PV, TTD23PV, TTD20PV, TTD8PV (*red bars*) and from the XP/XP-D patients XP15PV, XP-16PV, XP17PV, XP49BR and XP1BR (*blue bars*) cultured under basal condition (NT, *solid bars*) and after UV irradiation (UV, *empty bars*). The expression level of each gene was normalized to the corresponding expression level of the *GAPDH* housekeeping gene and then to the expression level of the internal control sample TTD12-15PVfather. The reported values represent the means of at least two independent experiments, whose samples have been analyzed in triplicate. Bars indicate the standard errors. M: mother, F: father. Test of significance between the different groups are reported in Fig. 2B.

**Fig. S4** Gene expression of the UV-responsive gene *c-FOS* by real time RT-PCR. The graph indicates the transcription levels of *c-FOS* in fibroblasts from the healthy control (CTR) parents of TTD12PV-15PV, TTD11PV and TTD7PV (*black bars*), from the TTD/XP-D patients TTD12PV, TTD15PV, TTD11PV, TTD7PV, TTD23PV, TTD20PV, TTD8PV (*red bars*) and from the XP/XP-D patients XP15PV, XP-16PV, XP17PV, XP49BR and XP1BR (*blue bars*) cultured under basal condition (*solid bars*) and after UV irradiation (*empty bars*). The expression level of *c-FOS* was normalized to the corresponding expression level of the *GAPDH* housekeeping gene and then to the expression level of the internal control sample TTD12-15PVfather. The reported values represent the means of at least two independent experiments, whose samples have been analyzed in triplicate. Bars indicate the standard errors. M: mother, F: father. **B**) The graph indicates the mean values of the transcript levels shown in A. NT indicates the fibroblasts cultured under basal condition, UV the fibroblasts upon UV irradiation. Bars indicate the standard errors. (\*P <0.05; Student's t-test, only the significant differences are shown).

**Fig. S5** Immunoblot analysis of (A) ANGPTL4 and (B) WISP2, CLU, EGR1, c-Jun, JunD, GADD45A and ID1 in total cell lysates of primary fibroblasts from healthy controls (C3PV, TTD12-15PV parents and XP15-16PV parents) or TTD/XP-D or XP/XP-D patients. When indicated fibroblasts were cultured under basal condition (NT) or 2 hrs after UV irradiation (UV).  $\gamma$ -tubulin is the loading control. The reported values are the mean of at least three independent experiments. Bars indicate standard errors. Abbreviations: NT, not treated; au, arbitrary unit.

**Fig. S6** Immunoblot analysis of XPB, Cdk7 and PTGIS in total cell lysates of primary fibroblasts from healthy control (C3PV) or TS-TTD (TTD1RO). Fibroblasts were cultured at 37° C or 41° C for 10 hours.  $\gamma$ -tubulin is the loading control. The reported values are the mean of at least three

independent experiments. Bars indicate standard errors. Abbreviations: NT, not treated; au, arbitrary unit; TS, thermo-sensitive.

**Fig. S7** Real time quantification of *ANGPTL4*, *PTGIS*, *WISP2*, *EGR1*, *IL20RB* and *WNT4* transcripts in mouse embryonic fibroblasts (MEFs) from *XPDR722W* mice. The graphs indicate the mean values of the transcript levels identified in MEFs isolated from wild type (WT, *grey solid bars*) and TTD (*black empty bars*) mice. The gene expression was normalized to the expression of the rRNA 18S. Bars indicate the standard errors. The reported values represent the means of at least two independent experiments, whose samples have been analyzed in triplicate.



Fig. S1

A

REVIGO Gene Ontology treemap

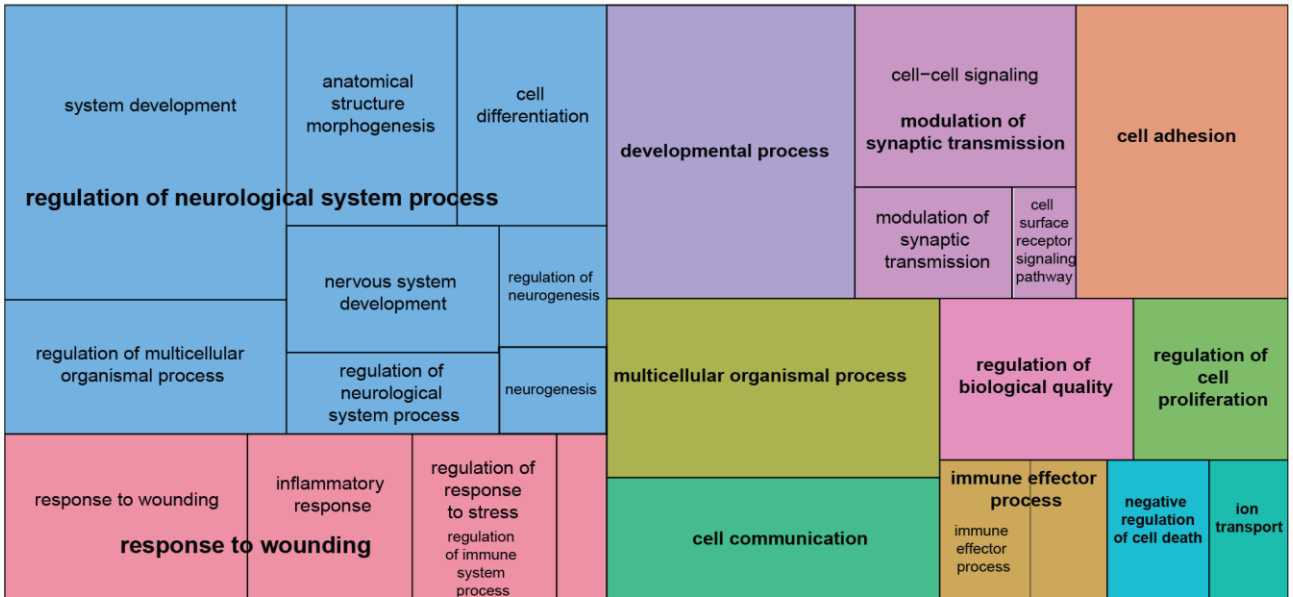

B

REVIGO Gene Ontology treemap

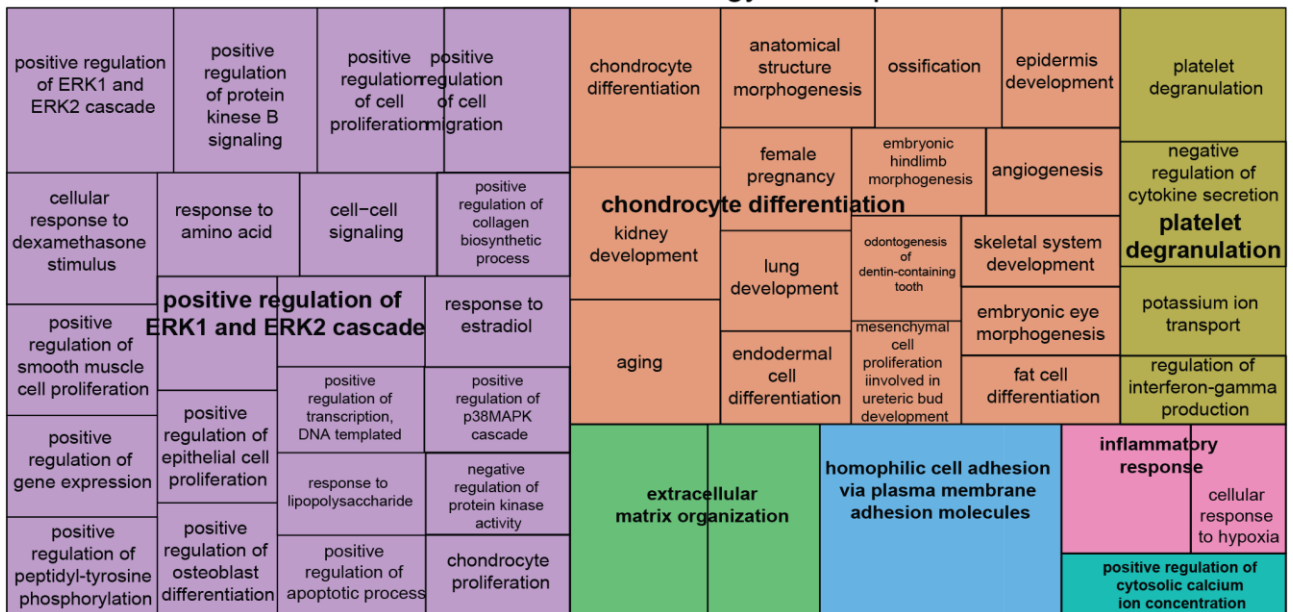

Fig. S2

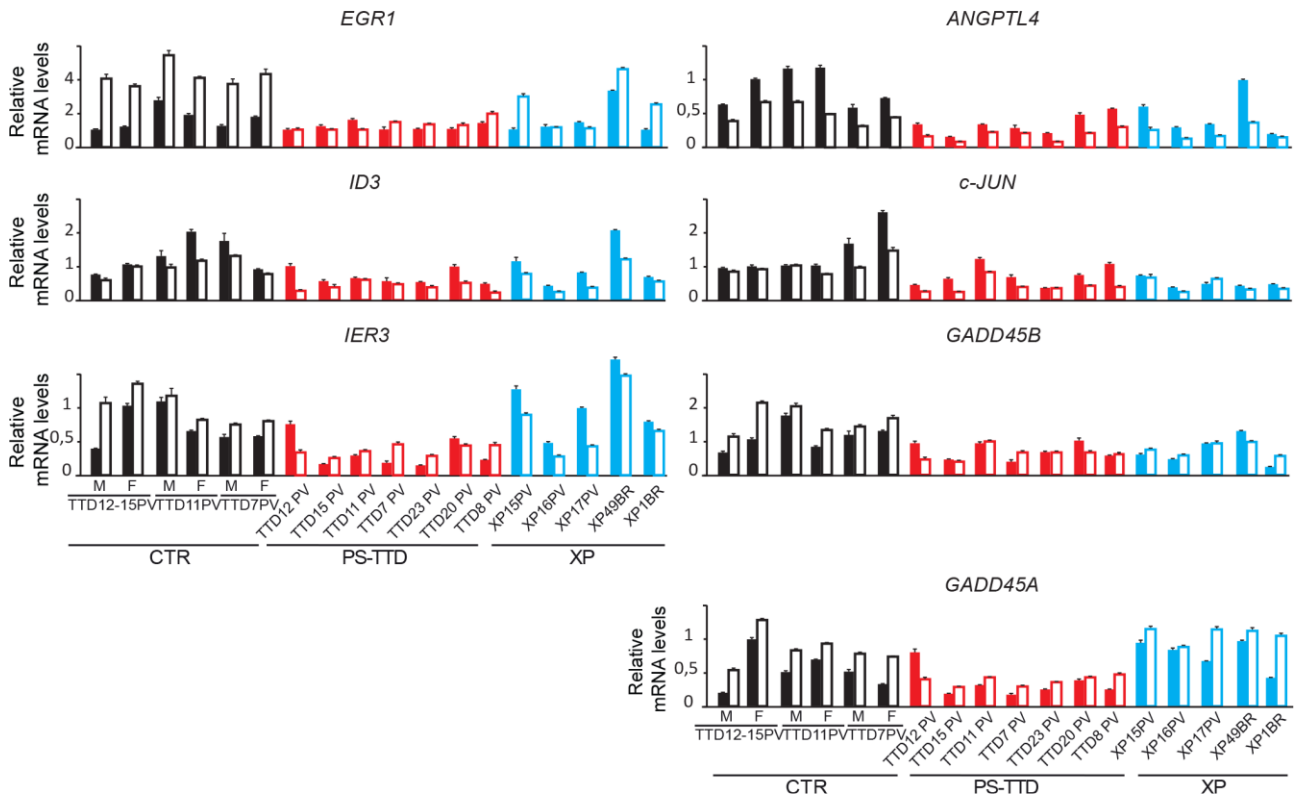

Fig. S3

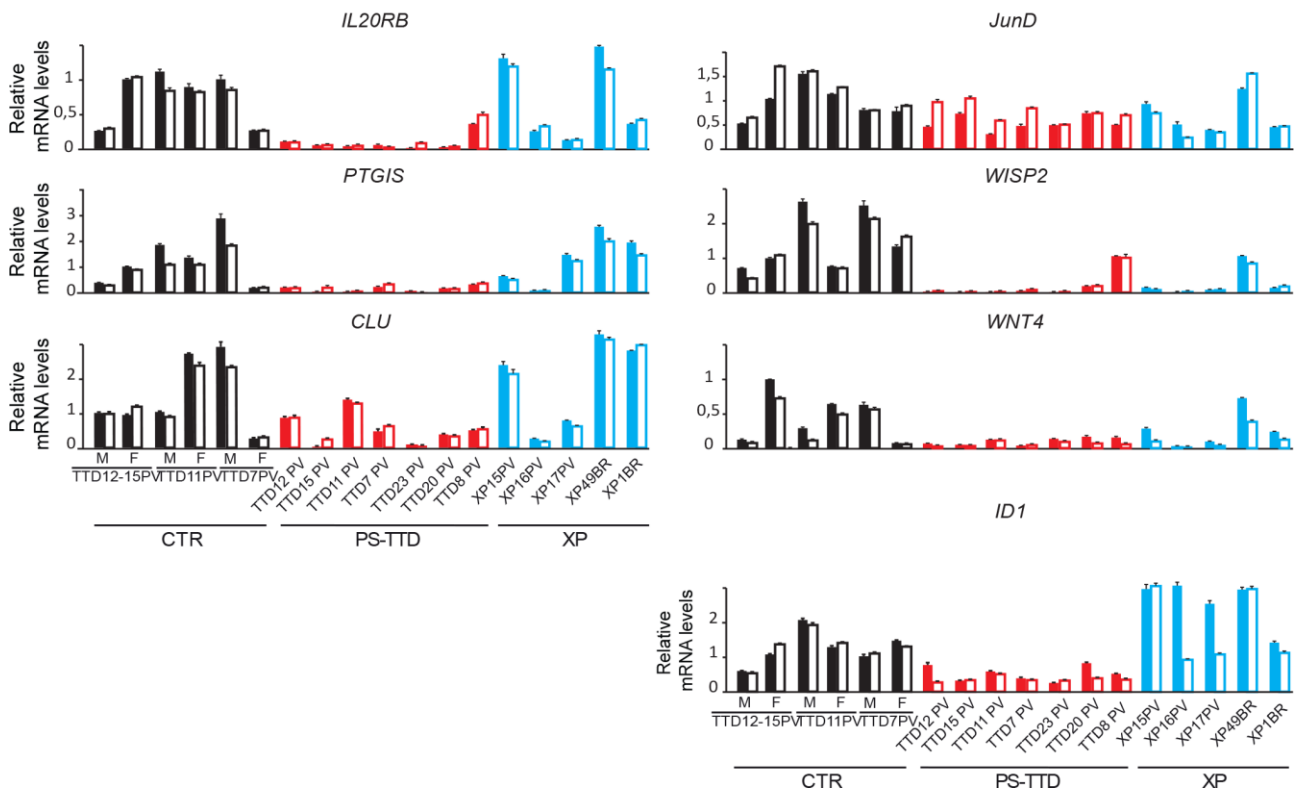

Fig. S4

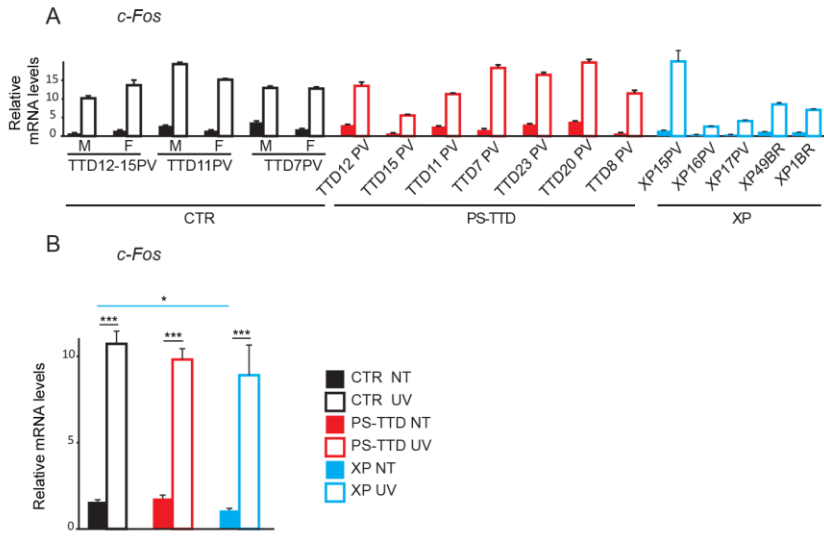

Fig. S5

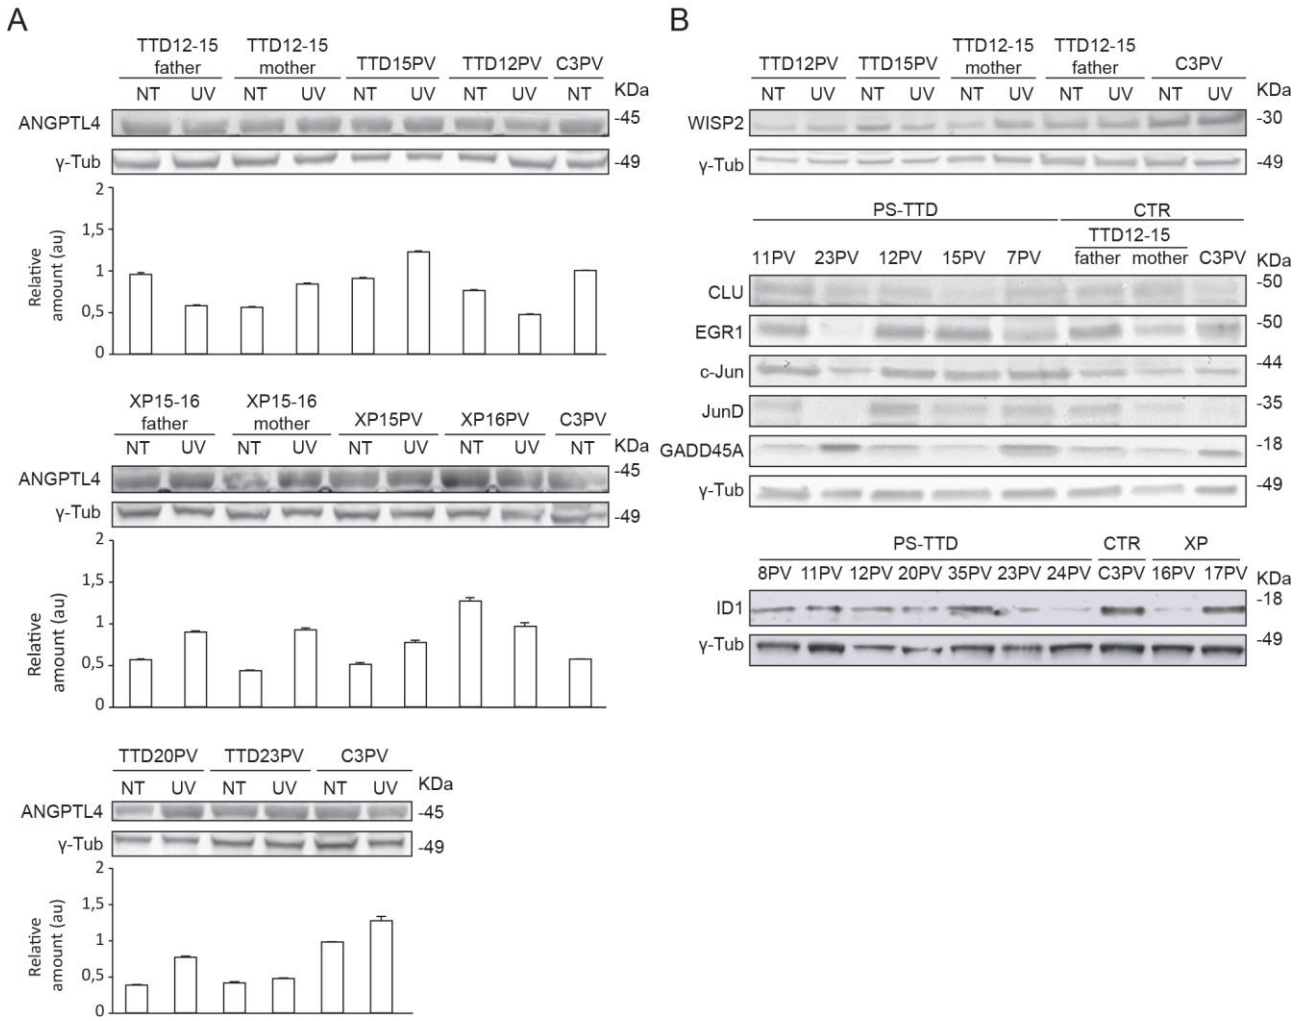

Fig. S6

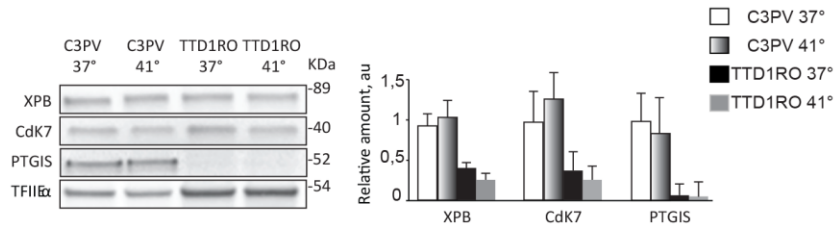

Fig. S7

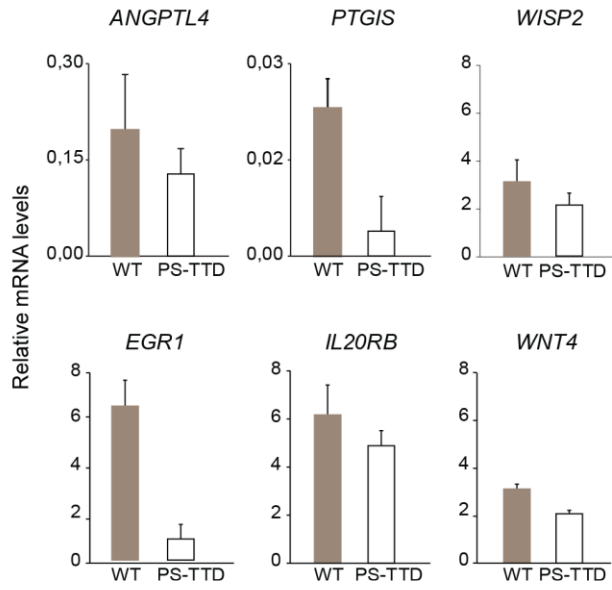

**Table S1.** The most significant differentially expressed genes (P-value  $\leq 0.05$ ) for TTD7PVmother versus TTD7PV fibroblasts in basal condition by RNA-seq

| test_id | locus                     | sample_1        | sample_2  | status | value_1 | value_2  | log2(FC) | test_stat | p_value  | q_value     | significant |
|---------|---------------------------|-----------------|-----------|--------|---------|----------|----------|-----------|----------|-------------|-------------|
| A2M     | chr12:9217772-9268558     | TTD7PVmother_nt | TTD7PV_nt | OK     | 1.66737 | 0.440954 | -1.91887 | -3.0419   | 5.00E-05 | 0.000948525 | yes         |
| ABAT    | chr16:8768443-8878432     | TTD7PVmother_nt | TTD7PV_nt | OK     | 5.44709 | 1.75738  | -1.63206 | -4.1775   | 5.00E-05 | 0.000948525 | yes         |
| ABCA5   | chr17:67144147-67323323   | TTD7PVmother_nt | TTD7PV_nt | OK     | 1.66646 | 0.68467  | -1.2833  | -3.0411   | 5.00E-05 | 0.000948525 | yes         |
| ABCC3   | chr17:48712217-48769063   | TTD7PVmother_nt | TTD7PV_nt | OK     | 9.82092 | 4.40308  | -1.15734 | -2.8166   | 5.00E-05 | 0.000948525 | yes         |
| ABCC9   | chr12:21950323-22089628   | TTD7PVmother_nt | TTD7PV_nt | OK     | 7.70742 | 1.16446  | -2.72659 | -7.7142   | 5.00E-05 | 0.000948525 | yes         |
| ABLM1   | chr10:116190868-116444414 | TTD7PVmother_nt | TTD7PV_nt | OK     | 0.7435  | 0.338822 | -1.1338  | -2.0972   | 0.0007   | 0.00906687  | yes         |
| ACOT1   | chr14:73945188-74025651   | TTD7PVmother_nt | TTD7PV_nt | OK     | 9.04233 | 2.97942  | -1.60166 | -2.5465   | 0.00025  | 0.00388815  | yes         |
| ACP5    | chr19:11685474-11689801   | TTD7PVmother_nt | TTD7PV_nt | OK     | 0.83496 | 0.294078 | -1.50551 | -1.7152   | 0.00335  | 0.0318932   | yes         |
| ACTG2   | chr2:74120092-74146780    | TTD7PVmother_nt | TTD7PV_nt | OK     | 0.11754 | 0.847859 | 2.85062  | 2.45362   | 0.00295  | 0.0286146   | yes         |
| ADAMTS7 | chr15:79051544-79103773   | TTD7PVmother_nt | TTD7PV_nt | OK     | 12.2812 | 4.71733  | -1.38041 | -4.235    | 5.00E-05 | 0.000948525 | yes         |
| ADARB1  | chr21:46494492-46646478   | TTD7PVmother_nt | TTD7PV_nt | OK     | 7.30119 | 2.99451  | -1.28581 | -3.4641   | 5.00E-05 | 0.000948525 | yes         |
| ADCY4   | chr14:24787554-24804277   | TTD7PVmother_nt | TTD7PV_nt | OK     | 4.38309 | 1.0362   | -2.08064 | -4.4523   | 5.00E-05 | 0.000948525 | yes         |
| ADD2    | chr2:70889215-70995375    | TTD7PVmother_nt | TTD7PV_nt | OK     | 0.6088  | 2.13271  | 1.80865  | 3.05896   | 5.00E-05 | 0.000948525 | yes         |
| ADH1B   | chr4:100227526-100242572  | TTD7PVmother_nt | TTD7PV_nt | OK     | 1.25377 | 3.69369  | 1.55879  | 3.24756   | 5.00E-05 | 0.000948525 | yes         |
| ADIRF   | chr10:88728187-88769960   | TTD7PVmother_nt | TTD7PV_nt | OK     | 27.0029 | 12.8958  | -1.06621 | -2.2344   | 5.00E-05 | 0.000948525 | yes         |
| ADORA1  | chr1:203096835-203136533  | TTD7PVmother_nt | TTD7PV_nt | OK     | 0.65023 | 0.034998 | -4.21561 | -2.8773   | 0.00105  | 0.0124816   | yes         |
| ADRA1B  | chr5:159343739-159400017  | TTD7PVmother_nt | TTD7PV_nt | OK     | 0.37612 | 2.05779  | 2.45181  | 4.12543   | 5.00E-05 | 0.000948525 | yes         |
| ADRA2A  | chr10:112836789-112840662 | TTD7PVmother_nt | TTD7PV_nt | OK     | 18.9875 | 3.61544  | -2.39281 | -7.6618   | 5.00E-05 | 0.000948525 | yes         |
| AFF3    | chr2:100163715-100759037  | TTD7PVmother_nt | TTD7PV_nt | OK     | 0.80646 | 2.59973  | 1.68868  | 3.98067   | 5.00E-05 | 0.000948525 | yes         |
| AGTR1   | chr3:148415657-148460790  | TTD7PVmother_nt | TTD7PV_nt | OK     | 0.74753 | 3.81894  | 2.35296  | 4.16632   | 5.00E-05 | 0.000948525 | yes         |
| AHNAK2  | chr14:105403590-105444694 | TTD7PVmother_nt | TTD7PV_nt | OK     | 19.1268 | 9.4339   | -1.01967 | -2.7059   | 5.00E-05 | 0.000948525 | yes         |
| AIM1    | chr6:106959729-107018334  | TTD7PVmother_nt | TTD7PV_nt | OK     | 1.27528 | 3.35957  | 1.39746  | 3.79979   | 5.00E-05 | 0.000948525 | yes         |
| AKR1C2  | chr10:5029967-5060225     | TTD7PVmother_nt | TTD7PV_nt | OK     | 30.8992 | 9.88373  | -1.64444 | -3.9859   | 5.00E-05 | 0.000948525 | yes         |
| ALDH1A1 | chr9:75515577-75568233    | TTD7PVmother_nt | TTD7PV_nt | OK     | 0.36566 | 1.11395  | 1.60711  | 2.39503   | 0.0007   | 0.00906687  | yes         |
| ALDH1A3 | chr15:101420008-101456830 | TTD7PVmother_nt | TTD7PV_nt | OK     | 60.3486 | 212.342  | 1.815    | 5.33869   | 5.00E-05 | 0.000948525 | yes         |
| ALDH1B1 | chr9:38392660-38398662    | TTD7PVmother_nt | TTD7PV_nt | OK     | 20.8103 | 9.54138  | -1.12503 | -3.4688   | 5.00E-05 | 0.000948525 | yes         |
| ALDH2   | chr12:112204690-112247789 | TTD7PVmother_nt | TTD7PV_nt | OK     | 25.0165 | 62.032   | 1.31013  | 4.05388   | 5.00E-05 | 0.000948525 | yes         |
| ALDH3B1 | chr11:67776047-67796743   | TTD7PVmother_nt | TTD7PV_nt | OK     | 18.2788 | 5.65484  | -1.69262 | -4.8542   | 5.00E-05 | 0.000948525 | yes         |
| ALS2CL  | chr3:46710484-46735194    | TTD7PVmother_nt | TTD7PV_nt | OK     | 1.15552 | 0.264842 | -2.12533 | -3.3292   | 5.00E-05 | 0.000948525 | yes         |
| AMIGO1  | chr1:110049445-110052336  | TTD7PVmother_nt | TTD7PV_nt | OK     | 1.40918 | 0.22879  | -2.62276 | -4.0422   | 5.00E-05 | 0.000948525 | yes         |
| AMIGO2  | chr12:47469489-47473734   | TTD7PVmother_nt | TTD7PV_nt | OK     | 15.6896 | 7.12738  | -1.13837 | -3.1912   | 5.00E-05 | 0.000948525 | yes         |

|          |                               |                 |           |    |         |          |          |         |          |             |     |
|----------|-------------------------------|-----------------|-----------|----|---------|----------|----------|---------|----------|-------------|-----|
| AMPD3    | chr11:10471867-10529126       | TTD7PVmother_nt | TTD7PV_nt | OK | 5.7657  | 1.95282  | -1.56194 | -4.0622 | 5.00E-05 | 0.000948525 | yes |
| ANGPT1   | chr8:108261709-108510254      | TTD7PVmother_nt | TTD7PV_nt | OK | 4.78695 | 1.00436  | -2.25283 | -4.9928 | 5.00E-05 | 0.000948525 | yes |
| ANGPTL4  | chr19:8429010-8439257         | TTD7PVmother_nt | TTD7PV_nt | OK | 8.19451 | 3.15691  | -1.37615 | -3.1123 | 5.00E-05 | 0.000948525 | yes |
| ANKRD33B | chr5:10564434-10657928        | TTD7PVmother_nt | TTD7PV_nt | OK | 2.43557 | 0.945505 | -1.3651  | -3.6418 | 5.00E-05 | 0.000948525 | yes |
| ANKRD44  | chr2:197851385-198175521      | TTD7PVmother_nt | TTD7PV_nt | OK | 2.86358 | 1.37496  | -1.05843 | -2.2494 | 0.0004   | 0.00575481  | yes |
| ANO4     | chr12:101188373-101522419     | TTD7PVmother_nt | TTD7PV_nt | OK | 1.57658 | 0.37308  | -2.07924 | -3.929  | 5.00E-05 | 0.000948525 | yes |
| ANTXR1   | chr2:69240275-69476459        | TTD7PVmother_nt | TTD7PV_nt | OK | 120.895 | 57.9711  | -1.06035 | -2.6238 | 5.00E-05 | 0.000948525 | yes |
| AP1S2    | chrX:15843928-15873137        | TTD7PVmother_nt | TTD7PV_nt | OK | 22.167  | 9.67943  | -1.19542 | -3.7963 | 5.00E-05 | 0.000948525 | yes |
| AP1S3    | chr2:224620046-224702319      | TTD7PVmother_nt | TTD7PV_nt | OK | 0.8322  | 0.358861 | -1.2135  | -2.2535 | 0.0017   | 0.0184518   | yes |
| APBB1IP  | chr10:26727265-26856732       | TTD7PVmother_nt | TTD7PV_nt | OK | 27.3044 | 7.10639  | -1.94194 | -6.3645 | 5.00E-05 | 0.000948525 | yes |
| APCDD1L  | chr20:57034425-57089949       | TTD7PVmother_nt | TTD7PV_nt | OK | 6.4163  | 1.04156  | -2.62299 | -6.428  | 5.00E-05 | 0.000948525 | yes |
| APOL1    | chr22:36649116-36663577       | TTD7PVmother_nt | TTD7PV_nt | OK | 3.89405 | 0.335352 | -3.53752 | -5.6749 | 5.00E-05 | 0.000948525 | yes |
| AQP1     | chr7:30951414-30965131        | TTD7PVmother_nt | TTD7PV_nt | OK | 1.07514 | 0.464637 | -1.21035 | -1.8086 | 0.00145  | 0.0163452   | yes |
| AR       | chrX:66763873-66950461        | TTD7PVmother_nt | TTD7PV_nt | OK | 1.22311 | 0.061029 | -4.32491 | -6.894  | 5.00E-05 | 0.000948525 | yes |
| ARC      | chr8:143692404-143695833      | TTD7PVmother_nt | TTD7PV_nt | OK | 3.13932 | 0.196181 | -4.0002  | -6.3894 | 5.00E-05 | 0.000948525 | yes |
| ARHGAP22 | chr10:49654067-49864310       | TTD7PVmother_nt | TTD7PV_nt | OK | 8.39682 | 3.26384  | -1.36327 | -3.4594 | 5.00E-05 | 0.000948525 | yes |
| ARHGAP23 | chr17:36584719-36668628       | TTD7PVmother_nt | TTD7PV_nt | OK | 25.3749 | 56.2557  | 1.14859  | 3.67765 | 5.00E-05 | 0.000948525 | yes |
| ARHGEF28 | chr5:72921982-73237818        | TTD7PVmother_nt | TTD7PV_nt | OK | 2.2196  | 0.595016 | -1.8993  | -3.9321 | 5.00E-05 | 0.000948525 | yes |
| ARL4D    | chr17:41476352-41478504       | TTD7PVmother_nt | TTD7PV_nt | OK | 21.7015 | 10.3758  | -1.06458 | -3.5611 | 5.00E-05 | 0.000948525 | yes |
| ARRB1    | chr11:74971165-75062875       | TTD7PVmother_nt | TTD7PV_nt | OK | 1.19688 | 0.355455 | -1.75155 | -3.4195 | 5.00E-05 | 0.000948525 | yes |
| ARRDC4   | chr15:98503932-98517068       | TTD7PVmother_nt | TTD7PV_nt | OK | 7.91167 | 2.65044  | -1.57775 | -4.5324 | 5.00E-05 | 0.000948525 | yes |
| ASIC3    | chr7:150745378-150749843      | TTD7PVmother_nt | TTD7PV_nt | OK | 0.58296 | 0.238396 | -1.29003 | -1.6447 | 0.00575  | 0.0484643   | yes |
| ASNS     | chr7:97481428-97501854        | TTD7PVmother_nt | TTD7PV_nt | OK | 41.1515 | 98.1499  | 1.25404  | 3.80716 | 5.00E-05 | 0.000948525 | yes |
| ASS1     | chr9:133320093-133376661      | TTD7PVmother_nt | TTD7PV_nt | OK | 16.8307 | 51.3917  | 1.61044  | 4.44453 | 5.00E-05 | 0.000948525 | yes |
| ATF5     | chr19:50392912-50437193       | TTD7PVmother_nt | TTD7PV_nt | OK | 83.4034 | 36.5772  | -1.18916 | -2.6567 | 5.00E-05 | 0.000948525 | yes |
| ATP13A3  | chr3:194123402-194188968      | TTD7PVmother_nt | TTD7PV_nt | OK | 61.1736 | 24.8814  | -1.29784 | -4.4069 | 5.00E-05 | 0.000948525 | yes |
| ATP6V1G3 | chr1:198492351-198510075      | TTD7PVmother_nt | TTD7PV_nt | OK | 1.52336 | 0.356214 | -2.09644 | -1.6694 | 0.00515  | 0.0445157   | yes |
| ATP8B4   | chr15:50150434-50411419       | TTD7PVmother_nt | TTD7PV_nt | OK | 0.85327 | 0.254311 | -1.74641 | -2.9474 | 5.00E-05 | 0.000948525 | yes |
| B3GALT4  | chr6_qbl_hap6:4477155-4478841 | TTD7PVmother_nt | TTD7PV_nt | OK | 2.20387 | 0.987528 | -1.15814 | -2.2803 | 0.002    | 0.0210507   | yes |
| B3GNT8   | chr19:41931263-41934635       | TTD7PVmother_nt | TTD7PV_nt | OK | 2.75562 | 0.944645 | -1.54453 | -3.1507 | 5.00E-05 | 0.000948525 | yes |
| BAI2     | chr1:32192717-32229648        | TTD7PVmother_nt | TTD7PV_nt | OK | 2.83284 | 0.998036 | -1.50508 | -3.5498 | 5.00E-05 | 0.000948525 | yes |
| BCHE     | chr3:165490691-165555253      | TTD7PVmother_nt | TTD7PV_nt | OK | 1.4535  | 6.03616  | 2.0541   | 4.97313 | 5.00E-05 | 0.000948525 | yes |
| BEAN1    | chr16:66461199-66527432       | TTD7PVmother_nt | TTD7PV_nt | OK | 0.90708 | 0.152173 | -2.57552 | -2.7347 | 5.00E-05 | 0.000948525 | yes |

|          |                           |                 |           |    |         |          |          |         |          |             |     |
|----------|---------------------------|-----------------|-----------|----|---------|----------|----------|---------|----------|-------------|-----|
| BEX1     | chrX:102317580-102319168  | TTD7PVmother_nt | TTD7PV_nt | OK | 4.65986 | 0.194329 | -4.58371 | -5.6911 | 0.0006   | 0.00798882  | yes |
| BEX2     | chrX:102564273-102565974  | TTD7PVmother_nt | TTD7PV_nt | OK | 0.60365 | 2.96011  | 2.29386  | 2.7427  | 5.00E-05 | 0.000948525 | yes |
| BHMT2    | chr5:78365546-78385897    | TTD7PVmother_nt | TTD7PV_nt | OK | 3.35265 | 1.61434  | -1.05436 | -2.1477 | 0.00045  | 0.0062912   | yes |
| BMP2     | chr20:6748744-6760910     | TTD7PVmother_nt | TTD7PV_nt | OK | 3.10857 | 0.857126 | -1.85867 | -3.9056 | 5.00E-05 | 0.000948525 | yes |
| BTN2A2   | chr6:26383323-26395100    | TTD7PVmother_nt | TTD7PV_nt | OK | 3.38699 | 1.44275  | -1.23119 | -2.3936 | 0.0001   | 0.00172182  | yes |
| BTN3A2   | chr6:26365397-26378548    | TTD7PVmother_nt | TTD7PV_nt | OK | 2.32863 | 4.71795  | 1.01868  | 2.42967 | 5.00E-05 | 0.000948525 | yes |
| C10orf10 | chr10:45455218-45490172   | TTD7PVmother_nt | TTD7PV_nt | OK | 6.05894 | 1.78893  | -1.75997 | -3.0299 | 0.00015  | 0.00249264  | yes |
| C11orf45 | chr11:128761312-128787951 | TTD7PVmother_nt | TTD7PV_nt | OK | 0.43951 | 0.124266 | -1.82245 | -2.2491 | 0.00055  | 0.00745427  | yes |
| C11orf87 | chr11:109292845-109299893 | TTD7PVmother_nt | TTD7PV_nt | OK | 1.09611 | 3.32365  | 1.60038  | 4.45993 | 5.00E-05 | 0.000948525 | yes |
| C14orf37 | chr14:58470807-58618847   | TTD7PVmother_nt | TTD7PV_nt | OK | 7.17354 | 3.38589  | -1.08315 | -2.9798 | 5.00E-05 | 0.000948525 | yes |
| C17orf97 | chr17:260117-264457       | TTD7PVmother_nt | TTD7PV_nt | OK | 1.68594 | 4.90312  | 1.54014  | 3.54952 | 5.00E-05 | 0.000948525 | yes |
| C1QTNF1  | chr17:77015290-77045870   | TTD7PVmother_nt | TTD7PV_nt | OK | 5.76818 | 1.4694   | -1.97289 | -4.3611 | 5.00E-05 | 0.000948525 | yes |
| C1orf115 | chr1:220863627-220872499  | TTD7PVmother_nt | TTD7PV_nt | OK | 4.08693 | 0.736264 | -2.47272 | -5.0512 | 5.00E-05 | 0.000948525 | yes |
| C1orf198 | chr1:230972864-231005335  | TTD7PVmother_nt | TTD7PV_nt | OK | 55.0879 | 24.6383  | -1.16084 | -3.5553 | 5.00E-05 | 0.000948525 | yes |
| C21orf7  | chr21:30452872-30548202   | TTD7PVmother_nt | TTD7PV_nt | OK | 10.2541 | 4.8271   | -1.08697 | -3.3012 | 5.00E-05 | 0.000948525 | yes |
| C2orf74  | chr2:61372242-61391964    | TTD7PVmother_nt | TTD7PV_nt | OK | 5.33371 | 12.5187  | 1.23087  | 2.32073 | 0.0001   | 0.00172182  | yes |
| C3       | chr19:6677845-6720662     | TTD7PVmother_nt | TTD7PV_nt | OK | 1.78645 | 3.67975  | 1.04252  | 2.52422 | 5.00E-05 | 0.000948525 | yes |
| C3orf55  | chr3:157261132-157319021  | TTD7PVmother_nt | TTD7PV_nt | OK | 6.13462 | 1.25471  | -2.28962 | -3.6443 | 5.00E-05 | 0.000948525 | yes |
| C3orf72  | chr3:138666075-138672830  | TTD7PVmother_nt | TTD7PV_nt | OK | 1.41411 | 0.137304 | -3.36445 | -5.2813 | 5.00E-05 | 0.000948525 | yes |
| C5AR2    | chr19:47835403-47845272   | TTD7PVmother_nt | TTD7PV_nt | OK | 1.05249 | 0.200438 | -2.39258 | -2.4486 | 0.0001   | 0.00172182  | yes |
| CACNB2   | chr10:18429605-18830688   | TTD7PVmother_nt | TTD7PV_nt | OK | 0.72661 | 0.251902 | -1.52832 | -2.2537 | 5.00E-05 | 0.000948525 | yes |
| CALB2    | chr16:71392615-71424342   | TTD7PVmother_nt | TTD7PV_nt | OK | 0.85589 | 0.111843 | -2.93596 | -2.1135 | 0.00035  | 0.00513307  | yes |
| CAMK2N1  | chr1:20808883-20812728    | TTD7PVmother_nt | TTD7PV_nt | OK | 29.0848 | 11.0163  | -1.40063 | -5.1401 | 5.00E-05 | 0.000948525 | yes |
| CBWD5    | chr9:70431999-70490177    | TTD7PVmother_nt | TTD7PV_nt | OK | 2.26483 | 0.871388 | -1.37801 | -1.7803 | 0.00295  | 0.0286146   | yes |
| CCDC163P | chr1:45959597-45965751    | TTD7PVmother_nt | TTD7PV_nt | OK | 0.42343 | 1.37526  | 1.6995   | 2.51021 | 0.00015  | 0.00249264  | yes |
| CCDC36   | chr3:49235860-49295537    | TTD7PVmother_nt | TTD7PV_nt | OK | 0.30195 | 0.746126 | 1.30512  | 1.73991 | 0.00215  | 0.022301    | yes |
| CCDC69   | chr5:150560612-150603654  | TTD7PVmother_nt | TTD7PV_nt | OK | 2.56608 | 0.988184 | -1.37671 | -2.9521 | 5.00E-05 | 0.000948525 | yes |
| CCDC81   | chr11:86085777-86134151   | TTD7PVmother_nt | TTD7PV_nt | OK | 0.46522 | 0.127356 | -1.86905 | -1.9112 | 0.0011   | 0.0129681   | yes |
| CCL2     | chr17:32582295-32584220   | TTD7PVmother_nt | TTD7PV_nt | OK | 7.36439 | 3.03045  | -1.28104 | -3.2164 | 0.00025  | 0.00388815  | yes |
| CCND2    | chr12:4382901-4414522     | TTD7PVmother_nt | TTD7PV_nt | OK | 0.23144 | 0.556157 | 1.26483  | 2.18653 | 0.00075  | 0.0095227   | yes |
| CCR7     | chr17:38710021-38721736   | TTD7PVmother_nt | TTD7PV_nt | OK | 1.00871 | 0.194057 | -2.37795 | -3.4142 | 5.00E-05 | 0.000948525 | yes |
| CD36     | chr7:80231503-80308593    | TTD7PVmother_nt | TTD7PV_nt | OK | 6.3876  | 0.914468 | -2.80427 | -4.796  | 5.00E-05 | 0.000948525 | yes |
| CD82     | chr11:44587140-44641315   | TTD7PVmother_nt | TTD7PV_nt | OK | 5.03004 | 1.74267  | -1.52927 | -2.9092 | 5.00E-05 | 0.000948525 | yes |



|         |                           |                 |           |    |         |          |          |         |          |             |     |
|---------|---------------------------|-----------------|-----------|----|---------|----------|----------|---------|----------|-------------|-----|
| CDA     | chr1:20915443-20945400    | TTD7PVmother_nt | TTD7PV_nt | OK | 12.589  | 2.91873  | -2.10875 | -5.4533 | 5.00E-05 | 0.000948525 | yes |
| CDCA7   | chr2:174219560-174233718  | TTD7PVmother_nt | TTD7PV_nt | OK | 0.59876 | 1.83352  | 1.61456  | 2.77073 | 5.00E-05 | 0.000948525 | yes |
| CDH10   | chr5:24487208-24645085    | TTD7PVmother_nt | TTD7PV_nt | OK | 3.28203 | 6.77509  | 1.04565  | 2.97033 | 5.00E-05 | 0.000948525 | yes |
| CDH18   | chr5:19473154-19988353    | TTD7PVmother_nt | TTD7PV_nt | OK | 1.45629 | 9.18302  | 2.65667  | 6.04369 | 5.00E-05 | 0.000948525 | yes |
| CDH4    | chr20:59827481-60515673   | TTD7PVmother_nt | TTD7PV_nt | OK | 2.79722 | 1.25642  | -1.15468 | -2.7825 | 5.00E-05 | 0.000948525 | yes |
| CDH6    | chr5:31193761-31329253    | TTD7PVmother_nt | TTD7PV_nt | OK | 0.66599 | 2.03423  | 1.6109   | 3.96251 | 5.00E-05 | 0.000948525 | yes |
| CDK15   | chr2:202671151-202760273  | TTD7PVmother_nt | TTD7PV_nt | OK | 0.8295  | 2.38425  | 1.52323  | 2.82913 | 0.0001   | 0.00172182  | yes |
| CDS1    | chr4:85504056-85572493    | TTD7PVmother_nt | TTD7PV_nt | OK | 0.53668 | 0.065989 | -3.02376 | -4.0428 | 5.00E-05 | 0.000948525 | yes |
| CECR7   | chr22:17517459-17539682   | TTD7PVmother_nt | TTD7PV_nt | OK | 0.55273 | 2.23654  | 2.01662  | 3.84784 | 5.00E-05 | 0.000948525 | yes |
| CERS4   | chr19:8274216-8327304     | TTD7PVmother_nt | TTD7PV_nt | OK | 2.69036 | 0.780945 | -1.78451 | -3.4279 | 5.00E-05 | 0.000948525 | yes |
| CES4A   | chr16:67022491-67043659   | TTD7PVmother_nt | TTD7PV_nt | OK | 1.98359 | 0.982135 | -1.01412 | -1.7147 | 0.00205  | 0.0214716   | yes |
| CFI     | chr4:110661847-110723335  | TTD7PVmother_nt | TTD7PV_nt | OK | 0.42526 | 1.09663  | 1.36667  | 2.23059 | 0.0012   | 0.0139552   | yes |
| CH25H   | chr10:90965693-90967071   | TTD7PVmother_nt | TTD7PV_nt | OK | 14.9136 | 30.3392  | 1.02455  | 3.91788 | 5.00E-05 | 0.000948525 | yes |
| CHAC1   | chr15:41245635-41248717   | TTD7PVmother_nt | TTD7PV_nt | OK | 8.68205 | 27.84    | 1.68105  | 4.58349 | 5.00E-05 | 0.000948525 | yes |
| CHL1    | chr3:238278-451097        | TTD7PVmother_nt | TTD7PV_nt | OK | 0.44263 | 0.114316 | -1.95307 | -2.6321 | 5.00E-05 | 0.000948525 | yes |
| CHST7   | chrX:46433191-46457838    | TTD7PVmother_nt | TTD7PV_nt | OK | 6.43257 | 3.0667   | -1.06871 | -3.0743 | 0.00015  | 0.00249264  | yes |
| CLCA2   | chr1:86889768-86922240    | TTD7PVmother_nt | TTD7PV_nt | OK | 0.67353 | 0.197431 | -1.7704  | -2.5906 | 0.00035  | 0.00513307  | yes |
| CLCN4   | chrX:10124984-10205699    | TTD7PVmother_nt | TTD7PV_nt | OK | 0.62443 | 0.214198 | -1.5436  | -2.6697 | 0.0001   | 0.00172182  | yes |
| CLDN23  | chr8:8559665-8561617      | TTD7PVmother_nt | TTD7PV_nt | OK | 3.27022 | 0.522449 | -2.64603 | -5.0486 | 5.00E-05 | 0.000948525 | yes |
| CLDN4   | chr7:73245192-73247015    | TTD7PVmother_nt | TTD7PV_nt | OK | 0.81883 | 0.311567 | -1.39401 | -2.104  | 0.00435  | 0.0390438   | yes |
| CLEC3B  | chr3:45067758-45077563    | TTD7PVmother_nt | TTD7PV_nt | OK | 34.55   | 10.4169  | -1.72977 | -5.793  | 5.00E-05 | 0.000948525 | yes |
| CLGN    | chr4:141309606-141348815  | TTD7PVmother_nt | TTD7PV_nt | OK | 2.56585 | 13.5332  | 2.39899  | 5.83929 | 5.00E-05 | 0.000948525 | yes |
| CLIC3   | chr9:139889059-139891024  | TTD7PVmother_nt | TTD7PV_nt | OK | 31.8148 | 7.48328  | -2.08795 | -7.108  | 5.00E-05 | 0.000948525 | yes |
| CLU     | chr8:27454433-27472328    | TTD7PVmother_nt | TTD7PV_nt | OK | 344.09  | 118.737  | -1.53501 | -3.7274 | 5.00E-05 | 0.000948525 | yes |
| CNN1    | chr19:11649578-11661138   | TTD7PVmother_nt | TTD7PV_nt | OK | 22.9943 | 7.63078  | -1.59137 | -4.3846 | 5.00E-05 | 0.000948525 | yes |
| COL11A1 | chr1:103342022-103574052  | TTD7PVmother_nt | TTD7PV_nt | OK | 14.7031 | 0.846683 | -4.11816 | -7.3698 | 5.00E-05 | 0.000948525 | yes |
| COL14A1 | chr8:121137346-121384273  | TTD7PVmother_nt | TTD7PV_nt | OK | 3.4144  | 10.2403  | 1.58455  | 4.67038 | 5.00E-05 | 0.000948525 | yes |
| COL4A1  | chr13:110801309-110959496 | TTD7PVmother_nt | TTD7PV_nt | OK | 34.1671 | 3.91867  | -3.12417 | -7.3083 | 5.00E-05 | 0.000948525 | yes |
| COL4A2  | chr13:110959630-111165373 | TTD7PVmother_nt | TTD7PV_nt | OK | 60.2319 | 9.98011  | -2.5934  | -5.7561 | 5.00E-05 | 0.000948525 | yes |
| COL6A6  | chr3:130279177-130395888  | TTD7PVmother_nt | TTD7PV_nt | OK | 1.14186 | 0.45368  | -1.33163 | -2.75   | 5.00E-05 | 0.000948525 | yes |
| COL7A1  | chr3:48601505-48632593    | TTD7PVmother_nt | TTD7PV_nt | OK | 2.4294  | 0.746804 | -1.7018  | -4.046  | 5.00E-05 | 0.000948525 | yes |
| COMP    | chr19:18893582-18902114   | TTD7PVmother_nt | TTD7PV_nt | OK | 135.057 | 60.7699  | -1.15214 | -2.4081 | 0.00015  | 0.00249264  | yes |
| CORO6   | chr17:27920526-27948441   | TTD7PVmother_nt | TTD7PV_nt | OK | 4.14278 | 1.4819   | -1.48315 | -2.0551 | 0.0019   | 0.02013     | yes |

|         |                           |                 |           |    |         |          |          |         |          |             |     |
|---------|---------------------------|-----------------|-----------|----|---------|----------|----------|---------|----------|-------------|-----|
| CPA3    | chr3:148583042-148614872  | TTD7PVmother_nt | TTD7PV_nt | OK | 0.07397 | 0.967993 | 3.71005  | 3.93991 | 0.00155  | 0.0171863   | yes |
| CPB1    | chr3:148545587-148577972  | TTD7PVmother_nt | TTD7PV_nt | OK | 0.08463 | 1.93174  | 4.51253  | 4.26636 | 0.0024   | 0.0244215   | yes |
| CPM     | chr12:69244955-69357020   | TTD7PVmother_nt | TTD7PV_nt | OK | 1.73624 | 0.662403 | -1.39019 | -3.13   | 5.00E-05 | 0.000948525 | yes |
| CPN2    | chr3:194060493-194072057  | TTD7PVmother_nt | TTD7PV_nt | OK | 0.56001 | 0.078647 | -2.83201 | -3.3544 | 5.00E-05 | 0.000948525 | yes |
| CPXM2   | chr10:125505151-125651500 | TTD7PVmother_nt | TTD7PV_nt | OK | 4.99303 | 1.04124  | -2.26161 | -4.9264 | 5.00E-05 | 0.000948525 | yes |
| CRABP2  | chr1:156669399-156675608  | TTD7PVmother_nt | TTD7PV_nt | OK | 72.6338 | 266.935  | 1.87777  | 5.39787 | 5.00E-05 | 0.000948525 | yes |
| CRIP2   | chr14:105939274-105946507 | TTD7PVmother_nt | TTD7PV_nt | OK | 28.1749 | 13.739   | -1.03613 | -2.6048 | 5.00E-05 | 0.000948525 | yes |
| CRLF1   | chr19:18704034-18717660   | TTD7PVmother_nt | TTD7PV_nt | OK | 83.1419 | 8.68554  | -3.25889 | -7.992  | 5.00E-05 | 0.000948525 | yes |
| CRYAB   | chr11:111779349-111782473 | TTD7PVmother_nt | TTD7PV_nt | OK | 274.772 | 98.5091  | -1.4799  | -7.7406 | 5.00E-05 | 0.000948525 | yes |
| CRYZ    | chr1:75171171-75232360    | TTD7PVmother_nt | TTD7PV_nt | OK | 12.7389 | 3.91353  | -1.7027  | -3.3054 | 5.00E-05 | 0.000948525 | yes |
| CSRP2   | chr12:77252495-77272799   | TTD7PVmother_nt | TTD7PV_nt | OK | 44.5854 | 13.6696  | -1.7056  | -5.6173 | 5.00E-05 | 0.000948525 | yes |
| CTH     | chr1:70876900-70905534    | TTD7PVmother_nt | TTD7PV_nt | OK | 4.41625 | 10.3361  | 1.2268   | 3.28535 | 5.00E-05 | 0.000948525 | yes |
| CTSK    | chr1:150768683-150780917  | TTD7PVmother_nt | TTD7PV_nt | OK | 712.749 | 327.212  | -1.12317 | -2.469  | 0.00045  | 0.0062912   | yes |
| CTXN1   | chr19:7989380-7991051     | TTD7PVmother_nt | TTD7PV_nt | OK | 8.609   | 3.71804  | -1.2113  | -3.4387 | 5.00E-05 | 0.000948525 | yes |
| CXCL1   | chr4:74735108-74737019    | TTD7PVmother_nt | TTD7PV_nt | OK | 3.51809 | 0.981654 | -1.84151 | -2.7502 | 0.0001   | 0.00172182  | yes |
| CXCL6   | chr4:74702272-74704477    | TTD7PVmother_nt | TTD7PV_nt | OK | 3.19423 | 1.40562  | -1.18426 | -2.7146 | 0.0011   | 0.0129681   | yes |
| CYGB    | chr17:74523429-74541458   | TTD7PVmother_nt | TTD7PV_nt | OK | 22.3502 | 10.4611  | -1.09525 | -3.5601 | 5.00E-05 | 0.000948525 | yes |
| CYP26B1 | chr2:72356366-72374963    | TTD7PVmother_nt | TTD7PV_nt | OK | 1.59336 | 5.02609  | 1.65736  | 4.47667 | 5.00E-05 | 0.000948525 | yes |
| CYP2E1  | chr10:135340866-135352620 | TTD7PVmother_nt | TTD7PV_nt | OK | 1.9899  | 0.599875 | -1.72996 | -3.0582 | 5.00E-05 | 0.000948525 | yes |
| CYTL1   | chr4:5016313-5021197      | TTD7PVmother_nt | TTD7PV_nt | OK | 1.25208 | 4.68433  | 1.90352  | 3.95483 | 5.00E-05 | 0.000948525 | yes |
| DAAM2   | chr6:39760158-39902290    | TTD7PVmother_nt | TTD7PV_nt | OK | 8.56527 | 3.39168  | -1.3365  | -3.2107 | 5.00E-05 | 0.000948525 | yes |
| DAPK1   | chr9:90112755-90323549    | TTD7PVmother_nt | TTD7PV_nt | OK | 4.81503 | 0.611299 | -2.97759 | -6.8861 | 5.00E-05 | 0.000948525 | yes |
| DBC1    | chr9:121928907-122131739  | TTD7PVmother_nt | TTD7PV_nt | OK | 5.3907  | 0.825721 | -2.70675 | -5.9132 | 5.00E-05 | 0.000948525 | yes |
| DBNDD1  | chr16:90071278-90085937   | TTD7PVmother_nt | TTD7PV_nt | OK | 0.72038 | 0.135836 | -2.40689 | -2.5829 | 0.00025  | 0.00388815  | yes |
| DDIT4   | chr10:74033676-74035797   | TTD7PVmother_nt | TTD7PV_nt | OK | 46.8775 | 99.0263  | 1.07892  | 3.93441 | 5.00E-05 | 0.000948525 | yes |
| DDIT4L  | chr4:101107026-101111655  | TTD7PVmother_nt | TTD7PV_nt | OK | 5.47108 | 1.2914   | -2.08289 | -5.106  | 5.00E-05 | 0.000948525 | yes |
| DENND3  | chr8:142138719-142205900  | TTD7PVmother_nt | TTD7PV_nt | OK | 3.94055 | 0.81117  | -2.28032 | -5.3745 | 5.00E-05 | 0.000948525 | yes |
| DISP2   | chr15:40650433-40663256   | TTD7PVmother_nt | TTD7PV_nt | OK | 2.4441  | 1.06526  | -1.1981  | -2.8641 | 5.00E-05 | 0.000948525 | yes |
| DLX1    | chr2:172950207-172954401  | TTD7PVmother_nt | TTD7PV_nt | OK | 1.79086 | 0.296874 | -2.59273 | -3.6902 | 5.00E-05 | 0.000948525 | yes |
| DLX2    | chr2:172964165-172967478  | TTD7PVmother_nt | TTD7PV_nt | OK | 3.10555 | 1.47325  | -1.07585 | -2.5047 | 0.0012   | 0.0139552   | yes |
| DNAJC6  | chr1:65730376-65881552    | TTD7PVmother_nt | TTD7PV_nt | OK | 1.49502 | 0.593283 | -1.33337 | -2.7579 | 5.00E-05 | 0.000948525 | yes |
| DOCK4   | chr7:111366163-111846462  | TTD7PVmother_nt | TTD7PV_nt | OK | 0.87389 | 0.192187 | -2.18494 | -4.0353 | 5.00E-05 | 0.000948525 | yes |
| DPP4    | chr2:162848754-162931052  | TTD7PVmother_nt | TTD7PV_nt | OK | 158.739 | 20.3205  | -2.96565 | -8.39   | 5.00E-05 | 0.000948525 | yes |

|          |                           |                 |           |    |         |          |          |         |          |             |     |
|----------|---------------------------|-----------------|-----------|----|---------|----------|----------|---------|----------|-------------|-----|
| DPYSL4   | chr10:134000413-134019280 | TTD7PVmother_nt | TTD7PV_nt | OK | 1.13919 | 3.48638  | 1.61372  | 3.49036 | 5.00E-05 | 0.000948525 | yes |
| DSG2     | chr18:29078026-29136874   | TTD7PVmother_nt | TTD7PV_nt | OK | 0.61223 | 0.171982 | -1.83182 | -2.5039 | 0.00045  | 0.0062912   | yes |
| DSP      | chr6:7541869-7586946      | TTD7PVmother_nt | TTD7PV_nt | OK | 29.8184 | 9.18863  | -1.69828 | -4.8208 | 5.00E-05 | 0.000948525 | yes |
| DUSP4    | chr8:29190578-29208267    | TTD7PVmother_nt | TTD7PV_nt | OK | 4.72581 | 0.344437 | -3.77825 | -7.5601 | 5.00E-05 | 0.000948525 | yes |
| DYNC1I1  | chr7:95401817-95727736    | TTD7PVmother_nt | TTD7PV_nt | OK | 1.01322 | 0.153909 | -2.71881 | -3.4253 | 5.00E-05 | 0.000948525 | yes |
| DYSF     | chr2:71680752-71913893    | TTD7PVmother_nt | TTD7PV_nt | OK | 0.45991 | 0.129289 | -1.83075 | -2.1849 | 5.00E-05 | 0.000948525 | yes |
| EBF2     | chr8:25699245-25902640    | TTD7PVmother_nt | TTD7PV_nt | OK | 1.20091 | 0.028016 | -5.42175 | -5.1294 | 0.00035  | 0.00513307  | yes |
| EBF3     | chr10:131633495-131762091 | TTD7PVmother_nt | TTD7PV_nt | OK | 5.0608  | 1.81102  | -1.48256 | -3.8887 | 5.00E-05 | 0.000948525 | yes |
| ECHDC3   | chr10:11784355-11806065   | TTD7PVmother_nt | TTD7PV_nt | OK | 0.7219  | 0.110715 | -2.70494 | -3.0776 | 0.00165  | 0.0180615   | yes |
| EDIL3    | chr5:83238125-83680611    | TTD7PVmother_nt | TTD7PV_nt | OK | 45.0334 | 7.21128  | -2.64267 | -6.8854 | 5.00E-05 | 0.000948525 | yes |
| EFCAB4B  | chr12:3724493-3862366     | TTD7PVmother_nt | TTD7PV_nt | OK | 1.12684 | 0.186466 | -2.5953  | -2.9131 | 0.0001   | 0.00172182  | yes |
| EGR1     | chr5:137801180-137805004  | TTD7PVmother_nt | TTD7PV_nt | OK | 8.55274 | 17.8459  | 1.06114  | 3.27667 | 5.00E-05 | 0.000948525 | yes |
| EGR2     | chr10:64571755-64578927   | TTD7PVmother_nt | TTD7PV_nt | OK | 0.69504 | 1.66247  | 1.25816  | 2.01344 | 0.0005   | 0.00687807  | yes |
| ELFN2    | chr22:37763999-37823505   | TTD7PVmother_nt | TTD7PV_nt | OK | 0.24343 | 0.568221 | 1.22297  | 2.20873 | 0.0003   | 0.00450245  | yes |
| ELN      | chr7:73442426-73484236    | TTD7PVmother_nt | TTD7PV_nt | OK | 330.566 | 485.13   | 1.44845  | 1.12473 | 5.00E-05 | 0.000948525 | yes |
| ELOVL2   | chr6:10980992-11079377    | TTD7PVmother_nt | TTD7PV_nt | OK | 0.24348 | 0.633873 | 1.38039  | 2.25727 | 0.0013   | 0.0149558   | yes |
| ENO3     | chr17:4854383-4860426     | TTD7PVmother_nt | TTD7PV_nt | OK | 1.79051 | 0.804988 | -1.15333 | -1.6543 | 0.00305  | 0.0293851   | yes |
| ENPP5    | chr6:46127761-46138717    | TTD7PVmother_nt | TTD7PV_nt | OK | 3.12085 | 1.23118  | -1.3419  | -2.9847 | 5.00E-05 | 0.000948525 | yes |
| EPB41L4A | chr5:111498314-111755010  | TTD7PVmother_nt | TTD7PV_nt | OK | 1.75277 | 0.854328 | -1.03677 | -2.3018 | 0.00065  | 0.00852222  | yes |
| EPDR1    | chr7:37960162-37991542    | TTD7PVmother_nt | TTD7PV_nt | OK | 22.1785 | 1.59463  | -3.79787 | -8.5424 | 5.00E-05 | 0.000948525 | yes |
| EPHA3    | chr3:89156673-89531284    | TTD7PVmother_nt | TTD7PV_nt | OK | 0.08648 | 0.596553 | 2.78626  | 3.47021 | 5.00E-05 | 0.000948525 | yes |
| EPS8L2   | chr11:706119-727727       | TTD7PVmother_nt | TTD7PV_nt | OK | 28.8343 | 13.8637  | -1.05648 | -3.5951 | 5.00E-05 | 0.000948525 | yes |
| ERG      | chr21:39739182-40033704   | TTD7PVmother_nt | TTD7PV_nt | OK | 1.16225 | 0.383374 | -1.6001  | -2.1327 | 0.00045  | 0.0062912   | yes |
| ESPNL    | chr2:239008950-239041928  | TTD7PVmother_nt | TTD7PV_nt | OK | 0.07623 | 0.814007 | 3.41667  | 4.52478 | 5.00E-05 | 0.000948525 | yes |
| ESYT3    | chr3:138153414-138197256  | TTD7PVmother_nt | TTD7PV_nt | OK | 0.76643 | 0.133506 | -2.52124 | -3.7738 | 5.00E-05 | 0.000948525 | yes |
| ETNK2    | chr1:204100189-204121307  | TTD7PVmother_nt | TTD7PV_nt | OK | 1.62395 | 0.563316 | -1.5275  | -2.7877 | 0.00015  | 0.00249264  | yes |
| EVA1C    | chr21:33784751-33887697   | TTD7PVmother_nt | TTD7PV_nt | OK | 0.82263 | 0.270863 | -1.60268 | -2.3795 | 0.00145  | 0.0163452   | yes |
| EXO1     | chr1:242011492-242053241  | TTD7PVmother_nt | TTD7PV_nt | OK | 0.80478 | 2.00504  | 1.31697  | 2.41495 | 5.00E-05 | 0.000948525 | yes |
| EXTL1    | chr1:26348270-26362954    | TTD7PVmother_nt | TTD7PV_nt | OK | 0.68811 | 0.130555 | -2.39798 | -3.5431 | 5.00E-05 | 0.000948525 | yes |
| F10      | chr13:113777112-113803843 | TTD7PVmother_nt | TTD7PV_nt | OK | 4.15645 | 0.87785  | -2.2433  | -4.3793 | 5.00E-05 | 0.000948525 | yes |
| F2R      | chr5:76011867-76031595    | TTD7PVmother_nt | TTD7PV_nt | OK | 8.08084 | 19.4563  | 1.26766  | 4.54155 | 5.00E-05 | 0.000948525 | yes |
| F3       | chr1:94994731-95007413    | TTD7PVmother_nt | TTD7PV_nt | OK | 58.6861 | 9.91232  | -2.56572 | -7.4586 | 5.00E-05 | 0.000948525 | yes |
| F8       | chrX:154064063-154250998  | TTD7PVmother_nt | TTD7PV_nt | OK | 3.73823 | 1.26515  | -1.56305 | -2.7059 | 0.0004   | 0.00575481  | yes |

|          |                           |                 |           |    |         |          |          |         |          |             |     |
|----------|---------------------------|-----------------|-----------|----|---------|----------|----------|---------|----------|-------------|-----|
| FABP3    | chr1:31838099-31845923    | TTD7PVmother_nt | TTD7PV_nt | OK | 15.8683 | 6.80987  | -1.22045 | -3.5838 | 0.0001   | 0.00172182  | yes |
| FABP5    | chr8:82192717-82197012    | TTD7PVmother_nt | TTD7PV_nt | OK | 4.32899 | 16.3202  | 1.91455  | 5.31511 | 5.00E-05 | 0.000948525 | yes |
| FAM134B  | chr5:16473146-16617167    | TTD7PVmother_nt | TTD7PV_nt | OK | 2.42536 | 0.174333 | -3.79828 | -5.5192 | 5.00E-05 | 0.000948525 | yes |
| FAM149A  | chr4:187065994-187093817  | TTD7PVmother_nt | TTD7PV_nt | OK | 2.43738 | 1.13153  | -1.10706 | -2.0676 | 0.00045  | 0.0062912   | yes |
| FAM155A  | chr13:107820878-108519460 | TTD7PVmother_nt | TTD7PV_nt | OK | 3.50781 | 1.06672  | -1.71739 | -4.0547 | 5.00E-05 | 0.000948525 | yes |
| FAM19A5  | chr22:48885287-49147744   | TTD7PVmother_nt | TTD7PV_nt | OK | 21.6462 | 10.6161  | -1.02786 | -3.1596 | 5.00E-05 | 0.000948525 | yes |
| FAM43B   | chr1:20878931-20881513    | TTD7PVmother_nt | TTD7PV_nt | OK | 0.67802 | 0.110027 | -2.62348 | -3.4369 | 0.0001   | 0.00172182  | yes |
| FAM65C   | chr20:49202646-49253426   | TTD7PVmother_nt | TTD7PV_nt | OK | 1.07887 | 0.255146 | -2.08013 | -3.4015 | 5.00E-05 | 0.000948525 | yes |
| FBLN7    | chr2:112895961-112945791  | TTD7PVmother_nt | TTD7PV_nt | OK | 7.07365 | 3.53253  | -1.00175 | -2.4981 | 5.00E-05 | 0.000948525 | yes |
| FBN2     | chr5:127593600-127873735  | TTD7PVmother_nt | TTD7PV_nt | OK | 4.36478 | 28.6774  | 2.71593  | 7.81743 | 5.00E-05 | 0.000948525 | yes |
| FBXL2    | chr3:33318933-33428757    | TTD7PVmother_nt | TTD7PV_nt | OK | 1.85312 | 0.400837 | -2.20887 | -3.6816 | 5.00E-05 | 0.000948525 | yes |
| FBXO32   | chr8:124510126-124553493  | TTD7PVmother_nt | TTD7PV_nt | OK | 9.85312 | 3.10949  | -1.6639  | -4.9855 | 5.00E-05 | 0.000948525 | yes |
| FBXO41   | chr2:73481809-73496758    | TTD7PVmother_nt | TTD7PV_nt | OK | 0.89862 | 0.149706 | -2.58557 | -4.4417 | 5.00E-05 | 0.000948525 | yes |
| FERMT1   | chr20:6055491-6104191     | TTD7PVmother_nt | TTD7PV_nt | OK | 0.62334 | 1.27602  | 1.03356  | 2.14204 | 0.00065  | 0.00852222  | yes |
| FGD4     | chr12:32655040-32798984   | TTD7PVmother_nt | TTD7PV_nt | OK | 1.31883 | 0.577728 | -1.1908  | -2.7695 | 5.00E-05 | 0.000948525 | yes |
| FGF1     | chr5:141971742-142077635  | TTD7PVmother_nt | TTD7PV_nt | OK | 5.14346 | 1.67153  | -1.62157 | -3.878  | 5.00E-05 | 0.000948525 | yes |
| FGF18    | chr5:170846666-170884630  | TTD7PVmother_nt | TTD7PV_nt | OK | 0.33966 | 0.84662  | 1.31764  | 1.87711 | 0.00545  | 0.0464532   | yes |
| FGF7     | chr15:49447975-49913118   | TTD7PVmother_nt | TTD7PV_nt | OK | 92.1881 | 44.8865  | -1.0383  | -3.2678 | 5.00E-05 | 0.000948525 | yes |
| FGFR3    | chr4:1795038-1810599      | TTD7PVmother_nt | TTD7PV_nt | OK | 0.46864 | 1.08816  | 1.21532  | 2.06754 | 0.0006   | 0.00798882  | yes |
| FGL2     | chr7:76751933-76924521    | TTD7PVmother_nt | TTD7PV_nt | OK | 3.75638 | 10.8943  | 1.53615  | 4.16542 | 5.00E-05 | 0.000948525 | yes |
| FIBCD1   | chr9:133777824-133814455  | TTD7PVmother_nt | TTD7PV_nt | OK | 1.14477 | 0.507702 | -1.173   | -1.9871 | 0.00115  | 0.0134589   | yes |
| FIBIN    | chr11:27015627-27018632   | TTD7PVmother_nt | TTD7PV_nt | OK | 9.56169 | 21.3313  | 1.15763  | 3.96774 | 5.00E-05 | 0.000948525 | yes |
| FKBP1B   | chr2:24272583-24286550    | TTD7PVmother_nt | TTD7PV_nt | OK | 4.34164 | 1.9867   | -1.12786 | -1.8007 | 0.00185  | 0.0197466   | yes |
| FKBP9L   | chr7:55748766-55772260    | TTD7PVmother_nt | TTD7PV_nt | OK | 7.75303 | 3.37197  | -1.20117 | -2.9706 | 5.00E-05 | 0.000948525 | yes |
| FLG      | chr1:152274650-152297679  | TTD7PVmother_nt | TTD7PV_nt | OK | 0.7926  | 0.10417  | -2.92766 | -4.3205 | 5.00E-05 | 0.000948525 | yes |
| FLJ46906 | chr6:139012804-139018425  | TTD7PVmother_nt | TTD7PV_nt | OK | 1.09233 | 2.95931  | 1.43785  | 2.88687 | 0.00105  | 0.0124816   | yes |
| FLRT3    | chr20:13976145-16033841   | TTD7PVmother_nt | TTD7PV_nt | OK | 1.33228 | 2.7221   | 1.03082  | 2.27126 | 0.0011   | 0.0129681   | yes |
| FMNL1    | chr17:43299291-43324683   | TTD7PVmother_nt | TTD7PV_nt | OK | 1.1098  | 0.424805 | -1.38543 | -2.5044 | 5.00E-05 | 0.000948525 | yes |
| FNDC1    | chr6:159590428-159693140  | TTD7PVmother_nt | TTD7PV_nt | OK | 18.649  | 8.11799  | -1.1999  | -3.0466 | 5.00E-05 | 0.000948525 | yes |
| FNDC4    | chr2:27714749-27718126    | TTD7PVmother_nt | TTD7PV_nt | OK | 15.6446 | 7.49226  | -1.06219 | -3.3563 | 5.00E-05 | 0.000948525 | yes |
| FNIP2    | chr4:159690181-159956333  | TTD7PVmother_nt | TTD7PV_nt | OK | 9.28021 | 4.27143  | -1.11944 | -3.4489 | 5.00E-05 | 0.000948525 | yes |
| FOLR3    | chr11:71846770-71850934   | TTD7PVmother_nt | TTD7PV_nt | OK | 11.7492 | 3.17852  | -1.88613 | -4.8334 | 5.00E-05 | 0.000948525 | yes |
| FOS      | chr14:75745480-75748937   | TTD7PVmother_nt | TTD7PV_nt | OK | 5.32061 | 1.82869  | -1.54078 | -3.5537 | 5.00E-05 | 0.000948525 | yes |

|          |                             |                 |           |    |         |          |          |         |          |             |     |
|----------|-----------------------------|-----------------|-----------|----|---------|----------|----------|---------|----------|-------------|-----|
| FOSB     | chr19:45971252-45978437     | TTD7PVmother_nt | TTD7PV_nt | OK | 1.4398  | 0.6117   | -1.23498 | -2.1839 | 0.0006   | 0.00798882  | yes |
| FOXL2    | chr3:138663065-138665982    | TTD7PVmother_nt | TTD7PV_nt | OK | 1.92837 | 0.456671 | -2.07815 | -4.1549 | 5.00E-05 | 0.000948525 | yes |
| FRG1B    | chr20:29611878-29634007     | TTD7PVmother_nt | TTD7PV_nt | OK | 4.34744 | 9.29883  | 1.09688  | 2.90164 | 0.00035  | 0.00513307  | yes |
| FRY      | chr13:32605436-32870776     | TTD7PVmother_nt | TTD7PV_nt | OK | 1.06818 | 0.493409 | -1.1143  | -2.587  | 5.00E-05 | 0.000948525 | yes |
| FZD5     | chr2:208627309-208634143    | TTD7PVmother_nt | TTD7PV_nt | OK | 0.50672 | 0.230313 | -1.13758 | -2.029  | 0.0014   | 0.015879    | yes |
| GABBR1   | chr6_qbl_hap6:873335-904294 | TTD7PVmother_nt | TTD7PV_nt | OK | 6.49831 | 3.21517  | -1.01517 | -2.8882 | 5.00E-05 | 0.000948525 | yes |
| GABBR2   | chr9:101050363-101471479    | TTD7PVmother_nt | TTD7PV_nt | OK | 2.47851 | 0.631132 | -1.97346 | -4.3226 | 5.00E-05 | 0.000948525 | yes |
| GABRA5   | chr15:27111865-27194357     | TTD7PVmother_nt | TTD7PV_nt | OK | 0.77418 | 0.065732 | -3.55799 | -3.3644 | 0.0001   | 0.00172182  | yes |
| GAD1     | chr2:171673199-171717659    | TTD7PVmother_nt | TTD7PV_nt | OK | 0.78489 | 0.106087 | -2.88724 | -2.8257 | 5.00E-05 | 0.000948525 | yes |
| GALNT14  | chr2:31133330-31361592      | TTD7PVmother_nt | TTD7PV_nt | OK | 0.28737 | 2.28792  | 2.99304  | 4.19609 | 5.00E-05 | 0.000948525 | yes |
| GALNT15  | chr3:16216183-16271253      | TTD7PVmother_nt | TTD7PV_nt | OK | 15.3855 | 4.66169  | -1.72265 | -5.453  | 5.00E-05 | 0.000948525 | yes |
| GALNT5   | chr2:158114339-158167913    | TTD7PVmother_nt | TTD7PV_nt | OK | 33.5112 | 80.1815  | 1.25863  | 3.6449  | 5.00E-05 | 0.000948525 | yes |
| GALNT6   | chr12:51745832-51909547     | TTD7PVmother_nt | TTD7PV_nt | OK | 3.28416 | 1.37237  | -1.25885 | -2.2769 | 0.00075  | 0.0095227   | yes |
| GAS5     | chr1:173832385-173837125    | TTD7PVmother_nt | TTD7PV_nt | OK | 169.473 | 339.352  | 1.00172  | 3.0252  | 5.00E-05 | 0.000948525 | yes |
| GAS6     | chr13:114518582-114567046   | TTD7PVmother_nt | TTD7PV_nt | OK | 790.21  | 244.887  | -1.69012 | -3.4674 | 5.00E-05 | 0.000948525 | yes |
| GATS     | chr7:99775537-99869855      | TTD7PVmother_nt | TTD7PV_nt | OK | 4.84721 | 2.36445  | -1.03565 | -2.6865 | 5.00E-05 | 0.000948525 | yes |
| GCNT3    | chr15:59903981-59912210     | TTD7PVmother_nt | TTD7PV_nt | OK | 0.5245  | 0.058238 | -3.17092 | -2.9862 | 0.00215  | 0.022301    | yes |
| GCNT4    | chr5:74323288-74326724      | TTD7PVmother_nt | TTD7PV_nt | OK | 1.86851 | 0.567581 | -1.71899 | -3.5028 | 5.00E-05 | 0.000948525 | yes |
| GDF10    | chr10:48425787-48439138     | TTD7PVmother_nt | TTD7PV_nt | OK | 0.93047 | 1.8903   | 1.02258  | 2.05052 | 0.0026   | 0.0259234   | yes |
| GDF15    | chr19:18496967-18499986     | TTD7PVmother_nt | TTD7PV_nt | OK | 30.3155 | 14.4804  | -1.06595 | -3.0808 | 5.00E-05 | 0.000948525 | yes |
| GDF5     | chr20:34021148-34026027     | TTD7PVmother_nt | TTD7PV_nt | OK | 10.3226 | 4.48364  | -1.20306 | -3.3653 | 5.00E-05 | 0.000948525 | yes |
| GFRA1    | chr10:117816441-118033126   | TTD7PVmother_nt | TTD7PV_nt | OK | 2.18869 | 5.36296  | 1.29296  | 3.79526 | 5.00E-05 | 0.000948525 | yes |
| GGT5     | chr22:24615621-24641110     | TTD7PVmother_nt | TTD7PV_nt | OK | 0.81188 | 0.210002 | -1.95087 | -2.4624 | 0.00025  | 0.00388815  | yes |
| GJA3     | chr13:20712394-20735183     | TTD7PVmother_nt | TTD7PV_nt | OK | 1.23498 | 0.337241 | -1.87264 | -3.6555 | 5.00E-05 | 0.000948525 | yes |
| GNAZ     | chr22:23401592-23484241     | TTD7PVmother_nt | TTD7PV_nt | OK | 1.07589 | 0.088071 | -3.61072 | -4.2171 | 5.00E-05 | 0.000948525 | yes |
| GNG11    | chr7:93551015-93555826      | TTD7PVmother_nt | TTD7PV_nt | OK | 75.7119 | 33.454   | -1.17834 | -4.8927 | 5.00E-05 | 0.000948525 | yes |
| GOLGA6L4 | chr15:84904524-84914120     | TTD7PVmother_nt | TTD7PV_nt | OK | 0.6362  | 0.233077 | -1.44868 | -2.3444 | 0.00075  | 0.0095227   | yes |
| GPC3     | chrX:132669775-133119673    | TTD7PVmother_nt | TTD7PV_nt | OK | 0.16337 | 0.469677 | 1.52351  | 1.63877 | 0.0026   | 0.0259234   | yes |
| GPR155   | chr2:175296299-175351816    | TTD7PVmother_nt | TTD7PV_nt | OK | 0.76518 | 0.332918 | -1.20063 | -2.3408 | 0.00025  | 0.00388815  | yes |
| GPR68    | chr14:91698875-91720224     | TTD7PVmother_nt | TTD7PV_nt | OK | 16.4743 | 7.05667  | -1.22315 | -3.4787 | 5.00E-05 | 0.000948525 | yes |
| GPRC5A   | chr12:13043955-13066600     | TTD7PVmother_nt | TTD7PV_nt | OK | 6.44185 | 3.14992  | -1.03216 | -2.8608 | 5.00E-05 | 0.000948525 | yes |
| GPRC5B   | chr16:19870292-19896151     | TTD7PVmother_nt | TTD7PV_nt | OK | 5.55768 | 2.42361  | -1.19732 | -3.1391 | 5.00E-05 | 0.000948525 | yes |
| GPX3     | chr5:150399998-150408554    | TTD7PVmother_nt | TTD7PV_nt | OK | 18.8528 | 0.849734 | -4.47162 | -9.2642 | 5.00E-05 | 0.000948525 | yes |

|          |                           |                 |           |    |         |          |          |         |          |             |     |
|----------|---------------------------|-----------------|-----------|----|---------|----------|----------|---------|----------|-------------|-----|
| GRHL1    | chr2:10091791-10142412    | TTD7PVmother_nt | TTD7PV_nt | OK | 0.84176 | 0.122426 | -2.7815  | -3.9663 | 5.00E-05 | 0.000948525 | yes |
| GRID1    | chr10:87337487-88126250   | TTD7PVmother_nt | TTD7PV_nt | OK | 0.79508 | 0.06696  | -3.56972 | -4.7202 | 5.00E-05 | 0.000948525 | yes |
| GRIK2    | chr6:101846860-102517958  | TTD7PVmother_nt | TTD7PV_nt | OK | 3.39195 | 0.147772 | -4.52067 | -7.3383 | 5.00E-05 | 0.000948525 | yes |
| GRIN3A   | chr9:104331633-104500862  | TTD7PVmother_nt | TTD7PV_nt | OK | 0.17057 | 1.43853  | 3.07616  | 5.47472 | 5.00E-05 | 0.000948525 | yes |
| GSTM5    | chr1:110254863-110260890  | TTD7PVmother_nt | TTD7PV_nt | OK | 0.53712 | 2.41042  | 2.16597  | 3.79535 | 5.00E-05 | 0.000948525 | yes |
| GYPC     | chr2:127413510-127454251  | TTD7PVmother_nt | TTD7PV_nt | OK | 41.8647 | 16.8023  | -1.31707 | -3.7814 | 5.00E-05 | 0.000948525 | yes |
| H19      | chr11:2016405-2019065     | TTD7PVmother_nt | TTD7PV_nt | OK | 0.85793 | 9.55947  | 3.478    | 6.12481 | 5.00E-05 | 0.000948525 | yes |
| HAND2    | chr4:174447651-174451378  | TTD7PVmother_nt | TTD7PV_nt | OK | 10.4133 | 1.17257  | -3.15068 | -7.5887 | 5.00E-05 | 0.000948525 | yes |
| HAPLN1   | chr5:82934016-83016896    | TTD7PVmother_nt | TTD7PV_nt | OK | 23.8686 | 1.23576  | -4.27164 | -9.3513 | 5.00E-05 | 0.000948525 | yes |
| HAPLN3   | chr15:89420518-89438770   | TTD7PVmother_nt | TTD7PV_nt | OK | 16.1395 | 4.21032  | -1.93859 | -5.8527 | 5.00E-05 | 0.000948525 | yes |
| HECW1    | chr7:43152197-43602938    | TTD7PVmother_nt | TTD7PV_nt | OK | 0.63125 | 0.131808 | -2.25978 | -3.5354 | 5.00E-05 | 0.000948525 | yes |
| HERC2P7  | chr15:23390721-23393943   | TTD7PVmother_nt | TTD7PV_nt | OK | 2.77055 | 1.15038  | -1.26806 | -2.7284 | 0.00035  | 0.00513307  | yes |
| HHEX     | chr10:94449680-94455408   | TTD7PVmother_nt | TTD7PV_nt | OK | 0.11864 | 0.582709 | 2.2962   | 2.72326 | 0.00175  | 0.0188513   | yes |
| HIST1H1C | chr6:26055967-26056699    | TTD7PVmother_nt | TTD7PV_nt | OK | 35.1128 | 14.204   | -1.3057  | -5.0019 | 5.00E-05 | 0.000948525 | yes |
| HIST1H4H | chr6:26285353-26285727    | TTD7PVmother_nt | TTD7PV_nt | OK | 8.48299 | 2.64361  | -1.68207 | -6.5777 | 0.00535  | 0.0458439   | yes |
| HK2      | chr2:75059781-75120481    | TTD7PVmother_nt | TTD7PV_nt | OK | 11.1967 | 3.72265  | -1.58867 | -5.0917 | 5.00E-05 | 0.000948525 | yes |
| HOXB7    | chr17:46684594-46688383   | TTD7PVmother_nt | TTD7PV_nt | OK | 15.2452 | 7.61603  | -1.00124 | -3.1624 | 5.00E-05 | 0.000948525 | yes |
| HOXB8    | chr17:46689707-46692301   | TTD7PVmother_nt | TTD7PV_nt | OK | 7.69321 | 0.418615 | -4.19989 | -8.0846 | 5.00E-05 | 0.000948525 | yes |
| HOXB9    | chr17:46698518-46703835   | TTD7PVmother_nt | TTD7PV_nt | OK | 0.72046 | 0.041774 | -4.10824 | -3.534  | 0.0015   | 0.0167911   | yes |
| HOXC10   | chr12:54378945-54384062   | TTD7PVmother_nt | TTD7PV_nt | OK | 24.8345 | 0.110238 | -7.81558 | -10.045 | 5.00E-05 | 0.000948525 | yes |
| HOXC9    | chr12:54393876-54397120   | TTD7PVmother_nt | TTD7PV_nt | OK | 16.7038 | 4.74321  | -1.81625 | -5.4818 | 5.00E-05 | 0.000948525 | yes |
| HR       | chr8:21971931-21988565    | TTD7PVmother_nt | TTD7PV_nt | OK | 0.63745 | 0.299397 | -1.09026 | -1.8021 | 0.0022   | 0.0226734   | yes |
| HS3ST2   | chr16:22825859-22927659   | TTD7PVmother_nt | TTD7PV_nt | OK | 0.80584 | 0.106895 | -2.91429 | -3.4516 | 0.0003   | 0.00450245  | yes |
| HS3ST3B1 | chr17:14204505-14249492   | TTD7PVmother_nt | TTD7PV_nt | OK | 5.86224 | 2.7203   | -1.10768 | -2.5585 | 0.0005   | 0.00687807  | yes |
| HSD11B1  | chr1:209859524-209908295  | TTD7PVmother_nt | TTD7PV_nt | OK | 1.48208 | 0.442339 | -1.7444  | -2.2227 | 0.0003   | 0.00450245  | yes |
| HSD17B14 | chr19:49316273-49339934   | TTD7PVmother_nt | TTD7PV_nt | OK | 24.1979 | 11.7447  | -1.04287 | -3.4888 | 5.00E-05 | 0.000948525 | yes |
| HSD3B7   | chr16:30996518-31000473   | TTD7PVmother_nt | TTD7PV_nt | OK | 35.2424 | 14.3694  | -1.29432 | -3.9217 | 5.00E-05 | 0.000948525 | yes |
| HSPA2    | chr14:65007185-65009954   | TTD7PVmother_nt | TTD7PV_nt | OK | 16.4141 | 4.16409  | -1.97886 | -5.6697 | 5.00E-05 | 0.000948525 | yes |
| HSPA6    | chr1:161494035-161496687  | TTD7PVmother_nt | TTD7PV_nt | OK | 2.19264 | 0.068981 | -4.99032 | -5.5803 | 5.00E-05 | 0.000948525 | yes |
| HSPB7    | chr1:16340522-16345285    | TTD7PVmother_nt | TTD7PV_nt | OK | 257.096 | 116.842  | -1.13775 | -3.0822 | 5.00E-05 | 0.000948525 | yes |
| HSPB8    | chr12:119616594-119632551 | TTD7PVmother_nt | TTD7PV_nt | OK | 20.0821 | 7.49902  | -1.42113 | -4.7157 | 5.00E-05 | 0.000948525 | yes |
| HTR2A    | chr13:47405676-47471211   | TTD7PVmother_nt | TTD7PV_nt | OK | 0.80671 | 0.218805 | -1.8824  | -3.2202 | 5.00E-05 | 0.000948525 | yes |
| HTRA3    | chr4:8271488-8308838      | TTD7PVmother_nt | TTD7PV_nt | OK | 23.0782 | 56.3384  | 1.28759  | 4.40009 | 5.00E-05 | 0.000948525 | yes |

|         |                           |                 |           |    |         |          |          |         |          |             |     |
|---------|---------------------------|-----------------|-----------|----|---------|----------|----------|---------|----------|-------------|-----|
| ICAM1   | chr19:10381516-10397291   | TTD7PVmother_nt | TTD7PV_nt | OK | 6.9936  | 1.5962   | -2.13139 | -5.2844 | 5.00E-05 | 0.000948525 | yes |
| ICAM5   | chr19:10400654-10407454   | TTD7PVmother_nt | TTD7PV_nt | OK | 1.00979 | 0.25328  | -1.99524 | -3.1213 | 5.00E-05 | 0.000948525 | yes |
| IFI44   | chr1:79115476-79129763    | TTD7PVmother_nt | TTD7PV_nt | OK | 1.944   | 4.09734  | 1.07566  | 2.44    | 0.00095  | 0.0115056   | yes |
| IFIT1   | chr10:91152302-91166244   | TTD7PVmother_nt | TTD7PV_nt | OK | 5.69403 | 2.44214  | -1.22131 | -3.2587 | 5.00E-05 | 0.000948525 | yes |
| IGDCC4  | chr15:65673824-65715410   | TTD7PVmother_nt | TTD7PV_nt | OK | 0.56032 | 3.17095  | 2.5006   | 5.72842 | 5.00E-05 | 0.000948525 | yes |
| IGF2BP1 | chr17:47074773-47133507   | TTD7PVmother_nt | TTD7PV_nt | OK | 0.54057 | 1.21823  | 1.17224  | 2.53895 | 0.0001   | 0.00172182  | yes |
| IGFBP2  | chr2:217498126-217529158  | TTD7PVmother_nt | TTD7PV_nt | OK | 0.94005 | 4.74227  | 2.33478  | 4.75606 | 5.00E-05 | 0.000948525 | yes |
| IGFBP4  | chr17:38599675-38613982   | TTD7PVmother_nt | TTD7PV_nt | OK | 768.21  | 345.982  | -1.1508  | -2.8211 | 0.0001   | 0.00172182  | yes |
| IGFBP5  | chr2:217536827-217560272  | TTD7PVmother_nt | TTD7PV_nt | OK | 9.36631 | 3.53405  | -1.40616 | -4.1278 | 5.00E-05 | 0.000948525 | yes |
| IGSF10  | chr3:150804675-151176497  | TTD7PVmother_nt | TTD7PV_nt | OK | 1.18269 | 4.85776  | 2.03822  | 3.98113 | 5.00E-05 | 0.000948525 | yes |
| IL13RA2 | chrX:114238537-114252207  | TTD7PVmother_nt | TTD7PV_nt | OK | 56.0154 | 8.62458  | -2.6993  | -8.8586 | 5.00E-05 | 0.000948525 | yes |
| IL15    | chr4:142557748-142655140  | TTD7PVmother_nt | TTD7PV_nt | OK | 0.87927 | 0.328271 | -1.42142 | -2.035  | 0.0023   | 0.0235343   | yes |
| IL18R1  | chr2:102979096-103015217  | TTD7PVmother_nt | TTD7PV_nt | OK | 0.46358 | 2.20255  | 2.24828  | 4.31249 | 5.00E-05 | 0.000948525 | yes |
| IL1RL1  | chr2:102927961-102968497  | TTD7PVmother_nt | TTD7PV_nt | OK | 2.3623  | 16.3689  | 2.79269  | 6.4427  | 5.00E-05 | 0.000948525 | yes |
| IL2ORB  | chr3:136676706-136729926  | TTD7PVmother_nt | TTD7PV_nt | OK | 20.1137 | 4.62504  | -2.12064 | -6.3401 | 5.00E-05 | 0.000948525 | yes |
| IL33    | chr9:6215785-6257983      | TTD7PVmother_nt | TTD7PV_nt | OK | 11.2777 | 3.21289  | -1.81153 | -4.5534 | 5.00E-05 | 0.000948525 | yes |
| IL6     | chr7:22766765-22771621    | TTD7PVmother_nt | TTD7PV_nt | OK | 5.94034 | 2.2063   | -1.42892 | -3.2039 | 0.00015  | 0.00249264  | yes |
| IL7     | chr8:79645006-79717758    | TTD7PVmother_nt | TTD7PV_nt | OK | 1.95142 | 0.934782 | -1.06182 | -1.827  | 0.0026   | 0.0259234   | yes |
| IL7R    | chr5:35856976-35879705    | TTD7PVmother_nt | TTD7PV_nt | OK | 3.70054 | 7.66083  | 1.04976  | 3.15065 | 5.00E-05 | 0.000948525 | yes |
| INA     | chr10:105036919-105050108 | TTD7PVmother_nt | TTD7PV_nt | OK | 0.73838 | 0.235315 | -1.64977 | -2.6094 | 0.0003   | 0.00450245  | yes |
| INMT    | chr7:30791750-30932002    | TTD7PVmother_nt | TTD7PV_nt | OK | 1.83007 | 0.388244 | -2.23686 | -2.1953 | 0.0029   | 0.028236    | yes |
| IQCA1   | chr2:237232789-237416178  | TTD7PVmother_nt | TTD7PV_nt | OK | 0.62823 | 0.21043  | -1.57796 | -2.0788 | 0.00045  | 0.0062912   | yes |
| ISG15   | chr1:948846-949919        | TTD7PVmother_nt | TTD7PV_nt | OK | 12.2216 | 26.0321  | 1.09086  | 4.04014 | 5.00E-05 | 0.000948525 | yes |
| ISM1    | chr20:13202417-13281297   | TTD7PVmother_nt | TTD7PV_nt | OK | 4.66611 | 2.22973  | -1.06535 | -2.2555 | 0.0001   | 0.00172182  | yes |
| ITGA10  | chr1:145524989-145543868  | TTD7PVmother_nt | TTD7PV_nt | OK | 0.60548 | 0.234201 | -1.37034 | -2.2647 | 0.0009   | 0.0110351   | yes |
| ITGA3   | chr17:48133339-48167849   | TTD7PVmother_nt | TTD7PV_nt | OK | 12.1512 | 5.118    | -1.24744 | -3.6697 | 5.00E-05 | 0.000948525 | yes |
| ITGA7   | chr12:56075329-56106089   | TTD7PVmother_nt | TTD7PV_nt | OK | 8.32793 | 1.81066  | -2.20144 | -5.4163 | 5.00E-05 | 0.000948525 | yes |
| ITGB3   | chr17:45331207-45390077   | TTD7PVmother_nt | TTD7PV_nt | OK | 18.8729 | 4.59609  | -2.03784 | -6.2251 | 5.00E-05 | 0.000948525 | yes |
| ITGB8   | chr7:20370724-20455382    | TTD7PVmother_nt | TTD7PV_nt | OK | 2.9509  | 0.901699 | -1.71044 | -4.8655 | 5.00E-05 | 0.000948525 | yes |
| ITIH5   | chr10:7601231-7708961     | TTD7PVmother_nt | TTD7PV_nt | OK | 0.70628 | 4.35108  | 2.62306  | 5.15285 | 5.00E-05 | 0.000948525 | yes |
| ITPR3   | chr6:33589155-33664348    | TTD7PVmother_nt | TTD7PV_nt | OK | 25.8812 | 8.79843  | -1.55659 | -4.6488 | 5.00E-05 | 0.000948525 | yes |
| IZUMO4  | chr19:2096867-2099583     | TTD7PVmother_nt | TTD7PV_nt | OK | 1.29654 | 0.375371 | -1.78828 | -1.8716 | 0.0027   | 0.0267134   | yes |
| JAM2    | chr21:27011593-27089874   | TTD7PVmother_nt | TTD7PV_nt | OK | 4.66195 | 0.913697 | -2.35115 | -4.2139 | 5.00E-05 | 0.000948525 | yes |

|           |                           |                 |           |    |         |          |          |         |          |             |     |
|-----------|---------------------------|-----------------|-----------|----|---------|----------|----------|---------|----------|-------------|-----|
| JPH2      | chr20:42740336-42816218   | TTD7PVmother_nt | TTD7PV_nt | OK | 3.34052 | 0.45009  | -2.89179 | -5.3749 | 5.00E-05 | 0.000948525 | yes |
| JUP       | chr17:39910858-39942964   | TTD7PVmother_nt | TTD7PV_nt | OK | 4.20622 | 0.951185 | -2.14473 | -4.3732 | 5.00E-05 | 0.000948525 | yes |
| KALRN     | chr3:123813557-124440036  | TTD7PVmother_nt | TTD7PV_nt | OK | 1.08819 | 0.303856 | -1.84046 | -2.7969 | 5.00E-05 | 0.000948525 | yes |
| KAZALD1   | chr10:102820998-102825351 | TTD7PVmother_nt | TTD7PV_nt | OK | 7.49039 | 20.1222  | 1.42568  | 4.62469 | 5.00E-05 | 0.000948525 | yes |
| KBTBD11   | chr8:1922043-1955109      | TTD7PVmother_nt | TTD7PV_nt | OK | 0.58504 | 1.88283  | 1.68629  | 4.03919 | 5.00E-05 | 0.000948525 | yes |
| KCNG1     | chr20:49620192-49639675   | TTD7PVmother_nt | TTD7PV_nt | OK | 4.23946 | 10.5876  | 1.32042  | 3.89811 | 5.00E-05 | 0.000948525 | yes |
| KCNJ15    | chr21:39601836-39673746   | TTD7PVmother_nt | TTD7PV_nt | OK | 2.41102 | 1.019    | -1.24249 | -2.303  | 0.0001   | 0.00172182  | yes |
| KCNJ2-AS1 | chr17:68163101-68165543   | TTD7PVmother_nt | TTD7PV_nt | OK | 0.65415 | 0.155618 | -2.07161 | -2.808  | 0.0006   | 0.00798882  | yes |
| KCNJ6     | chr21:38996784-39288741   | TTD7PVmother_nt | TTD7PV_nt | OK | 0.68231 | 0.116013 | -2.55614 | -3.1889 | 0.00025  | 0.00388815  | yes |
| KCNJ8     | chr12:21917888-21927755   | TTD7PVmother_nt | TTD7PV_nt | OK | 9.50187 | 3.51471  | -1.4348  | -4.106  | 5.00E-05 | 0.000948525 | yes |
| KCNK1     | chr1:233749749-233808258  | TTD7PVmother_nt | TTD7PV_nt | OK | 10.3883 | 3.21211  | -1.69337 | -4.2656 | 5.00E-05 | 0.000948525 | yes |
| KCNK6     | chr19:38810483-38819649   | TTD7PVmother_nt | TTD7PV_nt | OK | 9.53748 | 3.76905  | -1.33941 | -3.8494 | 5.00E-05 | 0.000948525 | yes |
| KCNMB4    | chr12:70760061-70828072   | TTD7PVmother_nt | TTD7PV_nt | OK | 0.81503 | 0.241306 | -1.75599 | -3.1146 | 5.00E-05 | 0.000948525 | yes |
| KCNQ3     | chr8:133133104-133493004  | TTD7PVmother_nt | TTD7PV_nt | OK | 0.56057 | 0.238229 | -1.23455 | -2.346  | 0.0001   | 0.00172182  | yes |
| KCNS2     | chr8:99439249-99443023    | TTD7PVmother_nt | TTD7PV_nt | OK | 1.00897 | 0.180936 | -2.47933 | -3.7207 | 5.00E-05 | 0.000948525 | yes |
| KCNS3     | chr2:18059944-18114225    | TTD7PVmother_nt | TTD7PV_nt | OK | 3.2702  | 1.55555  | -1.07195 | -2.3839 | 0.0007   | 0.00906687  | yes |
| KIAA0226L | chr13:46916136-46961635   | TTD7PVmother_nt | TTD7PV_nt | OK | 1.04036 | 0.429272 | -1.27712 | -2.3359 | 0.00035  | 0.00513307  | yes |
| KIAA1161  | chr9:34368906-34376894    | TTD7PVmother_nt | TTD7PV_nt | OK | 0.92017 | 0.320864 | -1.51994 | -2.7593 | 5.00E-05 | 0.000948525 | yes |
| KIAA1211  | chr4:57036360-57196890    | TTD7PVmother_nt | TTD7PV_nt | OK | 0.16076 | 1.47837  | 3.20104  | 5.65975 | 5.00E-05 | 0.000948525 | yes |
| KIF13B    | chr8:28924794-29120610    | TTD7PVmother_nt | TTD7PV_nt | OK | 0.46941 | 0.191664 | -1.29225 | -2.2326 | 0.0006   | 0.00798882  | yes |
| KIF17     | chr1:20990506-21044317    | TTD7PVmother_nt | TTD7PV_nt | OK | 0.52718 | 0.209562 | -1.33092 | -1.873  | 0.0016   | 0.0176494   | yes |
| KIF26B    | chr1:245318286-245866428  | TTD7PVmother_nt | TTD7PV_nt | OK | 2.05803 | 0.91452  | -1.17018 | -2.8131 | 5.00E-05 | 0.000948525 | yes |
| KIFC2     | chr8:145691737-145701718  | TTD7PVmother_nt | TTD7PV_nt | OK | 6.69306 | 2.3462   | -1.51234 | -4.1211 | 5.00E-05 | 0.000948525 | yes |
| KLHDC7B   | chr22:50986461-50989452   | TTD7PVmother_nt | TTD7PV_nt | OK | 0.26168 | 1.58158  | 2.59551  | 4.01399 | 5.00E-05 | 0.000948525 | yes |
| KLRAP1    | chr12:10741076-10752434   | TTD7PVmother_nt | TTD7PV_nt | OK | 0.92502 | 0.367189 | -1.33296 | -2.2426 | 0.00305  | 0.0293851   | yes |
| KRT14     | chr17:39738530-39743147   | TTD7PVmother_nt | TTD7PV_nt | OK | 2.8847  | 0.453511 | -2.66921 | -4.2716 | 5.00E-05 | 0.000948525 | yes |
| KRT18     | chr12:53290970-53346685   | TTD7PVmother_nt | TTD7PV_nt | OK | 9.95766 | 2.058    | -2.27457 | -2.8754 | 5.00E-05 | 0.000948525 | yes |
| KRTAP1-1  | chr17:39196810-39197713   | TTD7PVmother_nt | TTD7PV_nt | OK | 5.38525 | 1.37657  | -1.96794 | -4.4204 | 5.00E-05 | 0.000948525 | yes |
| KRTAP1-5  | chr17:39182278-39183454   | TTD7PVmother_nt | TTD7PV_nt | OK | 40.8887 | 18.2927  | -1.16044 | -4.5067 | 5.00E-05 | 0.000948525 | yes |
| KRTAP2-3  | chr17:39215492-39216344   | TTD7PVmother_nt | TTD7PV_nt | OK | 1.65916 | 7.00439  | 2.07781  | 4.80001 | 5.00E-05 | 0.000948525 | yes |
| LAMC2     | chr1:183155173-183214262  | TTD7PVmother_nt | TTD7PV_nt | OK | 1.36402 | 0.531669 | -1.35926 | -2.5625 | 5.00E-05 | 0.000948525 | yes |
| LAMP3     | chr3:182840002-182880667  | TTD7PVmother_nt | TTD7PV_nt | OK | 0.14899 | 1.4507   | 3.28342  | 4.99451 | 5.00E-05 | 0.000948525 | yes |
| LBH       | chr2:30454396-30482899    | TTD7PVmother_nt | TTD7PV_nt | OK | 59.6405 | 21.6435  | -1.46236 | -4.8117 | 5.00E-05 | 0.000948525 | yes |



|              |                           |                 |           |    |         |          |          |         |          |             |     |
|--------------|---------------------------|-----------------|-----------|----|---------|----------|----------|---------|----------|-------------|-----|
| LDLRAD4      | chr18:13218728-13652753   | TTD7PVmother_nt | TTD7PV_nt | OK | 0.60687 | 0.147922 | -2.03656 | -3.3617 | 5.00E-05 | 0.000948525 | yes |
| LDOC1        | chrX:140269930-140271310  | TTD7PVmother_nt | TTD7PV_nt | OK | 25.4025 | 3.95799  | -2.68213 | -8.059  | 5.00E-05 | 0.000948525 | yes |
| LGALS3BP     | chr17:76967334-76976061   | TTD7PVmother_nt | TTD7PV_nt | OK | 25.6728 | 4.92421  | -2.38228 | -6.9276 | 5.00E-05 | 0.000948525 | yes |
| LGR5         | chr12:71833812-71978621   | TTD7PVmother_nt | TTD7PV_nt | OK | 0.31384 | 15.4438  | 5.62086  | 10.8273 | 5.00E-05 | 0.000948525 | yes |
| LIMCH1       | chr4:41362803-41702061    | TTD7PVmother_nt | TTD7PV_nt | OK | 7.45567 | 1.90125  | -1.97139 | -4.8048 | 5.00E-05 | 0.000948525 | yes |
| LINC00312    | chr3:8613467-8616354      | TTD7PVmother_nt | TTD7PV_nt | OK | 1.52744 | 0.650137 | -1.2323  | -2.4277 | 0.00085  | 0.0105426   | yes |
| LINC00346    | chr13:111516333-111522655 | TTD7PVmother_nt | TTD7PV_nt | OK | 0.20191 | 0.552042 | 1.45107  | 2.37519 | 5.00E-05 | 0.000948525 | yes |
| LINC00472    | chr6:72124148-72130448    | TTD7PVmother_nt | TTD7PV_nt | OK | 1.22597 | 0.579016 | -1.08225 | -2.056  | 0.004    | 0.0366439   | yes |
| LINC00478    | chr21:17442841-17982094   | TTD7PVmother_nt | TTD7PV_nt | OK | 0.3837  | 0.958817 | 1.32126  | 2.21313 | 0.0007   | 0.00906687  | yes |
| LINC00578    | chr3:177159708-177470492  | TTD7PVmother_nt | TTD7PV_nt | OK | 0.71919 | 0.163282 | -2.139   | -2.4031 | 0.00315  | 0.0301678   | yes |
| LINC00607    | chr2:216476285-216708259  | TTD7PVmother_nt | TTD7PV_nt | OK | 1.01798 | 0.291548 | -1.80391 | -3.052  | 5.00E-05 | 0.000948525 | yes |
| LINC00649    | chr21:35303515-35343487   | TTD7PVmother_nt | TTD7PV_nt | OK | 0.0587  | 0.560402 | 3.25496  | 3.53108 | 0.00055  | 0.00745427  | yes |
| LINC00842    | chr10:47096453-47151400   | TTD7PVmother_nt | TTD7PV_nt | OK | 1.73917 | 0.65854  | -1.40106 | -2.4627 | 0.00025  | 0.00388815  | yes |
| LMO7         | chr13:76194569-76434006   | TTD7PVmother_nt | TTD7PV_nt | OK | 92.4079 | 43.4372  | -1.08908 | -2.8616 | 5.00E-05 | 0.000948525 | yes |
| LMOD1        | chr1:201865583-201915716  | TTD7PVmother_nt | TTD7PV_nt | OK | 6.14118 | 1.59682  | -1.94332 | -4.3258 | 5.00E-05 | 0.000948525 | yes |
| LOC100130992 | chr10:22541000-22547477   | TTD7PVmother_nt | TTD7PV_nt | OK | 0.34957 | 0.761436 | 1.12313  | 2.31152 | 0.0013   | 0.0149558   | yes |
| LOC100505695 | chr2:171627603-171634757  | TTD7PVmother_nt | TTD7PV_nt | OK | 0.63769 | 1.93389  | 1.60057  | 1.80536 | 0.0026   | 0.0259234   | yes |
| LOC146880    | chr17:62745779-62778117   | TTD7PVmother_nt | TTD7PV_nt | OK | 11.9585 | 5.16773  | -1.21043 | -3.4203 | 5.00E-05 | 0.000948525 | yes |
| LOC284344    | chr19:43715942-43752798   | TTD7PVmother_nt | TTD7PV_nt | OK | 0.67275 | 0.165767 | -2.02091 | -2.5654 | 0.0017   | 0.0184518   | yes |
| LOC285084    | chr2:175190754-175195370  | TTD7PVmother_nt | TTD7PV_nt | OK | 4.66398 | 0.162344 | -4.84444 | -7.9792 | 5.00E-05 | 0.000948525 | yes |
| LOC339524    | chr1:87595447-87634886    | TTD7PVmother_nt | TTD7PV_nt | OK | 0.91645 | 0.059642 | -3.94167 | -2.9226 | 5.00E-05 | 0.000948525 | yes |
| LOC399753    | chr10:49218158-49239658   | TTD7PVmother_nt | TTD7PV_nt | OK | 0.56938 | 0.092725 | -2.61836 | -2.9086 | 0.0006   | 0.00798882  | yes |
| LOC619207    | chr10:135267431-135281953 | TTD7PVmother_nt | TTD7PV_nt | OK | 0.75758 | 0.35043  | -1.11227 | -1.969  | 0.0021   | 0.0219061   | yes |
| LOC646329    | chr7:130565750-130598069  | TTD7PVmother_nt | TTD7PV_nt | OK | 2.96926 | 1.13048  | -1.39317 | -2.9628 | 0.0001   | 0.00172182  | yes |
| LOC654342    | chr2:91824708-91847975    | TTD7PVmother_nt | TTD7PV_nt | OK | 10.7781 | 24.5141  | 1.18551  | 4.35319 | 5.00E-05 | 0.000948525 | yes |
| LOC654433    | chr2:113973573-114036498  | TTD7PVmother_nt | TTD7PV_nt | OK | 9.12249 | 0.210792 | -5.43554 | -7.9661 | 5.00E-05 | 0.000948525 | yes |
| LPPR3        | chr19:812487-821952       | TTD7PVmother_nt | TTD7PV_nt | OK | 0.49223 | 0.159651 | -1.62442 | -1.956  | 0.00275  | 0.0271038   | yes |
| LRIG1        | chr3:66119284-66550845    | TTD7PVmother_nt | TTD7PV_nt | OK | 7.26248 | 3.2799   | -1.14681 | -2.2552 | 0.00015  | 0.00249264  | yes |
| LRRC15       | chr3:194075975-194090472  | TTD7PVmother_nt | TTD7PV_nt | OK | 101.867 | 32.8674  | -1.63195 | -4.513  | 5.00E-05 | 0.000948525 | yes |
| LRRC17       | chr7:102453307-102715288  | TTD7PVmother_nt | TTD7PV_nt | OK | 1.10886 | 2.47846  | 1.16037  | 2.01906 | 0.001    | 0.0119535   | yes |
| LRRC2        | chr3:46556877-46608040    | TTD7PVmother_nt | TTD7PV_nt | OK | 8.41973 | 3.33891  | -1.33439 | -3.8736 | 5.00E-05 | 0.000948525 | yes |
| LRRC32       | chr11:76368567-76381791   | TTD7PVmother_nt | TTD7PV_nt | OK | 105.59  | 27.0966  | -1.96229 | -4.9941 | 5.00E-05 | 0.000948525 | yes |
| LRRC8E       | chr19:7953389-7966908     | TTD7PVmother_nt | TTD7PV_nt | OK | 2.48601 | 0.64862  | -1.93839 | -3.6917 | 5.00E-05 | 0.000948525 | yes |

|          |                                |                 |           |    |         |          |          |         |          |             |     |
|----------|--------------------------------|-----------------|-----------|----|---------|----------|----------|---------|----------|-------------|-----|
| LSP1     | chr11:1874199-1913493          | TTD7PVmother_nt | TTD7PV_nt | OK | 0.88011 | 0.256582 | -1.77827 | -1.8656 | 0.00025  | 0.00388815  | yes |
| LY6K     | chr8:143781528-143808391       | TTD7PVmother_nt | TTD7PV_nt | OK | 4.86536 | 11.944   | 1.29566  | 3.36342 | 5.00E-05 | 0.000948525 | yes |
| LYN      | chr8:56792385-56925006         | TTD7PVmother_nt | TTD7PV_nt | OK | 1.65383 | 0.468952 | -1.81829 | -3.3933 | 5.00E-05 | 0.000948525 | yes |
| LYNX1    | chr8:143845755-143859640       | TTD7PVmother_nt | TTD7PV_nt | OK | 16.7011 | 6.34907  | -1.39532 | -4.0324 | 5.00E-05 | 0.000948525 | yes |
| LYPD3    | chr19:43964945-43969831        | TTD7PVmother_nt | TTD7PV_nt | OK | 0.66062 | 0.120492 | -2.45489 | -3.068  | 0.0017   | 0.0184518   | yes |
| LZTS1    | chr8:20103675-20112803         | TTD7PVmother_nt | TTD7PV_nt | OK | 0.45194 | 0.112241 | -2.00953 | -2.6589 | 5.00E-05 | 0.000948525 | yes |
| MAF      | chr16:79627744-79634622        | TTD7PVmother_nt | TTD7PV_nt | OK | 1.17365 | 2.52887  | 1.10749  | 2.24197 | 0.00025  | 0.00388815  | yes |
| MAFG-AS1 | chr17:79885704-79888629        | TTD7PVmother_nt | TTD7PV_nt | OK | 2.30515 | 5.0555   | 1.133    | 2.74032 | 0.0001   | 0.00172182  | yes |
| MAGI1    | chr3:65339905-66024509         | TTD7PVmother_nt | TTD7PV_nt | OK | 8.206   | 4.00894  | -1.03346 | -3.1306 | 5.00E-05 | 0.000948525 | yes |
| MALAT1   | chr11:65265232-65273939        | TTD7PVmother_nt | TTD7PV_nt | OK | 51.5801 | 21.7392  | -1.24652 | -3.7996 | 5.00E-05 | 0.000948525 | yes |
| MALL     | chr2:110841446-110874143       | TTD7PVmother_nt | TTD7PV_nt | OK | 11.5538 | 32.1041  | 1.47439  | 4.78913 | 5.00E-05 | 0.000948525 | yes |
| MAMDC2   | chr9:72658496-72873790         | TTD7PVmother_nt | TTD7PV_nt | OK | 0.54485 | 0.116735 | -2.22261 | -2.6101 | 0.00145  | 0.0163452   | yes |
| MAOA     | chrX:43514154-43606071         | TTD7PVmother_nt | TTD7PV_nt | OK | 1.52564 | 0.092945 | -4.03691 | -5.5764 | 5.00E-05 | 0.000948525 | yes |
| MAP6     | chr11:75297962-75379479        | TTD7PVmother_nt | TTD7PV_nt | OK | 5.7419  | 1.22381  | -2.23014 | -4.627  | 5.00E-05 | 0.000948525 | yes |
| MBOAT1   | chr6:20099915-20212695         | TTD7PVmother_nt | TTD7PV_nt | OK | 1.07774 | 0.478691 | -1.17084 | -2.0907 | 0.00085  | 0.0105426   | yes |
| MBP      | chr18:74690788-74844774        | TTD7PVmother_nt | TTD7PV_nt | OK | 3.73168 | 0.665078 | -2.48823 | -5.0526 | 5.00E-05 | 0.000948525 | yes |
| MC4R     | chr18:58038563-58040001        | TTD7PVmother_nt | TTD7PV_nt | OK | 0.67685 | 1.72642  | 1.35088  | 2.32717 | 0.00335  | 0.0318932   | yes |
| MCOLN3   | chr1:85483764-85514223         | TTD7PVmother_nt | TTD7PV_nt | OK | 1.67342 | 0.39034  | -2.1     | -3.3483 | 5.00E-05 | 0.000948525 | yes |
| MEIS3    | chr19:47906374-47922785        | TTD7PVmother_nt | TTD7PV_nt | OK | 18.3911 | 6.17029  | -1.5756  | -4.1959 | 5.00E-05 | 0.000948525 | yes |
| METTL7A  | chr12:51318533-51326300        | TTD7PVmother_nt | TTD7PV_nt | OK | 4.98964 | 2.34035  | -1.09221 | -2.9494 | 5.00E-05 | 0.000948525 | yes |
| MFAP5    | chr12:8798539-8815433          | TTD7PVmother_nt | TTD7PV_nt | OK | 259.525 | 117.617  | -1.14178 | -3.1926 | 0.0001   | 0.00172182  | yes |
| MFSD7    | chr4:671710-682973             | TTD7PVmother_nt | TTD7PV_nt | OK | 4.96355 | 0.777569 | -2.67433 | -3.3962 | 5.00E-05 | 0.000948525 | yes |
| MGARP    | chr4:140187316-140201492       | TTD7PVmother_nt | TTD7PV_nt | OK | 12.1399 | 3.15544  | -1.94384 | -4.9913 | 5.00E-05 | 0.000948525 | yes |
| MICA     | chr6_ssto_hap7:2701358-2716888 | TTD7PVmother_nt | TTD7PV_nt | OK | 27.2523 | 8.937    | -1.60852 | -4.1918 | 5.00E-05 | 0.000948525 | yes |
| MIR143HG | chr5:148786439-148812399       | TTD7PVmother_nt | TTD7PV_nt | OK | 3.65836 | 1.37019  | -1.41682 | -3.4312 | 5.00E-05 | 0.000948525 | yes |
| MIR210HG | chr11:565656-568457            | TTD7PVmother_nt | TTD7PV_nt | OK | 2.07729 | 0.374195 | -2.47284 | -3.7063 | 5.00E-05 | 0.000948525 | yes |
| MITF     | chr3:69788585-70017488         | TTD7PVmother_nt | TTD7PV_nt | OK | 1.45831 | 0.677224 | -1.10659 | -2.1045 | 0.0004   | 0.00575481  | yes |
| MKX      | chr10:27961802-28034778        | TTD7PVmother_nt | TTD7PV_nt | OK | 13.3865 | 6.47298  | -1.04827 | -3.2707 | 5.00E-05 | 0.000948525 | yes |
| MLPH     | chr2:238395877-238463961       | TTD7PVmother_nt | TTD7PV_nt | OK | 1.61998 | 0.175563 | -3.20591 | -4.6089 | 5.00E-05 | 0.000948525 | yes |
| MMD      | chr17:53469973-53499341        | TTD7PVmother_nt | TTD7PV_nt | OK | 2.93292 | 1.29803  | -1.17601 | -2.847  | 0.00035  | 0.00513307  | yes |
| MMP10    | chr11:102641232-102651359      | TTD7PVmother_nt | TTD7PV_nt | OK | 2.51968 | 0.453495 | -2.47408 | -4.1464 | 5.00E-05 | 0.000948525 | yes |
| MMP12    | chr11:102733463-102745764      | TTD7PVmother_nt | TTD7PV_nt | OK | 2.95622 | 0.566382 | -2.38391 | -4.2214 | 5.00E-05 | 0.000948525 | yes |
| MMP15    | chr16:58059281-58080804        | TTD7PVmother_nt | TTD7PV_nt | OK | 4.13679 | 1.8068   | -1.19507 | -3.2377 | 5.00E-05 | 0.000948525 | yes |

|         |                           |                 |           |    |         |          |          |         |          |             |     |
|---------|---------------------------|-----------------|-----------|----|---------|----------|----------|---------|----------|-------------|-----|
| MMP3    | chr11:102654406-102714342 | TTD7PVmother_nt | TTD7PV_nt | OK | 232.701 | 72.2742  | -1.68693 | -1.8159 | 0.0042   | 0.0380962   | yes |
| MOXD1   | chr6:132617193-132722664  | TTD7PVmother_nt | TTD7PV_nt | OK | 67.6325 | 26.2902  | -1.36319 | -4.7851 | 5.00E-05 | 0.000948525 | yes |
| MPP3    | chr17:41878166-41910547   | TTD7PVmother_nt | TTD7PV_nt | OK | 3.92129 | 1.93621  | -1.01809 | -2.1607 | 0.0002   | 0.00323166  | yes |
| MRAP2   | chr6:84743419-84800605    | TTD7PVmother_nt | TTD7PV_nt | OK | 2.28517 | 0.625714 | -1.86872 | -3.4646 | 5.00E-05 | 0.000948525 | yes |
| MREG    | chr2:216807313-216878346  | TTD7PVmother_nt | TTD7PV_nt | OK | 2.31064 | 1.01042  | -1.19334 | -2.5938 | 0.00025  | 0.00388815  | yes |
| MRVI1   | chr11:10562782-10715535   | TTD7PVmother_nt | TTD7PV_nt | OK | 4.19907 | 0.206401 | -4.34655 | -7.1611 | 5.00E-05 | 0.000948525 | yes |
| MSR1    | chr8:15965386-16050300    | TTD7PVmother_nt | TTD7PV_nt | OK | 0.16799 | 0.79473  | 2.24207  | 3.12069 | 5.00E-05 | 0.000948525 | yes |
| MSTN    | chr2:190920425-190927455  | TTD7PVmother_nt | TTD7PV_nt | OK | 0.53044 | 3.58365  | 2.75616  | 5.31856 | 5.00E-05 | 0.000948525 | yes |
| MT1E    | chr16:56659584-56661024   | TTD7PVmother_nt | TTD7PV_nt | OK | 32.0787 | 84.5707  | 1.39854  | 7.54698 | 5.00E-05 | 0.000948525 | yes |
| MUC1    | chr1:155158299-155162706  | TTD7PVmother_nt | TTD7PV_nt | OK | 10.9474 | 5.41418  | -1.01577 | -2.5345 | 5.00E-05 | 0.000948525 | yes |
| MX1     | chr21:42792519-42831141   | TTD7PVmother_nt | TTD7PV_nt | OK | 0.97411 | 2.03859  | 1.06542  | 1.95813 | 0.0006   | 0.00798882  | yes |
| MYADM   | chr19:54369610-54379689   | TTD7PVmother_nt | TTD7PV_nt | OK | 140.191 | 68.1888  | -1.03979 | -3.3345 | 5.00E-05 | 0.000948525 | yes |
| MYH2    | chr17:10424464-10453017   | TTD7PVmother_nt | TTD7PV_nt | OK | 0.69718 | 0.309382 | -1.17214 | -1.5764 | 0.00085  | 0.0105426   | yes |
| MYL9    | chr20:35169886-35178226   | TTD7PVmother_nt | TTD7PV_nt | OK | 547.293 | 249.389  | -1.13392 | -2.9319 | 5.00E-05 | 0.000948525 | yes |
| MYLK    | chr3:123304402-123603149  | TTD7PVmother_nt | TTD7PV_nt | OK | 29.3599 | 7.79073  | -1.91401 | -4.8294 | 5.00E-05 | 0.000948525 | yes |
| N4BP2L1 | chr13:32974859-33002315   | TTD7PVmother_nt | TTD7PV_nt | OK | 0.88404 | 0.366453 | -1.27048 | -1.9534 | 0.00125  | 0.0144842   | yes |
| NBL1    | chr1:19923470-19984949    | TTD7PVmother_nt | TTD7PV_nt | OK | 140.908 | 59.1362  | -1.25264 | -3.1145 | 5.00E-05 | 0.000948525 | yes |
| NDRG2   | chr14:21484921-21493935   | TTD7PVmother_nt | TTD7PV_nt | OK | 1.01482 | 0.200797 | -2.33741 | -2.5767 | 5.00E-05 | 0.000948525 | yes |
| NDRG4   | chr16:58497548-58547523   | TTD7PVmother_nt | TTD7PV_nt | OK | 1.58411 | 0.574918 | -1.46225 | -2.5022 | 5.00E-05 | 0.000948525 | yes |
| NEGR1   | chr1:71868624-72748277    | TTD7PVmother_nt | TTD7PV_nt | OK | 6.18971 | 2.43004  | -1.34889 | -4.1156 | 5.00E-05 | 0.000948525 | yes |
| NEIL1   | chr15:75639330-75647592   | TTD7PVmother_nt | TTD7PV_nt | OK | 1.31327 | 0.525986 | -1.32007 | -1.9127 | 0.0013   | 0.0149558   | yes |
| NETO2   | chr16:47115430-47177936   | TTD7PVmother_nt | TTD7PV_nt | OK | 0.67251 | 1.55432  | 1.20866  | 2.32434 | 0.00025  | 0.00388815  | yes |
| NFASC   | chr1:204797781-204991950  | TTD7PVmother_nt | TTD7PV_nt | OK | 19.5739 | 9.56841  | -1.03258 | -2.3957 | 5.00E-05 | 0.000948525 | yes |
| NKX3-1  | chr8:23536205-23540450    | TTD7PVmother_nt | TTD7PV_nt | OK | 3.33831 | 1.54491  | -1.11159 | -2.4643 | 0.0001   | 0.00172182  | yes |
| NMNAT2  | chr1:183217371-183387634  | TTD7PVmother_nt | TTD7PV_nt | OK | 0.54932 | 0.222483 | -1.30394 | -2.0383 | 0.00035  | 0.00513307  | yes |
| NOTCH3  | chr19:15270443-15311792   | TTD7PVmother_nt | TTD7PV_nt | OK | 6.78522 | 1.48315  | -2.19373 | -6.4036 | 5.00E-05 | 0.000948525 | yes |
| NPR1    | chr1:153651163-153666468  | TTD7PVmother_nt | TTD7PV_nt | OK | 3.23605 | 0.231978 | -3.80217 | -6.72   | 5.00E-05 | 0.000948525 | yes |
| NPTX2   | chr7:98246596-98259181    | TTD7PVmother_nt | TTD7PV_nt | OK | 0.29794 | 0.944007 | 1.66379  | 2.53504 | 0.00035  | 0.00513307  | yes |
| NPTXR   | chr22:39214455-39240017   | TTD7PVmother_nt | TTD7PV_nt | OK | 4.78774 | 1.65669  | -1.53104 | -4.2487 | 5.00E-05 | 0.000948525 | yes |
| NQO1    | chr16:69743303-69760533   | TTD7PVmother_nt | TTD7PV_nt | OK | 64.0712 | 134.379  | 1.06856  | 3.24345 | 5.00E-05 | 0.000948525 | yes |
| NROB1   | chrX:30322538-30327495    | TTD7PVmother_nt | TTD7PV_nt | OK | 0.84263 | 0.294398 | -1.51713 | -2.1783 | 0.0042   | 0.0380962   | yes |
| NRG1    | chr8:31497267-32622558    | TTD7PVmother_nt | TTD7PV_nt | OK | 9.34313 | 24.8358  | 1.41044  | 3.89989 | 5.00E-05 | 0.000948525 | yes |
| NRP2    | chr2:206547223-206662857  | TTD7PVmother_nt | TTD7PV_nt | OK | 10.3616 | 4.24072  | -1.28887 | -3.5038 | 5.00E-05 | 0.000948525 | yes |

|         |                           |                 |           |    |         |          |          |         |          |             |     |
|---------|---------------------------|-----------------|-----------|----|---------|----------|----------|---------|----------|-------------|-----|
| NTNG1   | chr1:107682628-108024475  | TTD7PVmother_nt | TTD7PV_nt | OK | 3.82327 | 7.92767  | 1.05209  | 2.72328 | 5.00E-05 | 0.000948525 | yes |
| NTRK2   | chr9:87283465-87638505    | TTD7PVmother_nt | TTD7PV_nt | OK | 0.18794 | 0.742992 | 1.98311  | 3.18766 | 5.00E-05 | 0.000948525 | yes |
| NXPB3   | chr17:47653297-47661171   | TTD7PVmother_nt | TTD7PV_nt | OK | 0.86259 | 0.094238 | -3.19431 | -4.3618 | 5.00E-05 | 0.000948525 | yes |
| OSBP2   | chr22:31090792-31303811   | TTD7PVmother_nt | TTD7PV_nt | OK | 1.21791 | 0.465605 | -1.38723 | -2.4207 | 0.0001   | 0.00172182  | yes |
| OSCAR   | chr19:54597932-54604148   | TTD7PVmother_nt | TTD7PV_nt | OK | 1.60336 | 0.387131 | -2.0502  | -2.6922 | 5.00E-05 | 0.000948525 | yes |
| OSR2    | chr8:99956630-99964326    | TTD7PVmother_nt | TTD7PV_nt | OK | 35.7043 | 16.1915  | -1.14086 | -3.4337 | 5.00E-05 | 0.000948525 | yes |
| PAG1    | chr8:81880045-82024303    | TTD7PVmother_nt | TTD7PV_nt | OK | 0.71648 | 0.252593 | -1.50411 | -3.0469 | 5.00E-05 | 0.000948525 | yes |
| PALLD   | chr4:169418216-169849608  | TTD7PVmother_nt | TTD7PV_nt | OK | 27.0568 | 12.1255  | -1.15794 | -3.7286 | 5.00E-05 | 0.000948525 | yes |
| PAM     | chr5:102201526-102366808  | TTD7PVmother_nt | TTD7PV_nt | OK | 152.82  | 75.5463  | -1.0164  | -2.659  | 5.00E-05 | 0.000948525 | yes |
| PAOX    | chr10:135192740-135205198 | TTD7PVmother_nt | TTD7PV_nt | OK | 2.7146  | 1.32831  | -1.03115 | -1.7836 | 0.00265  | 0.0262793   | yes |
| PAPPA2  | chr1:176432306-176811970  | TTD7PVmother_nt | TTD7PV_nt | OK | 1.96494 | 11.3057  | 2.52449  | 6.82392 | 5.00E-05 | 0.000948525 | yes |
| PARD6G  | chr18:77905806-78005397   | TTD7PVmother_nt | TTD7PV_nt | OK | 2.32868 | 0.844232 | -1.4638  | -2.9683 | 5.00E-05 | 0.000948525 | yes |
| PARK2   | chr6:161768589-163745505  | TTD7PVmother_nt | TTD7PV_nt | OK | 0.72427 | 0.316578 | -1.19398 | -1.9125 | 0.0031   | 0.0297999   | yes |
| PARP8   | chr5:49961732-50142356    | TTD7PVmother_nt | TTD7PV_nt | OK | 0.55195 | 0.149901 | -1.88054 | -3.1317 | 5.00E-05 | 0.000948525 | yes |
| PAX8    | chr2:113973573-114036498  | TTD7PVmother_nt | TTD7PV_nt | OK | 0.58943 | 0.037813 | -3.96234 | -2.5787 | 0.00065  | 0.00852222  | yes |
| PBX4    | chr19:19672515-19729725   | TTD7PVmother_nt | TTD7PV_nt | OK | 0.67694 | 0.222274 | -1.60669 | -1.818  | 0.00385  | 0.035625    | yes |
| PCDH10  | chr4:134070469-134112732  | TTD7PVmother_nt | TTD7PV_nt | OK | 2.22867 | 13.0853  | 2.55369  | 7.18681 | 5.00E-05 | 0.000948525 | yes |
| PCDH7   | chr4:30722029-31148423    | TTD7PVmother_nt | TTD7PV_nt | OK | 3.66205 | 0.940284 | -1.96148 | -4.4017 | 5.00E-05 | 0.000948525 | yes |
| PCDHB10 | chr5:140571951-140575213  | TTD7PVmother_nt | TTD7PV_nt | OK | 0.59083 | 0.233594 | -1.33875 | -2.1174 | 0.0015   | 0.0167911   | yes |
| PCDHB14 | chr5:140603077-140605860  | TTD7PVmother_nt | TTD7PV_nt | OK | 1.15029 | 0.56388  | -1.02853 | -1.8515 | 0.00455  | 0.0404717   | yes |
| PCDHB16 | chr5:140560979-140565796  | TTD7PVmother_nt | TTD7PV_nt | OK | 1.08834 | 0.441251 | -1.30245 | -2.5947 | 5.00E-05 | 0.000948525 | yes |
| PCDHB5  | chr5:140514799-140517704  | TTD7PVmother_nt | TTD7PV_nt | OK | 0.53629 | 1.37127  | 1.35444  | 2.47708 | 0.00035  | 0.00513307  | yes |
| PCSK1   | chr5:95726039-95768985    | TTD7PVmother_nt | TTD7PV_nt | OK | 0.81238 | 2.63596  | 1.6981   | 3.73675 | 5.00E-05 | 0.000948525 | yes |
| PCSK1N  | chrX:48689503-48694036    | TTD7PVmother_nt | TTD7PV_nt | OK | 2.13317 | 9.68917  | 2.18337  | 5.46776 | 5.00E-05 | 0.000948525 | yes |
| PCSK5   | chr9:78505559-78977255    | TTD7PVmother_nt | TTD7PV_nt | OK | 4.20147 | 1.93354  | -1.11965 | -2.4423 | 5.00E-05 | 0.000948525 | yes |
| PDE1A   | chr2:183004761-183387572  | TTD7PVmother_nt | TTD7PV_nt | OK | 4.80476 | 2.0733   | -1.21253 | -2.5721 | 5.00E-05 | 0.000948525 | yes |
| PDE1C   | chr7:31792631-32338383    | TTD7PVmother_nt | TTD7PV_nt | OK | 3.56753 | 7.56733  | 1.08486  | 2.40147 | 0.0001   | 0.00172182  | yes |
| PDGFRL  | chr8:17433941-17500642    | TTD7PVmother_nt | TTD7PV_nt | OK | 6.83719 | 3.07925  | -1.15083 | -2.9352 | 5.00E-05 | 0.000948525 | yes |
| PDLIM5  | chr4:95373007-95589378    | TTD7PVmother_nt | TTD7PV_nt | OK | 25.4877 | 12.2531  | -1.05665 | -2.793  | 5.00E-05 | 0.000948525 | yes |
| PDPN    | chr1:13910251-13944452    | TTD7PVmother_nt | TTD7PV_nt | OK | 2.26949 | 0.966713 | -1.23121 | -2.3248 | 0.00035  | 0.00513307  | yes |
| PEX6    | chr6:42928499-42946981    | TTD7PVmother_nt | TTD7PV_nt | OK | 3.6384  | 8.10154  | 1.15489  | 3.1464  | 5.00E-05 | 0.000948525 | yes |
| PGM2L1  | chr11:74041360-74109502   | TTD7PVmother_nt | TTD7PV_nt | OK | 2.19418 | 0.87704  | -1.32297 | -3.5725 | 5.00E-05 | 0.000948525 | yes |
| PHGDH   | chr1:120254418-120286849  | TTD7PVmother_nt | TTD7PV_nt | OK | 84.7345 | 182.416  | 1.10621  | 3.63881 | 5.00E-05 | 0.000948525 | yes |

|           |                          |                 |           |    |         |          |          |         |          |             |     |
|-----------|--------------------------|-----------------|-----------|----|---------|----------|----------|---------|----------|-------------|-----|
| PIANP     | chr12:6802956-6810009    | TTD7PVmother_nt | TTD7PV_nt | OK | 1.83878 | 0.718796 | -1.35509 | -2.3012 | 0.00045  | 0.0062912   | yes |
| PIFO      | chr1:111889194-111895639 | TTD7PVmother_nt | TTD7PV_nt | OK | 0.7034  | 0.267087 | -1.39702 | -2.0311 | 0.00345  | 0.0326039   | yes |
| PIK3IP1   | chr22:31677578-31688520  | TTD7PVmother_nt | TTD7PV_nt | OK | 24.496  | 7.20543  | -1.76539 | -5.0072 | 5.00E-05 | 0.000948525 | yes |
| PIK3R3    | chr1:46505811-46598708   | TTD7PVmother_nt | TTD7PV_nt | OK | 1.40105 | 0.65776  | -1.09088 | -2.2427 | 0.00035  | 0.00513307  | yes |
| PINLYP    | chr19:44080951-44086256  | TTD7PVmother_nt | TTD7PV_nt | OK | 2.05578 | 5.0346   | 1.29219  | 1.78061 | 0.0037   | 0.0344352   | yes |
| PION      | chr7:76940067-77045717   | TTD7PVmother_nt | TTD7PV_nt | OK | 0.74835 | 0.25759  | -1.53864 | -2.413  | 0.0009   | 0.0110351   | yes |
| PIR       | chrX:15363712-15511711   | TTD7PVmother_nt | TTD7PV_nt | OK | 2.84586 | 6.34762  | 1.15735  | 2.34912 | 0.0001   | 0.00172182  | yes |
| PITPNM3   | chr17:6354582-6459877    | TTD7PVmother_nt | TTD7PV_nt | OK | 1.33917 | 0.329974 | -2.02092 | -3.9431 | 5.00E-05 | 0.000948525 | yes |
| PLA2G4C   | chr19:48551099-48614109  | TTD7PVmother_nt | TTD7PV_nt | OK | 1.31747 | 0.45477  | -1.53456 | -2.278  | 0.00035  | 0.00513307  | yes |
| PLCB4     | chr20:9049700-9461462    | TTD7PVmother_nt | TTD7PV_nt | OK | 3.40637 | 0.856514 | -1.99169 | -4.3065 | 5.00E-05 | 0.000948525 | yes |
| PLCL1     | chr2:198669425-199014608 | TTD7PVmother_nt | TTD7PV_nt | OK | 0.91047 | 0.398324 | -1.19268 | -2.3991 | 0.00035  | 0.00513307  | yes |
| PLEKHA6   | chr1:204187978-204329057 | TTD7PVmother_nt | TTD7PV_nt | OK | 0.99812 | 0.231583 | -2.10769 | -3.918  | 5.00E-05 | 0.000948525 | yes |
| PLEKHG5   | chr1:6521213-6580121     | TTD7PVmother_nt | TTD7PV_nt | OK | 3.33197 | 1.50081  | -1.15063 | -2.5261 | 5.00E-05 | 0.000948525 | yes |
| PLEKHM1P  | chr17:62780958-62833302  | TTD7PVmother_nt | TTD7PV_nt | OK | 6.82081 | 3.06578  | -1.15369 | -2.8749 | 5.00E-05 | 0.000948525 | yes |
| PLXNB1    | chr3:48445260-48471460   | TTD7PVmother_nt | TTD7PV_nt | OK | 10.9353 | 3.8091   | -1.52147 | -4.6086 | 5.00E-05 | 0.000948525 | yes |
| PLXNB3    | chrX:153029650-153044801 | TTD7PVmother_nt | TTD7PV_nt | OK | 3.67503 | 0.7448   | -2.30283 | -5.3256 | 5.00E-05 | 0.000948525 | yes |
| PLXNC1    | chr12:94542498-94701451  | TTD7PVmother_nt | TTD7PV_nt | OK | 2.9904  | 0.659025 | -2.18193 | -4.3999 | 5.00E-05 | 0.000948525 | yes |
| PMP22     | chr17:15133095-15168644  | TTD7PVmother_nt | TTD7PV_nt | OK | 257.528 | 113.575  | -1.18108 | -3.4143 | 5.00E-05 | 0.000948525 | yes |
| PNMAL1    | chr19:46969747-46974820  | TTD7PVmother_nt | TTD7PV_nt | OK | 3.75547 | 0.802162 | -2.22703 | -4.4551 | 5.00E-05 | 0.000948525 | yes |
| PNPLA7    | chr9:140354404-140444986 | TTD7PVmother_nt | TTD7PV_nt | OK | 1.09327 | 0.237448 | -2.20296 | -3.5853 | 5.00E-05 | 0.000948525 | yes |
| POSTN     | chr13:38136718-38172981  | TTD7PVmother_nt | TTD7PV_nt | OK | 228.618 | 918.639  | 2.00656  | 2.73015 | 5.00E-05 | 0.000948525 | yes |
| PPAP2C    | chr19:281043-291435      | TTD7PVmother_nt | TTD7PV_nt | OK | 7.29138 | 2.62403  | -1.47441 | -2.876  | 5.00E-05 | 0.000948525 | yes |
| PPAPDC3   | chr9:134165080-134184649 | TTD7PVmother_nt | TTD7PV_nt | OK | 2.23914 | 0.542296 | -2.04579 | -3.8916 | 5.00E-05 | 0.000948525 | yes |
| PPFIA4    | chr1:203020310-203047864 | TTD7PVmother_nt | TTD7PV_nt | OK | 0.92531 | 0.170934 | -2.43649 | -3.8592 | 5.00E-05 | 0.000948525 | yes |
| PPFIBP2   | chr11:7534995-7674996    | TTD7PVmother_nt | TTD7PV_nt | OK | 7.62719 | 3.34935  | -1.18727 | -3.0387 | 5.00E-05 | 0.000948525 | yes |
| PPP1R14A  | chr19:38741876-38747231  | TTD7PVmother_nt | TTD7PV_nt | OK | 5.89419 | 0.507554 | -3.53766 | -3.5026 | 5.00E-05 | 0.000948525 | yes |
| PPP4R4    | chr14:94640648-94746072  | TTD7PVmother_nt | TTD7PV_nt | OK | 0.46501 | 0.0723   | -2.68519 | -2.0469 | 0.00055  | 0.00745427  | yes |
| PRDM16    | chr1:2985741-3355185     | TTD7PVmother_nt | TTD7PV_nt | OK | 0.18272 | 1.20477  | 2.72103  | 4.8326  | 5.00E-05 | 0.000948525 | yes |
| PRELP     | chr1:203444882-203460479 | TTD7PVmother_nt | TTD7PV_nt | OK | 4.34769 | 0.690122 | -2.65533 | -5.9242 | 5.00E-05 | 0.000948525 | yes |
| PRICKLE4  | chr6:41748499-41755110   | TTD7PVmother_nt | TTD7PV_nt | OK | 2.30439 | 1.12633  | -1.03276 | -1.9976 | 0.0039   | 0.0360099   | yes |
| PRIMA1    | chr14:94184643-94254766  | TTD7PVmother_nt | TTD7PV_nt | OK | 1.00133 | 0.290308 | -1.78626 | -2.8923 | 5.00E-05 | 0.000948525 | yes |
| PRKCD     | chr3:53195222-53226733   | TTD7PVmother_nt | TTD7PV_nt | OK | 5.96674 | 2.6549   | -1.16829 | -2.7114 | 5.00E-05 | 0.000948525 | yes |
| PROSAPIP1 | chr20:3143272-3149207    | TTD7PVmother_nt | TTD7PV_nt | OK | 3.62697 | 1.73623  | -1.06281 | -2.8978 | 5.00E-05 | 0.000948525 | yes |

|          |                           |                 |           |    |         |          |          |         |          |             |     |
|----------|---------------------------|-----------------|-----------|----|---------|----------|----------|---------|----------|-------------|-----|
| PRSS23   | chr11:86511490-86522273   | TTD7PVmother_nt | TTD7PV_nt | OK | 157.717 | 74.4203  | -1.08357 | -3.3342 | 5.00E-05 | 0.000948525 | yes |
| PRUNE2   | chr9:79226291-79521003    | TTD7PVmother_nt | TTD7PV_nt | OK | 7.47353 | 1.07876  | -2.79241 | -7.6713 | 5.00E-05 | 0.000948525 | yes |
| PSEN2    | chr1:227058272-227083804  | TTD7PVmother_nt | TTD7PV_nt | OK | 8.07625 | 2.76692  | -1.54541 | -3.6474 | 5.00E-05 | 0.000948525 | yes |
| PSG1     | chr19:43370612-43383871   | TTD7PVmother_nt | TTD7PV_nt | OK | 31.9413 | 1.90932  | -4.06429 | -8.7634 | 5.00E-05 | 0.000948525 | yes |
| PSG10P   | chr19:43341148-43359870   | TTD7PVmother_nt | TTD7PV_nt | OK | 0.92428 | 0.293208 | -1.6564  | -2.3513 | 0.00095  | 0.0115056   | yes |
| PSG2     | chr19:43568361-43586893   | TTD7PVmother_nt | TTD7PV_nt | OK | 5.75497 | 1.78024  | -1.69274 | -3.8439 | 5.00E-05 | 0.000948525 | yes |
| PSG4     | chr19:43696853-43709926   | TTD7PVmother_nt | TTD7PV_nt | OK | 0.86325 | 35.493   | 5.36161  | 10.3307 | 5.00E-05 | 0.000948525 | yes |
| PSG9     | chr19:43757434-43773682   | TTD7PVmother_nt | TTD7PV_nt | OK | 1.449   | 0.588698 | -1.29946 | -2.2163 | 0.00185  | 0.0197466   | yes |
| PSPH     | chr7:56078743-56119268    | TTD7PVmother_nt | TTD7PV_nt | OK | 6.26408 | 12.9808  | 1.0512   | 3.36383 | 5.00E-05 | 0.000948525 | yes |
| PTGES    | chr9:132500614-132515344  | TTD7PVmother_nt | TTD7PV_nt | OK | 55.9226 | 25.4288  | -1.13697 | -4.3268 | 5.00E-05 | 0.000948525 | yes |
| PTGIS    | chr20:48120410-48184707   | TTD7PVmother_nt | TTD7PV_nt | OK | 93.671  | 11.7723  | -2.99221 | -8.4748 | 5.00E-05 | 0.000948525 | yes |
| PTGS1    | chr9:125132808-125157982  | TTD7PVmother_nt | TTD7PV_nt | OK | 16.5142 | 4.22483  | -1.96674 | -5.8941 | 5.00E-05 | 0.000948525 | yes |
| PTH1R    | chr3:46919235-46945289    | TTD7PVmother_nt | TTD7PV_nt | OK | 1.07982 | 2.1968   | 1.02461  | 1.76092 | 0.0025   | 0.0251801   | yes |
| PTHLH    | chr12:28111016-28124916   | TTD7PVmother_nt | TTD7PV_nt | OK | 1.48634 | 0.454043 | -1.71086 | -2.2003 | 0.00055  | 0.00745427  | yes |
| PTN      | chr7:136912091-137028546  | TTD7PVmother_nt | TTD7PV_nt | OK | 7.30938 | 3.4906   | -1.06627 | -2.676  | 0.0001   | 0.00172182  | yes |
| PTPRN    | chr2:220154344-220174295  | TTD7PVmother_nt | TTD7PV_nt | OK | 6.46631 | 2.77698  | -1.21943 | -2.8592 | 5.00E-05 | 0.000948525 | yes |
| PTPRU    | chr1:29563027-29653325    | TTD7PVmother_nt | TTD7PV_nt | OK | 5.76448 | 2.50215  | -1.20402 | -3.39   | 5.00E-05 | 0.000948525 | yes |
| PYCR1    | chr17:79890266-79894968   | TTD7PVmother_nt | TTD7PV_nt | OK | 39.4192 | 82.5911  | 1.06709  | 3.09799 | 5.00E-05 | 0.000948525 | yes |
| QPCT     | chr2:37571752-37600465    | TTD7PVmother_nt | TTD7PV_nt | OK | 18.8415 | 8.63993  | -1.12482 | -3.8008 | 5.00E-05 | 0.000948525 | yes |
| QPRT     | chr16:29690440-29709314   | TTD7PVmother_nt | TTD7PV_nt | OK | 22.741  | 6.25287  | -1.86271 | -5.4077 | 5.00E-05 | 0.000948525 | yes |
| RAB20    | chr13:111175412-111214071 | TTD7PVmother_nt | TTD7PV_nt | OK | 1.08028 | 0.240185 | -2.16919 | -2.9172 | 0.00035  | 0.00513307  | yes |
| RAB39B   | chrX:154487525-154493852  | TTD7PVmother_nt | TTD7PV_nt | OK | 0.42222 | 1.31332  | 1.63715  | 3.00651 | 5.00E-05 | 0.000948525 | yes |
| RAB3B    | chr1:52373627-52456436    | TTD7PVmother_nt | TTD7PV_nt | OK | 9.14851 | 4.09043  | -1.16128 | -3.8002 | 5.00E-05 | 0.000948525 | yes |
| RAP1GAP2 | chr17:2699731-2941035     | TTD7PVmother_nt | TTD7PV_nt | OK | 0.47725 | 0.021083 | -4.50061 | -3.8924 | 0.00015  | 0.00249264  | yes |
| RARRES1  | chr3:158414896-158450275  | TTD7PVmother_nt | TTD7PV_nt | OK | 0.7164  | 2.28549  | 1.67366  | 2.27758 | 0.0002   | 0.00323166  | yes |
| RARRES2  | chr7:150035406-150038763  | TTD7PVmother_nt | TTD7PV_nt | OK | 9.50367 | 25.591   | 1.42908  | 4.59902 | 5.00E-05 | 0.000948525 | yes |
| RASD1    | chr17:17397752-17399709   | TTD7PVmother_nt | TTD7PV_nt | OK | 3.08015 | 0.660106 | -2.22223 | -3.5671 | 5.00E-05 | 0.000948525 | yes |
| RASD2    | chr22:35937351-35950045   | TTD7PVmother_nt | TTD7PV_nt | OK | 1.53558 | 0.078315 | -4.29336 | -5.2585 | 5.00E-05 | 0.000948525 | yes |
| RASSF3   | chr12:65004292-65091347   | TTD7PVmother_nt | TTD7PV_nt | OK | 6.796   | 2.4858   | -1.45097 | -3.9241 | 5.00E-05 | 0.000948525 | yes |
| RASSF5   | chr1:206680878-206762616  | TTD7PVmother_nt | TTD7PV_nt | OK | 1.42928 | 0.674556 | -1.08328 | -1.9702 | 0.00075  | 0.0095227   | yes |
| RASSF7   | chr11:560970-564025       | TTD7PVmother_nt | TTD7PV_nt | OK | 2.21047 | 0.83479  | -1.40487 | -2.1708 | 0.0003   | 0.00450245  | yes |
| RBM24    | chr6:17281808-17294099    | TTD7PVmother_nt | TTD7PV_nt | OK | 2.74541 | 0.830439 | -1.72508 | -3.2168 | 5.00E-05 | 0.000948525 | yes |
| RBP1     | chr3:139236275-139258671  | TTD7PVmother_nt | TTD7PV_nt | OK | 0.523   | 1.9027   | 1.86317  | 1.94701 | 0.0006   | 0.00798882  | yes |

|          |                          |                 |           |    |         |          |          |         |          |             |     |
|----------|--------------------------|-----------------|-----------|----|---------|----------|----------|---------|----------|-------------|-----|
| RENBP    | chrX:153200721-153210232 | TTD7PVmother_nt | TTD7PV_nt | OK | 11.7764 | 2.84158  | -2.05113 | -5.1531 | 5.00E-05 | 0.000948525 | yes |
| RGN      | chrX:46937774-46952712   | TTD7PVmother_nt | TTD7PV_nt | OK | 1.25904 | 0.516358 | -1.28588 | -1.7937 | 0.00315  | 0.0301678   | yes |
| RIMS1    | chr6:72596405-73112845   | TTD7PVmother_nt | TTD7PV_nt | OK | 1.3277  | 0.152999 | -3.11734 | -3.5755 | 5.00E-05 | 0.000948525 | yes |
| RIPK3    | chr14:24805226-24809242  | TTD7PVmother_nt | TTD7PV_nt | OK | 9.62711 | 2.52649  | -1.92997 | -4.8783 | 5.00E-05 | 0.000948525 | yes |
| RIPK4    | chr21:43159528-43187249  | TTD7PVmother_nt | TTD7PV_nt | OK | 0.30058 | 1.15518  | 1.94227  | 2.98673 | 5.00E-05 | 0.000948525 | yes |
| RNF144A  | chr2:7052406-7184309     | TTD7PVmother_nt | TTD7PV_nt | OK | 1.8521  | 0.457255 | -2.01809 | -3.9792 | 5.00E-05 | 0.000948525 | yes |
| RNF157   | chr17:74132414-74236390  | TTD7PVmother_nt | TTD7PV_nt | OK | 0.88417 | 0.255801 | -1.7893  | -2.8869 | 5.00E-05 | 0.000948525 | yes |
| RNF180   | chr5:63461670-63668696   | TTD7PVmother_nt | TTD7PV_nt | OK | 1.13825 | 0.098105 | -3.53635 | -2.7034 | 0.00025  | 0.00388815  | yes |
| RNF182   | chr6:13924676-13980240   | TTD7PVmother_nt | TTD7PV_nt | OK | 2.54465 | 1.22935  | -1.04957 | -2.2478 | 0.00025  | 0.00388815  | yes |
| RPL22L1  | chr3:170582664-170588045 | TTD7PVmother_nt | TTD7PV_nt | OK | 15.1325 | 31.6191  | 1.06314  | 4.13249 | 5.00E-05 | 0.000948525 | yes |
| RPP25    | chr15:75247442-75249775  | TTD7PVmother_nt | TTD7PV_nt | OK | 4.65055 | 1.62919  | -1.51324 | -3.6109 | 5.00E-05 | 0.000948525 | yes |
| RPSAP58  | chr19:23945815-24010919  | TTD7PVmother_nt | TTD7PV_nt | OK | 4.4118  | 17.0266  | 1.94835  | 5.61598 | 5.00E-05 | 0.000948525 | yes |
| RRAD     | chr16:66955581-66959439  | TTD7PVmother_nt | TTD7PV_nt | OK | 6.09233 | 1.34847  | -2.17567 | -3.8689 | 5.00E-05 | 0.000948525 | yes |
| RSPO3    | chr6:127440047-127518184 | TTD7PVmother_nt | TTD7PV_nt | OK | 47.0823 | 8.94438  | -2.39613 | -7.2524 | 5.00E-05 | 0.000948525 | yes |
| RTN4RL1  | chr17:1837970-1928178    | TTD7PVmother_nt | TTD7PV_nt | OK | 1.2175  | 0.494287 | -1.30051 | -2.2753 | 0.00065  | 0.00852222  | yes |
| S100P    | chr4:6695565-6698897     | TTD7PVmother_nt | TTD7PV_nt | OK | 0.56807 | 3.35041  | 2.56018  | 5.13507 | 0.00215  | 0.022301    | yes |
| S1PR1    | chr1:101702304-101707076 | TTD7PVmother_nt | TTD7PV_nt | OK | 8.38817 | 17.1787  | 1.0342   | 3.48085 | 5.00E-05 | 0.000948525 | yes |
| SALL1    | chr16:51169885-51185183  | TTD7PVmother_nt | TTD7PV_nt | OK | 2.31222 | 0.283151 | -3.02964 | -5.5413 | 5.00E-05 | 0.000948525 | yes |
| SBSPON   | chr8:73976777-74005507   | TTD7PVmother_nt | TTD7PV_nt | OK | 1.06918 | 0.04848  | -4.46297 | -5.3704 | 5.00E-05 | 0.000948525 | yes |
| SCG2     | chr2:224461657-224467217 | TTD7PVmother_nt | TTD7PV_nt | OK | 4.06392 | 0.675764 | -2.58828 | -5.1297 | 5.00E-05 | 0.000948525 | yes |
| SCG5     | chr15:32933869-32989298  | TTD7PVmother_nt | TTD7PV_nt | OK | 5.1821  | 1.77911  | -1.54238 | -2.6719 | 5.00E-05 | 0.000948525 | yes |
| SCIN     | chr7:12610202-12693228   | TTD7PVmother_nt | TTD7PV_nt | OK | 6.04399 | 0.593113 | -3.34912 | -6.0018 | 5.00E-05 | 0.000948525 | yes |
| SCN9A    | chr2:167051696-167232497 | TTD7PVmother_nt | TTD7PV_nt | OK | 1.16477 | 0.078688 | -3.88777 | -6.3915 | 5.00E-05 | 0.000948525 | yes |
| SCRG1    | chr4:174309298-174320617 | TTD7PVmother_nt | TTD7PV_nt | OK | 9.19207 | 22.0261  | 1.26076  | 3.89544 | 5.00E-05 | 0.000948525 | yes |
| SCUBE3   | chr6:35182189-35218609   | TTD7PVmother_nt | TTD7PV_nt | OK | 4.15408 | 0.161693 | -4.6832  | -7.5031 | 5.00E-05 | 0.000948525 | yes |
| SDPR     | chr2:192699031-192712006 | TTD7PVmother_nt | TTD7PV_nt | OK | 5.5748  | 2.51368  | -1.14912 | -3.0026 | 5.00E-05 | 0.000948525 | yes |
| SEC16B   | chr1:177898241-177939050 | TTD7PVmother_nt | TTD7PV_nt | OK | 0.94292 | 1.89944  | 1.01036  | 2.10464 | 0.0004   | 0.00575481  | yes |
| SEL1L3   | chr4:25749048-25864610   | TTD7PVmother_nt | TTD7PV_nt | OK | 6.76311 | 14.0372  | 1.0535   | 2.93495 | 5.00E-05 | 0.000948525 | yes |
| SEMA3E   | chr7:82993221-83278479   | TTD7PVmother_nt | TTD7PV_nt | OK | 1.35578 | 0.668721 | -1.01965 | -2.2323 | 0.00035  | 0.00513307  | yes |
| SEMA7A   | chr15:74701629-74726299  | TTD7PVmother_nt | TTD7PV_nt | OK | 24.0053 | 11.8308  | -1.02081 | -3.0758 | 5.00E-05 | 0.000948525 | yes |
| SERINC2  | chr1:31882411-31907527   | TTD7PVmother_nt | TTD7PV_nt | OK | 26.3668 | 10.3525  | -1.34874 | -4.1646 | 5.00E-05 | 0.000948525 | yes |
| SERPINB2 | chr18:61554938-61571124  | TTD7PVmother_nt | TTD7PV_nt | OK | 20.3978 | 8.81647  | -1.21014 | -3.2517 | 5.00E-05 | 0.000948525 | yes |
| SERPINB7 | chr18:61420280-61472610  | TTD7PVmother_nt | TTD7PV_nt | OK | 6.31053 | 0.872202 | -2.85503 | -5.2538 | 5.00E-05 | 0.000948525 | yes |

|          |                          |                 |           |    |         |          |          |         |          |             |     |
|----------|--------------------------|-----------------|-----------|----|---------|----------|----------|---------|----------|-------------|-----|
| SERPINH1 | chr11:75273100-75283849  | TTD7PVmother_nt | TTD7PV_nt | OK | 363.848 | 795.726  | 1.12893  | 2.19163 | 5.00E-05 | 0.000948525 | yes |
| SERPINI1 | chr3:167453431-167543357 | TTD7PVmother_nt | TTD7PV_nt | OK | 1.75808 | 0.712647 | -1.30274 | -2.0032 | 0.0014   | 0.015879    | yes |
| SEZ6L2   | chr16:29882479-29910585  | TTD7PVmother_nt | TTD7PV_nt | OK | 8.01374 | 1.58494  | -2.33805 | -5.135  | 5.00E-05 | 0.000948525 | yes |
| SFRP1    | chr8:41119475-41166990   | TTD7PVmother_nt | TTD7PV_nt | OK | 59.8292 | 27.467   | -1.12315 | -3.6468 | 5.00E-05 | 0.000948525 | yes |
| SFRP4    | chr7:37945534-37956525   | TTD7PVmother_nt | TTD7PV_nt | OK | 18.548  | 0.267368 | -6.11629 | -9.9771 | 5.00E-05 | 0.000948525 | yes |
| SGIP1    | chr1:66999824-67210768   | TTD7PVmother_nt | TTD7PV_nt | OK | 2.6002  | 0.44234  | -2.55539 | -5.0421 | 5.00E-05 | 0.000948525 | yes |
| SGK1     | chr6:134490383-134639196 | TTD7PVmother_nt | TTD7PV_nt | OK | 118.61  | 47.0243  | -1.33475 | -4.0088 | 5.00E-05 | 0.000948525 | yes |
| SGK223   | chr8:8175257-8239257     | TTD7PVmother_nt | TTD7PV_nt | OK | 2.22559 | 0.745501 | -1.57791 | -3.2427 | 5.00E-05 | 0.000948525 | yes |
| SH2D5    | chr1:21046224-21059133   | TTD7PVmother_nt | TTD7PV_nt | OK | 5.13041 | 2.26241  | -1.18122 | -2.9304 | 5.00E-05 | 0.000948525 | yes |
| SH3BGR   | chr21:40817796-40887433  | TTD7PVmother_nt | TTD7PV_nt | OK | 3.22234 | 19.104   | 2.56769  | 5.1268  | 5.00E-05 | 0.000948525 | yes |
| SH3GL3   | chr15:84116090-84287493  | TTD7PVmother_nt | TTD7PV_nt | OK | 0.1721  | 0.621571 | 1.85271  | 1.95303 | 0.00205  | 0.0214716   | yes |
| SHANK2   | chr11:70313960-70935808  | TTD7PVmother_nt | TTD7PV_nt | OK | 0.45472 | 0.110188 | -2.04499 | -3.3743 | 5.00E-05 | 0.000948525 | yes |
| SHC2     | chr19:416582-460996      | TTD7PVmother_nt | TTD7PV_nt | OK | 2.46494 | 1.0706   | -1.20314 | -2.4385 | 0.0006   | 0.00798882  | yes |
| SHC3     | chr9:91620685-91793682   | TTD7PVmother_nt | TTD7PV_nt | OK | 1.20606 | 0.087781 | -3.78026 | -6.4636 | 5.00E-05 | 0.000948525 | yes |
| SIM1     | chr6:100836749-100911551 | TTD7PVmother_nt | TTD7PV_nt | OK | 0.03774 | 0.634678 | 4.0717   | 4.08404 | 0.00045  | 0.0062912   | yes |
| SLC16A2  | chrX:73641327-73753764   | TTD7PVmother_nt | TTD7PV_nt | OK | 26.8128 | 12.5088  | -1.09998 | -3.8238 | 5.00E-05 | 0.000948525 | yes |
| SLC16A3  | chr17:80186281-80197375  | TTD7PVmother_nt | TTD7PV_nt | OK | 72.4171 | 20.5634  | -1.81625 | -5.6818 | 5.00E-05 | 0.000948525 | yes |
| SLC16A9  | chr10:61410521-61469649  | TTD7PVmother_nt | TTD7PV_nt | OK | 0.07642 | 0.5025   | 2.71712  | 3.61184 | 0.0001   | 0.00172182  | yes |
| SLC25A30 | chr13:45967453-45992516  | TTD7PVmother_nt | TTD7PV_nt | OK | 7.92091 | 3.7706   | -1.07087 | -3.3174 | 5.00E-05 | 0.000948525 | yes |
| SLC2A8   | chr9:130159416-130170170 | TTD7PVmother_nt | TTD7PV_nt | OK | 4.63693 | 1.70063  | -1.4471  | -2.9272 | 5.00E-05 | 0.000948525 | yes |
| SLC30A4  | chr15:45774679-45848928  | TTD7PVmother_nt | TTD7PV_nt | OK | 1.0927  | 0.344463 | -1.66548 | -2.8524 | 5.00E-05 | 0.000948525 | yes |
| SLC31A2  | chr9:115913237-115926422 | TTD7PVmother_nt | TTD7PV_nt | OK | 25.8717 | 6.64202  | -1.96168 | -6.3186 | 5.00E-05 | 0.000948525 | yes |
| SLC40A1  | chr2:190425315-190445537 | TTD7PVmother_nt | TTD7PV_nt | OK | 5.11062 | 1.35163  | -1.9188  | -4.6542 | 5.00E-05 | 0.000948525 | yes |
| SLC44A3  | chr1:95285897-95360803   | TTD7PVmother_nt | TTD7PV_nt | OK | 0.90371 | 0.371103 | -1.28403 | -1.8516 | 0.00225  | 0.0230778   | yes |
| SLC4A3   | chr2:220492291-220506702 | TTD7PVmother_nt | TTD7PV_nt | OK | 2.16501 | 0.710137 | -1.6082  | -3.1471 | 5.00E-05 | 0.000948525 | yes |
| SLC4A4   | chr4:72053002-72437804   | TTD7PVmother_nt | TTD7PV_nt | OK | 2.37214 | 0.926574 | -1.35621 | -3.385  | 5.00E-05 | 0.000948525 | yes |
| SLC6A17  | chr1:110693131-110744823 | TTD7PVmother_nt | TTD7PV_nt | OK | 1.27242 | 0.460537 | -1.46618 | -3.0162 | 5.00E-05 | 0.000948525 | yes |
| SLC6A6   | chr3:14444105-14583588   | TTD7PVmother_nt | TTD7PV_nt | OK | 8.34442 | 3.53958  | -1.23723 | -3.3917 | 5.00E-05 | 0.000948525 | yes |
| SLC7A14  | chr3:170177341-170303863 | TTD7PVmother_nt | TTD7PV_nt | OK | 1.56095 | 0.523736 | -1.57551 | -3.767  | 5.00E-05 | 0.000948525 | yes |
| SLC7A5   | chr16:87863628-87903100  | TTD7PVmother_nt | TTD7PV_nt | OK | 28.9965 | 59.5616  | 1.0385   | 3.20309 | 5.00E-05 | 0.000948525 | yes |
| SLCO3A1  | chr15:92396937-92715665  | TTD7PVmother_nt | TTD7PV_nt | OK | 4.16789 | 1.53394  | -1.44208 | -3.2239 | 5.00E-05 | 0.000948525 | yes |
| SNCA     | chr4:90645249-90763142   | TTD7PVmother_nt | TTD7PV_nt | OK | 0.81368 | 0.353459 | -1.20291 | -1.7694 | 0.00275  | 0.0271038   | yes |
| SOGA3    | chr6:127759550-127840500 | TTD7PVmother_nt | TTD7PV_nt | OK | 0.49295 | 0.203518 | -1.27628 | -2.3704 | 0.0003   | 0.00450245  | yes |



|            |                          |                 |           |    |         |          |          |         |          |             |     |
|------------|--------------------------|-----------------|-----------|----|---------|----------|----------|---------|----------|-------------|-----|
| SORBS2     | chr4:186506597-186877870 | TTD7PVmother_nt | TTD7PV_nt | OK | 1.46862 | 0.270487 | -2.44083 | -3.9395 | 5.00E-05 | 0.000948525 | yes |
| SORT1      | chr1:109852187-109940563 | TTD7PVmother_nt | TTD7PV_nt | OK | 7.98407 | 2.19565  | -1.86248 | -5.5651 | 5.00E-05 | 0.000948525 | yes |
| SOX9       | chr17:70117160-70122560  | TTD7PVmother_nt | TTD7PV_nt | OK | 2.93712 | 7.37089  | 1.32744  | 3.97845 | 5.00E-05 | 0.000948525 | yes |
| SP9        | chr2:175199820-175202268 | TTD7PVmother_nt | TTD7PV_nt | OK | 7.16109 | 0.096643 | -6.21138 | -7.8359 | 0.00405  | 0.0370228   | yes |
| SPEG       | chr2:220299699-220358354 | TTD7PVmother_nt | TTD7PV_nt | OK | 11.7618 | 5.77422  | -1.02641 | -1.8472 | 0.0009   | 0.0110351   | yes |
| SPINT2     | chr19:38755097-38783254  | TTD7PVmother_nt | TTD7PV_nt | OK | 1.6515  | 0.646758 | -1.35248 | -1.9482 | 0.0018   | 0.0193091   | yes |
| SPON1      | chr11:13984183-14289679  | TTD7PVmother_nt | TTD7PV_nt | OK | 8.14221 | 3.74616  | -1.12001 | -3.3527 | 5.00E-05 | 0.000948525 | yes |
| SPON2      | chr4:1160720-1202750     | TTD7PVmother_nt | TTD7PV_nt | OK | 124.704 | 7.63915  | -4.02895 | -12.136 | 5.00E-05 | 0.000948525 | yes |
| SPP1       | chr4:88896801-88904563   | TTD7PVmother_nt | TTD7PV_nt | OK | 11.534  | 2.5052   | -2.20289 | -4.5426 | 5.00E-05 | 0.000948525 | yes |
| SPTBN4     | chr19:40973125-41082365  | TTD7PVmother_nt | TTD7PV_nt | OK | 0.60546 | 0.23609  | -1.35868 | -2.3104 | 5.00E-05 | 0.000948525 | yes |
| SQRDL      | chr15:45923345-45983492  | TTD7PVmother_nt | TTD7PV_nt | OK | 18.4028 | 9.13557  | -1.01036 | -2.7985 | 5.00E-05 | 0.000948525 | yes |
| SRGN       | chr10:70847827-70864567  | TTD7PVmother_nt | TTD7PV_nt | OK | 8.2191  | 2.03365  | -2.01491 | -3.4598 | 5.00E-05 | 0.000948525 | yes |
| ST6GALNAC3 | chr1:76540388-77096669   | TTD7PVmother_nt | TTD7PV_nt | OK | 0.16977 | 3.36473  | 4.30885  | 4.66062 | 5.00E-05 | 0.000948525 | yes |
| STARD8     | chrX:67867510-67945684   | TTD7PVmother_nt | TTD7PV_nt | OK | 1.01706 | 0.334942 | -1.60242 | -2.6583 | 5.00E-05 | 0.000948525 | yes |
| STC1       | chr8:23699433-23712320   | TTD7PVmother_nt | TTD7PV_nt | OK | 5.16938 | 2.349    | -1.13794 | -3.0774 | 5.00E-05 | 0.000948525 | yes |
| STC2       | chr5:172741725-172756506 | TTD7PVmother_nt | TTD7PV_nt | OK | 205.757 | 78.4832  | -1.39049 | -3.3388 | 5.00E-05 | 0.000948525 | yes |
| STEAP1B    | chr7:22459062-22539901   | TTD7PVmother_nt | TTD7PV_nt | OK | 6.12974 | 0.402589 | -3.92844 | -5.4746 | 5.00E-05 | 0.000948525 | yes |
| STK17B     | chr2:196998306-197036336 | TTD7PVmother_nt | TTD7PV_nt | OK | 7.76884 | 3.67877  | -1.07847 | -3.5532 | 5.00E-05 | 0.000948525 | yes |
| STMN2      | chr8:80523048-80578410   | TTD7PVmother_nt | TTD7PV_nt | OK | 200.81  | 6.34394  | -4.98431 | -12.535 | 5.00E-05 | 0.000948525 | yes |
| STX1B      | chr16:31000576-31021829  | TTD7PVmother_nt | TTD7PV_nt | OK | 1.02758 | 0.503266 | -1.02986 | -1.8939 | 0.00235  | 0.0239887   | yes |
| STXBP2     | chr19:7701986-7712760    | TTD7PVmother_nt | TTD7PV_nt | OK | 1.95292 | 0.268397 | -2.86319 | -3.4997 | 5.00E-05 | 0.000948525 | yes |
| STXBP6     | chr14:25281305-25519095  | TTD7PVmother_nt | TTD7PV_nt | OK | 2.48702 | 6.21599  | 1.32156  | 3.37462 | 5.00E-05 | 0.000948525 | yes |
| SUSD5      | chr3:33191536-33260707   | TTD7PVmother_nt | TTD7PV_nt | OK | 1.23544 | 0.258943 | -2.25432 | -4.0736 | 5.00E-05 | 0.000948525 | yes |
| SVEP1      | chr9:113127528-113342160 | TTD7PVmother_nt | TTD7PV_nt | OK | 18.1252 | 5.38465  | -1.75108 | -5.4867 | 5.00E-05 | 0.000948525 | yes |
| SYBU       | chr8:110586404-110704020 | TTD7PVmother_nt | TTD7PV_nt | OK | 4.98855 | 14.515   | 1.54085  | 4.21947 | 5.00E-05 | 0.000948525 | yes |
| SYNPO2     | chr4:119809995-119982402 | TTD7PVmother_nt | TTD7PV_nt | OK | 26.2425 | 2.84863  | -3.20356 | -9.0875 | 5.00E-05 | 0.000948525 | yes |
| SYT14      | chr1:210111518-210337633 | TTD7PVmother_nt | TTD7PV_nt | OK | 2.19479 | 5.47158  | 1.31787  | 3.61592 | 5.00E-05 | 0.000948525 | yes |
| SYT7       | chr11:61281187-61348344  | TTD7PVmother_nt | TTD7PV_nt | OK | 0.37741 | 0.844479 | 1.16194  | 1.94672 | 0.0015   | 0.0167911   | yes |
| TACSTD2    | chr1:59041094-59043166   | TTD7PVmother_nt | TTD7PV_nt | OK | 0.29811 | 1.61806  | 2.44037  | 3.98593 | 5.00E-05 | 0.000948525 | yes |
| TBC1D4     | chr13:75858808-76056250  | TTD7PVmother_nt | TTD7PV_nt | OK | 4.4031  | 2.18129  | -1.01333 | -3.0318 | 5.00E-05 | 0.000948525 | yes |
| TBX1       | chr22:19744225-19771112  | TTD7PVmother_nt | TTD7PV_nt | OK | 8.23641 | 0.499552 | -4.04331 | -7.0694 | 5.00E-05 | 0.000948525 | yes |
| TBXA2R     | chr19:3594503-3606831    | TTD7PVmother_nt | TTD7PV_nt | OK | 1.9785  | 0.878736 | -1.1709  | -2.2422 | 0.001    | 0.0119535   | yes |
| TCEAL7     | chrX:102585113-102587251 | TTD7PVmother_nt | TTD7PV_nt | OK | 10.4855 | 4.35464  | -1.26777 | -3.5795 | 5.00E-05 | 0.000948525 | yes |

|          |                           |                 |           |    |         |          |          |         |          |             |     |
|----------|---------------------------|-----------------|-----------|----|---------|----------|----------|---------|----------|-------------|-----|
| TCF21    | chr6:134210258-134216675  | TTD7PVmother_nt | TTD7PV_nt | OK | 0.19479 | 2.84177  | 3.86683  | 3.83971 | 5.00E-05 | 0.000948525 | yes |
| TCTEX1D1 | chr1:67218139-67244730    | TTD7PVmother_nt | TTD7PV_nt | OK | 1.03304 | 0.38429  | -1.42663 | -2.5339 | 0.00135  | 0.0154207   | yes |
| TEKT4P2  | chr21:9907188-9968593     | TTD7PVmother_nt | TTD7PV_nt | OK | 27.6257 | 7.73593  | -1.83637 | -4.5097 | 5.00E-05 | 0.000948525 | yes |
| TFAP2A   | chr6:10396915-10419797    | TTD7PVmother_nt | TTD7PV_nt | OK | 1.11338 | 0.110095 | -3.33812 | -4.5903 | 5.00E-05 | 0.000948525 | yes |
| TFPI2    | chr7:93514708-93520303    | TTD7PVmother_nt | TTD7PV_nt | OK | 84.2107 | 20.423   | -2.04381 | -6.7394 | 5.00E-05 | 0.000948525 | yes |
| TGFA     | chr2:70674411-70781147    | TTD7PVmother_nt | TTD7PV_nt | OK | 0.45441 | 0.09746  | -2.22111 | -2.8093 | 0.0002   | 0.00323166  | yes |
| TGM2     | chr20:36756863-36793700   | TTD7PVmother_nt | TTD7PV_nt | OK | 35.6287 | 5.62236  | -2.66379 | -6.8757 | 5.00E-05 | 0.000948525 | yes |
| THBD     | chr20:23026269-23030301   | TTD7PVmother_nt | TTD7PV_nt | OK | 13.1317 | 33.6978  | 1.3596   | 4.95933 | 5.00E-05 | 0.000948525 | yes |
| THBS2    | chr6:169615874-169654137  | TTD7PVmother_nt | TTD7PV_nt | OK | 181.307 | 70.4835  | -1.36307 | -3.3995 | 5.00E-05 | 0.000948525 | yes |
| THEMIS2  | chr1:28199054-28213193    | TTD7PVmother_nt | TTD7PV_nt | OK | 1.34179 | 0.576761 | -1.21812 | -1.5188 | 0.00475  | 0.0417883   | yes |
| TIPARP   | chr3:156390959-156424557  | TTD7PVmother_nt | TTD7PV_nt | OK | 11.9254 | 5.4363   | -1.13334 | -3.3107 | 5.00E-05 | 0.000948525 | yes |
| TJP2     | chr9:71736179-71870124    | TTD7PVmother_nt | TTD7PV_nt | OK | 2.05363 | 4.65019  | 1.17911  | 2.86883 | 5.00E-05 | 0.000948525 | yes |
| TLR4     | chr9:120466452-120479769  | TTD7PVmother_nt | TTD7PV_nt | OK | 2.34684 | 0.228879 | -3.35806 | -6.1199 | 5.00E-05 | 0.000948525 | yes |
| TM4SF1   | chr3:149086804-149095568  | TTD7PVmother_nt | TTD7PV_nt | OK | 11.4285 | 1.68398  | -2.76268 | -6.7682 | 5.00E-05 | 0.000948525 | yes |
| TMEM150C | chr4:83405603-83483126    | TTD7PVmother_nt | TTD7PV_nt | OK | 0.52075 | 0.177183 | -1.55536 | -2.0591 | 0.00565  | 0.0478409   | yes |
| TMEM155  | chr4:122680084-122687963  | TTD7PVmother_nt | TTD7PV_nt | OK | 4.0581  | 9.46465  | 1.22175  | 3.3881  | 5.00E-05 | 0.000948525 | yes |
| TMEM180  | chr10:104221169-104236802 | TTD7PVmother_nt | TTD7PV_nt | OK | 1.0296  | 0.487025 | -1.08002 | -1.9419 | 0.00435  | 0.0390438   | yes |
| TMEM229B | chr14:67936982-67982021   | TTD7PVmother_nt | TTD7PV_nt | OK | 0.58567 | 0.181251 | -1.6921  | -2.5512 | 0.00065  | 0.00852222  | yes |
| TMEM255B | chr13:114462215-114514899 | TTD7PVmother_nt | TTD7PV_nt | OK | 9.63101 | 1.52017  | -2.66346 | -6.1505 | 5.00E-05 | 0.000948525 | yes |
| TMEM35   | chrX:100333835-100351355  | TTD7PVmother_nt | TTD7PV_nt | OK | 1.45078 | 0.49378  | -1.55489 | -2.5873 | 0.0003   | 0.00450245  | yes |
| TMEM51   | chr1:15479027-15546974    | TTD7PVmother_nt | TTD7PV_nt | OK | 0.72262 | 0.076917 | -3.23186 | -2.2193 | 5.00E-05 | 0.000948525 | yes |
| TMEM59L  | chr19:18723681-18731849   | TTD7PVmother_nt | TTD7PV_nt | OK | 3.11529 | 0.520603 | -2.58111 | -4.3653 | 5.00E-05 | 0.000948525 | yes |
| TMTC1    | chr12:29653745-29937692   | TTD7PVmother_nt | TTD7PV_nt | OK | 14.2521 | 4.59455  | -1.63318 | -4.7787 | 5.00E-05 | 0.000948525 | yes |
| TNFAIP6  | chr2:152214105-152236562  | TTD7PVmother_nt | TTD7PV_nt | OK | 6.86475 | 15.4734  | 1.17251  | 2.9344  | 5.00E-05 | 0.000948525 | yes |
| TNFRSF14 | chr1:2487207-2495267      | TTD7PVmother_nt | TTD7PV_nt | OK | 8.46328 | 2.77614  | -1.60814 | -3.4301 | 5.00E-05 | 0.000948525 | yes |
| TNFRSF21 | chr6:47199267-47277680    | TTD7PVmother_nt | TTD7PV_nt | OK | 10.9916 | 3.66241  | -1.58554 | -4.9452 | 5.00E-05 | 0.000948525 | yes |
| TNFSF4   | chr1:173152869-173176471  | TTD7PVmother_nt | TTD7PV_nt | OK | 1.11328 | 0.28359  | -1.97294 | -3.4498 | 5.00E-05 | 0.000948525 | yes |
| TOX      | chr8:59717976-60031767    | TTD7PVmother_nt | TTD7PV_nt | OK | 0.13382 | 3.58582  | 4.74396  | 7.71038 | 5.00E-05 | 0.000948525 | yes |
| TP53I11  | chr11:44785975-44972857   | TTD7PVmother_nt | TTD7PV_nt | OK | 15.7156 | 4.91924  | -1.67569 | -2.528  | 5.00E-05 | 0.000948525 | yes |
| TPD52    | chr8:80947104-81083836    | TTD7PVmother_nt | TTD7PV_nt | OK | 0.07551 | 1.04569  | 3.79162  | 4.67649 | 5.00E-05 | 0.000948525 | yes |
| TRPC3    | chr4:122800182-122872909  | TTD7PVmother_nt | TTD7PV_nt | OK | 0.1169  | 0.562814 | 2.26742  | 2.85517 | 0.0001   | 0.00172182  | yes |
| TRPV2    | chr17:16318855-16340317   | TTD7PVmother_nt | TTD7PV_nt | OK | 6.36265 | 0.561976 | -3.50105 | -6.817  | 5.00E-05 | 0.000948525 | yes |
| TSPAN10  | chr17:79609348-79615779   | TTD7PVmother_nt | TTD7PV_nt | OK | 3.42324 | 1.69835  | -1.01123 | -2.2454 | 0.00305  | 0.0293851   | yes |

|         |                           |                 |           |    |         |          |          |         |          |             |     |
|---------|---------------------------|-----------------|-----------|----|---------|----------|----------|---------|----------|-------------|-----|
| TSPAN13 | chr7:16793350-16824161    | TTD7PVmother_nt | TTD7PV_nt | OK | 6.71023 | 2.20272  | -1.60707 | -4.2555 | 5.00E-05 | 0.000948525 | yes |
| TSPAN2  | chr1:115590632-115632121  | TTD7PVmother_nt | TTD7PV_nt | OK | 1.24413 | 0.542489 | -1.19747 | -2.2748 | 0.0016   | 0.0176494   | yes |
| TSPAN8  | chr12:71518876-71551779   | TTD7PVmother_nt | TTD7PV_nt | OK | 0.32113 | 2.47883  | 2.94845  | 4.95911 | 0.00015  | 0.00249264  | yes |
| TTC12   | chr11:113185250-113237114 | TTD7PVmother_nt | TTD7PV_nt | OK | 0.34974 | 2.27989  | 2.70461  | 4.39352 | 5.00E-05 | 0.000948525 | yes |
| TYW1B   | chr7:72023728-72298813    | TTD7PVmother_nt | TTD7PV_nt | OK | 0.28017 | 1.12033  | 1.99954  | 2.86688 | 5.00E-05 | 0.000948525 | yes |
| UCHL1   | chr4:41258897-41270446    | TTD7PVmother_nt | TTD7PV_nt | OK | 183.968 | 412.162  | 1.16375  | 4.51807 | 5.00E-05 | 0.000948525 | yes |
| ULBP1   | chr6:150285142-150294846  | TTD7PVmother_nt | TTD7PV_nt | OK | 3.23612 | 9.56167  | 1.563    | 4.23553 | 5.00E-05 | 0.000948525 | yes |
| USP53   | chr4:120133781-120216673  | TTD7PVmother_nt | TTD7PV_nt | OK | 17.5468 | 8.5755   | -1.03292 | -3.488  | 5.00E-05 | 0.000948525 | yes |
| VAMP1   | chr12:6561176-6579843     | TTD7PVmother_nt | TTD7PV_nt | OK | 7.04566 | 2.55494  | -1.46345 | -2.0117 | 0.0016   | 0.0176494   | yes |
| VIT     | chr2:36923832-37041937    | TTD7PVmother_nt | TTD7PV_nt | OK | 6.20462 | 0.453921 | -3.77283 | -5.7514 | 5.00E-05 | 0.000948525 | yes |
| WARS    | chr14:100800124-100842680 | TTD7PVmother_nt | TTD7PV_nt | OK | 83.6578 | 168.075  | 1.00653  | 2.76578 | 5.00E-05 | 0.000948525 | yes |
| WISP1   | chr8:134203281-134243932  | TTD7PVmother_nt | TTD7PV_nt | OK | 16.1645 | 34.1607  | 1.07951  | 3.3401  | 5.00E-05 | 0.000948525 | yes |
| WISP2   | chr20:43343884-43356452   | TTD7PVmother_nt | TTD7PV_nt | OK | 321.903 | 20.9801  | -3.93953 | -12.705 | 5.00E-05 | 0.000948525 | yes |
| WNK4    | chr17:40932648-40949084   | TTD7PVmother_nt | TTD7PV_nt | OK | 3.3567  | 0.272402 | -3.62323 | -5.75   | 5.00E-05 | 0.000948525 | yes |
| WNT4    | chr1:22443797-22469519    | TTD7PVmother_nt | TTD7PV_nt | OK | 1.26139 | 0.145119 | -3.1197  | -4.5156 | 5.00E-05 | 0.000948525 | yes |
| WNT5B   | chr12:1726221-1756378     | TTD7PVmother_nt | TTD7PV_nt | OK | 64.2678 | 21.9474  | -1.55005 | -4.7919 | 5.00E-05 | 0.000948525 | yes |
| XG      | chrX:2670092-2734541      | TTD7PVmother_nt | TTD7PV_nt | OK | 25.7924 | 9.48844  | -1.4427  | -4.8165 | 5.00E-05 | 0.000948525 | yes |
| XPNPEP2 | chrX:128872945-128903525  | TTD7PVmother_nt | TTD7PV_nt | OK | 1.7466  | 8.21925  | 2.23445  | 5.52017 | 5.00E-05 | 0.000948525 | yes |
| ZDHC23  | chr3:113666747-113681827  | TTD7PVmother_nt | TTD7PV_nt | OK | 1.01663 | 0.46992  | -1.11331 | -2.0303 | 0.00195  | 0.0205581   | yes |
| ZFPM2   | chr8:106331146-106816767  | TTD7PVmother_nt | TTD7PV_nt | OK | 4.57716 | 0.83977  | -2.44639 | -5.509  | 5.00E-05 | 0.000948525 | yes |
| ZIC4    | chr3:147103834-147124596  | TTD7PVmother_nt | TTD7PV_nt | OK | 0.04164 | 1.48733  | 5.15859  | 3.57072 | 5.00E-05 | 0.000948525 | yes |
| ZNF273  | chr7:64363619-64391955    | TTD7PVmother_nt | TTD7PV_nt | OK | 0.70586 | 0.254975 | -1.46902 | -2.3952 | 0.0001   | 0.00172182  | yes |
| ZNF385B | chr2:180306710-180726232  | TTD7PVmother_nt | TTD7PV_nt | OK | 0.07728 | 0.848017 | 3.45594  | 3.22416 | 5.00E-05 | 0.000948525 | yes |
| ZNF608  | chr5:123972609-124080805  | TTD7PVmother_nt | TTD7PV_nt | OK | 0.46165 | 0.076368 | -2.59577 | -3.4888 | 5.00E-05 | 0.000948525 | yes |
| ZNF702P | chr19:53471503-53496784   | TTD7PVmother_nt | TTD7PV_nt | OK | 1.1967  | 0.184426 | -2.69795 | -4.1685 | 5.00E-05 | 0.000948525 | yes |
| ZNF711  | chrX:84498996-84528368    | TTD7PVmother_nt | TTD7PV_nt | OK | 0.30698 | 0.676225 | 1.13938  | 1.88977 | 0.0046   | 0.0408317   | yes |
| ZNF804A | chr2:185463092-185804214  | TTD7PVmother_nt | TTD7PV_nt | OK | 0.16825 | 1.29104  | 2.93988  | 4.89199 | 5.00E-05 | 0.000948525 | yes |

**Table S2.** The most significant differentially expressed genes (P-value  $\leq 0.05$ ) for TTD7Pvmother versus TTD7PV fibroblasts upon UV irradiation by RNA-seq

| test_id  | locus                     | sample_1        | sample_2  | status | value_1  | value_2  | log2(FC) | test_stat | p_value  | q_value     | significant |
|----------|---------------------------|-----------------|-----------|--------|----------|----------|----------|-----------|----------|-------------|-------------|
| A2M      | chr12:9217772-9268558     | TTD7Pvmother_uv | TTD7PV_uv | OK     | 1.52284  | 0.430276 | -1.82343 | -2.85205  | 0.0002   | 0.00284504  | yes         |
| AARD     | chr8:117950463-117956239  | TTD7Pvmother_uv | TTD7PV_uv | OK     | 0.950153 | 0.264253 | -1.84624 | -2.64737  | 0.00085  | 0.00936112  | yes         |
| ABAT     | chr16:8768443-8878432     | TTD7Pvmother_uv | TTD7PV_uv | OK     | 4.64583  | 1.36945  | -1.76234 | -4.41025  | 5.00E-05 | 0.000851213 | yes         |
| ABCC9    | chr12:21950323-22089628   | TTD7Pvmother_uv | TTD7PV_uv | OK     | 6.97797  | 1.44135  | -2.27539 | -6.73859  | 5.00E-05 | 0.000851213 | yes         |
| ABLIM1   | chr10:116190868-116444414 | TTD7Pvmother_uv | TTD7PV_uv | OK     | 0.697137 | 0.316855 | -1.13762 | -2.16618  | 0.0002   | 0.00284504  | yes         |
| ACBD7    | chr10:15117473-15130775   | TTD7Pvmother_uv | TTD7PV_uv | OK     | 0.366453 | 0.89426  | 1.28707  | 2.3637    | 0.00045  | 0.00555117  | yes         |
| ACOT1    | chr14:73945188-74025651   | TTD7Pvmother_uv | TTD7PV_uv | OK     | 9.94537  | 3.25485  | -1.61143 | -2.90412  | 5.00E-05 | 0.000851213 | yes         |
| ADAMTS7  | chr15:79051544-79103773   | TTD7Pvmother_uv | TTD7PV_uv | OK     | 13.3688  | 5.23042  | -1.35387 | -4.22599  | 5.00E-05 | 0.000851213 | yes         |
| ADARB1   | chr21:46494492-46646478   | TTD7Pvmother_uv | TTD7PV_uv | OK     | 6.64512  | 2.83128  | -1.23084 | -3.25214  | 5.00E-05 | 0.000851213 | yes         |
| ADCY4    | chr14:24787554-24804277   | TTD7Pvmother_uv | TTD7PV_uv | OK     | 3.97065  | 1.18093  | -1.74945 | -3.80925  | 5.00E-05 | 0.000851213 | yes         |
| ADD2     | chr2:70889215-70995375    | TTD7Pvmother_uv | TTD7PV_uv | OK     | 0.590122 | 1.99578  | 1.75786  | 3.00926   | 5.00E-05 | 0.000851213 | yes         |
| ADH1B    | chr4:100227526-100242572  | TTD7Pvmother_uv | TTD7PV_uv | OK     | 0.931315 | 4.02521  | 2.11172  | 4.31614   | 5.00E-05 | 0.000851213 | yes         |
| ADM      | chr11:10326641-10328923   | TTD7Pvmother_uv | TTD7PV_uv | OK     | 231.492  | 62.266   | -1.89445 | -7.1941   | 5.00E-05 | 0.000851213 | yes         |
| ADRA1B   | chr5:159343739-159400017  | TTD7Pvmother_uv | TTD7PV_uv | OK     | 0.52196  | 1.54011  | 1.56102  | 2.91711   | 0.00025  | 0.00340302  | yes         |
| ADRA2A   | chr10:112836789-112840662 | TTD7Pvmother_uv | TTD7PV_uv | OK     | 17.6498  | 2.75229  | -2.68095 | -8.22116  | 5.00E-05 | 0.000851213 | yes         |
| AFF2     | chrX:147582138-148082193  | TTD7Pvmother_uv | TTD7PV_uv | OK     | 0.645679 | 1.29963  | 1.00922  | 2.58991   | 5.00E-05 | 0.000851213 | yes         |
| AFF3     | chr2:100163715-100759037  | TTD7Pvmother_uv | TTD7PV_uv | OK     | 0.859116 | 2.26038  | 1.39564  | 3.26434   | 5.00E-05 | 0.000851213 | yes         |
| AGTR1    | chr3:148415657-148460790  | TTD7Pvmother_uv | TTD7PV_uv | OK     | 0.477224 | 3.86252  | 3.0168   | 5.19801   | 5.00E-05 | 0.000851213 | yes         |
| AHR      | chr7:17338275-17385775    | TTD7Pvmother_uv | TTD7PV_uv | OK     | 5.51531  | 2.55833  | -1.10824 | -3.48898  | 5.00E-05 | 0.000851213 | yes         |
| AIM1     | chr6:106959729-107018334  | TTD7Pvmother_uv | TTD7PV_uv | OK     | 1.16744  | 2.93692  | 1.33095  | 3.58087   | 5.00E-05 | 0.000851213 | yes         |
| AKAP2    | chr9:112403067-112934791  | TTD7Pvmother_uv | TTD7PV_uv | OK     | 57.7924  | 28.7928  | -1.00517 | -2.64574  | 5.00E-05 | 0.000851213 | yes         |
| AKR1C2   | chr10:5029967-5060225     | TTD7Pvmother_uv | TTD7PV_uv | OK     | 25.6547  | 10.8687  | -1.23904 | -3.48911  | 5.00E-05 | 0.000851213 | yes         |
| ALDH1A1  | chr9:75515577-75568233    | TTD7Pvmother_uv | TTD7PV_uv | OK     | 0.30471  | 1.0351   | 1.76426  | 2.68115   | 0.0005   | 0.00606142  | yes         |
| ALDH1A3  | chr15:101420008-101456830 | TTD7Pvmother_uv | TTD7PV_uv | OK     | 59.8689  | 215.968  | 1.85094  | 5.58943   | 5.00E-05 | 0.000851213 | yes         |
| ALDH1B1  | chr9:38392660-38398662    | TTD7Pvmother_uv | TTD7PV_uv | OK     | 33.6117  | 12.6644  | -1.40818 | -4.51698  | 5.00E-05 | 0.000851213 | yes         |
| ALDH2    | chr12:112204690-112247789 | TTD7Pvmother_uv | TTD7PV_uv | OK     | 25.3649  | 68.6364  | 1.43614  | 4.4823    | 5.00E-05 | 0.000851213 | yes         |
| ALDH3B1  | chr11:67776047-67796743   | TTD7Pvmother_uv | TTD7PV_uv | OK     | 18.4272  | 6.0333   | -1.61082 | -4.73448  | 5.00E-05 | 0.000851213 | yes         |
| ALS2CL   | chr3:46710484-46735194    | TTD7Pvmother_uv | TTD7PV_uv | OK     | 1.1765   | 0.228269 | -2.3657  | -3.77933  | 5.00E-05 | 0.000851213 | yes         |
| AMIGO1   | chr1:110049445-110052336  | TTD7Pvmother_uv | TTD7PV_uv | OK     | 0.971133 | 0.145638 | -2.73729 | -3.79324  | 5.00E-05 | 0.000851213 | yes         |
| AMIGO2   | chr12:47469489-47473734   | TTD7Pvmother_uv | TTD7PV_uv | OK     | 18.2828  | 8.79016  | -1.05652 | -2.99488  | 5.00E-05 | 0.000851213 | yes         |
| AMPD3    | chr11:10471867-10529126   | TTD7Pvmother_uv | TTD7PV_uv | OK     | 4.77333  | 1.69759  | -1.49151 | -3.76068  | 5.00E-05 | 0.000851213 | yes         |
| ANGPT1   | chr8:108261709-108510254  | TTD7Pvmother_uv | TTD7PV_uv | OK     | 4.24164  | 0.859519 | -2.30302 | -5.27843  | 5.00E-05 | 0.000851213 | yes         |
| ANGPTL4  | chr19:8429010-8439257     | TTD7Pvmother_uv | TTD7PV_uv | OK     | 45.2612  | 10.6133  | -2.0924  | -6.13833  | 5.00E-05 | 0.000851213 | yes         |
| ANKRD33B | chr5:10564434-10657928    | TTD7Pvmother_uv | TTD7PV_uv | OK     | 0.547212 | 0.245433 | -1.15677 | -2.26578  | 0.00045  | 0.00555117  | yes         |
| ANO4     | chr12:101188373-101522419 | TTD7Pvmother_uv | TTD7PV_uv | OK     | 1.14636  | 0.390158 | -1.55493 | -2.98779  | 5.00E-05 | 0.000851213 | yes         |

|             |                               |                 |           |    |          |           |          |          |          |             |     |
|-------------|-------------------------------|-----------------|-----------|----|----------|-----------|----------|----------|----------|-------------|-----|
| ANP32A      | chr15:69070874-69113261       | TTD7PVmother_uv | TTD7PV_uv | OK | 10.9588  | 23.6534   | 1.10996  | 3.78594  | 5.00E-05 | 0.000851213 | yes |
| AP1S2       | chrX:15843928-15873137        | TTD7PVmother_uv | TTD7PV_uv | OK | 20.359   | 8.8773    | -1.19748 | -3.81703 | 5.00E-05 | 0.000851213 | yes |
| APBA1       | chr9:72042448-72287275        | TTD7PVmother_uv | TTD7PV_uv | OK | 0.920413 | 0.452691  | -1.02376 | -2.11842 | 0.0006   | 0.00701778  | yes |
| APBB1IP     | chr10:26727265-26856732       | TTD7PVmother_uv | TTD7PV_uv | OK | 24.4563  | 5.83912   | -2.06638 | -6.64009 | 5.00E-05 | 0.000851213 | yes |
| APCDD1      | chr18:10454624-10488698       | TTD7PVmother_uv | TTD7PV_uv | OK | 3.78353  | 1.52823   | -1.30787 | -3.00134 | 5.00E-05 | 0.000851213 | yes |
| APCDD1L     | chr20:57034425-57089949       | TTD7PVmother_uv | TTD7PV_uv | OK | 6.60429  | 0.954329  | -2.79084 | -6.7716  | 5.00E-05 | 0.000851213 | yes |
| APOL1       | chr22:36649116-36663577       | TTD7PVmother_uv | TTD7PV_uv | OK | 4.22048  | 0.367587  | -3.52125 | -5.89482 | 5.00E-05 | 0.000851213 | yes |
| AQP1        | chr7:30951414-30965131        | TTD7PVmother_uv | TTD7PV_uv | OK | 1.31947  | 0.432841  | -1.60805 | -2.55498 | 5.00E-05 | 0.000851213 | yes |
| AR          | chrX:66763873-66950461        | TTD7PVmother_uv | TTD7PV_uv | OK | 0.935597 | 0.0557363 | -4.0692  | -6.31396 | 5.00E-05 | 0.000851213 | yes |
| ARC         | chr8:143692404-143695833      | TTD7PVmother_uv | TTD7PV_uv | OK | 9.85971  | 3.5021    | -1.49332 | -4.33446 | 5.00E-05 | 0.000851213 | yes |
| ARHGAP22    | chr10:49654067-49864310       | TTD7PVmother_uv | TTD7PV_uv | OK | 6.5942   | 2.60795   | -1.33828 | -3.22129 | 5.00E-05 | 0.000851213 | yes |
| ARHGAP23    | chr17:36584719-36668628       | TTD7PVmother_uv | TTD7PV_uv | OK | 21.4759  | 43.9557   | 1.03333  | 3.41901  | 5.00E-05 | 0.000851213 | yes |
| ARHGAP5-AS1 | chr14:32544624-32545905       | TTD7PVmother_uv | TTD7PV_uv | OK | 1.75832  | 0.772865  | -1.18591 | -2.28425 | 0.0038   | 0.031251    | yes |
| ARHGEF28    | chr5:72921982-73237818        | TTD7PVmother_uv | TTD7PV_uv | OK | 1.82098  | 0.521971  | -1.80267 | -3.77867 | 5.00E-05 | 0.000851213 | yes |
| ARL4D       | chr17:41476352-41478504       | TTD7PVmother_uv | TTD7PV_uv | OK | 30.2666  | 11.284    | -1.42345 | -4.95695 | 5.00E-05 | 0.000851213 | yes |
| ARRB1       | chr11:74971165-75062875       | TTD7PVmother_uv | TTD7PV_uv | OK | 1.17994  | 0.285815  | -2.04555 | -3.95705 | 5.00E-05 | 0.000851213 | yes |
| ARRDC4      | chr15:98503932-98517068       | TTD7PVmother_uv | TTD7PV_uv | OK | 3.73007  | 1.48325   | -1.33044 | -3.51847 | 5.00E-05 | 0.000851213 | yes |
| ASNS        | chr7:97481428-97501854        | TTD7PVmother_uv | TTD7PV_uv | OK | 44.1554  | 107.873   | 1.28868  | 3.82662  | 5.00E-05 | 0.000851213 | yes |
| ASPHD1      | chr16:29912146-29917377       | TTD7PVmother_uv | TTD7PV_uv | OK | 3.31486  | 1.51634   | -1.12836 | -2.40271 | 0.00095  | 0.0102305   | yes |
| ASS1        | chr9:133320093-133376661      | TTD7PVmother_uv | TTD7PV_uv | OK | 16.4517  | 52.3805   | 1.6708   | 4.77038  | 5.00E-05 | 0.000851213 | yes |
| ATF5        | chr19:50392912-50437193       | TTD7PVmother_uv | TTD7PV_uv | OK | 102.628  | 42.804    | -1.2616  | -3.19904 | 5.00E-05 | 0.000851213 | yes |
| ATP13A3     | chr3:194123402-194188968      | TTD7PVmother_uv | TTD7PV_uv | OK | 44.2476  | 20.2746   | -1.12593 | -3.88875 | 5.00E-05 | 0.000851213 | yes |
| ATP8B4      | chr15:50150434-50411419       | TTD7PVmother_uv | TTD7PV_uv | OK | 0.778892 | 0.217481  | -1.84053 | -3.13179 | 5.00E-05 | 0.000851213 | yes |
| B3GALT4     | chr6_qbl_hap6:4477155-4478841 | TTD7PVmother_uv | TTD7PV_uv | OK | 1.93583  | 0.80185   | -1.27155 | -2.45366 | 0.0012   | 0.0124046   | yes |
| B3GNT2      | chr2:62423261-62451866        | TTD7PVmother_uv | TTD7PV_uv | OK | 4.66353  | 2.06076   | -1.17824 | -2.76402 | 5.00E-05 | 0.000851213 | yes |
| B3GNT8      | chr19:41931263-41934635       | TTD7PVmother_uv | TTD7PV_uv | OK | 2.54687  | 0.904505  | -1.49353 | -3.08609 | 5.00E-05 | 0.000851213 | yes |
| BAI2        | chr1:32192717-32229648        | TTD7PVmother_uv | TTD7PV_uv | OK | 3.11821  | 1.18345   | -1.39771 | -3.44448 | 5.00E-05 | 0.000851213 | yes |
| BCHE        | chr3:165490691-165555253      | TTD7PVmother_uv | TTD7PV_uv | OK | 1.54009  | 6.00409   | 1.96293  | 4.89581  | 5.00E-05 | 0.000851213 | yes |
| BEAN1       | chr16:66461199-66527432       | TTD7PVmother_uv | TTD7PV_uv | OK | 1.0333   | 0.11025   | -3.22841 | -2.37592 | 5.00E-05 | 0.000851213 | yes |
| BEX2        | chrX:102564273-102565974      | TTD7PVmother_uv | TTD7PV_uv | OK | 0.868505 | 3.20389   | 1.88322  | 2.50456  | 0.00015  | 0.00220839  | yes |
| BMP2        | chr20:6748744-6760910         | TTD7PVmother_uv | TTD7PV_uv | OK | 2.60866  | 0.6973    | -1.90346 | -4.02792 | 5.00E-05 | 0.000851213 | yes |
| BMP4        | chr14:54416454-54423554       | TTD7PVmother_uv | TTD7PV_uv | OK | 0.708039 | 0.0976596 | -2.858   | -2.19159 | 0.0006   | 0.00701778  | yes |
| BTN2A2      | chr6:26383323-26395100        | TTD7PVmother_uv | TTD7PV_uv | OK | 2.75186  | 1.25859   | -1.12859 | -2.24057 | 5.00E-05 | 0.000851213 | yes |
| BTN3A2      | chr6:26365397-26378548        | TTD7PVmother_uv | TTD7PV_uv | OK | 2.21323  | 4.5177    | 1.02944  | 2.46428  | 5.00E-05 | 0.000851213 | yes |
| C11orf87    | chr11:109292845-109299893     | TTD7PVmother_uv | TTD7PV_uv | OK | 0.934176 | 2.92162   | 1.645    | 4.43485  | 5.00E-05 | 0.000851213 | yes |
| C15orf39    | chr15:75494220-75504510       | TTD7PVmother_uv | TTD7PV_uv | OK | 9.98978  | 4.19079   | -1.25323 | -3.96736 | 5.00E-05 | 0.000851213 | yes |
| C17orf97    | chr17:260117-264457           | TTD7PVmother_uv | TTD7PV_uv | OK | 1.11566  | 2.55002   | 1.19261  | 2.53544  | 0.00055  | 0.00656053  | yes |

|          |                           |                 |           |    |          |           |          |          |          |             |     |
|----------|---------------------------|-----------------|-----------|----|----------|-----------|----------|----------|----------|-------------|-----|
| C1orf115 | chr1:220863627-220872499  | TTD7PVmother_uv | TTD7PV_uv | OK | 3.39137  | 0.618734  | -2.45448 | -5.05966 | 5.00E-05 | 0.000851213 | yes |
| C1orf198 | chr1:230972864-231005335  | TTD7PVmother_uv | TTD7PV_uv | OK | 47.7942  | 19.5052   | -1.29298 | -3.95671 | 5.00E-05 | 0.000851213 | yes |
| C1orf54  | chr1:150245182-150253335  | TTD7PVmother_uv | TTD7PV_uv | OK | 2.0117   | 5.6945    | 1.50115  | 4.28306  | 0.0014   | 0.0141027   | yes |
| C1QTNF1  | chr17:77015290-77045870   | TTD7PVmother_uv | TTD7PV_uv | OK | 6.36637  | 1.56252   | -2.0266  | -4.63388 | 5.00E-05 | 0.000851213 | yes |
| C21orf7  | chr21:30452872-30548202   | TTD7PVmother_uv | TTD7PV_uv | OK | 9.64783  | 4.01269   | -1.26563 | -3.75062 | 5.00E-05 | 0.000851213 | yes |
| C2orf74  | chr2:61372242-61391964    | TTD7PVmother_uv | TTD7PV_uv | OK | 4.45218  | 10.6407   | 1.25701  | 2.31286  | 5.00E-05 | 0.000851213 | yes |
| C2orf88  | chr2:191002485-191068210  | TTD7PVmother_uv | TTD7PV_uv | OK | 0.800392 | 0.297894  | -1.42591 | -2.41848 | 0.00015  | 0.00220839  | yes |
| C3       | chr19:6677845-6720662     | TTD7PVmother_uv | TTD7PV_uv | OK | 1.87264  | 4.09972   | 1.13045  | 2.82277  | 5.00E-05 | 0.000851213 | yes |
| C3orf55  | chr3:157261132-157319021  | TTD7PVmother_uv | TTD7PV_uv | OK | 6.01258  | 1.48559   | -2.01695 | -3.43984 | 5.00E-05 | 0.000851213 | yes |
| C3orf72  | chr3:138666075-138672830  | TTD7PVmother_uv | TTD7PV_uv | OK | 1.46064  | 0.191433  | -2.93169 | -5.17932 | 5.00E-05 | 0.000851213 | yes |
| C5AR1    | chr19:47813103-47825327   | TTD7PVmother_uv | TTD7PV_uv | OK | 0.344526 | 0.815811  | 1.24362  | 2.09508  | 0.0041   | 0.0331146   | yes |
| C5AR2    | chr19:47835403-47845272   | TTD7PVmother_uv | TTD7PV_uv | OK | 1.29003  | 0.242704  | -2.41013 | -2.585   | 0.0001   | 0.00155758  | yes |
| C7orf60  | chr7:112459201-112579932  | TTD7PVmother_uv | TTD7PV_uv | OK | 6.38275  | 2.75971   | -1.20966 | -3.83332 | 5.00E-05 | 0.000851213 | yes |
| C8orf58  | chr8:22457113-22461662    | TTD7PVmother_uv | TTD7PV_uv | OK | 7.7722   | 3.63701   | -1.09557 | -2.62817 | 5.00E-05 | 0.000851213 | yes |
| CABLES1  | chr18:20714527-20840434   | TTD7PVmother_uv | TTD7PV_uv | OK | 7.92456  | 3.73623   | -1.08475 | -3.22765 | 5.00E-05 | 0.000851213 | yes |
| CADM1    | chr11:115044344-115375241 | TTD7PVmother_uv | TTD7PV_uv | OK | 0.266796 | 0.687527  | 1.36568  | 2.26588  | 0.00065  | 0.00748478  | yes |
| CALB2    | chr16:71392615-71424342   | TTD7PVmother_uv | TTD7PV_uv | OK | 0.821033 | 0.143306  | -2.51835 | -2.0974  | 0.0006   | 0.00701778  | yes |
| CAMK2N1  | chr1:20808883-20812728    | TTD7PVmother_uv | TTD7PV_uv | OK | 31.3075  | 12.8473   | -1.28505 | -4.81237 | 5.00E-05 | 0.000851213 | yes |
| CCDC163P | chr1:45959597-45965751    | TTD7PVmother_uv | TTD7PV_uv | OK | 0.418272 | 1.01638   | 1.28093  | 1.90905  | 0.002    | 0.0187558   | yes |
| CCDC51   | chr3:48473579-48481529    | TTD7PVmother_uv | TTD7PV_uv | OK | 13.1392  | 4.62336   | -1.50686 | -3.41031 | 5.00E-05 | 0.000851213 | yes |
| CCDC69   | chr5:150560612-150603654  | TTD7PVmother_uv | TTD7PV_uv | OK | 1.95892  | 0.772863  | -1.34177 | -2.78818 | 5.00E-05 | 0.000851213 | yes |
| CCDC8    | chr19:46913585-46916919   | TTD7PVmother_uv | TTD7PV_uv | OK | 9.42266  | 3.90014   | -1.27261 | -3.72586 | 5.00E-05 | 0.000851213 | yes |
| CCDC81   | chr11:86085777-86134151   | TTD7PVmother_uv | TTD7PV_uv | OK | 0.47344  | 0.0747061 | -2.66388 | -2.29984 | 0.0004   | 0.00504775  | yes |
| CCL2     | chr17:32582295-32584220   | TTD7PVmother_uv | TTD7PV_uv | OK | 20.1011  | 8.02054   | -1.3255  | -4.32846 | 5.00E-05 | 0.000851213 | yes |
| CCND2    | chr12:4382901-4414522     | TTD7PVmother_uv | TTD7PV_uv | OK | 0.189279 | 0.647946  | 1.77536  | 3.05309  | 0.0001   | 0.00155758  | yes |
| CCR7     | chr17:38710021-38721736   | TTD7PVmother_uv | TTD7PV_uv | OK | 1.95577  | 0.193704  | -3.33581 | -5.07498 | 5.00E-05 | 0.000851213 | yes |
| CCRL1    | chr3:132276981-132593050  | TTD7PVmother_uv | TTD7PV_uv | OK | 39.2396  | 14.063    | -1.4804  | -2.16501 | 0.0069   | 0.0491601   | yes |
| CD36     | chr7:80231503-80308593    | TTD7PVmother_uv | TTD7PV_uv | OK | 6.4965   | 1.27459   | -2.34963 | -4.34436 | 5.00E-05 | 0.000851213 | yes |
| CD82     | chr11:44587140-44641315   | TTD7PVmother_uv | TTD7PV_uv | OK | 4.76367  | 1.65828   | -1.52239 | -2.96277 | 5.00E-05 | 0.000851213 | yes |
| CDA      | chr1:20915443-20945400    | TTD7PVmother_uv | TTD7PV_uv | OK | 11.5514  | 3.49908   | -1.72302 | -4.68243 | 5.00E-05 | 0.000851213 | yes |
| CDC45    | chr22:19467413-19508135   | TTD7PVmother_uv | TTD7PV_uv | OK | 2.60979  | 5.71266   | 1.13023  | 2.44263  | 5.00E-05 | 0.000851213 | yes |
| CDCA7    | chr2:174219560-174233718  | TTD7PVmother_uv | TTD7PV_uv | OK | 0.322665 | 1.26422   | 1.97014  | 3.07035  | 5.00E-05 | 0.000851213 | yes |
| CDH10    | chr5:24487208-24645085    | TTD7PVmother_uv | TTD7PV_uv | OK | 2.75897  | 5.81512   | 1.07568  | 3.03697  | 5.00E-05 | 0.000851213 | yes |
| CDH18    | chr5:19473154-19988353    | TTD7PVmother_uv | TTD7PV_uv | OK | 1.15847  | 7.9904    | 2.78604  | 6.11496  | 5.00E-05 | 0.000851213 | yes |
| CDH6     | chr5:31193761-31329253    | TTD7PVmother_uv | TTD7PV_uv | OK | 0.610486 | 1.8607    | 1.60781  | 3.95019  | 5.00E-05 | 0.000851213 | yes |
| CDK15    | chr2:202671151-202760273  | TTD7PVmother_uv | TTD7PV_uv | OK | 0.652579 | 2.40982   | 1.8847   | 3.43509  | 5.00E-05 | 0.000851213 | yes |
| CEBPA    | chr19:33790839-33793430   | TTD7PVmother_uv | TTD7PV_uv | OK | 0.54887  | 1.29541   | 1.23887  | 2.36465  | 0.0009   | 0.0098346   | yes |

|         |                           |                 |           |    |          |           |          |          |          |             |     |
|---------|---------------------------|-----------------|-----------|----|----------|-----------|----------|----------|----------|-------------|-----|
| CECR1   | chr22:17660191-17690779   | TTD7PVmother_uv | TTD7PV_uv | OK | 2.51547  | 5.09055   | 1.01699  | 2.57725  | 0.00015  | 0.00220839  | yes |
| CECR7   | chr22:17517459-17539682   | TTD7PVmother_uv | TTD7PV_uv | OK | 0.603564 | 2.07741   | 1.78321  | 3.5612   | 5.00E-05 | 0.000851213 | yes |
| CERS4   | chr19:8274216-8327304     | TTD7PVmother_uv | TTD7PV_uv | OK | 2.62729  | 0.797558  | -1.71992 | -3.48764 | 5.00E-05 | 0.000851213 | yes |
| CFI     | chr4:110661847-110723335  | TTD7PVmother_uv | TTD7PV_uv | OK | 0.425965 | 1.28953   | 1.59803  | 2.67166  | 0.0005   | 0.00606142  | yes |
| CHDH    | chr3:53850323-53880420    | TTD7PVmother_uv | TTD7PV_uv | OK | 0.64081  | 0.302604  | -1.08247 | -1.79709 | 0.00535  | 0.0408099   | yes |
| CILP2   | chr19:19649073-19657468   | TTD7PVmother_uv | TTD7PV_uv | OK | 1.13548  | 0.426559  | -1.41249 | -2.7055  | 5.00E-05 | 0.000851213 | yes |
| CITED4  | chr1:41326727-41328018    | TTD7PVmother_uv | TTD7PV_uv | OK | 1.259    | 0.478578  | -1.39545 | -2.54578 | 0.00515  | 0.039571    | yes |
| CLCA2   | chr1:86889768-86922240    | TTD7PVmother_uv | TTD7PV_uv | OK | 0.628613 | 0.149712  | -2.06998 | -3.15735 | 5.00E-05 | 0.000851213 | yes |
| CLCN4   | chrX:10124984-10205699    | TTD7PVmother_uv | TTD7PV_uv | OK | 0.516231 | 0.124071  | -2.05685 | -3.35207 | 5.00E-05 | 0.000851213 | yes |
| CLDN23  | chr8:8559665-8561617      | TTD7PVmother_uv | TTD7PV_uv | OK | 2.57976  | 0.599452  | -2.10552 | -4.11522 | 5.00E-05 | 0.000851213 | yes |
| CLDN4   | chr7:73245192-73247015    | TTD7PVmother_uv | TTD7PV_uv | OK | 7.46516  | 1.49358   | -2.3214  | -5.59446 | 5.00E-05 | 0.000851213 | yes |
| CLEC3B  | chr3:45067758-45077563    | TTD7PVmother_uv | TTD7PV_uv | OK | 38.8821  | 11.8468   | -1.71461 | -5.9839  | 5.00E-05 | 0.000851213 | yes |
| CLGN    | chr4:141309606-141348815  | TTD7PVmother_uv | TTD7PV_uv | OK | 2.45761  | 14.0738   | 2.51768  | 6.24175  | 5.00E-05 | 0.000851213 | yes |
| CLIC3   | chr9:139889059-139891024  | TTD7PVmother_uv | TTD7PV_uv | OK | 36.7086  | 9.34935   | -1.97318 | -7.27308 | 5.00E-05 | 0.000851213 | yes |
| CLU     | chr8:27454433-27472328    | TTD7PVmother_uv | TTD7PV_uv | OK | 353.501  | 132.755   | -1.41295 | -3.52827 | 5.00E-05 | 0.000851213 | yes |
| CMAHP   | chr6:25081294-25138620    | TTD7PVmother_uv | TTD7PV_uv | OK | 2.80616  | 1.36497   | -1.03972 | -1.87715 | 0.00095  | 0.0102305   | yes |
| CNN1    | chr19:11649578-11661138   | TTD7PVmother_uv | TTD7PV_uv | OK | 34.8753  | 14.2162   | -1.29467 | -3.92339 | 5.00E-05 | 0.000851213 | yes |
| COL11A1 | chr1:103342022-103574052  | TTD7PVmother_uv | TTD7PV_uv | OK | 13.6891  | 0.771017  | -4.15012 | -7.40743 | 5.00E-05 | 0.000851213 | yes |
| COL14A1 | chr8:121137346-121384273  | TTD7PVmother_uv | TTD7PV_uv | OK | 3.34017  | 10.685    | 1.67759  | 4.9206   | 5.00E-05 | 0.000851213 | yes |
| COL4A1  | chr13:110801309-110959496 | TTD7PVmother_uv | TTD7PV_uv | OK | 35.093   | 4.10117   | -3.09707 | -7.53382 | 5.00E-05 | 0.000851213 | yes |
| COL4A2  | chr13:110959630-111165373 | TTD7PVmother_uv | TTD7PV_uv | OK | 69.8745  | 11.5617   | -2.59541 | -5.97491 | 5.00E-05 | 0.000851213 | yes |
| COL7A1  | chr3:48601505-48632593    | TTD7PVmother_uv | TTD7PV_uv | OK | 2.96446  | 1.05577   | -1.48947 | -3.79825 | 5.00E-05 | 0.000851213 | yes |
| COMP    | chr19:18893582-18902114   | TTD7PVmother_uv | TTD7PV_uv | OK | 151.554  | 66.5524   | -1.18727 | -2.98076 | 5.00E-05 | 0.000851213 | yes |
| CPB1    | chr3:148545587-148577972  | TTD7PVmother_uv | TTD7PV_uv | OK | 0.152212 | 1.9645    | 3.69001  | 4.68187  | 0.0001   | 0.00155758  | yes |
| CPM     | chr12:69244955-69357020   | TTD7PVmother_uv | TTD7PV_uv | OK | 1.67946  | 0.746554  | -1.16968 | -2.78176 | 5.00E-05 | 0.000851213 | yes |
| CPN2    | chr3:194060493-194072057  | TTD7PVmother_uv | TTD7PV_uv | OK | 0.711133 | 0.0716136 | -3.31181 | -4.04018 | 0.00025  | 0.00340302  | yes |
| CPXM2   | chr10:125505151-125651500 | TTD7PVmother_uv | TTD7PV_uv | OK | 5.28662  | 0.970306  | -2.44583 | -5.42937 | 5.00E-05 | 0.000851213 | yes |
| CRABP2  | chr1:156669399-156675608  | TTD7PVmother_uv | TTD7PV_uv | OK | 76.2804  | 306.54    | 2.00669  | 5.69589  | 5.00E-05 | 0.000851213 | yes |
| CRIP2   | chr14:105939274-105946507 | TTD7PVmother_uv | TTD7PV_uv | OK | 31.6888  | 15.6624   | -1.01667 | -2.77067 | 5.00E-05 | 0.000851213 | yes |
| CRLF1   | chr19:18704034-18717660   | TTD7PVmother_uv | TTD7PV_uv | OK | 101.763  | 9.98594   | -3.34916 | -9.47806 | 5.00E-05 | 0.000851213 | yes |
| CRYAB   | chr11:111779349-111782473 | TTD7PVmother_uv | TTD7PV_uv | OK | 329.257  | 110.884   | -1.57016 | -8.18877 | 5.00E-05 | 0.000851213 | yes |
| CRYZ    | chr1:75171171-75232360    | TTD7PVmother_uv | TTD7PV_uv | OK | 12.0274  | 4.23351   | -1.5064  | -3.14172 | 0.0001   | 0.00155758  | yes |
| CSRP2   | chr12:77252495-77272799   | TTD7PVmother_uv | TTD7PV_uv | OK | 42.6202  | 13.5618   | -1.65199 | -5.56813 | 5.00E-05 | 0.000851213 | yes |
| CTGF    | chr6:132269316-132272518  | TTD7PVmother_uv | TTD7PV_uv | OK | 2221.44  | 784.702   | -1.50128 | -2.79894 | 0.00015  | 0.00220839  | yes |
| CTH     | chr1:70876900-70905534    | TTD7PVmother_uv | TTD7PV_uv | OK | 4.1952   | 9.2477    | 1.14035  | 2.88615  | 5.00E-05 | 0.000851213 | yes |
| CTSC    | chr11:88026759-88070941   | TTD7PVmother_uv | TTD7PV_uv | OK | 7.53148  | 16.3605   | 1.11921  | 3.07061  | 5.00E-05 | 0.000851213 | yes |
| CTXN1   | chr19:7989380-7991051     | TTD7PVmother_uv | TTD7PV_uv | OK | 9.07852  | 4.36505   | -1.05646 | -3.15838 | 0.00015  | 0.00220839  | yes |

|          |                           |                 |           |    |          |           |          |           |          |             |     |
|----------|---------------------------|-----------------|-----------|----|----------|-----------|----------|-----------|----------|-------------|-----|
| CYGB     | chr17:74523429-74541458   | TTD7PVmother_uv | TTD7PV_uv | OK | 22.3545  | 10.9889   | -1.02452 | -3.33804  | 5.00E-05 | 0.000851213 | yes |
| CYP26B1  | chr2:72356366-72374963    | TTD7PVmother_uv | TTD7PV_uv | OK | 1.45939  | 5.70478   | 1.96681  | 5.30041   | 5.00E-05 | 0.000851213 | yes |
| CYP2E1   | chr10:135340866-135352620 | TTD7PVmother_uv | TTD7PV_uv | OK | 1.99831  | 0.492406  | -2.02086 | -3.57481  | 5.00E-05 | 0.000851213 | yes |
| CYR61    | chr1:86046443-86049648    | TTD7PVmother_uv | TTD7PV_uv | OK | 1191.26  | 503.406   | -1.24269 | -2.79485  | 5.00E-05 | 0.000851213 | yes |
| CYTL1    | chr4:5016313-5021197      | TTD7PVmother_uv | TTD7PV_uv | OK | 1.58715  | 5.58828   | 1.81596  | 3.9493    | 5.00E-05 | 0.000851213 | yes |
| DAAM2    | chr6:39760158-39902290    | TTD7PVmother_uv | TTD7PV_uv | OK | 7.64455  | 3.29494   | -1.21418 | -3.20678  | 5.00E-05 | 0.000851213 | yes |
| DAPK1    | chr9:90112755-90323549    | TTD7PVmother_uv | TTD7PV_uv | OK | 4.26601  | 0.507445  | -3.07156 | -7.03886  | 5.00E-05 | 0.000851213 | yes |
| DBC1     | chr9:121928907-122131739  | TTD7PVmother_uv | TTD7PV_uv | OK | 3.92379  | 0.536652  | -2.87019 | -5.90432  | 5.00E-05 | 0.000851213 | yes |
| DBNDD1   | chr16:90071278-90085937   | TTD7PVmother_uv | TTD7PV_uv | OK | 0.885986 | 0.217358  | -2.02721 | -2.37895  | 0.00035  | 0.00451604  | yes |
| DCAF4    | chr14:73393039-73426357   | TTD7PVmother_uv | TTD7PV_uv | OK | 11.0234  | 4.37678   | -1.33263 | -3.58694  | 5.00E-05 | 0.000851213 | yes |
| DDIT4L   | chr4:101107026-101111655  | TTD7PVmother_uv | TTD7PV_uv | OK | 3.33838  | 1.24005   | -1.42874 | -3.47854  | 5.00E-05 | 0.000851213 | yes |
| DENND3   | chr8:142138719-142205900  | TTD7PVmother_uv | TTD7PV_uv | OK | 3.20239  | 0.789983  | -2.01926 | -4.7263   | 5.00E-05 | 0.000851213 | yes |
| DGAT2    | chr11:75479777-75512581   | TTD7PVmother_uv | TTD7PV_uv | OK | 1.28687  | 0.572022  | -1.16973 | -1.90863  | 0.00145  | 0.0144679   | yes |
| DISC1    | chr1:231664398-232177019  | TTD7PVmother_uv | TTD7PV_uv | OK | 0.48342  | 0.118353  | -2.03018 | -0.891516 | 0.00015  | 0.00220839  | yes |
| DISP2    | chr15:40650433-40663256   | TTD7PVmother_uv | TTD7PV_uv | OK | 2.89569  | 1.16145   | -1.31798 | -3.31788  | 5.00E-05 | 0.000851213 | yes |
| DLX1     | chr2:172950207-172954401  | TTD7PVmother_uv | TTD7PV_uv | OK | 2.618    | 0.565509  | -2.21084 | -3.93036  | 5.00E-05 | 0.000851213 | yes |
| DLX2     | chr2:172964165-172967478  | TTD7PVmother_uv | TTD7PV_uv | OK | 29.3039  | 13.38     | -1.13102 | -4.19179  | 5.00E-05 | 0.000851213 | yes |
| DLX3     | chr17:48067368-48072588   | TTD7PVmother_uv | TTD7PV_uv | OK | 1.81943  | 0.840615  | -1.11397 | -2.2338   | 0.0009   | 0.0098346   | yes |
| DNAJC12  | chr10:69556426-69597937   | TTD7PVmother_uv | TTD7PV_uv | OK | 0.357236 | 1.10822   | 1.6333   | 1.73644   | 0.0041   | 0.0331146   | yes |
| DOCK4    | chr7:111366163-111846462  | TTD7PVmother_uv | TTD7PV_uv | OK | 0.834614 | 0.202239  | -2.04505 | -3.96038  | 5.00E-05 | 0.000851213 | yes |
| DPP4     | chr2:162848754-162931052  | TTD7PVmother_uv | TTD7PV_uv | OK | 155.569  | 20.9893   | -2.88983 | -8.37999  | 5.00E-05 | 0.000851213 | yes |
| DPYSL4   | chr10:134000413-134019280 | TTD7PVmother_uv | TTD7PV_uv | OK | 1.11377  | 3.30189   | 1.56784  | 3.51606   | 5.00E-05 | 0.000851213 | yes |
| DSG2     | chr18:29078026-29136874   | TTD7PVmother_uv | TTD7PV_uv | OK | 0.586341 | 0.122895  | -2.25431 | -3.17428  | 5.00E-05 | 0.000851213 | yes |
| DSP      | chr6:7541869-7586946      | TTD7PVmother_uv | TTD7PV_uv | OK | 28.067   | 8.63457   | -1.70068 | -4.83162  | 5.00E-05 | 0.000851213 | yes |
| DUSP1    | chr5:172195092-172198203  | TTD7PVmother_uv | TTD7PV_uv | OK | 299.98   | 137.07    | -1.12995 | -3.66357  | 5.00E-05 | 0.000851213 | yes |
| DUSP10   | chr1:221874763-221915516  | TTD7PVmother_uv | TTD7PV_uv | OK | 3.15228  | 1.07639   | -1.55019 | -3.1148   | 5.00E-05 | 0.000851213 | yes |
| DUSP4    | chr8:29190578-29208267    | TTD7PVmother_uv | TTD7PV_uv | OK | 4.23593  | 0.265627  | -3.99521 | -7.99456  | 5.00E-05 | 0.000851213 | yes |
| DYNC111  | chr7:95401817-95727736    | TTD7PVmother_uv | TTD7PV_uv | OK | 0.905777 | 0.0898745 | -3.33317 | -3.43017  | 5.00E-05 | 0.000851213 | yes |
| DYSF     | chr2:71680752-71913893    | TTD7PVmother_uv | TTD7PV_uv | OK | 0.502805 | 0.107157  | -2.23027 | -2.69658  | 5.00E-05 | 0.000851213 | yes |
| EBF3     | chr10:131633495-131762091 | TTD7PVmother_uv | TTD7PV_uv | OK | 3.5183   | 1.01832   | -1.78869 | -4.23925  | 5.00E-05 | 0.000851213 | yes |
| EDIL3    | chr5:83238125-83680611    | TTD7PVmother_uv | TTD7PV_uv | OK | 37.6773  | 6.87158   | -2.45498 | -6.22459  | 5.00E-05 | 0.000851213 | yes |
| EDN1     | chr6:12290528-12297427    | TTD7PVmother_uv | TTD7PV_uv | OK | 4.75227  | 2.32344   | -1.03235 | -2.25732  | 0.00015  | 0.00220839  | yes |
| EEPD1    | chr7:36192835-36341152    | TTD7PVmother_uv | TTD7PV_uv | OK | 2.24412  | 0.750537  | -1.58015 | -3.50226  | 5.00E-05 | 0.000851213 | yes |
| EFCAB4B  | chr12:3724493-3862366     | TTD7PVmother_uv | TTD7PV_uv | OK | 1.24894  | 0.201883  | -2.62912 | -3.08505  | 5.00E-05 | 0.000851213 | yes |
| EGR4     | chr2:73518056-73520829    | TTD7PVmother_uv | TTD7PV_uv | OK | 4.53891  | 2.16875   | -1.06548 | -2.85089  | 0.0001   | 0.00155758  | yes |
| EIF4EBP1 | chr8:37888019-37917883    | TTD7PVmother_uv | TTD7PV_uv | OK | 61.1918  | 128.331   | 1.06846  | 4.7423    | 5.00E-05 | 0.000851213 | yes |
| ELFN2    | chr22:37763999-37823505   | TTD7PVmother_uv | TTD7PV_uv | OK | 0.223883 | 0.548779  | 1.29348  | 2.41677   | 0.00015  | 0.00220839  | yes |



|          |                           |                 |           |    |           |           |          |          |          |             |     |
|----------|---------------------------|-----------------|-----------|----|-----------|-----------|----------|----------|----------|-------------|-----|
| ELN      | chr7:73442426-73484236    | TTD7PVmother_uv | TTD7PV_uv | OK | 361.179   | 903.054   | 1.48403  | 2.40938  | 5.00E-05 | 0.000851213 | yes |
| ELOVL2   | chr6:10980992-11079377    | TTD7PVmother_uv | TTD7PV_uv | OK | 0.310434  | 0.663888  | 1.09665  | 1.93061  | 0.00285  | 0.0248971   | yes |
| ENPP5    | chr6:46127761-46138717    | TTD7PVmother_uv | TTD7PV_uv | OK | 2.87854   | 1.11048   | -1.37416 | -3.03427 | 5.00E-05 | 0.000851213 | yes |
| EPDR1    | chr7:37960162-37991542    | TTD7PVmother_uv | TTD7PV_uv | OK | 21.3604   | 1.45972   | -3.87117 | -9.03993 | 5.00E-05 | 0.000851213 | yes |
| EPHA3    | chr3:89156673-89531284    | TTD7PVmother_uv | TTD7PV_uv | OK | 0.0705308 | 0.527846  | 2.90379  | 3.19486  | 5.00E-05 | 0.000851213 | yes |
| ESM1     | chr5:54273694-54281414    | TTD7PVmother_uv | TTD7PV_uv | OK | 0.927307  | 1.9767    | 1.09197  | 1.93243  | 0.00155  | 0.015237    | yes |
| ESYT3    | chr3:138153414-138197256  | TTD7PVmother_uv | TTD7PV_uv | OK | 0.705852  | 0.109603  | -2.68708 | -3.92469 | 5.00E-05 | 0.000851213 | yes |
| ETNK2    | chr1:204100189-204121307  | TTD7PVmother_uv | TTD7PV_uv | OK | 1.6026    | 0.698653  | -1.19776 | -2.35249 | 0.00035  | 0.00451604  | yes |
| EXO1     | chr1:242011492-242053241  | TTD7PVmother_uv | TTD7PV_uv | OK | 0.54519   | 1.40296   | 1.36365  | 2.40476  | 5.00E-05 | 0.000851213 | yes |
| EXTL1    | chr1:26348270-26362954    | TTD7PVmother_uv | TTD7PV_uv | OK | 0.783477  | 0.0995945 | -2.97575 | -3.8986  | 5.00E-05 | 0.000851213 | yes |
| F10      | chr13:113777112-113803843 | TTD7PVmother_uv | TTD7PV_uv | OK | 4.62466   | 1.01938   | -2.18166 | -4.50543 | 5.00E-05 | 0.000851213 | yes |
| F2R      | chr5:76011867-76031595    | TTD7PVmother_uv | TTD7PV_uv | OK | 7.57075   | 17.5776   | 1.21523  | 4.29811  | 5.00E-05 | 0.000851213 | yes |
| F3       | chr1:94994731-95007413    | TTD7PVmother_uv | TTD7PV_uv | OK | 73.7999   | 12.7506   | -2.53305 | -7.36274 | 5.00E-05 | 0.000851213 | yes |
| F8       | chrX:154064063-154250998  | TTD7PVmother_uv | TTD7PV_uv | OK | 3.58974   | 1.20696   | -1.5725  | -2.5071  | 0.0017   | 0.0164429   | yes |
| FABP3    | chr1:31838099-31845923    | TTD7PVmother_uv | TTD7PV_uv | OK | 15.6152   | 5.51648   | -1.50113 | -4.38822 | 5.00E-05 | 0.000851213 | yes |
| FABP5    | chr8:82192717-82197012    | TTD7PVmother_uv | TTD7PV_uv | OK | 4.7277    | 16.9883   | 1.84533  | 5.53852  | 5.00E-05 | 0.000851213 | yes |
| FAM118A  | chr22:45705080-45737836   | TTD7PVmother_uv | TTD7PV_uv | OK | 2.96788   | 6.60695   | 1.15455  | 2.92201  | 5.00E-05 | 0.000851213 | yes |
| FAM134B  | chr5:16473146-16617167    | TTD7PVmother_uv | TTD7PV_uv | OK | 2.0514    | 0.242336  | -3.08153 | -5.02597 | 5.00E-05 | 0.000851213 | yes |
| FAM155A  | chr13:107820878-108519460 | TTD7PVmother_uv | TTD7PV_uv | OK | 2.66284   | 0.715851  | -1.89524 | -4.27    | 5.00E-05 | 0.000851213 | yes |
| FAM171A2 | chr17:42431100-42441235   | TTD7PVmother_uv | TTD7PV_uv | OK | 4.47822   | 1.98455   | -1.17411 | -3.08802 | 5.00E-05 | 0.000851213 | yes |
| FAM21C   | chr10:46222647-46288412   | TTD7PVmother_uv | TTD7PV_uv | OK | 8.3612    | 3.78776   | -1.14236 | -3.18864 | 5.00E-05 | 0.000851213 | yes |
| FAM43A   | chr3:194406621-194409766  | TTD7PVmother_uv | TTD7PV_uv | OK | 45.6099   | 20.2561   | -1.17099 | -4.36266 | 5.00E-05 | 0.000851213 | yes |
| FAM43B   | chr1:20878931-20881513    | TTD7PVmother_uv | TTD7PV_uv | OK | 0.77044   | 0.0960717 | -3.0035  | -3.80577 | 0.0001   | 0.00155758  | yes |
| FAM65C   | chr20:49202646-49253426   | TTD7PVmother_uv | TTD7PV_uv | OK | 0.878175  | 0.326041  | -1.42945 | -2.42401 | 0.00015  | 0.00220839  | yes |
| FAM83H   | chr8:144806102-144815914  | TTD7PVmother_uv | TTD7PV_uv | OK | 4.52967   | 1.99977   | -1.17957 | -3.30103 | 5.00E-05 | 0.000851213 | yes |
| FAM89A   | chr1:231154703-231175995  | TTD7PVmother_uv | TTD7PV_uv | OK | 3.82567   | 1.63494   | -1.22647 | -2.38045 | 0.0003   | 0.00396402  | yes |
| FBN2     | chr5:127593600-127873735  | TTD7PVmother_uv | TTD7PV_uv | OK | 4.48316   | 33.5592   | 2.90412  | 8.3824   | 5.00E-05 | 0.000851213 | yes |
| FBXL2    | chr3:33318933-33428757    | TTD7PVmother_uv | TTD7PV_uv | OK | 1.22338   | 0.251566  | -2.28187 | -3.5305  | 5.00E-05 | 0.000851213 | yes |
| FBXO32   | chr8:124510126-124553493  | TTD7PVmother_uv | TTD7PV_uv | OK | 5.04107   | 1.11133   | -2.18144 | -5.70106 | 5.00E-05 | 0.000851213 | yes |
| FBXO41   | chr2:73481809-73496758    | TTD7PVmother_uv | TTD7PV_uv | OK | 0.819619  | 0.185183  | -2.146   | -3.93932 | 5.00E-05 | 0.000851213 | yes |
| FGD4     | chr12:32655040-32798984   | TTD7PVmother_uv | TTD7PV_uv | OK | 0.519617  | 0.217657  | -1.25539 | -2.43457 | 0.0003   | 0.00396402  | yes |
| FGF1     | chr5:141971742-142077635  | TTD7PVmother_uv | TTD7PV_uv | OK | 4.15068   | 1.73872   | -1.25532 | -3.01253 | 5.00E-05 | 0.000851213 | yes |
| FGF18    | chr5:170846666-170884630  | TTD7PVmother_uv | TTD7PV_uv | OK | 0.3578    | 0.919458  | 1.36163  | 2.19361  | 0.002    | 0.0187558   | yes |
| FGF7     | chr15:49447975-49913118   | TTD7PVmother_uv | TTD7PV_uv | OK | 70.8275   | 31.4761   | -1.17005 | -3.60093 | 5.00E-05 | 0.000851213 | yes |
| FGFR3    | chr4:1795038-1810599      | TTD7PVmother_uv | TTD7PV_uv | OK | 0.556168  | 1.23435   | 1.15016  | 2.18517  | 0.00065  | 0.00748478  | yes |
| FGL2     | chr7:76751933-76924521    | TTD7PVmother_uv | TTD7PV_uv | OK | 2.93327   | 10.4911   | 1.83859  | 4.94408  | 5.00E-05 | 0.000851213 | yes |
| FIBCD1   | chr9:133777824-133814455  | TTD7PVmother_uv | TTD7PV_uv | OK | 1.59176   | 0.499534  | -1.67197 | -2.96406 | 5.00E-05 | 0.000851213 | yes |

|          |                           |                 |           |    |          |           |          |          |          |             |     |
|----------|---------------------------|-----------------|-----------|----|----------|-----------|----------|----------|----------|-------------|-----|
| FKBP1B   | chr2:24272583-24286550    | TTD7PVmother_uv | TTD7PV_uv | OK | 4.08427  | 1.85044   | -1.14221 | -1.85794 | 0.0023   | 0.0211453   | yes |
| FKBP9L   | chr7:55748766-55772260    | TTD7PVmother_uv | TTD7PV_uv | OK | 7.9708   | 3.07857   | -1.37247 | -3.4214  | 5.00E-05 | 0.000851213 | yes |
| FLG      | chr1:152274650-152297679  | TTD7PVmother_uv | TTD7PV_uv | OK | 0.706129 | 0.101296  | -2.80135 | -4.22871 | 5.00E-05 | 0.000851213 | yes |
| FLJ34208 | chr3:194207868-194209274  | TTD7PVmother_uv | TTD7PV_uv | OK | 3.88307  | 1.11264   | -1.80322 | -3.87153 | 5.00E-05 | 0.000851213 | yes |
| FMNL1    | chr17:43299291-43324683   | TTD7PVmother_uv | TTD7PV_uv | OK | 1.21687  | 0.531924  | -1.19389 | -2.33658 | 0.0003   | 0.00396402  | yes |
| FNDC1    | chr6:159590428-159693140  | TTD7PVmother_uv | TTD7PV_uv | OK | 19.2127  | 8.5533    | -1.16751 | -3.08369 | 5.00E-05 | 0.000851213 | yes |
| FNDC4    | chr2:27714749-27718126    | TTD7PVmother_uv | TTD7PV_uv | OK | 15.6906  | 7.55013   | -1.05533 | -3.35857 | 5.00E-05 | 0.000851213 | yes |
| FNIP2    | chr4:159690181-159956333  | TTD7PVmother_uv | TTD7PV_uv | OK | 4.38956  | 1.83131   | -1.2612  | -3.41107 | 5.00E-05 | 0.000851213 | yes |
| FOLR3    | chr11:71846770-71850934   | TTD7PVmother_uv | TTD7PV_uv | OK | 10.1881  | 3.4446    | -1.56448 | -4.14981 | 0.0001   | 0.00155758  | yes |
| FOXL2    | chr3:138663065-138665982  | TTD7PVmother_uv | TTD7PV_uv | OK | 1.6897   | 0.304775  | -2.47095 | -4.59987 | 5.00E-05 | 0.000851213 | yes |
| FOXO1    | chr13:41129800-41240734   | TTD7PVmother_uv | TTD7PV_uv | OK | 1.44821  | 0.567362  | -1.35193 | -3.15    | 5.00E-05 | 0.000851213 | yes |
| FOXO3    | chr6:108881025-109005971  | TTD7PVmother_uv | TTD7PV_uv | OK | 10.1174  | 4.28471   | -1.23957 | -4.01143 | 5.00E-05 | 0.000851213 | yes |
| FRG1B    | chr20:29611878-29634007   | TTD7PVmother_uv | TTD7PV_uv | OK | 3.29951  | 9.00716   | 1.44882  | 3.75111  | 5.00E-05 | 0.000851213 | yes |
| FRY      | chr13:32605436-32870776   | TTD7PVmother_uv | TTD7PV_uv | OK | 0.906243 | 0.372728  | -1.28177 | -2.87727 | 5.00E-05 | 0.000851213 | yes |
| FSCN2    | chr17:79495416-79504156   | TTD7PVmother_uv | TTD7PV_uv | OK | 0.807629 | 0.230533  | -1.80872 | -2.19901 | 0.0011   | 0.0115122   | yes |
| GABBR2   | chr9:101050363-101471479  | TTD7PVmother_uv | TTD7PV_uv | OK | 2.05841  | 0.61592   | -1.74071 | -3.83225 | 5.00E-05 | 0.000851213 | yes |
| GAD1     | chr2:171673199-171717659  | TTD7PVmother_uv | TTD7PV_uv | OK | 0.682937 | 0.141455  | -2.27141 | -2.02113 | 0.00115  | 0.0119464   | yes |
| GADD45A  | chr1:68150859-68154021    | TTD7PVmother_uv | TTD7PV_uv | OK | 315.083  | 151.731   | -1.05421 | -3.0445  | 5.00E-05 | 0.000851213 | yes |
| GADD45B  | chr19:2476122-2478257     | TTD7PVmother_uv | TTD7PV_uv | OK | 330.946  | 141.179   | -1.22907 | -4.3376  | 5.00E-05 | 0.000851213 | yes |
| GALNT14  | chr2:31133330-31361592    | TTD7PVmother_uv | TTD7PV_uv | OK | 0.316517 | 2.67425   | 3.07878  | 4.59755  | 5.00E-05 | 0.000851213 | yes |
| GALNT15  | chr3:16216183-16271253    | TTD7PVmother_uv | TTD7PV_uv | OK | 13.0751  | 4.44932   | -1.55516 | -4.93912 | 5.00E-05 | 0.000851213 | yes |
| GALNT5   | chr2:158114339-158167913  | TTD7PVmother_uv | TTD7PV_uv | OK | 28.9241  | 74.8109   | 1.37098  | 3.94572  | 5.00E-05 | 0.000851213 | yes |
| GALNT6   | chr12:51745832-51909547   | TTD7PVmother_uv | TTD7PV_uv | OK | 3.16882  | 1.30974   | -1.27467 | -2.24274 | 0.0008   | 0.00892721  | yes |
| GAS1     | chr9:89559276-89562104    | TTD7PVmother_uv | TTD7PV_uv | OK | 29.1588  | 12.5159   | -1.22016 | -4.77474 | 5.00E-05 | 0.000851213 | yes |
| GAS5     | chr1:173832385-173837125  | TTD7PVmother_uv | TTD7PV_uv | OK | 152.77   | 321.699   | 1.07435  | 3.35364  | 5.00E-05 | 0.000851213 | yes |
| GAS6     | chr13:114518582-114567046 | TTD7PVmother_uv | TTD7PV_uv | OK | 796.842  | 266.734   | -1.57889 | -3.44568 | 5.00E-05 | 0.000851213 | yes |
| GCNT4    | chr5:74323288-74326724    | TTD7PVmother_uv | TTD7PV_uv | OK | 0.701886 | 0.241203  | -1.54099 | -2.6322  | 0.0005   | 0.00606142  | yes |
| GDF15    | chr19:18496967-18499986   | TTD7PVmother_uv | TTD7PV_uv | OK | 108.364  | 33.876    | -1.67755 | -5.41942 | 5.00E-05 | 0.000851213 | yes |
| GDF5     | chr20:34021148-34026027   | TTD7PVmother_uv | TTD7PV_uv | OK | 8.85856  | 2.96091   | -1.58103 | -4.11364 | 5.00E-05 | 0.000851213 | yes |
| GDF6     | chr8:97154557-97173020    | TTD7PVmother_uv | TTD7PV_uv | OK | 6.37089  | 1.85578   | -1.77947 | -4.83551 | 5.00E-05 | 0.000851213 | yes |
| GFRA1    | chr10:117816441-118033126 | TTD7PVmother_uv | TTD7PV_uv | OK | 2.18287  | 5.7712    | 1.40265  | 4.18421  | 5.00E-05 | 0.000851213 | yes |
| GGT5     | chr22:24615621-24641110   | TTD7PVmother_uv | TTD7PV_uv | OK | 0.942453 | 0.109693  | -3.10295 | -3.35284 | 5.00E-05 | 0.000851213 | yes |
| GJA3     | chr13:20712394-20735183   | TTD7PVmother_uv | TTD7PV_uv | OK | 1.07755  | 0.253983  | -2.08496 | -4.0261  | 5.00E-05 | 0.000851213 | yes |
| GLIS1    | chr1:53971905-54199877    | TTD7PVmother_uv | TTD7PV_uv | OK | 0.823476 | 0.389402  | -1.08047 | -1.91403 | 0.00465  | 0.0367347   | yes |
| GLRX     | chr5:95149552-95158577    | TTD7PVmother_uv | TTD7PV_uv | OK | 56.8185  | 28.3715   | -1.00192 | -2.98728 | 5.00E-05 | 0.000851213 | yes |
| GNAZ     | chr22:23401592-23484241   | TTD7PVmother_uv | TTD7PV_uv | OK | 0.825883 | 0.0868321 | -3.24964 | -3.64183 | 5.00E-05 | 0.000851213 | yes |
| GNG11    | chr7:93551015-93555826    | TTD7PVmother_uv | TTD7PV_uv | OK | 80.3287  | 33.8049   | -1.24868 | -5.21009 | 5.00E-05 | 0.000851213 | yes |

|           |                          |                 |           |    |          |           |          |          |          |             |     |
|-----------|--------------------------|-----------------|-----------|----|----------|-----------|----------|----------|----------|-------------|-----|
| GPC3      | chrX:132669775-133119673 | TTD7Pvmother_uv | TTD7PV_uv | OK | 0.1378   | 0.681594  | 2.30634  | 2.40561  | 5.00E-05 | 0.000851213 | yes |
| GPR155    | chr2:175296299-175351816 | TTD7Pvmother_uv | TTD7PV_uv | OK | 0.902143 | 0.431574  | -1.06375 | -2.22675 | 0.00035  | 0.00451604  | yes |
| GPR68     | chr14:91698875-91720224  | TTD7Pvmother_uv | TTD7PV_uv | OK | 18.9166  | 5.46127   | -1.79235 | -4.92794 | 5.00E-05 | 0.000851213 | yes |
| GPRC5C    | chr17:72427666-72443568  | TTD7Pvmother_uv | TTD7PV_uv | OK | 0.530472 | 0.139265  | -1.92945 | -2.00531 | 0.00345  | 0.0290342   | yes |
| GPX3      | chr5:150399998-150408554 | TTD7Pvmother_uv | TTD7PV_uv | OK | 19.0912  | 0.998739  | -4.25665 | -9.38361 | 5.00E-05 | 0.000851213 | yes |
| GRID1     | chr10:87337487-88126250  | TTD7Pvmother_uv | TTD7PV_uv | OK | 0.690907 | 0.0941022 | -2.87619 | -4.00979 | 5.00E-05 | 0.000851213 | yes |
| GRIK2     | chr6:101846860-102517958 | TTD7Pvmother_uv | TTD7PV_uv | OK | 3.30934  | 0.128609  | -4.68548 | -7.77071 | 5.00E-05 | 0.000851213 | yes |
| GRIN3A    | chr9:104331633-104500862 | TTD7Pvmother_uv | TTD7PV_uv | OK | 0.125018 | 1.20013   | 3.26298  | 5.75303  | 5.00E-05 | 0.000851213 | yes |
| GSTM5     | chr1:110254863-110260890 | TTD7Pvmother_uv | TTD7PV_uv | OK | 0.522966 | 2.9751    | 2.50815  | 4.58856  | 5.00E-05 | 0.000851213 | yes |
| GYPC      | chr2:127413510-127454251 | TTD7Pvmother_uv | TTD7PV_uv | OK | 40.1332  | 17.0907   | -1.23158 | -3.54874 | 5.00E-05 | 0.000851213 | yes |
| H19       | chr11:2016405-2019065    | TTD7Pvmother_uv | TTD7PV_uv | OK | 0.983669 | 8.77793   | 3.15764  | 5.76574  | 5.00E-05 | 0.000851213 | yes |
| HAND2     | chr4:174447651-174451378 | TTD7Pvmother_uv | TTD7PV_uv | OK | 10.8015  | 1.40063   | -2.94709 | -7.51888 | 5.00E-05 | 0.000851213 | yes |
| HAPLN1    | chr5:82934016-83016896   | TTD7Pvmother_uv | TTD7PV_uv | OK | 19.8811  | 1.21602   | -4.03116 | -8.36971 | 5.00E-05 | 0.000851213 | yes |
| HAPLN3    | chr15:89420518-89438770  | TTD7Pvmother_uv | TTD7PV_uv | OK | 15.9776  | 4.60257   | -1.79554 | -5.62081 | 5.00E-05 | 0.000851213 | yes |
| HAS1      | chr19:52216364-52227221  | TTD7Pvmother_uv | TTD7PV_uv | OK | 6.2763   | 0.362512  | -4.11381 | -7.90081 | 5.00E-05 | 0.000851213 | yes |
| HGF       | chr7:81331443-81399452   | TTD7Pvmother_uv | TTD7PV_uv | OK | 0.268743 | 1.04794   | 1.96325  | 2.48318  | 0.0001   | 0.00155758  | yes |
| HIST1H1C  | chr6:26055967-26056699   | TTD7Pvmother_uv | TTD7PV_uv | OK | 49.929   | 16.2815   | -1.61664 | -6.56062 | 5.00E-05 | 0.000851213 | yes |
| HIST1H2BC | chr6:26123694-26124132   | TTD7Pvmother_uv | TTD7PV_uv | OK | 7.43871  | 2.72996   | -1.44617 | -4.83652 | 0.0034   | 0.0287283   | yes |
| HIST1H4H  | chr6:26285353-26285727   | TTD7Pvmother_uv | TTD7PV_uv | OK | 11.1581  | 4.02196   | -1.47211 | -6.43154 | 0.0047   | 0.037014    | yes |
| HIST2H2BE | chr1:149856009-149858232 | TTD7Pvmother_uv | TTD7PV_uv | OK | 24.2636  | 11.4733   | -1.08052 | -4.12501 | 5.00E-05 | 0.000851213 | yes |
| HK2       | chr2:75059781-75120481   | TTD7Pvmother_uv | TTD7PV_uv | OK | 7.92443  | 2.55738   | -1.63164 | -5.09907 | 5.00E-05 | 0.000851213 | yes |
| HMGA2     | chr12:66151799-66360071  | TTD7Pvmother_uv | TTD7PV_uv | OK | 3.25366  | 1.41614   | -1.2001  | -1.90695 | 0.0039   | 0.0319486   | yes |
| HMOX1     | chr22:35777059-35790207  | TTD7Pvmother_uv | TTD7PV_uv | OK | 199.108  | 88.0884   | -1.17653 | -4.06793 | 5.00E-05 | 0.000851213 | yes |
| HNRNPA1   | chr12:54674487-54679030  | TTD7Pvmother_uv | TTD7PV_uv | OK | 208.649  | 447.447   | 1.10064  | 2.41859  | 5.00E-05 | 0.000851213 | yes |
| HOXA1     | chr7:27132613-27135625   | TTD7Pvmother_uv | TTD7PV_uv | OK | 1.40629  | 0.560044  | -1.32828 | -2.2827  | 0.0002   | 0.00284504  | yes |
| HOXB8     | chr17:46689707-46692301  | TTD7Pvmother_uv | TTD7PV_uv | OK | 5.96961  | 0.303813  | -4.29638 | -7.69216 | 5.00E-05 | 0.000851213 | yes |
| HOXB9     | chr17:46698518-46703835  | TTD7Pvmother_uv | TTD7PV_uv | OK | 2.79624  | 0.193768  | -3.85109 | -6.33522 | 5.00E-05 | 0.000851213 | yes |
| HOXC10    | chr12:54378945-54384062  | TTD7Pvmother_uv | TTD7PV_uv | OK | 25.0667  | 0.062826  | -8.64019 | -7.98179 | 0.00265  | 0.0234417   | yes |
| HOXC9     | chr12:54393876-54397120  | TTD7Pvmother_uv | TTD7PV_uv | OK | 18.1309  | 4.94524   | -1.87434 | -5.82775 | 5.00E-05 | 0.000851213 | yes |
| HS3ST2    | chr16:22825859-22927659  | TTD7Pvmother_uv | TTD7PV_uv | OK | 0.710916 | 0.0980804 | -2.85764 | -3.08376 | 0.0016   | 0.0156192   | yes |
| HS3ST3A1  | chr17:13399005-13505244  | TTD7Pvmother_uv | TTD7PV_uv | OK | 8.80994  | 3.46703   | -1.34543 | -4.01805 | 5.00E-05 | 0.000851213 | yes |
| HSD11B1   | chr1:209859524-209908295 | TTD7Pvmother_uv | TTD7PV_uv | OK | 1.26066  | 0.347857  | -1.85761 | -2.25905 | 0.0004   | 0.00504775  | yes |
| HSD3B7    | chr16:30996518-31000473  | TTD7Pvmother_uv | TTD7PV_uv | OK | 36.5959  | 16.4404   | -1.15443 | -3.50449 | 5.00E-05 | 0.000851213 | yes |
| HSPA2     | chr14:65007185-65009954  | TTD7Pvmother_uv | TTD7PV_uv | OK | 21.3862  | 7.78784   | -1.45739 | -4.65795 | 5.00E-05 | 0.000851213 | yes |
| HSPA6     | chr1:161494035-161496687 | TTD7Pvmother_uv | TTD7PV_uv | OK | 2.54867  | 0.198041  | -3.68587 | -5.71614 | 5.00E-05 | 0.000851213 | yes |
| HSPB3     | chr5:53751430-53752214   | TTD7Pvmother_uv | TTD7PV_uv | OK | 3.83136  | 1.66153   | -1.20534 | -2.77645 | 0.0026   | 0.0231127   | yes |
| HSPB7     | chr1:16340522-16345285   | TTD7Pvmother_uv | TTD7PV_uv | OK | 320.336  | 132.04    | -1.27861 | -3.51977 | 5.00E-05 | 0.000851213 | yes |

|         |                                |                 |           |    |          |          |          |          |          |             |     |
|---------|--------------------------------|-----------------|-----------|----|----------|----------|----------|----------|----------|-------------|-----|
| HSPB8   | chr12:119616594-119632551      | TTD7PVmother_uv | TTD7PV_uv | OK | 24.728   | 9.63685  | -1.35951 | -4.70308 | 5.00E-05 | 0.000851213 | yes |
| HTR2A   | chr13:47405676-47471211        | TTD7PVmother_uv | TTD7PV_uv | OK | 0.594662 | 0.120219 | -2.30641 | -3.41002 | 0.0001   | 0.00155758  | yes |
| HTRA3   | chr4:8271488-8308838           | TTD7PVmother_uv | TTD7PV_uv | OK | 23.6443  | 62.9367  | 1.41241  | 4.81603  | 5.00E-05 | 0.000851213 | yes |
| ICAM1   | chr19:10381516-10397291        | TTD7PVmother_uv | TTD7PV_uv | OK | 6.70212  | 1.82033  | -1.88042 | -4.9088  | 5.00E-05 | 0.000851213 | yes |
| ICAM5   | chr19:10400654-10407454        | TTD7PVmother_uv | TTD7PV_uv | OK | 1.29031  | 0.271506 | -2.24866 | -3.76918 | 5.00E-05 | 0.000851213 | yes |
| IDO1    | chr8:39771327-39786309         | TTD7PVmother_uv | TTD7PV_uv | OK | 0.830596 | 1.66144  | 1.00022  | 1.89224  | 0.00505  | 0.0390401   | yes |
| IER3    | chr6_ssto_hap7:2043292-2044644 | TTD7PVmother_uv | TTD7PV_uv | OK | 945.916  | 336.744  | -1.49006 | -4.63658 | 5.00E-05 | 0.000851213 | yes |
| IFFO2   | chr1:19230773-19282826         | TTD7PVmother_uv | TTD7PV_uv | OK | 1.64144  | 0.688058 | -1.25436 | -2.8723  | 5.00E-05 | 0.000851213 | yes |
| IFI44   | chr1:79115476-79129763         | TTD7PVmother_uv | TTD7PV_uv | OK | 1.70821  | 3.84761  | 1.17148  | 2.6983   | 0.00025  | 0.00340302  | yes |
| IFIT1   | chr10:91152302-91166244        | TTD7PVmother_uv | TTD7PV_uv | OK | 4.58418  | 1.68563  | -1.44338 | -3.53508 | 5.00E-05 | 0.000851213 | yes |
| IFIT2   | chr10:91061705-91069033        | TTD7PVmother_uv | TTD7PV_uv | OK | 2.30611  | 0.911571 | -1.33904 | -2.91349 | 5.00E-05 | 0.000851213 | yes |
| IGDCC4  | chr15:65673824-65715410        | TTD7PVmother_uv | TTD7PV_uv | OK | 0.425185 | 2.83894  | 2.73919  | 6.1165   | 5.00E-05 | 0.000851213 | yes |
| IGF2BP1 | chr17:47074773-47133507        | TTD7PVmother_uv | TTD7PV_uv | OK | 0.277209 | 0.616349 | 1.15277  | 2.17209  | 0.00045  | 0.00555117  | yes |
| IGFBP2  | chr2:217498126-217529158       | TTD7PVmother_uv | TTD7PV_uv | OK | 1.02049  | 5.14473  | 2.33383  | 5.12028  | 5.00E-05 | 0.000851213 | yes |
| IGFBP4  | chr17:38599675-38613982        | TTD7PVmother_uv | TTD7PV_uv | OK | 804.823  | 397.368  | -1.0182  | -2.57367 | 0.0001   | 0.00155758  | yes |
| IGFBP5  | chr2:217536827-217560272       | TTD7PVmother_uv | TTD7PV_uv | OK | 8.92469  | 3.53128  | -1.33761 | -3.96368 | 5.00E-05 | 0.000851213 | yes |
| IGSF10  | chr3:150804675-151176497       | TTD7PVmother_uv | TTD7PV_uv | OK | 1.11243  | 4.65446  | 2.0649   | 3.9185   | 5.00E-05 | 0.000851213 | yes |
| IL12A   | chr3:159706622-159713806       | TTD7PVmother_uv | TTD7PV_uv | OK | 2.18918  | 0.845797 | -1.372   | -2.62568 | 0.0004   | 0.00504775  | yes |
| IL13RA2 | chrX:114238537-114252207       | TTD7PVmother_uv | TTD7PV_uv | OK | 53.8096  | 9.4513   | -2.50928 | -8.435   | 5.00E-05 | 0.000851213 | yes |
| IL18R1  | chr2:102979096-103015217       | TTD7PVmother_uv | TTD7PV_uv | OK | 0.441989 | 2.49961  | 2.49962  | 4.89116  | 5.00E-05 | 0.000851213 | yes |
| IL1RL1  | chr2:102927961-102968497       | TTD7PVmother_uv | TTD7PV_uv | OK | 3.47879  | 20.6244  | 2.5677   | 6.47526  | 5.00E-05 | 0.000851213 | yes |
| IL1RN   | chr2:113875469-113891593       | TTD7PVmother_uv | TTD7PV_uv | OK | 0.797688 | 0.138973 | -2.52102 | -2.30566 | 0.00025  | 0.00340302  | yes |
| IL20RB  | chr3:136676706-136729926       | TTD7PVmother_uv | TTD7PV_uv | OK | 20.5988  | 5.76605  | -1.83691 | -5.75456 | 5.00E-05 | 0.000851213 | yes |
| IL33    | chr9:6215785-6257983           | TTD7PVmother_uv | TTD7PV_uv | OK | 11.0432  | 3.09001  | -1.83747 | -4.69322 | 5.00E-05 | 0.000851213 | yes |
| IL6     | chr7:22766765-22771621         | TTD7PVmother_uv | TTD7PV_uv | OK | 23.8064  | 8.03884  | -1.56629 | -5.01998 | 5.00E-05 | 0.000851213 | yes |
| INA     | chr10:105036919-105050108      | TTD7PVmother_uv | TTD7PV_uv | OK | 0.739467 | 0.130815 | -2.49896 | -3.57601 | 5.00E-05 | 0.000851213 | yes |
| INMT    | chr7:30791750-30932002         | TTD7PVmother_uv | TTD7PV_uv | OK | 1.69641  | 0.423167 | -2.00319 | -2.31808 | 0.0022   | 0.0203891   | yes |
| IQCA1   | chr2:237232789-237416178       | TTD7PVmother_uv | TTD7PV_uv | OK | 0.507587 | 0.158962 | -1.67497 | -2.09226 | 0.0001   | 0.00155758  | yes |
| IRAK2   | chr3:10206562-10285427         | TTD7PVmother_uv | TTD7PV_uv | OK | 0.699621 | 0.285382 | -1.29368 | -2.14759 | 0.00145  | 0.0144679   | yes |
| IRS2    | chr13:110406183-110438914      | TTD7PVmother_uv | TTD7PV_uv | OK | 19.467   | 6.26305  | -1.63609 | -5.9734  | 5.00E-05 | 0.000851213 | yes |
| ISG15   | chr1:948846-949919             | TTD7PVmother_uv | TTD7PV_uv | OK | 13.1151  | 31.5725  | 1.26744  | 5.0124   | 5.00E-05 | 0.000851213 | yes |
| ISLR2   | chr15:74421714-74429143        | TTD7PVmother_uv | TTD7PV_uv | OK | 0.675362 | 0.118886 | -2.50609 | -3.55255 | 5.00E-05 | 0.000851213 | yes |
| ISM1    | chr20:13202417-13281297        | TTD7PVmother_uv | TTD7PV_uv | OK | 4.19701  | 1.8933   | -1.14846 | -2.45858 | 5.00E-05 | 0.000851213 | yes |
| ITGA3   | chr17:48133339-48167849        | TTD7PVmother_uv | TTD7PV_uv | OK | 11.0905  | 4.9182   | -1.17313 | -3.37901 | 5.00E-05 | 0.000851213 | yes |
| ITGA7   | chr12:56075329-56106089        | TTD7PVmother_uv | TTD7PV_uv | OK | 8.72531  | 2.1505   | -2.02053 | -5.00604 | 5.00E-05 | 0.000851213 | yes |
| ITGB3   | chr17:45331207-45390077        | TTD7PVmother_uv | TTD7PV_uv | OK | 17.1646  | 4.30247  | -1.9962  | -6.05599 | 5.00E-05 | 0.000851213 | yes |
| ITGB8   | chr7:20370724-20455382         | TTD7PVmother_uv | TTD7PV_uv | OK | 1.97804  | 0.556802 | -1.82883 | -4.82109 | 5.00E-05 | 0.000851213 | yes |

|           |                           |                 |           |    |          |          |          |          |          |             |     |
|-----------|---------------------------|-----------------|-----------|----|----------|----------|----------|----------|----------|-------------|-----|
| ITIH5     | chr10:7601231-7708961     | TTD7PVmother_uv | TTD7PV_uv | OK | 0.929046 | 4.96396  | 2.41767  | 5.01428  | 5.00E-05 | 0.000851213 | yes |
| ITPR3     | chr6:33589155-33664348    | TTD7PVmother_uv | TTD7PV_uv | OK | 27.8691  | 11.0117  | -1.33963 | -3.95543 | 5.00E-05 | 0.000851213 | yes |
| JAM2      | chr21:27011593-27089874   | TTD7PVmother_uv | TTD7PV_uv | OK | 4.45057  | 1.24528  | -1.83752 | -3.46627 | 5.00E-05 | 0.000851213 | yes |
| JPH2      | chr20:42740336-42816218   | TTD7PVmother_uv | TTD7PV_uv | OK | 2.93313  | 0.39925  | -2.87708 | -5.00834 | 5.00E-05 | 0.000851213 | yes |
| JUN       | chr1:59246462-59249785    | TTD7PVmother_uv | TTD7PV_uv | OK | 211.591  | 91.4598  | -1.21007 | -3.7711  | 5.00E-05 | 0.000851213 | yes |
| JUP       | chr17:39910858-39942964   | TTD7PVmother_uv | TTD7PV_uv | OK | 3.79378  | 1.20016  | -1.66041 | -3.64788 | 5.00E-05 | 0.000851213 | yes |
| KALRN     | chr3:123813557-124440036  | TTD7PVmother_uv | TTD7PV_uv | OK | 1.03748  | 0.2967   | -1.80601 | -2.52224 | 0.00015  | 0.00220839  | yes |
| KAZALD1   | chr10:102820998-102825351 | TTD7PVmother_uv | TTD7PV_uv | OK | 8.55423  | 22.0739  | 1.36763  | 4.64235  | 5.00E-05 | 0.000851213 | yes |
| KBTBD11   | chr8:1922043-1955109      | TTD7PVmother_uv | TTD7PV_uv | OK | 0.600464 | 1.76283  | 1.55374  | 3.88675  | 5.00E-05 | 0.000851213 | yes |
| KBTBD8    | chr3:67048726-67061632    | TTD7PVmother_uv | TTD7PV_uv | OK | 0.287369 | 0.674126 | 1.23011  | 2.259    | 0.00085  | 0.00936112  | yes |
| KCNE4     | chr2:223916647-223920357  | TTD7PVmother_uv | TTD7PV_uv | OK | 15.2708  | 7.43111  | -1.03913 | -3.36217 | 5.00E-05 | 0.000851213 | yes |
| KCNF1     | chr2:11052062-11054351    | TTD7PVmother_uv | TTD7PV_uv | OK | 0.717098 | 0.122483 | -2.54959 | -3.31379 | 0.0001   | 0.00155758  | yes |
| KCNJ15    | chr21:39601836-39673746   | TTD7PVmother_uv | TTD7PV_uv | OK | 3.16806  | 1.0976   | -1.52925 | -3.09206 | 5.00E-05 | 0.000851213 | yes |
| KCNJ2     | chr17:68165675-68176183   | TTD7PVmother_uv | TTD7PV_uv | OK | 0.605554 | 0.231102 | -1.38972 | -2.3822  | 0.0005   | 0.00606142  | yes |
| KCNJ2-AS1 | chr17:68163101-68165543   | TTD7PVmother_uv | TTD7PV_uv | OK | 0.568053 | 0.214476 | -1.4052  | -2.06758 | 0.00435  | 0.034778    | yes |
| KCNJ8     | chr12:21917888-21927755   | TTD7PVmother_uv | TTD7PV_uv | OK | 7.20699  | 2.19207  | -1.7171  | -4.54561 | 5.00E-05 | 0.000851213 | yes |
| KCNK1     | chr1:233749749-233808258  | TTD7PVmother_uv | TTD7PV_uv | OK | 8.29879  | 2.36619  | -1.81034 | -4.36831 | 5.00E-05 | 0.000851213 | yes |
| KCNK6     | chr19:38810483-38819649   | TTD7PVmother_uv | TTD7PV_uv | OK | 5.2153   | 2.21244  | -1.23711 | -3.27747 | 5.00E-05 | 0.000851213 | yes |
| KCNMB4    | chr12:70760061-70828072   | TTD7PVmother_uv | TTD7PV_uv | OK | 0.825654 | 0.188671 | -2.12966 | -3.74574 | 5.00E-05 | 0.000851213 | yes |
| KCNQ3     | chr8:133133104-133493004  | TTD7PVmother_uv | TTD7PV_uv | OK | 0.517455 | 0.196416 | -1.39752 | -2.69446 | 5.00E-05 | 0.000851213 | yes |
| KCNS2     | chr8:99439249-99443023    | TTD7PVmother_uv | TTD7PV_uv | OK | 0.630137 | 0.204337 | -1.62471 | -2.4475  | 0.00065  | 0.00748478  | yes |
| KIAA0226L | chr13:46916136-46961635   | TTD7PVmother_uv | TTD7PV_uv | OK | 0.568541 | 0.265169 | -1.10036 | -1.82942 | 0.0051   | 0.0392824   | yes |
| KIAA1161  | chr9:34368906-34376894    | TTD7PVmother_uv | TTD7PV_uv | OK | 0.895876 | 0.348564 | -1.36188 | -2.53167 | 0.00035  | 0.00451604  | yes |
| KIAA1211  | chr4:57036360-57196890    | TTD7PVmother_uv | TTD7PV_uv | OK | 0.166115 | 1.67253  | 3.33178  | 6.11323  | 5.00E-05 | 0.000851213 | yes |
| KIF26B    | chr1:245318286-245866428  | TTD7PVmother_uv | TTD7PV_uv | OK | 1.92016  | 0.78302  | -1.2941  | -3.10534 | 5.00E-05 | 0.000851213 | yes |
| KIFC2     | chr8:145691737-145701718  | TTD7PVmother_uv | TTD7PV_uv | OK | 7.13536  | 2.82997  | -1.3342  | -3.79069 | 5.00E-05 | 0.000851213 | yes |
| KLF5      | chr13:73633141-73651676   | TTD7PVmother_uv | TTD7PV_uv | OK | 0.633696 | 0.272596 | -1.21702 | -2.07259 | 0.0024   | 0.0217169   | yes |
| KLHDC7B   | chr22:50986461-50989452   | TTD7PVmother_uv | TTD7PV_uv | OK | 0.432233 | 1.59879  | 1.8871   | 3.45658  | 0.00015  | 0.00220839  | yes |
| KRT14     | chr17:39738530-39743147   | TTD7PVmother_uv | TTD7PV_uv | OK | 3.20379  | 0.533211 | -2.587   | -4.15322 | 5.00E-05 | 0.000851213 | yes |
| KRT17     | chr17:39775691-39780882   | TTD7PVmother_uv | TTD7PV_uv | OK | 1.06582  | 0.15282  | -2.80206 | -3.39734 | 0.00055  | 0.00656053  | yes |
| KRT18     | chr12:53290970-53346685   | TTD7PVmother_uv | TTD7PV_uv | OK | 11.2414  | 2.59271  | -2.11628 | -2.65058 | 5.00E-05 | 0.000851213 | yes |
| KRT34     | chr17:39533920-39538636   | TTD7PVmother_uv | TTD7PV_uv | OK | 13.4352  | 4.35827  | -1.62419 | -4.61779 | 5.00E-05 | 0.000851213 | yes |
| KRTAP1-1  | chr17:39196810-39197713   | TTD7PVmother_uv | TTD7PV_uv | OK | 9.74143  | 1.95299  | -2.31845 | -5.78003 | 5.00E-05 | 0.000851213 | yes |
| KRTAP1-5  | chr17:39182278-39183454   | TTD7PVmother_uv | TTD7PV_uv | OK | 53.1903  | 22.012   | -1.27287 | -5.07427 | 5.00E-05 | 0.000851213 | yes |
| KRTAP3-2  | chr17:39155444-39156138   | TTD7PVmother_uv | TTD7PV_uv | OK | 2.18689  | 0.138593 | -3.97995 | -3.57536 | 0.00475  | 0.0372915   | yes |
| KRTAP4-12 | chr17:39279344-39280419   | TTD7PVmother_uv | TTD7PV_uv | OK | 1.15774  | 0.140227 | -3.04547 | -3.47073 | 0.00565  | 0.042584    | yes |
| LAMC2     | chr1:183155173-183214262  | TTD7PVmother_uv | TTD7PV_uv | OK | 1.63336  | 0.630295 | -1.37374 | -2.81005 | 5.00E-05 | 0.000851213 | yes |

|              |                           |                 |           |    |           |           |          |          |          |             |     |
|--------------|---------------------------|-----------------|-----------|----|-----------|-----------|----------|----------|----------|-------------|-----|
| LAMP3        | chr3:182840002-182880667  | TTD7PVmother_uv | TTD7PV_uv | OK | 0.132661  | 1.70805   | 3.68654  | 5.21251  | 5.00E-05 | 0.000851213 | yes |
| LBH          | chr2:30454396-30482899    | TTD7PVmother_uv | TTD7PV_uv | OK | 28.5872   | 8.96827   | -1.67247 | -5.30701 | 5.00E-05 | 0.000851213 | yes |
| LDOC1        | chrX:140269930-140271310  | TTD7PVmother_uv | TTD7PV_uv | OK | 25.4875   | 4.21489   | -2.59622 | -8.04782 | 5.00E-05 | 0.000851213 | yes |
| LGALS3BP     | chr17:76967334-76976061   | TTD7PVmother_uv | TTD7PV_uv | OK | 26.5335   | 5.15602   | -2.36349 | -7.12319 | 5.00E-05 | 0.000851213 | yes |
| LGR4         | chr11:27387507-27494334   | TTD7PVmother_uv | TTD7PV_uv | OK | 34.4051   | 72.179    | 1.06896  | 3.7109   | 5.00E-05 | 0.000851213 | yes |
| LGR5         | chr12:71833812-71978621   | TTD7PVmother_uv | TTD7PV_uv | OK | 0.289636  | 11.94     | 5.36542  | 10.3603  | 5.00E-05 | 0.000851213 | yes |
| LIF          | chr22:30636435-30642840   | TTD7PVmother_uv | TTD7PV_uv | OK | 64.3122   | 17.3596   | -1.88936 | -5.73217 | 5.00E-05 | 0.000851213 | yes |
| LIMCH1       | chr4:41362803-41702061    | TTD7PVmother_uv | TTD7PV_uv | OK | 6.66729   | 1.55343   | -2.10165 | -4.93205 | 5.00E-05 | 0.000851213 | yes |
| LINC00116    | chr2:110969105-110980517  | TTD7PVmother_uv | TTD7PV_uv | OK | 4.5542    | 9.67737   | 1.08742  | 3.10678  | 5.00E-05 | 0.000851213 | yes |
| LINC00263    | chr10:102133332-102148111 | TTD7PVmother_uv | TTD7PV_uv | OK | 1.17891   | 2.45112   | 1.05598  | 2.18491  | 0.0066   | 0.0477225   | yes |
| LINC00341    | chr14:95873603-95876427   | TTD7PVmother_uv | TTD7PV_uv | OK | 1.16051   | 2.3434    | 1.01384  | 2.1717   | 0.00075  | 0.00843633  | yes |
| LINC00472    | chr6:72124148-72130448    | TTD7PVmother_uv | TTD7PV_uv | OK | 1.55647   | 0.684655  | -1.18483 | -2.46545 | 0.00115  | 0.0119464   | yes |
| LINC00478    | chr21:17442841-17982094   | TTD7PVmother_uv | TTD7PV_uv | OK | 0.287394  | 0.881693  | 1.61724  | 2.65628  | 5.00E-05 | 0.000851213 | yes |
| LINC00565    | chr13:114629486-114631964 | TTD7PVmother_uv | TTD7PV_uv | OK | 3.13647   | 1.40071   | -1.16298 | -2.65608 | 0.0002   | 0.00284504  | yes |
| LINC00578    | chr3:177159708-177470492  | TTD7PVmother_uv | TTD7PV_uv | OK | 0.889665  | 0.155672  | -2.51476 | -2.85238 | 0.0033   | 0.0280145   | yes |
| LINC00607    | chr2:216476285-216708259  | TTD7PVmother_uv | TTD7PV_uv | OK | 0.92984   | 0.337156  | -1.46357 | -2.59101 | 0.00025  | 0.00340302  | yes |
| LINC00649    | chr21:35303515-35343487   | TTD7PVmother_uv | TTD7PV_uv | OK | 0.0698526 | 0.571211  | 3.03164  | 3.42694  | 0.0005   | 0.00606142  | yes |
| LINC00842    | chr10:47096453-47151400   | TTD7PVmother_uv | TTD7PV_uv | OK | 1.8154    | 0.569651  | -1.67214 | -2.98169 | 5.00E-05 | 0.000851213 | yes |
| LIPC         | chr15:58724174-58861073   | TTD7PVmother_uv | TTD7PV_uv | OK | 1.31259   | 2.86695   | 1.1271   | 2.47792  | 0.00095  | 0.0102305   | yes |
| LIPT1        | chr2:99771417-99779613    | TTD7PVmother_uv | TTD7PV_uv | OK | 1.08842   | 2.31691   | 1.08997  | 1.80004  | 0.0016   | 0.0156192   | yes |
| LMCD1        | chr3:8543510-8609806      | TTD7PVmother_uv | TTD7PV_uv | OK | 56.9847   | 28.1881   | -1.01549 | -3.76888 | 5.00E-05 | 0.000851213 | yes |
| LMO7         | chr13:76194569-76434006   | TTD7PVmother_uv | TTD7PV_uv | OK | 83.664    | 40.2212   | -1.05665 | -2.73505 | 5.00E-05 | 0.000851213 | yes |
| LMOD1        | chr1:201865583-201915716  | TTD7PVmother_uv | TTD7PV_uv | OK | 5.44873   | 1.26208   | -2.11011 | -4.56087 | 5.00E-05 | 0.000851213 | yes |
| LOC100130417 | chr1:852952-854817        | TTD7PVmother_uv | TTD7PV_uv | OK | 2.28449   | 5.71418   | 1.32267  | 3.79749  | 0.0033   | 0.0280145   | yes |
| LOC100130992 | chr10:22541000-22547477   | TTD7PVmother_uv | TTD7PV_uv | OK | 0.520647  | 1.12841   | 1.11591  | 2.59213  | 0.0001   | 0.00155758  | yes |
| LOC100505633 | chr1:159931013-159948876  | TTD7PVmother_uv | TTD7PV_uv | OK | 15.1792   | 34.923    | 1.20208  | 4.08448  | 5.00E-05 | 0.000851213 | yes |
| LOC100505695 | chr2:171627603-171634757  | TTD7PVmother_uv | TTD7PV_uv | OK | 0.633827  | 2.23224   | 1.81633  | 2.2335   | 0.00015  | 0.00220839  | yes |
| LOC100506385 | chr21:36118121-36157168   | TTD7PVmother_uv | TTD7PV_uv | OK | 1.08583   | 0.367866  | -1.56155 | -1.92395 | 0.0049   | 0.0381138   | yes |
| LOC255167    | chr5:6582286-6588613      | TTD7PVmother_uv | TTD7PV_uv | OK | 0.587138  | 0.0398614 | -3.88063 | -2.7849  | 0.00155  | 0.015237    | yes |
| LOC284023    | chr17:7816639-7819265     | TTD7PVmother_uv | TTD7PV_uv | OK | 2.64798   | 0.476162  | -2.47537 | -5.02137 | 5.00E-05 | 0.000851213 | yes |
| LOC284344    | chr19:43715942-43752798   | TTD7PVmother_uv | TTD7PV_uv | OK | 0.660665  | 0.0984692 | -2.74618 | -2.8985  | 0.00225  | 0.020746    | yes |
| LOC285084    | chr2:175190754-175195370  | TTD7PVmother_uv | TTD7PV_uv | OK | 4.6546    | 0.207649  | -4.48644 | -8.07639 | 5.00E-05 | 0.000851213 | yes |
| LOC339524    | chr1:87595447-87634886    | TTD7PVmother_uv | TTD7PV_uv | OK | 0.826117  | 0.0592057 | -3.80254 | -2.65949 | 5.00E-05 | 0.000851213 | yes |
| LOC619207    | chr10:135267431-135281953 | TTD7PVmother_uv | TTD7PV_uv | OK | 0.620329  | 0.305231  | -1.02313 | -1.84039 | 0.0025   | 0.022429    | yes |
| LOC654342    | chr2:91824708-91847975    | TTD7PVmother_uv | TTD7PV_uv | OK | 11.6498   | 29.0267   | 1.31708  | 5.13325  | 5.00E-05 | 0.000851213 | yes |
| LOC654433    | chr2:113973573-114036498  | TTD7PVmother_uv | TTD7PV_uv | OK | 14.6678   | 0.168672  | -6.44229 | -9.15765 | 5.00E-05 | 0.000851213 | yes |
| LOC730091    | chr3:156465131-156534851  | TTD7PVmother_uv | TTD7PV_uv | OK | 1.24631   | 0.567955  | -1.13381 | -2.26549 | 0.0009   | 0.0098346   | yes |

|          |                                |                 |           |    |          |           |          |          |          |             |     |
|----------|--------------------------------|-----------------|-----------|----|----------|-----------|----------|----------|----------|-------------|-----|
| LRIG1    | chr3:66119284-66550845         | TTD7PVmother_uv | TTD7PV_uv | OK | 6.44354  | 2.9106    | -1.14654 | -2.11147 | 0.0005   | 0.00606142  | yes |
| LRR15    | chr3:194075975-194090472       | TTD7PVmother_uv | TTD7PV_uv | OK | 109.207  | 36.9342   | -1.56404 | -4.31684 | 5.00E-05 | 0.000851213 | yes |
| LRR17    | chr7:102453307-102715288       | TTD7PVmother_uv | TTD7PV_uv | OK | 0.858301 | 2.49721   | 1.54076  | 2.67359  | 5.00E-05 | 0.000851213 | yes |
| LRR2     | chr3:46556877-46608040         | TTD7PVmother_uv | TTD7PV_uv | OK | 7.45836  | 3.12882   | -1.25324 | -3.69411 | 5.00E-05 | 0.000851213 | yes |
| LRR32    | chr11:76368567-76381791        | TTD7PVmother_uv | TTD7PV_uv | OK | 104.484  | 24.2548   | -2.10694 | -5.39142 | 5.00E-05 | 0.000851213 | yes |
| LRR8E    | chr19:7953389-7966908          | TTD7PVmother_uv | TTD7PV_uv | OK | 2.6161   | 0.677529  | -1.94906 | -3.88046 | 5.00E-05 | 0.000851213 | yes |
| LY6K     | chr8:143781528-143808391       | TTD7PVmother_uv | TTD7PV_uv | OK | 5.74651  | 16.2956   | 1.50373  | 3.99887  | 5.00E-05 | 0.000851213 | yes |
| LYN      | chr8:56792385-56925006         | TTD7PVmother_uv | TTD7PV_uv | OK | 1.17937  | 0.327488  | -1.84849 | -3.32051 | 5.00E-05 | 0.000851213 | yes |
| LYNX1    | chr8:143845755-143859640       | TTD7PVmother_uv | TTD7PV_uv | OK | 17.3326  | 7.23532   | -1.26036 | -3.69279 | 5.00E-05 | 0.000851213 | yes |
| LYPD3    | chr19:43964945-43969831        | TTD7PVmother_uv | TTD7PV_uv | OK | 0.893442 | 0.0782109 | -3.51393 | -3.21015 | 0.00405  | 0.0328367   | yes |
| MAGI1    | chr3:65339905-66024509         | TTD7PVmother_uv | TTD7PV_uv | OK | 6.22617  | 2.51752   | -1.30634 | -3.81476 | 5.00E-05 | 0.000851213 | yes |
| MALAT1   | chr11:65265232-65273939        | TTD7PVmother_uv | TTD7PV_uv | OK | 97.7956  | 42.8717   | -1.18974 | -3.30011 | 5.00E-05 | 0.000851213 | yes |
| MALL     | chr2:110841446-110874143       | TTD7PVmother_uv | TTD7PV_uv | OK | 10.1897  | 25.7014   | 1.33474  | 4.29208  | 5.00E-05 | 0.000851213 | yes |
| MAMDC2   | chr9:72658496-72873790         | TTD7PVmother_uv | TTD7PV_uv | OK | 0.592391 | 0.117393  | -2.33521 | -2.5396  | 0.00465  | 0.0367347   | yes |
| MAOA     | chrX:43514154-43606071         | TTD7PVmother_uv | TTD7PV_uv | OK | 1.30659  | 0.0799281 | -4.03096 | -5.5505  | 5.00E-05 | 0.000851213 | yes |
| MAP6     | chr11:75297962-75379479        | TTD7PVmother_uv | TTD7PV_uv | OK | 5.23818  | 1.053     | -2.31457 | -4.73712 | 5.00E-05 | 0.000851213 | yes |
| MBP      | chr18:74690788-74844774        | TTD7PVmother_uv | TTD7PV_uv | OK | 2.12074  | 0.450993  | -2.23339 | -3.91492 | 5.00E-05 | 0.000851213 | yes |
| MC4R     | chr18:58038563-58040001        | TTD7PVmother_uv | TTD7PV_uv | OK | 0.444159 | 1.17403   | 1.40233  | 2.24836  | 0.00465  | 0.0367347   | yes |
| MCOLN3   | chr1:85483764-85514223         | TTD7PVmother_uv | TTD7PV_uv | OK | 1.42463  | 0.381053  | -1.90252 | -3.11265 | 5.00E-05 | 0.000851213 | yes |
| MEIS3    | chr19:47906374-47922785        | TTD7PVmother_uv | TTD7PV_uv | OK | 19.5953  | 7.0267    | -1.47959 | -4.05515 | 5.00E-05 | 0.000851213 | yes |
| METTL24  | chr6:110567148-110679475       | TTD7PVmother_uv | TTD7PV_uv | OK | 2.40312  | 0.733694  | -1.71166 | -3.15819 | 0.0002   | 0.00284504  | yes |
| MFSD7    | chr4:671710-682973             | TTD7PVmother_uv | TTD7PV_uv | OK | 7.57323  | 1.33737   | -2.50151 | -3.76204 | 5.00E-05 | 0.000851213 | yes |
| MGARP    | chr4:140187316-140201492       | TTD7PVmother_uv | TTD7PV_uv | OK | 12.8661  | 3.46197   | -1.8939  | -5.07156 | 5.00E-05 | 0.000851213 | yes |
| MGP      | chr12:15034114-15038853        | TTD7PVmother_uv | TTD7PV_uv | OK | 4.48696  | 9.69814   | 1.11197  | 2.53316  | 5.00E-05 | 0.000851213 | yes |
| MICA     | chr6_ssto_hap7:2701358-2716888 | TTD7PVmother_uv | TTD7PV_uv | OK | 26.3271  | 9.79011   | -1.42715 | -3.81502 | 5.00E-05 | 0.000851213 | yes |
| MIR210HG | chr11:565656-568457            | TTD7PVmother_uv | TTD7PV_uv | OK | 1.84752  | 0.481323  | -1.94051 | -3.13785 | 5.00E-05 | 0.000851213 | yes |
| MLPH     | chr2:238395877-238463961       | TTD7PVmother_uv | TTD7PV_uv | OK | 1.15853  | 0.180085  | -2.68555 | -3.91911 | 5.00E-05 | 0.000851213 | yes |
| MMD      | chr17:53469973-53499341        | TTD7PVmother_uv | TTD7PV_uv | OK | 2.38684  | 1.11381   | -1.0996  | -2.67957 | 0.00065  | 0.00748478  | yes |
| MMP10    | chr11:102641232-102651359      | TTD7PVmother_uv | TTD7PV_uv | OK | 2.78974  | 0.422396  | -2.72346 | -4.83019 | 5.00E-05 | 0.000851213 | yes |
| MMP12    | chr11:102733463-102745764      | TTD7PVmother_uv | TTD7PV_uv | OK | 3.38599  | 0.675119  | -2.32636 | -4.34248 | 5.00E-05 | 0.000851213 | yes |
| MMP15    | chr16:58059281-58080804        | TTD7PVmother_uv | TTD7PV_uv | OK | 4.20911  | 2.06177   | -1.02963 | -2.85914 | 5.00E-05 | 0.000851213 | yes |
| MMP3     | chr11:102654406-102714342      | TTD7PVmother_uv | TTD7PV_uv | OK | 233.377  | 77.7796   | -1.5852  | -1.77779 | 0.00375  | 0.0309406   | yes |
| MMS19    | chr10:99218080-99258366        | TTD7PVmother_uv | TTD7PV_uv | OK | 6.43011  | 15.8963   | 1.30578  | 4.36085  | 5.00E-05 | 0.000851213 | yes |
| MNS1     | chr15:56657643-56757335        | TTD7PVmother_uv | TTD7PV_uv | OK | 1.06517  | 2.17211   | 1.02801  | 1.59327  | 0.0042   | 0.0338141   | yes |
| MOXD1    | chr6:132617193-132722664       | TTD7PVmother_uv | TTD7PV_uv | OK | 63.3553  | 27.5928   | -1.19918 | -4.1454  | 5.00E-05 | 0.000851213 | yes |
| MRAP2    | chr6:84743419-84800605         | TTD7PVmother_uv | TTD7PV_uv | OK | 2.19611  | 0.523725  | -2.06807 | -3.87523 | 5.00E-05 | 0.000851213 | yes |
| MREG     | chr2:216807313-216878346       | TTD7PVmother_uv | TTD7PV_uv | OK | 1.81574  | 0.803197  | -1.17673 | -2.5304  | 0.0003   | 0.00396402  | yes |

|         |                           |                 |           |    |          |           |          |          |          |             |     |
|---------|---------------------------|-----------------|-----------|----|----------|-----------|----------|----------|----------|-------------|-----|
| MRVI1   | chr11:10562782-10715535   | TTD7PVmother_uv | TTD7PV_uv | OK | 4.07286  | 0.177224  | -4.5224  | -8.10038 | 5.00E-05 | 0.000851213 | yes |
| MSR1    | chr8:15965386-16050300    | TTD7PVmother_uv | TTD7PV_uv | OK | 0.122327 | 0.836773  | 2.77409  | 3.45642  | 5.00E-05 | 0.000851213 | yes |
| MSTN    | chr2:190920425-190927455  | TTD7PVmother_uv | TTD7PV_uv | OK | 0.517292 | 3.64049   | 2.81508  | 5.6288   | 5.00E-05 | 0.000851213 | yes |
| MSX2    | chr5:174151574-174157902  | TTD7PVmother_uv | TTD7PV_uv | OK | 0.673163 | 0.184216  | -1.86956 | -2.78187 | 0.00155  | 0.015237    | yes |
| MX1     | chr21:42792519-42831141   | TTD7PVmother_uv | TTD7PV_uv | OK | 0.809738 | 1.97824   | 1.28869  | 2.4044   | 5.00E-05 | 0.000851213 | yes |
| MYBL2   | chr20:42295708-42345122   | TTD7PVmother_uv | TTD7PV_uv | OK | 4.33971  | 9.12567   | 1.07233  | 3.02836  | 5.00E-05 | 0.000851213 | yes |
| MYEOV   | chr11:69061621-69064754   | TTD7PVmother_uv | TTD7PV_uv | OK | 0.611089 | 0.114114  | -2.4209  | -3.03693 | 0.00055  | 0.00656053  | yes |
| MYL9    | chr20:35169886-35178226   | TTD7PVmother_uv | TTD7PV_uv | OK | 598.735  | 290.753   | -1.04212 | -2.75732 | 5.00E-05 | 0.000851213 | yes |
| MYLK    | chr3:123304402-123603149  | TTD7PVmother_uv | TTD7PV_uv | OK | 27.7989  | 7.1684    | -1.95531 | -4.95606 | 5.00E-05 | 0.000851213 | yes |
| NBL1    | chr1:19923470-19984949    | TTD7PVmother_uv | TTD7PV_uv | OK | 150.092  | 70.9329   | -1.08132 | -2.7184  | 5.00E-05 | 0.000851213 | yes |
| NCKAP5  | chr2:133429371-134326031  | TTD7PVmother_uv | TTD7PV_uv | OK | 0.287297 | 0.728702  | 1.34279  | 2.05591  | 0.00065  | 0.00748478  | yes |
| NDRG2   | chr14:21484921-21493935   | TTD7PVmother_uv | TTD7PV_uv | OK | 0.999659 | 0.24089   | -2.05306 | -2.35355 | 0.0001   | 0.00155758  | yes |
| NDRG4   | chr16:58497548-58547523   | TTD7PVmother_uv | TTD7PV_uv | OK | 1.52701  | 0.67428   | -1.17929 | -2.09735 | 0.00035  | 0.00451604  | yes |
| NEFH    | chr22:29876180-29887277   | TTD7PVmother_uv | TTD7PV_uv | OK | 0.415816 | 0.90838   | 1.12735  | 1.91987  | 0.0011   | 0.0115122   | yes |
| NEGR1   | chr1:71868624-72748277    | TTD7PVmother_uv | TTD7PV_uv | OK | 5.21384  | 2.46485   | -1.08085 | -3.32052 | 5.00E-05 | 0.000851213 | yes |
| NEK10   | chr3:27257096-27410912    | TTD7PVmother_uv | TTD7PV_uv | OK | 0.996059 | 0.295293  | -1.75408 | -2.80398 | 0.00015  | 0.00220839  | yes |
| NKX3-1  | chr8:23536205-23540450    | TTD7PVmother_uv | TTD7PV_uv | OK | 6.57091  | 2.5181    | -1.38375 | -3.60131 | 5.00E-05 | 0.000851213 | yes |
| NOTCH3  | chr19:15270443-15311792   | TTD7PVmother_uv | TTD7PV_uv | OK | 7.03686  | 1.61189   | -2.12618 | -6.52119 | 5.00E-05 | 0.000851213 | yes |
| NPM3    | chr10:103541081-103543170 | TTD7PVmother_uv | TTD7PV_uv | OK | 19.0548  | 38.8702   | 1.02851  | 4.11234  | 5.00E-05 | 0.000851213 | yes |
| NPR1    | chr1:153651163-153666468  | TTD7PVmother_uv | TTD7PV_uv | OK | 3.39797  | 0.212927  | -3.99625 | -7.26302 | 5.00E-05 | 0.000851213 | yes |
| NPTX2   | chr7:98246596-98259181    | TTD7PVmother_uv | TTD7PV_uv | OK | 0.418956 | 1.10687   | 1.40161  | 2.45458  | 0.0008   | 0.00892721  | yes |
| NPTXR   | chr22:39214455-39240017   | TTD7PVmother_uv | TTD7PV_uv | OK | 4.77529  | 1.94732   | -1.2941  | -3.72086 | 5.00E-05 | 0.000851213 | yes |
| NQO1    | chr16:69743303-69760533   | TTD7PVmother_uv | TTD7PV_uv | OK | 63.6393  | 143.753   | 1.1756   | 3.62003  | 5.00E-05 | 0.000851213 | yes |
| NR4A3   | chr9:102584136-102629173  | TTD7PVmother_uv | TTD7PV_uv | OK | 8.38209  | 3.79835   | -1.14194 | -2.4627  | 5.00E-05 | 0.000851213 | yes |
| NRG1    | chr8:31497267-32622558    | TTD7PVmother_uv | TTD7PV_uv | OK | 7.95391  | 18.1951   | 1.19382  | 2.99793  | 5.00E-05 | 0.000851213 | yes |
| NRP2    | chr2:206547223-206662857  | TTD7PVmother_uv | TTD7PV_uv | OK | 9.2126   | 4.39856   | -1.06658 | -2.87713 | 5.00E-05 | 0.000851213 | yes |
| NTNG1   | chr1:107682628-108024475  | TTD7PVmother_uv | TTD7PV_uv | OK | 3.50258  | 7.68748   | 1.13409  | 2.87024  | 5.00E-05 | 0.000851213 | yes |
| NTRK2   | chr9:87283465-87638505    | TTD7PVmother_uv | TTD7PV_uv | OK | 0.192931 | 0.741124  | 1.94163  | 3.15562  | 5.00E-05 | 0.000851213 | yes |
| NXPH3   | chr17:47653297-47661171   | TTD7PVmother_uv | TTD7PV_uv | OK | 0.648453 | 0.0671115 | -3.27237 | -4.39591 | 5.00E-05 | 0.000851213 | yes |
| OIP5    | chr15:41601465-41624819   | TTD7PVmother_uv | TTD7PV_uv | OK | 2.19323  | 4.43274   | 1.01514  | 2.4339   | 0.0018   | 0.0172255   | yes |
| OSBP2   | chr22:31090792-31303811   | TTD7PVmother_uv | TTD7PV_uv | OK | 0.892324 | 0.431562  | -1.048   | -1.78317 | 0.0016   | 0.0156192   | yes |
| OSBPL7  | chr17:45884732-45899147   | TTD7PVmother_uv | TTD7PV_uv | OK | 1.19944  | 2.48937   | 1.05342  | 2.40673  | 0.00025  | 0.00340302  | yes |
| OSCAR   | chr19:54597932-54604148   | TTD7PVmother_uv | TTD7PV_uv | OK | 1.53582  | 0.387889  | -1.98529 | -2.19864 | 0.0001   | 0.00155758  | yes |
| OSR2    | chr8:99956630-99964326    | TTD7PVmother_uv | TTD7PV_uv | OK | 15.2735  | 4.90558   | -1.63854 | -4.17957 | 5.00E-05 | 0.000851213 | yes |
| OTUD1   | chr10:23728197-23731310   | TTD7PVmother_uv | TTD7PV_uv | OK | 5.45032  | 2.06165   | -1.40255 | -4.02525 | 5.00E-05 | 0.000851213 | yes |
| OXTR    | chr3:8792094-8811300      | TTD7PVmother_uv | TTD7PV_uv | OK | 23.6266  | 11.3468   | -1.05813 | -3.16472 | 5.00E-05 | 0.000851213 | yes |
| PABPC4L | chr4:135117488-135122903  | TTD7PVmother_uv | TTD7PV_uv | OK | 0.632592 | 1.38703   | 1.13265  | 2.65298  | 0.00025  | 0.00340302  | yes |



|         |                          |                 |           |    |          |           |          |          |          |             |     |
|---------|--------------------------|-----------------|-----------|----|----------|-----------|----------|----------|----------|-------------|-----|
| PALLD   | chr4:169418216-169849608 | TTD7PVmother_uv | TTD7PV_uv | OK | 24.5868  | 11.2384   | -1.12944 | -3.62617 | 5.00E-05 | 0.000851213 | yes |
| PAPPA2  | chr1:176432306-176811970 | TTD7PVmother_uv | TTD7PV_uv | OK | 2.03548  | 12.6954   | 2.64086  | 7.27937  | 5.00E-05 | 0.000851213 | yes |
| PARD6G  | chr18:77905806-78005397  | TTD7PVmother_uv | TTD7PV_uv | OK | 1.89028  | 0.836268  | -1.17656 | -2.38226 | 0.0001   | 0.00155758  | yes |
| PAX8    | chr2:113973573-114036498 | TTD7PVmother_uv | TTD7PV_uv | OK | 0.606657 | 0.0495848 | -3.61291 | -2.48712 | 5.00E-05 | 0.000851213 | yes |
| PBX3    | chr9:128509616-128729655 | TTD7PVmother_uv | TTD7PV_uv | OK | 11.3817  | 5.35427   | -1.08796 | -3.09407 | 5.00E-05 | 0.000851213 | yes |
| PBX4    | chr19:19672515-19729725  | TTD7PVmother_uv | TTD7PV_uv | OK | 0.536722 | 0.146934  | -1.86901 | -1.73333 | 0.00435  | 0.034778    | yes |
| PCDH1   | chr5:141232672-141257944 | TTD7PVmother_uv | TTD7PV_uv | OK | 0.55048  | 1.17087   | 1.08881  | 1.95384  | 0.00105  | 0.0111179   | yes |
| PCDH10  | chr4:134070469-134112732 | TTD7PVmother_uv | TTD7PV_uv | OK | 2.3793   | 11.0743   | 2.2186   | 6.34958  | 5.00E-05 | 0.000851213 | yes |
| PCDH7   | chr4:30722029-31148423   | TTD7PVmother_uv | TTD7PV_uv | OK | 3.6093   | 0.818944  | -2.13988 | -4.77414 | 5.00E-05 | 0.000851213 | yes |
| PCDHB10 | chr5:140571951-140575213 | TTD7PVmother_uv | TTD7PV_uv | OK | 0.63817  | 0.256685  | -1.31394 | -2.24345 | 0.00175  | 0.0168363   | yes |
| PCDHB16 | chr5:140560979-140565796 | TTD7PVmother_uv | TTD7PV_uv | OK | 1.02952  | 0.506617  | -1.02301 | -2.13696 | 0.0011   | 0.0115122   | yes |
| PCDHB5  | chr5:140514799-140517704 | TTD7PVmother_uv | TTD7PV_uv | OK | 0.572595 | 1.43642   | 1.32689  | 2.57748  | 0.0002   | 0.00284505  | yes |
| PCSK1   | chr5:95726039-95768985   | TTD7PVmother_uv | TTD7PV_uv | OK | 0.875444 | 2.60839   | 1.57508  | 3.56931  | 5.00E-05 | 0.000851213 | yes |
| PCSK1N  | chrX:48689503-48694036   | TTD7PVmother_uv | TTD7PV_uv | OK | 2.26578  | 11.0723   | 2.28888  | 6.19001  | 5.00E-05 | 0.000851213 | yes |
| PCSK5   | chr9:78505559-78977255   | TTD7PVmother_uv | TTD7PV_uv | OK | 4.38424  | 2.0386    | -1.10475 | -2.4985  | 5.00E-05 | 0.000851213 | yes |
| PCSK9   | chr1:55505148-55530526   | TTD7PVmother_uv | TTD7PV_uv | OK | 7.267    | 14.7997   | 1.02613  | 3.18829  | 5.00E-05 | 0.000851213 | yes |
| PDE1C   | chr7:31792631-32338383   | TTD7PVmother_uv | TTD7PV_uv | OK | 3.29918  | 6.95387   | 1.07571  | 2.3187   | 5.00E-05 | 0.000851213 | yes |
| PDE4B   | chr1:66258192-66840262   | TTD7PVmother_uv | TTD7PV_uv | OK | 2.07808  | 0.7287    | -1.51186 | -2.9452  | 5.00E-05 | 0.000851213 | yes |
| PDGFRL  | chr8:17433941-17500642   | TTD7PVmother_uv | TTD7PV_uv | OK | 6.39569  | 2.94646   | -1.11812 | -2.86669 | 5.00E-05 | 0.000851213 | yes |
| PEX6    | chr6:42928499-42946981   | TTD7PVmother_uv | TTD7PV_uv | OK | 3.74108  | 8.85639   | 1.24326  | 3.48218  | 5.00E-05 | 0.000851213 | yes |
| PFKFB4  | chr3:48555116-48594227   | TTD7PVmother_uv | TTD7PV_uv | OK | 0.691315 | 0.323254  | -1.09668 | -1.82983 | 0.00575  | 0.0431318   | yes |
| PGM2L1  | chr11:74041360-74109502  | TTD7PVmother_uv | TTD7PV_uv | OK | 1.76681  | 0.844457  | -1.06505 | -2.84665 | 5.00E-05 | 0.000851213 | yes |
| PHGDH   | chr1:120254418-120286849 | TTD7PVmother_uv | TTD7PV_uv | OK | 89.7248  | 205.478   | 1.1954   | 3.98494  | 5.00E-05 | 0.000851213 | yes |
| PIANP   | chr12:6802956-6810009    | TTD7PVmother_uv | TTD7PV_uv | OK | 1.69006  | 0.6467    | -1.38591 | -2.36489 | 0.0001   | 0.00155758  | yes |
| PIK3IP1 | chr22:31677578-31688520  | TTD7PVmother_uv | TTD7PV_uv | OK | 17.8083  | 5.15735   | -1.78785 | -4.85794 | 5.00E-05 | 0.000851213 | yes |
| PINLYP  | chr19:44080951-44086256  | TTD7PVmother_uv | TTD7PV_uv | OK | 2.13613  | 6.20039   | 1.53736  | 2.2492   | 0.00095  | 0.0102305   | yes |
| PIR     | chrX:15363712-15511711   | TTD7PVmother_uv | TTD7PV_uv | OK | 3.08236  | 6.41546   | 1.05752  | 2.23694  | 0.0002   | 0.00284504  | yes |
| PITPNM3 | chr17:6354582-6459877    | TTD7PVmother_uv | TTD7PV_uv | OK | 1.20149  | 0.288075  | -2.06031 | -3.85268 | 5.00E-05 | 0.000851213 | yes |
| PITX1   | chr5:134363423-134369964 | TTD7PVmother_uv | TTD7PV_uv | OK | 0.917855 | 0.0673667 | -3.76816 | -4.01769 | 0.00065  | 0.00748478  | yes |
| PLCB4   | chr20:9049700-9461462    | TTD7PVmother_uv | TTD7PV_uv | OK | 3.43016  | 0.95224   | -1.84888 | -4.32173 | 5.00E-05 | 0.000851213 | yes |
| PLCL1   | chr2:198669425-199014608 | TTD7PVmother_uv | TTD7PV_uv | OK | 0.772327 | 0.315994  | -1.28932 | -2.51073 | 0.00025  | 0.00340302  | yes |
| PLD1    | chr3:171318194-171528284 | TTD7PVmother_uv | TTD7PV_uv | OK | 0.6113   | 1.252     | 1.03428  | 2.15287  | 0.00035  | 0.00451604  | yes |
| PLEKHA6 | chr1:204187978-204329057 | TTD7PVmother_uv | TTD7PV_uv | OK | 1.01338  | 0.264185  | -1.93955 | -3.8175  | 5.00E-05 | 0.000851213 | yes |
| PLEKHO2 | chr15:65134081-65160201  | TTD7PVmother_uv | TTD7PV_uv | OK | 11.005   | 5.39899   | -1.0274  | -3.02268 | 5.00E-05 | 0.000851213 | yes |
| PLXNB1  | chr3:48445260-48471460   | TTD7PVmother_uv | TTD7PV_uv | OK | 10.8576  | 4.69796   | -1.2086  | -3.69576 | 5.00E-05 | 0.000851213 | yes |
| PLXNB3  | chrX:153029650-153044801 | TTD7PVmother_uv | TTD7PV_uv | OK | 3.37735  | 1.12396   | -1.58731 | -4.03757 | 5.00E-05 | 0.000851213 | yes |
| PLXNC1  | chr12:94542498-94701451  | TTD7PVmother_uv | TTD7PV_uv | OK | 2.63733  | 0.772212  | -1.77201 | -3.28842 | 5.00E-05 | 0.000851213 | yes |

|           |                           |                 |           |    |          |          |          |          |          |             |     |
|-----------|---------------------------|-----------------|-----------|----|----------|----------|----------|----------|----------|-------------|-----|
| PMP22     | chr17:15133095-15168644   | TTD7PVmother_uv | TTD7PV_uv | OK | 202.706  | 88.8976  | -1.18918 | -3.58389 | 5.00E-05 | 0.000851213 | yes |
| PNMAL1    | chr19:46969747-46974820   | TTD7PVmother_uv | TTD7PV_uv | OK | 3.72866  | 0.726965 | -2.3587  | -4.85462 | 5.00E-05 | 0.000851213 | yes |
| PNMAL2    | chr19:46984044-47104457   | TTD7PVmother_uv | TTD7PV_uv | OK | 1.32729  | 0.643125 | -1.04531 | -1.9704  | 0.00055  | 0.00656053  | yes |
| PNPLA7    | chr9:140354404-140444986  | TTD7PVmother_uv | TTD7PV_uv | OK | 1.07293  | 0.321443 | -1.73892 | -3.06641 | 5.00E-05 | 0.000851213 | yes |
| POSTN     | chr13:38136718-38172981   | TTD7PVmother_uv | TTD7PV_uv | OK | 218.469  | 932.429  | 2.09357  | 2.92413  | 5.00E-05 | 0.000851213 | yes |
| PPAP2C    | chr19:281043-291435       | TTD7PVmother_uv | TTD7PV_uv | OK | 6.47769  | 2.60493  | -1.31423 | -2.57371 | 5.00E-05 | 0.000851213 | yes |
| PPAPDC3   | chr9:134165080-134184649  | TTD7PVmother_uv | TTD7PV_uv | OK | 2.06494  | 0.371649 | -2.47409 | -4.28584 | 5.00E-05 | 0.000851213 | yes |
| PPFIA4    | chr1:203020310-203047864  | TTD7PVmother_uv | TTD7PV_uv | OK | 0.920765 | 0.211894 | -2.11949 | -3.49294 | 5.00E-05 | 0.000851213 | yes |
| PPFIBP2   | chr11:7534995-7674996     | TTD7PVmother_uv | TTD7PV_uv | OK | 6.34976  | 2.69676  | -1.23547 | -3.04725 | 5.00E-05 | 0.000851213 | yes |
| PPP1R14A  | chr19:38741876-38747231   | TTD7PVmother_uv | TTD7PV_uv | OK | 7.22301  | 0.563495 | -3.68013 | -3.54592 | 5.00E-05 | 0.000851213 | yes |
| PPP1R1C   | chr2:182818967-182996109  | TTD7PVmother_uv | TTD7PV_uv | OK | 0.494569 | 0.129298 | -1.93547 | -1.37319 | 0.00635  | 0.0465004   | yes |
| PPP1R3C   | chr10:93388196-93392858   | TTD7PVmother_uv | TTD7PV_uv | OK | 67.7063  | 32.832   | -1.04419 | -3.76421 | 5.00E-05 | 0.000851213 | yes |
| PPP1R3G   | chr6:5085719-5087455      | TTD7PVmother_uv | TTD7PV_uv | OK | 3.19576  | 1.06965  | -1.57901 | -3.44355 | 5.00E-05 | 0.000851213 | yes |
| PRDM16    | chr1:2985741-3355185      | TTD7PVmother_uv | TTD7PV_uv | OK | 0.194381 | 0.905161 | 2.21929  | 4.02064  | 5.00E-05 | 0.000851213 | yes |
| PRELP     | chr1:203444882-203460479  | TTD7PVmother_uv | TTD7PV_uv | OK | 4.65977  | 0.843125 | -2.46644 | -5.82984 | 5.00E-05 | 0.000851213 | yes |
| PRICKLE1  | chr12:42852139-42983572   | TTD7PVmother_uv | TTD7PV_uv | OK | 1.33673  | 0.62506  | -1.09664 | -2.09095 | 0.0004   | 0.00504775  | yes |
| PRIM1     | chr12:57125363-57146146   | TTD7PVmother_uv | TTD7PV_uv | OK | 1.71932  | 3.72208  | 1.11427  | 2.52514  | 0.00055  | 0.00656053  | yes |
| PRIMA1    | chr14:94184643-94254766   | TTD7PVmother_uv | TTD7PV_uv | OK | 0.768618 | 0.185195 | -2.05322 | -3.18421 | 5.00E-05 | 0.000851213 | yes |
| PROSAPIP1 | chr20:3143272-3149207     | TTD7PVmother_uv | TTD7PV_uv | OK | 3.82267  | 1.87817  | -1.02525 | -2.89587 | 5.00E-05 | 0.000851213 | yes |
| PRSS3     | chr9:33750463-33799229    | TTD7PVmother_uv | TTD7PV_uv | OK | 1.42536  | 0.498684 | -1.51512 | -1.60533 | 0.00345  | 0.0290342   | yes |
| PRSS35    | chr6:84222193-84235421    | TTD7PVmother_uv | TTD7PV_uv | OK | 0.64749  | 0.115643 | -2.48518 | -2.7143  | 0.00025  | 0.00340302  | yes |
| PRUNE2    | chr9:79226291-79521003    | TTD7PVmother_uv | TTD7PV_uv | OK | 7.67224  | 1.04029  | -2.88266 | -8.12055 | 5.00E-05 | 0.000851213 | yes |
| PSEN2     | chr1:227058272-227083804  | TTD7PVmother_uv | TTD7PV_uv | OK | 7.79138  | 2.98647  | -1.38344 | -3.33804 | 5.00E-05 | 0.000851213 | yes |
| PSG1      | chr19:43370612-43383871   | TTD7PVmother_uv | TTD7PV_uv | OK | 31.5547  | 1.90653  | -4.04883 | -8.91667 | 5.00E-05 | 0.000851213 | yes |
| PSG2      | chr19:43568361-43586893   | TTD7PVmother_uv | TTD7PV_uv | OK | 5.05564  | 2.39017  | -1.08078 | -2.62935 | 0.00015  | 0.00220839  | yes |
| PSG4      | chr19:43696853-43709926   | TTD7PVmother_uv | TTD7PV_uv | OK | 0.892921 | 41.7501  | 5.5471   | 11.0178  | 5.00E-05 | 0.000851213 | yes |
| PSG9      | chr19:43757434-43773682   | TTD7PVmother_uv | TTD7PV_uv | OK | 1.74567  | 0.71824  | -1.28124 | -2.36149 | 0.00105  | 0.0111179   | yes |
| PTGES     | chr9:132500614-132515344  | TTD7PVmother_uv | TTD7PV_uv | OK | 51.6261  | 25.7328  | -1.00449 | -3.82896 | 5.00E-05 | 0.000851213 | yes |
| PTGIS     | chr20:48120410-48184707   | TTD7PVmother_uv | TTD7PV_uv | OK | 87.3823  | 11.7796  | -2.89105 | -8.48314 | 5.00E-05 | 0.000851213 | yes |
| PTGS1     | chr9:125132808-125157982  | TTD7PVmother_uv | TTD7PV_uv | OK | 15.9399  | 4.73942  | -1.74986 | -5.27366 | 5.00E-05 | 0.000851213 | yes |
| PTH1R     | chr3:46919235-46945289    | TTD7PVmother_uv | TTD7PV_uv | OK | 0.834484 | 2.36713  | 1.50418  | 2.69776  | 5.00E-05 | 0.000851213 | yes |
| PTHLH     | chr12:28111016-28124916   | TTD7PVmother_uv | TTD7PV_uv | OK | 1.79924  | 0.547223 | -1.71719 | -2.42755 | 5.00E-05 | 0.000851213 | yes |
| PTPRN     | chr2:220154344-220174295  | TTD7PVmother_uv | TTD7PV_uv | OK | 7.35473  | 3.59301  | -1.03348 | -2.64044 | 5.00E-05 | 0.000851213 | yes |
| PTPRU     | chr1:29563027-29653325    | TTD7PVmother_uv | TTD7PV_uv | OK | 5.41593  | 2.50882  | -1.1102  | -3.13153 | 5.00E-05 | 0.000851213 | yes |
| PYCR1     | chr17:79890266-79894968   | TTD7PVmother_uv | TTD7PV_uv | OK | 41.6285  | 91.6175  | 1.13805  | 3.46122  | 5.00E-05 | 0.000851213 | yes |
| QPRT      | chr16:29690440-29709314   | TTD7PVmother_uv | TTD7PV_uv | OK | 20.9204  | 5.82216  | -1.84529 | -5.31321 | 5.00E-05 | 0.000851213 | yes |
| RAB20     | chr13:111175412-111214071 | TTD7PVmother_uv | TTD7PV_uv | OK | 0.600879 | 0.121979 | -2.30045 | -2.38208 | 0.00425  | 0.0341297   | yes |

|         |                          |                 |           |    |          |           |          |          |          |             |     |
|---------|--------------------------|-----------------|-----------|----|----------|-----------|----------|----------|----------|-------------|-----|
| RAB39B  | chrX:154487525-154493852 | TTD7PVmother_uv | TTD7PV_uv | OK | 0.376838 | 1.09531   | 1.53933  | 2.83485  | 5.00E-05 | 0.000851213 | yes |
| RAB3B   | chr1:52373627-52456436   | TTD7PVmother_uv | TTD7PV_uv | OK | 8.71835  | 4.10201   | -1.08772 | -3.5558  | 5.00E-05 | 0.000851213 | yes |
| RAC2    | chr22:37621309-37640305  | TTD7PVmother_uv | TTD7PV_uv | OK | 9.95782  | 4.95624   | -1.00658 | -2.86548 | 0.0001   | 0.00155758  | yes |
| RARRES2 | chr7:150035406-150038763 | TTD7PVmother_uv | TTD7PV_uv | OK | 9.62868  | 28.5835   | 1.56977  | 5.38081  | 5.00E-05 | 0.000851213 | yes |
| RASD1   | chr17:17397752-17399709  | TTD7PVmother_uv | TTD7PV_uv | OK | 10.5716  | 3.36822   | -1.65014 | -3.91745 | 5.00E-05 | 0.000851213 | yes |
| RASD2   | chr22:35937351-35950045  | TTD7PVmother_uv | TTD7PV_uv | OK | 1.58961  | 0.10636   | -3.90164 | -4.84694 | 5.00E-05 | 0.000851213 | yes |
| RASSF3  | chr12:65004292-65091347  | TTD7PVmother_uv | TTD7PV_uv | OK | 4.46483  | 1.81307   | -1.30017 | -3.29845 | 5.00E-05 | 0.000851213 | yes |
| RASSF5  | chr1:206680878-206762616 | TTD7PVmother_uv | TTD7PV_uv | OK | 1.00051  | 0.393929  | -1.34473 | -2.24449 | 0.0001   | 0.00155758  | yes |
| RASSF7  | chr11:560970-564025      | TTD7PVmother_uv | TTD7PV_uv | OK | 1.54876  | 0.613102  | -1.33692 | -1.98849 | 0.0009   | 0.0098346   | yes |
| RBM24   | chr6:17281808-17294099   | TTD7PVmother_uv | TTD7PV_uv | OK | 3.01048  | 0.985079  | -1.61168 | -3.33889 | 5.00E-05 | 0.000851213 | yes |
| RBP1    | chr3:139236275-139258671 | TTD7PVmother_uv | TTD7PV_uv | OK | 0.499643 | 1.96172   | 1.97315  | 2.17801  | 0.001    | 0.010687    | yes |
| RENBP   | chrX:153200721-153210232 | TTD7PVmother_uv | TTD7PV_uv | OK | 12.9879  | 4.10389   | -1.6621  | -4.50928 | 5.00E-05 | 0.000851213 | yes |
| RGN     | chrX:46937774-46952712   | TTD7PVmother_uv | TTD7PV_uv | OK | 1.25841  | 0.579674  | -1.11829 | -1.67379 | 0.00585  | 0.043752    | yes |
| RGS3    | chr9:116207008-116360023 | TTD7PVmother_uv | TTD7PV_uv | OK | 49.2601  | 12.4185   | -1.98793 | -5.43034 | 5.00E-05 | 0.000851213 | yes |
| RHOJ    | chr14:63671101-63760230  | TTD7PVmother_uv | TTD7PV_uv | OK | 2.81686  | 6.26424   | 1.15305  | 3.35702  | 5.00E-05 | 0.000851213 | yes |
| RILP    | chr17:1549444-1553392    | TTD7PVmother_uv | TTD7PV_uv | OK | 2.81442  | 1.4043    | -1.00299 | -2.17888 | 0.0015   | 0.0148612   | yes |
| RIMS1   | chr6:72596405-73112845   | TTD7PVmother_uv | TTD7PV_uv | OK | 1.32104  | 0.0885693 | -3.89873 | -4.68716 | 5.00E-05 | 0.000851213 | yes |
| RIPK3   | chr14:24805226-24809242  | TTD7PVmother_uv | TTD7PV_uv | OK | 8.46223  | 2.61166   | -1.69607 | -4.35694 | 5.00E-05 | 0.000851213 | yes |
| RNF144A | chr2:7052406-7184309     | TTD7PVmother_uv | TTD7PV_uv | OK | 1.11632  | 0.360666  | -1.63001 | -3.05346 | 5.00E-05 | 0.000851213 | yes |
| RNF157  | chr17:74132414-74236390  | TTD7PVmother_uv | TTD7PV_uv | OK | 0.772175 | 0.188419  | -2.03498 | -3.12586 | 5.00E-05 | 0.000851213 | yes |
| RPL22L1 | chr3:170582664-170588045 | TTD7PVmother_uv | TTD7PV_uv | OK | 15.4476  | 33.4673   | 1.11537  | 4.30624  | 5.00E-05 | 0.000851213 | yes |
| RPL36A  | chrX:100645877-100669128 | TTD7PVmother_uv | TTD7PV_uv | OK | 193.891  | 399.102   | 1.04151  | 3.15116  | 5.00E-05 | 0.000851213 | yes |
| RPP25   | chr15:75247442-75249775  | TTD7PVmother_uv | TTD7PV_uv | OK | 4.56822  | 1.40309   | -1.70303 | -4.06307 | 5.00E-05 | 0.000851213 | yes |
| RPS21   | chr20:60962120-60963576  | TTD7PVmother_uv | TTD7PV_uv | OK | 428.65   | 907.75    | 1.08249  | 11.0637  | 5.00E-05 | 0.000851213 | yes |
| RPS3    | chr11:75110534-75133345  | TTD7PVmother_uv | TTD7PV_uv | OK | 367.304  | 745.543   | 1.02132  | 3.2314   | 5.00E-05 | 0.000851213 | yes |
| RPSAP58 | chr19:23945815-24010919  | TTD7PVmother_uv | TTD7PV_uv | OK | 4.8296   | 19.0202   | 1.97756  | 5.90524  | 5.00E-05 | 0.000851213 | yes |
| RSPO3   | chr6:127440047-127518184 | TTD7PVmother_uv | TTD7PV_uv | OK | 38.0338  | 6.83344   | -2.4766  | -7.47042 | 5.00E-05 | 0.000851213 | yes |
| RTN4RL1 | chr17:1837970-1928178    | TTD7PVmother_uv | TTD7PV_uv | OK | 0.931091 | 0.419134  | -1.15151 | -1.99125 | 0.0026   | 0.0231127   | yes |
| RUNX3   | chr1:25226001-25291501   | TTD7PVmother_uv | TTD7PV_uv | OK | 1.16219  | 0.529519  | -1.13409 | -2.17077 | 0.00075  | 0.00843633  | yes |
| S1PR1   | chr1:101702304-101707076 | TTD7PVmother_uv | TTD7PV_uv | OK | 7.46128  | 15.3312   | 1.03897  | 3.38647  | 5.00E-05 | 0.000851213 | yes |
| S1PR5   | chr19:10623417-10628668  | TTD7PVmother_uv | TTD7PV_uv | OK | 0.749978 | 0.0670058 | -3.48449 | -2.86448 | 0.0006   | 0.00701778  | yes |
| SALL1   | chr16:51169885-51185183  | TTD7PVmother_uv | TTD7PV_uv | OK | 1.49753  | 0.206617  | -2.85756 | -4.94773 | 5.00E-05 | 0.000851213 | yes |
| SAMD11  | chr1:861120-894679       | TTD7PVmother_uv | TTD7PV_uv | OK | 13.1719  | 39.092    | 1.56941  | 2.33666  | 0.0036   | 0.0300762   | yes |
| SBSPON  | chr8:73976777-74005507   | TTD7PVmother_uv | TTD7PV_uv | OK | 1.13923  | 0.0696628 | -4.03153 | -5.3278  | 5.00E-05 | 0.000851213 | yes |
| SCAMP5  | chr15:75287875-75313836  | TTD7PVmother_uv | TTD7PV_uv | OK | 1.05476  | 0.445508  | -1.24339 | -2.16869 | 0.00045  | 0.00555117  | yes |
| SCG2    | chr2:224461657-224467217 | TTD7PVmother_uv | TTD7PV_uv | OK | 4.40614  | 0.884186  | -2.31709 | -5.03101 | 5.00E-05 | 0.000851213 | yes |
| SCG5    | chr15:32933869-32989298  | TTD7PVmother_uv | TTD7PV_uv | OK | 5.09024  | 1.84916   | -1.46086 | -2.6448  | 5.00E-05 | 0.000851213 | yes |

|          |                          |                 |           |    |          |           |          |          |          |             |     |
|----------|--------------------------|-----------------|-----------|----|----------|-----------|----------|----------|----------|-------------|-----|
| SCIN     | chr7:12610202-12693228   | TTD7PVmother_uv | TTD7PV_uv | OK | 5.23744  | 0.70794   | -2.88716 | -5.58343 | 5.00E-05 | 0.000851213 | yes |
| SCN9A    | chr2:167051696-167232497 | TTD7PVmother_uv | TTD7PV_uv | OK | 1.01426  | 0.0925783 | -3.45361 | -6.03664 | 5.00E-05 | 0.000851213 | yes |
| SCRG1    | chr4:174309298-174320617 | TTD7PVmother_uv | TTD7PV_uv | OK | 9.45863  | 23.8802   | 1.33611  | 4.02699  | 5.00E-05 | 0.000851213 | yes |
| SCUBE3   | chr6:35182189-35218609   | TTD7PVmother_uv | TTD7PV_uv | OK | 3.43964  | 0.187545  | -4.19695 | -7.00973 | 5.00E-05 | 0.000851213 | yes |
| SDPR     | chr2:192699031-192712006 | TTD7PVmother_uv | TTD7PV_uv | OK | 4.83351  | 1.82279   | -1.40693 | -3.5902  | 5.00E-05 | 0.000851213 | yes |
| SEC16B   | chr1:177898241-177939050 | TTD7PVmother_uv | TTD7PV_uv | OK | 0.769052 | 1.69193   | 1.13752  | 2.37553  | 5.00E-05 | 0.000851213 | yes |
| SEL1L3   | chr4:25749048-25864610   | TTD7PVmother_uv | TTD7PV_uv | OK | 6.57126  | 14.046    | 1.09592  | 2.96316  | 5.00E-05 | 0.000851213 | yes |
| SERINC2  | chr1:31882411-31907527   | TTD7PVmother_uv | TTD7PV_uv | OK | 25.9824  | 11.3836   | -1.19058 | -3.71359 | 5.00E-05 | 0.000851213 | yes |
| SERPINA3 | chr14:95078713-95090390  | TTD7PVmother_uv | TTD7PV_uv | OK | 0.864436 | 0.343941  | -1.3296  | -1.93661 | 0.00645  | 0.0469875   | yes |
| SERPINB2 | chr18:61554938-61571124  | TTD7PVmother_uv | TTD7PV_uv | OK | 27.4653  | 11.5433   | -1.25055 | -3.60532 | 5.00E-05 | 0.000851213 | yes |
| SERPINB7 | chr18:61420280-61472610  | TTD7PVmother_uv | TTD7PV_uv | OK | 5.66389  | 0.718674  | -2.97838 | -5.39076 | 5.00E-05 | 0.000851213 | yes |
| SERPINH1 | chr11:75273100-75283849  | TTD7PVmother_uv | TTD7PV_uv | OK | 383.396  | 850.69    | 1.1498   | 2.42181  | 0.0001   | 0.00155758  | yes |
| SERPINI1 | chr3:167453431-167543357 | TTD7PVmother_uv | TTD7PV_uv | OK | 2.11702  | 0.681639  | -1.63495 | -2.58476 | 0.0001   | 0.00155758  | yes |
| SEZ6L2   | chr16:29882479-29910585  | TTD7PVmother_uv | TTD7PV_uv | OK | 8.92873  | 2.23999   | -1.99496 | -4.76052 | 5.00E-05 | 0.000851213 | yes |
| SFRP4    | chr7:37945534-37956525   | TTD7PVmother_uv | TTD7PV_uv | OK | 17.2306  | 0.356144  | -5.59637 | -9.94882 | 5.00E-05 | 0.000851213 | yes |
| SGIP1    | chr1:66999824-67210768   | TTD7PVmother_uv | TTD7PV_uv | OK | 2.40402  | 0.415838  | -2.53136 | -5.14468 | 5.00E-05 | 0.000851213 | yes |
| SGK223   | chr8:8175257-8239257     | TTD7PVmother_uv | TTD7PV_uv | OK | 1.50467  | 0.227857  | -2.72325 | -4.42006 | 5.00E-05 | 0.000851213 | yes |
| SH2D5    | chr1:21046224-21059133   | TTD7PVmother_uv | TTD7PV_uv | OK | 5.55535  | 2.44549   | -1.18375 | -3.02542 | 5.00E-05 | 0.000851213 | yes |
| SH3BGR   | chr21:40817796-40887433  | TTD7PVmother_uv | TTD7PV_uv | OK | 3.60615  | 23.2489   | 2.68863  | 5.67761  | 5.00E-05 | 0.000851213 | yes |
| SH3GL3   | chr15:84116090-84287493  | TTD7PVmother_uv | TTD7PV_uv | OK | 0.102297 | 0.487601  | 2.25293  | 1.78057  | 0.00395  | 0.0322328   | yes |
| SHC2     | chr19:416582-460996      | TTD7PVmother_uv | TTD7PV_uv | OK | 2.42901  | 1.06486   | -1.1897  | -2.47842 | 0.00035  | 0.00451604  | yes |
| SHC3     | chr9:91620685-91793682   | TTD7PVmother_uv | TTD7PV_uv | OK | 0.964029 | 0.0764671 | -3.65617 | -6.17661 | 5.00E-05 | 0.000851213 | yes |
| SLC16A2  | chrX:73641327-73753764   | TTD7PVmother_uv | TTD7PV_uv | OK | 25.8696  | 11.9026   | -1.11998 | -3.8695  | 5.00E-05 | 0.000851213 | yes |
| SLC16A3  | chr17:80186281-80197375  | TTD7PVmother_uv | TTD7PV_uv | OK | 82.3181  | 26.7479   | -1.62178 | -5.24272 | 5.00E-05 | 0.000851213 | yes |
| SLC22A23 | chr6:3269206-3456793     | TTD7PVmother_uv | TTD7PV_uv | OK | 9.69175  | 4.82145   | -1.00729 | -3.21556 | 5.00E-05 | 0.000851213 | yes |
| SLC25A30 | chr13:45967453-45992516  | TTD7PVmother_uv | TTD7PV_uv | OK | 6.50197  | 3.17695   | -1.03324 | -3.11491 | 5.00E-05 | 0.000851213 | yes |
| SLC2A1   | chr1:43391045-43449029   | TTD7PVmother_uv | TTD7PV_uv | OK | 11.6781  | 5.76188   | -1.01919 | -3.22489 | 5.00E-05 | 0.000851213 | yes |
| SLC2A8   | chr9:130159416-130170170 | TTD7PVmother_uv | TTD7PV_uv | OK | 4.20991  | 1.69462   | -1.31283 | -2.75373 | 5.00E-05 | 0.000851213 | yes |
| SLC30A4  | chr15:45774679-45848928  | TTD7PVmother_uv | TTD7PV_uv | OK | 0.711549 | 0.242961  | -1.55024 | -2.5392  | 0.0003   | 0.00396402  | yes |
| SLC31A2  | chr9:115913237-115926422 | TTD7PVmother_uv | TTD7PV_uv | OK | 21.1869  | 6.02869   | -1.81325 | -5.75842 | 5.00E-05 | 0.000851213 | yes |
| SLC40A1  | chr2:190425315-190445537 | TTD7PVmother_uv | TTD7PV_uv | OK | 2.2049   | 0.67187   | -1.71446 | -3.67602 | 5.00E-05 | 0.000851213 | yes |
| SLC44A3  | chr1:95285897-95360803   | TTD7PVmother_uv | TTD7PV_uv | OK | 0.983782 | 0.336679  | -1.54697 | -2.15266 | 0.0004   | 0.00504775  | yes |
| SLC4A3   | chr2:220492291-220506702 | TTD7PVmother_uv | TTD7PV_uv | OK | 2.29453  | 0.720927  | -1.67027 | -3.3875  | 5.00E-05 | 0.000851213 | yes |
| SLC4A4   | chr4:72053002-72437804   | TTD7PVmother_uv | TTD7PV_uv | OK | 1.70441  | 0.696925  | -1.29019 | -3.09993 | 5.00E-05 | 0.000851213 | yes |
| SLC6A17  | chr1:110693131-110744823 | TTD7PVmother_uv | TTD7PV_uv | OK | 1.11746  | 0.428741  | -1.38205 | -2.81448 | 5.00E-05 | 0.000851213 | yes |
| SLC7A14  | chr3:170177341-170303863 | TTD7PVmother_uv | TTD7PV_uv | OK | 1.21103  | 0.555906  | -1.12332 | -2.72194 | 5.00E-05 | 0.000851213 | yes |
| SLCO3A1  | chr15:92396937-92715665  | TTD7PVmother_uv | TTD7PV_uv | OK | 4.12028  | 1.50712   | -1.45095 | -3.33947 | 5.00E-05 | 0.000851213 | yes |

|            |                          |                 |           |    |          |          |          |          |          |             |     |
|------------|--------------------------|-----------------|-----------|----|----------|----------|----------|----------|----------|-------------|-----|
| SNCG       | chr10:88718287-88723017  | TTD7PVmother_uv | TTD7PV_uv | OK | 1.25156  | 0.329793 | -1.92409 | -2.5959  | 0.0068   | 0.0485297   | yes |
| SOCS1      | chr16:11348273-11350039  | TTD7PVmother_uv | TTD7PV_uv | OK | 14.0986  | 6.6765   | -1.07839 | -3.65356 | 5.00E-05 | 0.000851213 | yes |
| SOCS2      | chr12:93959403-93970521  | TTD7PVmother_uv | TTD7PV_uv | OK | 6.89048  | 3.34172  | -1.04401 | -2.63143 | 5.00E-05 | 0.000851213 | yes |
| SORBS2     | chr4:186506597-186877870 | TTD7PVmother_uv | TTD7PV_uv | OK | 1.50428  | 0.288958 | -2.38014 | -3.69025 | 5.00E-05 | 0.000851213 | yes |
| SORT1      | chr1:109852187-109940563 | TTD7PVmother_uv | TTD7PV_uv | OK | 6.58631  | 1.94115  | -1.76256 | -5.17984 | 5.00E-05 | 0.000851213 | yes |
| SOX8       | chr16:1031807-1036979    | TTD7PVmother_uv | TTD7PV_uv | OK | 1.11516  | 0.286635 | -1.95997 | -3.4058  | 5.00E-05 | 0.000851213 | yes |
| SP9        | chr2:175199820-175202268 | TTD7PVmother_uv | TTD7PV_uv | OK | 6.71671  | 0.155784 | -5.43014 | -7.37116 | 5.00E-05 | 0.000851213 | yes |
| SPINT2     | chr19:38755097-38783254  | TTD7PVmother_uv | TTD7PV_uv | OK | 1.77128  | 0.650139 | -1.44597 | -2.23509 | 0.0005   | 0.00606142  | yes |
| SPON1      | chr11:13984183-14289679  | TTD7PVmother_uv | TTD7PV_uv | OK | 8.95287  | 4.36809  | -1.03535 | -3.15329 | 5.00E-05 | 0.000851213 | yes |
| SPON2      | chr4:1160720-1202750     | TTD7PVmother_uv | TTD7PV_uv | OK | 133.517  | 8.1546   | -4.03327 | -12.0052 | 5.00E-05 | 0.000851213 | yes |
| SPP1       | chr4:88896801-88904563   | TTD7PVmother_uv | TTD7PV_uv | OK | 11.4363  | 2.73412  | -2.06447 | -4.40463 | 5.00E-05 | 0.000851213 | yes |
| SPTBN4     | chr19:40973125-41082365  | TTD7PVmother_uv | TTD7PV_uv | OK | 0.726887 | 0.26707  | -1.44452 | -2.6219  | 5.00E-05 | 0.000851213 | yes |
| SQRDL      | chr15:45923345-45983492  | TTD7PVmother_uv | TTD7PV_uv | OK | 17.1842  | 8.069    | -1.09062 | -3.01077 | 5.00E-05 | 0.000851213 | yes |
| SRGN       | chr10:70847827-70864567  | TTD7PVmother_uv | TTD7PV_uv | OK | 7.07995  | 2.29251  | -1.62681 | -2.90617 | 5.00E-05 | 0.000851213 | yes |
| ST6GALNAC3 | chr1:76540388-77096669   | TTD7PVmother_uv | TTD7PV_uv | OK | 0.209915 | 3.82881  | 4.18902  | 5.09039  | 5.00E-05 | 0.000851213 | yes |
| STAG3L1    | chr7:74988428-74996914   | TTD7PVmother_uv | TTD7PV_uv | OK | 0.790324 | 0.330408 | -1.25819 | -1.97957 | 0.0039   | 0.0319486   | yes |
| STARD8     | chrX:67867510-67945684   | TTD7PVmother_uv | TTD7PV_uv | OK | 0.678343 | 0.217093 | -1.6437  | -2.45149 | 5.00E-05 | 0.000851213 | yes |
| STBD1      | chr4:77135192-77232283   | TTD7PVmother_uv | TTD7PV_uv | OK | 11.1259  | 5.12155  | -1.11927 | -3.17838 | 5.00E-05 | 0.000851213 | yes |
| STC1       | chr8:23699433-23712320   | TTD7PVmother_uv | TTD7PV_uv | OK | 6.76708  | 2.90802  | -1.21849 | -3.594   | 5.00E-05 | 0.000851213 | yes |
| STC2       | chr5:172741725-172756506 | TTD7PVmother_uv | TTD7PV_uv | OK | 180.959  | 66.2563  | -1.44953 | -3.76517 | 5.00E-05 | 0.000851213 | yes |
| STEAP1B    | chr7:22459062-22539901   | TTD7PVmother_uv | TTD7PV_uv | OK | 5.43292  | 0.415344 | -3.70935 | -5.35599 | 5.00E-05 | 0.000851213 | yes |
| STK17B     | chr2:196998306-197036336 | TTD7PVmother_uv | TTD7PV_uv | OK | 4.09257  | 1.83783  | -1.155   | -3.43443 | 5.00E-05 | 0.000851213 | yes |
| STMN2      | chr8:80523048-80578410   | TTD7PVmother_uv | TTD7PV_uv | OK | 174.996  | 5.54987  | -4.97873 | -12.486  | 5.00E-05 | 0.000851213 | yes |
| STX1B      | chr16:31000576-31021829  | TTD7PVmother_uv | TTD7PV_uv | OK | 0.795765 | 0.325514 | -1.28962 | -2.19851 | 0.00025  | 0.00340302  | yes |
| STXBP2     | chr19:7701986-7712760    | TTD7PVmother_uv | TTD7PV_uv | OK | 2.15016  | 0.347345 | -2.63001 | -3.49952 | 5.00E-05 | 0.000851213 | yes |
| STXBP6     | chr14:25281305-25519095  | TTD7PVmother_uv | TTD7PV_uv | OK | 1.98357  | 5.60064  | 1.49749  | 3.78225  | 5.00E-05 | 0.000851213 | yes |
| SUSD5      | chr3:33191536-33260707   | TTD7PVmother_uv | TTD7PV_uv | OK | 1.25084  | 0.306832 | -2.02738 | -3.88352 | 5.00E-05 | 0.000851213 | yes |
| SVEP1      | chr9:113127528-113342160 | TTD7PVmother_uv | TTD7PV_uv | OK | 19.5241  | 6.04711  | -1.69094 | -5.2387  | 5.00E-05 | 0.000851213 | yes |
| SYBU       | chr8:110586404-110704020 | TTD7PVmother_uv | TTD7PV_uv | OK | 3.89742  | 9.50826  | 1.28666  | 3.28107  | 5.00E-05 | 0.000851213 | yes |
| SYNPO2     | chr4:119809995-119982402 | TTD7PVmother_uv | TTD7PV_uv | OK | 26.526   | 2.06269  | -3.68481 | -10.1705 | 5.00E-05 | 0.000851213 | yes |
| SYT14      | chr1:210111518-210337633 | TTD7PVmother_uv | TTD7PV_uv | OK | 1.85175  | 4.48476  | 1.27614  | 3.43018  | 5.00E-05 | 0.000851213 | yes |
| SYT7       | chr11:61281187-61348344  | TTD7PVmother_uv | TTD7PV_uv | OK | 0.354221 | 0.845157 | 1.25457  | 2.202    | 0.0005   | 0.00606142  | yes |
| TACSTD2    | chr1:59041094-59043166   | TTD7PVmother_uv | TTD7PV_uv | OK | 0.737819 | 2.28705  | 1.63215  | 3.36292  | 5.00E-05 | 0.000851213 | yes |
| TBX1       | chr22:19744225-19771112  | TTD7PVmother_uv | TTD7PV_uv | OK | 8.11116  | 0.77913  | -3.37997 | -6.68286 | 5.00E-05 | 0.000851213 | yes |
| TBXA2R     | chr19:3594503-3606831    | TTD7PVmother_uv | TTD7PV_uv | OK | 1.7058   | 0.789379 | -1.11165 | -2.05421 | 0.00165  | 0.01607     | yes |
| TCEAL7     | chrX:102585113-102587251 | TTD7PVmother_uv | TTD7PV_uv | OK | 10.2617  | 4.78425  | -1.1009  | -3.26419 | 5.00E-05 | 0.000851213 | yes |
| TCF21      | chr6:134210258-134216675 | TTD7PVmother_uv | TTD7PV_uv | OK | 0.39838  | 3.06708  | 2.94465  | 3.77373  | 5.00E-05 | 0.000851213 | yes |

|            |                           |                 |           |    |           |          |          |          |          |             |     |
|------------|---------------------------|-----------------|-----------|----|-----------|----------|----------|----------|----------|-------------|-----|
| TCTEX1D1   | chr1:67218139-67244730    | TTD7PVmother_uv | TTD7PV_uv | OK | 1.03845   | 0.337154 | -1.62295 | -2.97597 | 0.00045  | 0.00555117  | yes |
| TEKT4P2    | chr21:9907188-9968593     | TTD7PVmother_uv | TTD7PV_uv | OK | 27.3899   | 7.58449  | -1.85252 | -4.46348 | 5.00E-05 | 0.000851213 | yes |
| TFAP2A     | chr6:10396915-10419797    | TTD7PVmother_uv | TTD7PV_uv | OK | 0.871365  | 0.193227 | -2.17298 | -3.27309 | 5.00E-05 | 0.000851213 | yes |
| TFAP2C     | chr20:55204357-55214338   | TTD7PVmother_uv | TTD7PV_uv | OK | 2.39262   | 1.15833  | -1.04654 | -2.38268 | 0.0004   | 0.00504775  | yes |
| TFPI2      | chr7:93514708-93520303    | TTD7PVmother_uv | TTD7PV_uv | OK | 91.8712   | 28.209   | -1.70346 | -5.57213 | 5.00E-05 | 0.000851213 | yes |
| TGM2       | chr20:36756863-36793700   | TTD7PVmother_uv | TTD7PV_uv | OK | 36.2105   | 5.88452  | -2.62141 | -7.0526  | 5.00E-05 | 0.000851213 | yes |
| THBS1      | chr15:39873279-39889668   | TTD7PVmother_uv | TTD7PV_uv | OK | 824.766   | 212.738  | -1.95491 | -2.43799 | 0.00055  | 0.00656053  | yes |
| THBS2      | chr6:169615874-169654137  | TTD7PVmother_uv | TTD7PV_uv | OK | 165.257   | 66.8458  | -1.3058  | -3.44282 | 5.00E-05 | 0.000851213 | yes |
| TIPARP     | chr3:156390959-156424557  | TTD7PVmother_uv | TTD7PV_uv | OK | 7.17373   | 2.60767  | -1.45996 | -3.82841 | 5.00E-05 | 0.000851213 | yes |
| TJP2       | chr9:71736179-71870124    | TTD7PVmother_uv | TTD7PV_uv | OK | 1.64032   | 3.45307  | 1.0739   | 2.46542  | 5.00E-05 | 0.000851213 | yes |
| TK1        | chr17:76170159-76183285   | TTD7PVmother_uv | TTD7PV_uv | OK | 24.2224   | 54.3861  | 1.16689  | 4.33076  | 5.00E-05 | 0.000851213 | yes |
| TLR4       | chr9:120466452-120479769  | TTD7PVmother_uv | TTD7PV_uv | OK | 1.28898   | 0.196635 | -2.71264 | -4.7899  | 5.00E-05 | 0.000851213 | yes |
| TM4SF1     | chr3:149086804-149095568  | TTD7PVmother_uv | TTD7PV_uv | OK | 16.4784   | 2.75044  | -2.58284 | -7.52549 | 5.00E-05 | 0.000851213 | yes |
| TMEM155    | chr4:122680084-122687963  | TTD7PVmother_uv | TTD7PV_uv | OK | 3.16926   | 7.5139   | 1.24542  | 3.30385  | 5.00E-05 | 0.000851213 | yes |
| TMEM229B   | chr14:67936982-67982021   | TTD7PVmother_uv | TTD7PV_uv | OK | 0.579915  | 0.216362 | -1.42239 | -2.30176 | 0.0013   | 0.0132326   | yes |
| TMEM255B   | chr13:114462215-114514899 | TTD7PVmother_uv | TTD7PV_uv | OK | 9.49521   | 2.17111  | -2.12877 | -5.41087 | 5.00E-05 | 0.000851213 | yes |
| TMEM59L    | chr19:18723681-18731849   | TTD7PVmother_uv | TTD7PV_uv | OK | 3.66084   | 0.612604 | -2.57915 | -4.82812 | 5.00E-05 | 0.000851213 | yes |
| TMEM9B-AS1 | chr11:8986221-8997830     | TTD7PVmother_uv | TTD7PV_uv | OK | 1.6279    | 3.54368  | 1.12223  | 2.53084  | 0.0017   | 0.0164429   | yes |
| TMTC1      | chr12:29653745-29937692   | TTD7PVmother_uv | TTD7PV_uv | OK | 12.8491   | 4.40223  | -1.54536 | -4.48524 | 5.00E-05 | 0.000851213 | yes |
| TNFAIP6    | chr2:152214105-152236562  | TTD7PVmother_uv | TTD7PV_uv | OK | 6.93819   | 19.2101  | 1.46923  | 3.74679  | 5.00E-05 | 0.000851213 | yes |
| TNFRSF10C  | chr8:22941867-22974950    | TTD7PVmother_uv | TTD7PV_uv | OK | 2.00844   | 5.3491   | 1.41322  | 2.51403  | 0.00025  | 0.00340302  | yes |
| TNFRSF14   | chr1:2487207-2495267      | TTD7PVmother_uv | TTD7PV_uv | OK | 8.08615   | 3.01     | -1.42569 | -3.13123 | 5.00E-05 | 0.000851213 | yes |
| TNFRSF1B   | chr1:12227059-12269277    | TTD7PVmother_uv | TTD7PV_uv | OK | 0.801404  | 0.373261 | -1.10235 | -1.74463 | 0.00185  | 0.0176238   | yes |
| TNFRSF21   | chr6:47199267-47277680    | TTD7PVmother_uv | TTD7PV_uv | OK | 8.95711   | 2.93264  | -1.61083 | -4.85876 | 5.00E-05 | 0.000851213 | yes |
| TNFSF4     | chr1:173152869-173176471  | TTD7PVmother_uv | TTD7PV_uv | OK | 1.02855   | 0.309998 | -1.73029 | -3.16317 | 0.0001   | 0.00155758  | yes |
| TOX        | chr8:59717976-60031767    | TTD7PVmother_uv | TTD7PV_uv | OK | 0.0871603 | 2.30388  | 4.72425  | 6.76458  | 5.00E-05 | 0.000851213 | yes |
| TP53I11    | chr11:44785975-44972857   | TTD7PVmother_uv | TTD7PV_uv | OK | 15.5976   | 6.28546  | -1.31123 | -2.09945 | 0.0003   | 0.00396402  | yes |
| TPD52      | chr8:80947104-81083836    | TTD7PVmother_uv | TTD7PV_uv | OK | 0.0479056 | 1.12175  | 4.54941  | 4.21556  | 5.00E-05 | 0.000851213 | yes |
| TPTEP1     | chr22:17082800-17129720   | TTD7PVmother_uv | TTD7PV_uv | OK | 2.62332   | 0.095366 | -4.78178 | -5.04808 | 0.0019   | 0.0180051   | yes |
| TRAM1L1    | chr4:118004709-118006736  | TTD7PVmother_uv | TTD7PV_uv | OK | 0.824649  | 1.78112  | 1.11093  | 2.28547  | 0.0014   | 0.0141027   | yes |
| TRH        | chr3:129693113-129696779  | TTD7PVmother_uv | TTD7PV_uv | OK | 0.601837  | 0.220847 | -1.44633 | -1.95358 | 0.0059   | 0.0439957   | yes |
| TRIB2      | chr2:12856997-12882858    | TTD7PVmother_uv | TTD7PV_uv | OK | 3.19473   | 1.59685  | -1.00046 | -2.51324 | 5.00E-05 | 0.000851213 | yes |
| TRIM47     | chr17:73870244-73874656   | TTD7PVmother_uv | TTD7PV_uv | OK | 6.30672   | 2.69884  | -1.22455 | -3.13248 | 5.00E-05 | 0.000851213 | yes |
| TRPC3      | chr4:122800182-122872909  | TTD7PVmother_uv | TTD7PV_uv | OK | 0.125397  | 0.529149 | 2.07717  | 2.68301  | 0.0002   | 0.00284504  | yes |
| TRPV2      | chr17:16318855-16340317   | TTD7PVmother_uv | TTD7PV_uv | OK | 6.00278   | 0.618205 | -3.27947 | -6.99936 | 5.00E-05 | 0.000851213 | yes |
| TSPAN10    | chr17:79609348-79615779   | TTD7PVmother_uv | TTD7PV_uv | OK | 3.74042   | 1.66032  | -1.17173 | -2.67665 | 0.0003   | 0.00396402  | yes |
| TSPAN13    | chr7:16793350-16824161    | TTD7PVmother_uv | TTD7PV_uv | OK | 6.51739   | 2.08158  | -1.64662 | -4.40554 | 5.00E-05 | 0.000851213 | yes |

|         |                           |                 |           |    |           |          |          |          |          |             |     |
|---------|---------------------------|-----------------|-----------|----|-----------|----------|----------|----------|----------|-------------|-----|
| TSPAN2  | chr1:115590632-115632121  | TTD7PVmother_uv | TTD7PV_uv | OK | 1.07229   | 0.394151 | -1.44388 | -2.65257 | 0.00055  | 0.00656053  | yes |
| TSPAN8  | chr12:71518876-71551779   | TTD7PVmother_uv | TTD7PV_uv | OK | 0.235127  | 2.58373  | 3.45794  | 5.21399  | 0.00015  | 0.00220839  | yes |
| TTC12   | chr11:113185250-113237114 | TTD7PVmother_uv | TTD7PV_uv | OK | 0.280189  | 2.24968  | 3.00525  | 4.80616  | 5.00E-05 | 0.000851213 | yes |
| TUBE1   | chr6:112391859-112423993  | TTD7PVmother_uv | TTD7PV_uv | OK | 4.68635   | 9.97822  | 1.09032  | 2.65284  | 0.0001   | 0.00155758  | yes |
| TXNIP   | chr1:145438461-145442628  | TTD7PVmother_uv | TTD7PV_uv | OK | 29.3299   | 14.1969  | -1.04679 | -3.56551 | 5.00E-05 | 0.000851213 | yes |
| TYW1B   | chr7:72023728-72298813    | TTD7PVmother_uv | TTD7PV_uv | OK | 0.243853  | 0.863382 | 1.82399  | 2.51951  | 5.00E-05 | 0.000851213 | yes |
| UCHL1   | chr4:41258897-41270446    | TTD7PVmother_uv | TTD7PV_uv | OK | 187.187   | 453.132  | 1.27545  | 4.96454  | 5.00E-05 | 0.000851213 | yes |
| ULBP1   | chr6:150285142-150294846  | TTD7PVmother_uv | TTD7PV_uv | OK | 4.24618   | 12.4271  | 1.54925  | 4.28561  | 5.00E-05 | 0.000851213 | yes |
| USP32P1 | chr17:16690205-16707819   | TTD7PVmother_uv | TTD7PV_uv | OK | 0.232618  | 0.587423 | 1.33644  | 2.19379  | 0.00125  | 0.012827    | yes |
| USP53   | chr4:120133781-120216673  | TTD7PVmother_uv | TTD7PV_uv | OK | 12.7879   | 5.818    | -1.13619 | -3.79589 | 5.00E-05 | 0.000851213 | yes |
| VAX2    | chr2:71127719-71160575    | TTD7PVmother_uv | TTD7PV_uv | OK | 1.29057   | 0.432335 | -1.57778 | -2.47508 | 0.00235  | 0.0214025   | yes |
| VIT     | chr2:36923832-37041937    | TTD7PVmother_uv | TTD7PV_uv | OK | 5.38592   | 0.614685 | -3.13127 | -5.21107 | 5.00E-05 | 0.000851213 | yes |
| WARS    | chr14:100800124-100842680 | TTD7PVmother_uv | TTD7PV_uv | OK | 84.3934   | 181.118  | 1.10173  | 3.02216  | 5.00E-05 | 0.000851213 | yes |
| WISP1   | chr8:134203281-134243932  | TTD7PVmother_uv | TTD7PV_uv | OK | 16.0917   | 33.6221  | 1.06309  | 3.25091  | 5.00E-05 | 0.000851213 | yes |
| WISP2   | chr20:43343884-43356452   | TTD7PVmother_uv | TTD7PV_uv | OK | 342.622   | 24.8015  | -3.78812 | -12.3148 | 5.00E-05 | 0.000851213 | yes |
| WNK4    | chr17:40932648-40949084   | TTD7PVmother_uv | TTD7PV_uv | OK | 3.52072   | 0.371605 | -3.24403 | -5.62613 | 5.00E-05 | 0.000851213 | yes |
| WNT4    | chr1:22443797-22469519    | TTD7PVmother_uv | TTD7PV_uv | OK | 1.75558   | 0.351435 | -2.32062 | -4.12563 | 5.00E-05 | 0.000851213 | yes |
| WNT5B   | chr12:1726221-1756378     | TTD7PVmother_uv | TTD7PV_uv | OK | 59.5437   | 20.0705  | -1.56887 | -4.7728  | 5.00E-05 | 0.000851213 | yes |
| XG      | chrX:2670092-2734541      | TTD7PVmother_uv | TTD7PV_uv | OK | 23.8368   | 9.7839   | -1.28471 | -4.4833  | 5.00E-05 | 0.000851213 | yes |
| XPNPEP2 | chrX:128872945-128903525  | TTD7PVmother_uv | TTD7PV_uv | OK | 1.80795   | 9.31901  | 2.36583  | 5.98715  | 5.00E-05 | 0.000851213 | yes |
| ZFPM2   | chr8:106331146-106816767  | TTD7PVmother_uv | TTD7PV_uv | OK | 2.82198   | 0.335572 | -3.07201 | -5.93202 | 5.00E-05 | 0.000851213 | yes |
| ZIC1    | chr3:147127180-147134506  | TTD7PVmother_uv | TTD7PV_uv | OK | 0.0248948 | 1.62526  | 6.02868  | 5.53306  | 0.0026   | 0.0231127   | yes |
| ZIC4    | chr3:147103834-147124596  | TTD7PVmother_uv | TTD7PV_uv | OK | 0.044573  | 1.19038  | 4.7391   | 3.261    | 5.00E-05 | 0.000851213 | yes |
| ZKSCAN4 | chr6:28212489-28220002    | TTD7PVmother_uv | TTD7PV_uv | OK | 0.92999   | 0.428688 | -1.11729 | -1.85501 | 0.00385  | 0.03158     | yes |
| ZNF391  | chr6:27356523-27369227    | TTD7PVmother_uv | TTD7PV_uv | OK | 0.899711  | 0.310847 | -1.53326 | -2.34744 | 0.00235  | 0.0214025   | yes |
| ZNF613  | chr19:52430687-52449011   | TTD7PVmother_uv | TTD7PV_uv | OK | 0.615856  | 0.249372 | -1.30429 | -1.66945 | 0.0032   | 0.0272756   | yes |
| ZNF702P | chr19:53471503-53496784   | TTD7PVmother_uv | TTD7PV_uv | OK | 0.821376  | 0.132092 | -2.6365  | -3.7365  | 5.00E-05 | 0.000851213 | yes |
| ZNF711  | chrX:84498996-84528368    | TTD7PVmother_uv | TTD7PV_uv | OK | 0.292279  | 0.704023 | 1.26828  | 2.06412  | 0.0009   | 0.0098346   | yes |
| ZNF804A | chr2:185463092-185804214  | TTD7PVmother_uv | TTD7PV_uv | OK | 0.109194  | 0.689756 | 2.65919  | 3.90123  | 5.00E-05 | 0.000851213 | yes |

**Table S6.** List of the 174 deregulated genes and the 3 reference genes analyzed by RealTime Ready Custom Panels in the RNA pools from primary dermal fibroblasts of 4 TTD/XP-D patients (TTD pool) and 4 healthy TTD parents (control pool).

| Gene Symbol     | Gene Description                                                                    | Source: HGNC Symbol; Acc |
|-----------------|-------------------------------------------------------------------------------------|--------------------------|
| <i>ACOT1</i>    | acyl-CoA thioesterase 1                                                             | 41                       |
| <i>ADM</i>      | myeloid-associated differentiation marker                                           | 359                      |
| <i>ADRA2A</i>   | adrenergic, alpha-2A- receptor                                                      | 281                      |
| <i>AHR</i>      | aryl hydrocarbon receptor                                                           | 348                      |
| <i>AKAP2</i>    | A kinase (PRKA) anchor protein 2                                                    | 372                      |
| <i>AKR1C2</i>   | aldo-keto reductase family 1, member C2 (dihydrodiol dehydrogenase 2)               | 385                      |
| <i>ALDH1A3</i>  | aldehyde dehydrogenase 1 family, member A3                                          | 409                      |
| <i>ALDH1B1</i>  | aldehyde dehydrogenase 1 family, member B1                                          | 407                      |
| <i>ALDH3B1</i>  | aldehyde dehydrogenase 3 family, member B1                                          | 410                      |
| <i>ANGPTL4</i>  | angiopoietin-like 4                                                                 | 16039                    |
| <i>ANP32A</i>   | acidic (leucine-rich) nuclear phosphoprotein 32 family, member A                    | 13233                    |
| <i>ANTXR1</i>   | anthrax toxin receptor 1                                                            | 21014                    |
| <i>AP1S2</i>    | adaptor-related protein complex 1, sigma 2 subunit                                  | 560                      |
| <i>APBB1IP</i>  | amyloid beta (A4) precursor protein-binding, family B, member 1 interacting protein | 17379                    |
| <i>ARHGAP23</i> | Rho GTPase activating protein 23                                                    | 29293                    |
| <i>ASS1</i>     | argininosuccinate synthase 1                                                        | 758                      |
| <i>ATF5</i>     | activating transcription factor 5                                                   | 790                      |
| <i>ATP13A3</i>  | ATPase type 13A3                                                                    | 24113                    |
| <i>C15orf39</i> | Uncharacterized protein C15orf39                                                    | -                        |
| <i>C1orf198</i> | Uncharacterized protein C1orf198                                                    | -                        |
| <i>C8orf58</i>  | Uncharacterized protein C8orf58                                                     | -                        |
| <i>CABLES1</i>  | Cdk5 and Abl enzyme substrate 1                                                     | 25097                    |
| <i>CAMK2N1</i>  | calcium/calmodulin-dependent protein kinase II inhibitor 1                          | 24190                    |
| <i>CCDC8</i>    | coiled-coil domain containing 8                                                     | 25367                    |
| <i>CCRL1</i>    | chemokine (C-C motif) receptor-like 1                                               | 1611                     |
| <i>CLEC3B</i>   | C-type lectin domain family 3, member B                                             | 11891                    |
| <i>CLGN</i>     | calmegin                                                                            | 2060                     |
| <i>CLIC3</i>    | chloride intracellular channel 3                                                    | 2064                     |
| <i>CLU</i>      | clusterin                                                                           | 2095                     |
| <i>CNN1</i>     | calponin 1, basic, smooth muscle                                                    | 2155                     |
| <i>COL4A1</i>   | collagen, type IV, alpha 1                                                          | 2202                     |
| <i>CRABP2</i>   | cellular retinoic acid binding protein 2                                            | 2339                     |
| <i>CRLF1</i>    | cytokine receptor-like factor 1                                                     | 2364                     |
| <i>CRYAB</i>    | crystallin, alpha B                                                                 | 2389                     |
| <i>CRYZ</i>     | crystallin, zeta (quinone reductase)                                                | 2419                     |
| <i>CSRP2</i>    | cysteine and glycine-rich protein 2                                                 | 2470                     |
| <i>CTGF</i>     | connective tissue growth factor                                                     | 2500                     |
| <i>CTSC</i>     | cathepsin C                                                                         | 2528                     |
| <i>CTSK</i>     | cathepsin K                                                                         | 2536                     |
| <i>CYR61</i>    | cysteine-rich, angiogenic inducer, 61                                               | 2654                     |
| <i>DCAF4</i>    | DDB1 and CUL4 associated factor 4                                                   | 20229                    |
| <i>DDIT3</i>    | DNA-damage-inducible transcript 3                                                   | 2726                     |
| <i>DDIT4</i>    | DNA-damage-inducible transcript 4                                                   | 24944                    |
| <i>DNAJB1</i>   | DnaJ (Hsp40) homolog, subfamily B, member 1                                         | 5270                     |
| <i>DPP4</i>     | dipeptidyl-peptidase 4                                                              | 3009                     |
| <i>DSP</i>      | desmoplakin                                                                         | 3052                     |
| <i>DUSP1</i>    | dual specificity phosphatase 1                                                      | 3064                     |
| <i>EGR1</i>     | early growth response 1                                                             | 3238                     |
| <i>EIF4EBP1</i> | eukaryotic translation initiation factor 4E binding protein 1                       | 3288                     |
| <i>EPDR1</i>    | ependymin related protein 1                                                         | 17572                    |
| <i>EPS8L2</i>   | EPS8-like 2                                                                         | 21296                    |
| <i>F2R</i>      | coagulation factor II (thrombin) receptor                                           | 3537                     |
| <i>FAM118A</i>  | family with sequence similarity 118, member A                                       | 1313                     |
| <i>FAM43A</i>   | family with sequence similarity 43, member A                                        | 26888                    |



| <b>Gene Symbol</b> | <b>Gene Description</b>                                                                                            | <b>Source: HGNC Symbol; Acc</b> |
|--------------------|--------------------------------------------------------------------------------------------------------------------|---------------------------------|
| <i>FBXO32</i>      | F-box protein 32                                                                                                   | 16731                           |
| <i>FGF7</i>        | fibroblast growth factor 7                                                                                         | 3685                            |
| <i>FNDC4</i>       | fibronectin type III domain containing 4                                                                           | 20239                           |
| <i>FOSB</i>        | FBJ murine osteosarcoma viral oncogene homolog B                                                                   | 3797                            |
| <i>FOXO3</i>       | forkhead box O3                                                                                                    | 3821                            |
| <i>GADD45A</i>     | growth arrest and DNA-damage-inducible, alpha                                                                      | 4095                            |
| <i>GADD45B</i>     | growth arrest and DNA-damage-inducible, beta                                                                       | 4096                            |
| <i>GALNTL2</i>     | UDP-N-acetyl-alpha-D-galactosamine:polypeptide N-acetylgalactosaminyltransferase-like 2                            | 21531                           |
| <i>GAS1</i>        | growth arrest-specific 1                                                                                           | 4165                            |
| <i>GAS5</i>        | small nucleolar RNA, C/D box 44                                                                                    | 10183                           |
| <i>GAS6</i>        | growth arrest-specific 6                                                                                           | 4168                            |
| <i>GDF15</i>       | growth differentiation factor 15                                                                                   | 30142                           |
| <i>GDF6</i>        | growth differentiation factor 6                                                                                    | 4221                            |
| <i>GLRX</i>        | glutaredoxin (thioltransferase)                                                                                    | 4330                            |
| <i>GNG11</i>       | guanine nucleotide binding protein (G protein), gamma 11                                                           | 4403                            |
| <i>GYPC</i>        | glycophorin C (Gerbich blood group)                                                                                | 4704                            |
| <i>HAND2</i>       | heart and neural crest derivatives expressed 2                                                                     | 4808                            |
| <i>HAPLN3</i>      | hyaluronan and proteoglycan link protein 3                                                                         | 21446                           |
| <i>HERPUD1</i>     | homocysteine-inducible, endoplasmic reticulum stress-inducible, ubiquitin-like domain member 1                     | 13744                           |
| <i>HIST2H2BE</i>   | histone cluster 2, H2be                                                                                            | 4760                            |
| <i>HMOX1</i>       | heme oxygenase (decycling) 1                                                                                       | 5013                            |
| <i>HNRNPA1</i>     | heterogeneous nuclear ribonucleoprotein A1                                                                         | 5031                            |
| <i>HOXB7</i>       | homeobox B7                                                                                                        | 5118                            |
| <i>HOXC10</i>      | homeobox C10                                                                                                       | 5122                            |
| <i>HOXC9</i>       | homeobox C9                                                                                                        | 5130                            |
| <i>HSD3B7</i>      | hydroxy-delta-5-steroid dehydrogenase, 3 beta- and steroid delta-isomerase 7                                       | 18324                           |
| <i>HSPA2</i>       | heat shock 70kDa protein 2                                                                                         | 5235                            |
| <i>HSPB7</i>       | heat shock 27kDa protein family, member 7                                                                          | 5249                            |
| <i>ID1</i>         | inhibitor of DNA binding 1, dominant negative helix-loop-helix protein                                             | 5360                            |
| <i>ID3</i>         | inhibitor of DNA binding 3, dominant negative helix-loop-helix protein                                             | 5362                            |
| <i>IER3</i>        | Radiation-inducible immediate-early gene IEX-1 (Immediate early protein GLY96)(Immediate early response 3 protein) | P46695                          |
| <i>IGFBP4</i>      | insulin-like growth factor binding protein 4                                                                       | 5473                            |
| <i>IL13RA2</i>     | interleukin 13 receptor, alpha 2                                                                                   | 5975                            |
| <i>IL20RB</i>      | interleukin 20 receptor beta                                                                                       | 6004                            |
| <i>IL6</i>         | interleukin 6 (interferon, beta 2)                                                                                 | 6018                            |
| <i>IRF2BP2</i>     | interferon regulatory factor 2 binding protein 2                                                                   | 21729                           |
| <i>IRS2</i>        | insulin receptor substrate 2                                                                                       | 6126                            |
| <i>JUN</i>         | jun proto-oncogene                                                                                                 | 6204                            |
| <i>JUND</i>        | jun D proto-oncogene                                                                                               | 6206                            |
| <i>KCNE4</i>       | potassium voltage-gated channel, Isk-related family, member 4                                                      | 6244                            |
| <i>KRT34</i>       | keratin 34                                                                                                         | 6452                            |
| <i>KRTAP1-5</i>    | keratin associated protein 1-5                                                                                     | 16777                           |
| <i>LBH</i>         | limb bud and heart development homolog (mouse)                                                                     | 29532                           |
| <i>LDOC1</i>       | leucine zipper, down-regulated in cancer 1                                                                         | 6548                            |
| <i>LGALS3BP</i>    | lectin, galactoside-binding, soluble, 3 binding protein                                                            | 6564                            |
| <i>LGR4</i>        | leucine-rich repeat-containing G protein-coupled receptor 4                                                        | 13299                           |
| <i>LIF</i>         | leukemia inhibitory factor (cholinergic differentiation factor)                                                    | 6596                            |
| <i>LMCD1</i>       | LIM and cysteine-rich domains 1                                                                                    | 6633                            |
| <i>LMO7</i>        | LIM domain 7                                                                                                       | 6646                            |
| <i>LRRC15</i>      | leucine rich repeat containing 15                                                                                  | 20818                           |
| <i>MFAP5</i>       | microfibrillar associated protein 5                                                                                | 29673                           |
| <i>MIDN</i>        | midnolin                                                                                                           | 16298                           |
| <i>MMP1</i>        | matrix metalloproteinase 1 (interstitial collagenase)                                                              | 7155                            |
| <i>MMS19</i>       | MMS19 nucleotide excision repair homolog ( <i>S. cerevisiae</i> )                                                  | 13824                           |
| <i>MOXD1</i>       | monooxygenase, DBH-like 1                                                                                          | 21063                           |

| <b>Gene Symbol</b> | <b>Gene Description</b>                                                                             | <b>Source: HGNC Symbol; Acc</b> |
|--------------------|-----------------------------------------------------------------------------------------------------|---------------------------------|
| <i>MT1E</i>        | metallothionein 1L (gene/pseudogene)                                                                | 7404                            |
| <i>MT2A</i>        | metallothionein 2A                                                                                  | 7406                            |
| <i>MUC1</i>        | mucin 1, cell surface associated                                                                    | 7508                            |
| <i>MYADM</i>       | myeloid-associated differentiation marker                                                           | 7544                            |
| <i>MYC</i>         | v-myc myelocytomatosis viral oncogene homolog (avian)                                               | 7553                            |
| <i>MYL9</i>        | myosin, light chain 9, regulatory                                                                   | 15754                           |
| <i>MYLK</i>        | myosin light chain kinase                                                                           | 7590                            |
| <i>NBL1</i>        | neuroblastoma, suppression of tumorigenicity 1                                                      | 7650                            |
| <i>NQO1</i>        | NAD(P)H dehydrogenase, quinone 1                                                                    | 2874                            |
| <i>PAM</i>         | peptidylglycine alpha-amidating monooxygenase                                                       | 8596                            |
| <i>PCDH10</i>      | protocadherin 10                                                                                    | 13404                           |
| <i>PHGDH</i>       | phosphoglycerate dehydrogenase                                                                      | 8923                            |
| <i>PIK3IP1</i>     | phosphoinositide-3-kinase interacting protein 1                                                     | 24942                           |
| <i>PLEKHO2</i>     | pleckstrin homology domain containing, family O member 2                                            | 30026                           |
| <i>PLXNB1</i>      | plexin B1                                                                                           | 9103                            |
| <i>PMP22</i>       | peripheral myelin protein 22                                                                        | 9118                            |
| <i>POSTN</i>       | periostin, osteoblast specific factor                                                               | 16953                           |
| <i>PPP1R3C</i>     | protein phosphatase 1, regulatory (inhibitor) subunit 3C                                            | 9293                            |
| <i>PRSS23</i>      | Serine protease 23 Precursor (EC 3.4.21.-)(Putative secreted protein Zsig13)                        | 560                             |
| <i>PSG1</i>        | pregnancy specific beta-1-glycoprotein 1                                                            | 9514                            |
| <i>PSG4</i>        | pregnancy specific beta-1-glycoprotein 4                                                            | 9521                            |
| <i>PTGES</i>       | prostaglandin E synthase                                                                            | 9599                            |
| <i>PTGIS</i>       | prostaglandin I2 (prostacyclin) synthase                                                            | 9603                            |
| <i>PTGS1</i>       | prostaglandin-endoperoxide synthase 1 (prostaglandin G/H synthase and cyclooxygenase)               | 9604                            |
| <i>QPCT</i>        | glutamyl-peptide cyclotransferase                                                                   | 9753                            |
| <i>RAB3B</i>       | RAB3B, member RAS oncogene family                                                                   | 9778                            |
| <i>RPL22L1</i>     | ribosomal protein L22-like 1                                                                        | 27610                           |
| <i>RPL36A</i>      | ribosomal protein L36a                                                                              | 135255                          |
| <i>RPS21</i>       | ribosomal protein S21                                                                               | 10409                           |
| <i>RPS3</i>        | ribosomal protein S3                                                                                | 10420                           |
| <i>RSPO3</i>       | R-spondin 3 homolog ( <i>Xenopus laevis</i> )                                                       | 20866                           |
| <i>SERINC2</i>     | serine incorporator 2                                                                               | 23231                           |
| <i>SERPINH1</i>    | serpin peptidase inhibitor, clade H (heat shock protein 47), member 1, (collagen binding protein 1) | 1546                            |
| <i>SFRP4</i>       | secreted frizzled-related protein 4                                                                 | 10778                           |
| <i>SGK1</i>        | serum/glucocorticoid regulated kinase 1                                                             | 10810                           |
| <i>SH3BGR</i>      | SH3 domain binding glutamic acid-rich protein                                                       | 10822                           |
| <i>SLC16A3</i>     | solute carrier family 16, member 3 (monocarboxylic acid transporter 4)                              | 10924                           |
| <i>SLC2A1</i>      | solute carrier family 2 (facilitated glucose transporter), member 1                                 | 11005                           |
| <i>SMAD7</i>       | SMAD family member 7                                                                                | 6773                            |
| <i>SOCS1</i>       | suppressor of cytokine signaling 1                                                                  | 19383                           |
| <i>SPON2</i>       | spondin 2, extracellular matrix protein                                                             | 11253                           |
| <i>STBD1</i>       | starch binding domain 1                                                                             | 24854                           |
| <i>STC2</i>        | stanniocalcin 2                                                                                     | 11374                           |
| <i>STMN2</i>       | stathmin-like 2                                                                                     | 10577                           |
| <i>SYNPO2</i>      | synaptopodin 2                                                                                      | 17732                           |
| <i>TBX1</i>        | T-box 1                                                                                             | 11592                           |
| <i>TFPI2</i>       | "tissue factor pathway inhibitor 2                                                                  | 11761                           |
| <i>TGM2</i>        | transglutaminase 2 (C polypeptide, protein-glutamine-gamma-glutamyltransferase)                     | 11778                           |
| <i>THBS1</i>       | thrombospondin 1                                                                                    | 11785                           |
| <i>THBS2</i>       | thrombospondin 2                                                                                    | 11786                           |
| <i>TM4SF1</i>      | transmembrane 4 L six family member 1                                                               | 11853                           |
| <i>TNFRSF12A</i>   | tumor necrosis factor receptor superfamily, member 12A                                              | 18152                           |
| <i>TOB1</i>        | transducer of ERBB2, 1                                                                              | 11979                           |
| <i>TSC22D3</i>     | TSC22 domain family, member 3                                                                       | 3051                            |
| <i>UCHL1</i>       | ubiquitin carboxyl-terminal esterase L1 (ubiquitin thiolesterase)                                   | 12513                           |

| <b>Gene Symbol</b> | <b>Gene Description</b>                                                                  | <b>Source: HGNC Symbol; Acc</b> |
|--------------------|------------------------------------------------------------------------------------------|---------------------------------|
| <i>WISP2</i>       | WNT1 inducible signaling pathway protein 2                                               | 12770                           |
| <i>WNT5B</i>       | wingless-type MMTV integration site family, member 5B                                    | 16265                           |
| <i>XG</i>          | Xg pseudogene, Y-linked 2                                                                | 34022                           |
| <i>ZNF503</i>      | zinc finger protein 503                                                                  | 23589                           |
| REFERENCE          | GENES                                                                                    |                                 |
| <i>G6PD</i>        | glucose-6-phosphate dehydrogenase                                                        | 4057                            |
| <i>GAPDH</i>       | glyceraldehyde-3-phosphate dehydrogenase                                                 | 4141                            |
| <i>YWHAZ</i>       | tyrosine 3-monooxygenase/tryptophan 5-monooxygenase activation protein, zeta polypeptide | 12855                           |

**Table S7.** Clinical, cellular and molecular features of the 26 patients analyzed in this study.

| Patient Code         | disease | Clinical severity <sup>b</sup> | Sex | Mutated gene        | Mutated alleles                                                     | UDS <sup>c</sup> | TFIIH level <sup>d</sup> | Refs <sup>e</sup> |
|----------------------|---------|--------------------------------|-----|---------------------|---------------------------------------------------------------------|------------------|--------------------------|-------------------|
| TTD1RO               | PS-TTD  | Severe                         | F   | <i>ERCC2/XPD</i>    | p.[Arg658Cys];[Gly713Arg]                                           | 45               | 35                       | 20                |
| TTD6VI               | PS-TTD  | Mild                           | M   | <i>ERCC3/XPB</i>    | p.[Thr119Pro];[Thr119Pro]                                           | 40               | 42                       | 3,4               |
| TTD7PV               | PS-TTD  | Severe                         | F   | <i>ERCC2/XPD</i>    | p.[Leu461Val;Val716_Arg730del];[Arg722Trp]                          | 15               | 56                       | 1,2,6,8           |
| TTD8PV               | PS-TTD  | Moderate                       | M   | <i>ERCC2/XPD</i>    | p.[Arg112His];[Arg112His]                                           | 10               | 34                       | 1,2,3,4-6,8       |
| TTD11PV              | PS-TTD  | Severe                         | M   | <i>ERCC2/XPD</i>    | p.[Arg112His];[Val121_Glu159del]                                    | 10               | 43                       | 2,3,8             |
| TTD12PV <sup>a</sup> | PS-TTD  | Severe                         | M   | <i>ERCC2/XPD</i>    | p.[Cys259Tyr];[Arg722Trp]                                           | 20               | 65                       | 2,3,8             |
| TTD13PV              | PS-TTD  | Mild                           | M   | <i>GTF2H5/TTDA</i>  | p.[Met1Thr];[Met1Thr]                                               | 10               | 30                       | 13,14             |
| TTD14PV              | PS-TTD  | Moderate                       | M   | <i>GTF2H5/TTDA</i>  | p.[Met1Thr];[Met1Thr]                                               | 15               | 30                       | 13,14             |
| TTD15PV <sup>a</sup> | PS-TTD  | Severe                         | M   | <i>ERCC2/XPD</i>    | p.[Cys259Tyr];[Arg722Trp]                                           | 20               | 60                       | 2,8               |
| TTD20PV              | PS-TTD  | Severe                         | F   | <i>ERCC2/XPD</i>    | p.[Arg112His];[Leu461Val;Val716_Arg730del]                          | 10               | 46                       | 8                 |
| TTD22PV              | PS-TTD  | Moderate                       | M   | <i>ERCC2/XPD</i>    | p.[Gln662*];[Glu731Val-fs*100;Glu731_Gly735delins42;Glu731Glyfs*50] | 30               | 60                       | 8,18              |
| TTD23PV              | PS-TTD  | Severe                         | F   | <i>ERCC2/XPD</i>    | p.[0];[Arg112His]                                                   | 7                | 36                       | 7,8               |
| TTD24PV              | PS-TTD  | Moderate                       | M   | <i>ERCC2/XPD</i>    | p.[Glu317Aspfs*110, =];[Arg722Trp]                                  | 40               | 55                       | 18                |
| TTD35PV              | PS-TTD  | Moderate                       | M   | <i>ERCC2/XPD</i>    | na                                                                  | 47               | 56                       | This study        |
| TTD1BR               | PS-TTD  | Moderate                       | M   | <i>GTF2H5/TTDA</i>  | p.[Leu21Pro];[Arg56*]                                               | 25               | 30                       | 3,4,12,13         |
| TTD16PV              | NPS-TTD | Severe                         | F   | <i>MPLKIP/TTDN1</i> | p.[His50Alafs*8];[His50Alafs*8]                                     | 101              | 112                      | 15,16             |
| TTD18PV              | NPS-TTD | No info                        | F   | <i>TARS1</i>        | p.[Lys276Glu];[Arg638*]                                             | 105              | 108                      | 19                |
| TTD28PV              | PS-TTD  | Moderate                       | F   | <i>GTF2E2</i>       | p.[Asp187Tyr];[Asp187Tyr]                                           | 95               | 108                      | 17                |
| TTD31PV              | NPS-TTD | Moderate                       | F   | <i>MPLKIP/TTDN1</i> | p.[His50Alafs*8];[Ser93Profs*60]                                    | 113              | 120                      | 15,16             |
| TTD379BE             | NPS-TTD | Moderate                       | M   | <i>GTF2E2</i>       | p.[Ala150Pro];[Ala150Pro]                                           | na               | 92                       | 17,4              |
| 85RD251              | NPS-TTD | Mild                           | F   | <i>CARS1</i>        | p.[Arg341His];[Gln380*]                                             | 100              | /                        | 21                |
| XP1BR                | XP      | Severe                         | /   | <i>ERCC2/XPD</i>    | p.[Arg683Trp];[Arg683Trp]                                           | 30               | 83                       | 9                 |

|                     |    |          |   |                             |                                                  |    |     |               |
|---------------------|----|----------|---|-----------------------------|--------------------------------------------------|----|-----|---------------|
| XP15PV <sup>a</sup> | XP | Moderate | F | <i>ERCC2/</i><br><i>XPD</i> | p.[Arg683Gln];[Arg683Gln]                        | 26 | na  | 8,9           |
| XP16PV <sup>a</sup> | XP | Moderate | F | <i>ERCC2/</i><br><i>XPD</i> | p.[Arg683Gln];[Arg683Gln]                        | 25 | 108 | 3,8,9         |
| XP17PV              | XP | Mild     | M | <i>ERCC2/</i><br><i>XPD</i> | p.[Arg616Pro]; [ Arg683Trp]                      | 10 | 59  | 3,8,10<br>,11 |
| XP49BR              | XP | Severe   | M | <i>ERCC2/</i><br><i>XPD</i> | p.[Leu461Val;Val716_Arg730<br>del] ;[ Arg683Trp] | 15 | 83  | 8             |

**Abbreviations.** PS-TTD: photosensitive form of trichothiodystrophy; NPS-TTD: non-photosensitive form of trichothiodystrophy; XP: xeroderma pigmentosum; F: female; M: male; na: not analysed.

<sup>a</sup>TTD12PV and TTD15PV: brothers; XP15PV and XP16PV: sisters.

<sup>b</sup>Clinical severity in TTD refers to the degree of physical and mental impairment. For XP, it refers to the type and severity of skin lesions. See the quoted references for clinical details.

<sup>c</sup>UV-induced DNA repair synthesis (UDS) after irradiation with 10 J/m<sup>2</sup> observed in patient cells is expressed as percentage of that in normal cells analysed in parallel.

<sup>d</sup>TFIID levels measured by immunoblot analysis are expressed as percentage of that in normal cells analysed in parallel.

<sup>e</sup>References:

1. Stefanini M, Giliani S, Nardo T, Marinoni S, Nazzaro V, Rizzo R, Trevisan G. DNA repair investigations in nine Italian patients affected by trichothiodystrophy. *Mutat Res.* 1992; 273:119-125.
2. Botta E, Nardo T, Broughton B, Marinoni S, Lehmann AR, Stefanini M. Analysis of mutations in the *XPD* gene in Italian patients with trichothiodystrophy: site of mutation correlates with repair deficiency but gene dosage appears to determine clinical severity. *Am J Hum Genet.* 1998; 63:1036-1048.
3. Botta E, Nardo T, Lehmann AR, Egly JM, Pedrini AM, Stefanini M. Reduced level of the repair/transcription factor TFIID in trichothiodystrophy. *Hum Mol Genet.* 2002; 11:2919-2928.
4. Stefanini M, Lagomarsini P, Giliani S, Nardo T, Botta E, Peserico A, Kleijer WJ, Lehmann AR and Sarasin A. Genetic heterogeneity of the excision repair defect associated with trichothiodystrophy. *Carcinogenesis.* 1993a; 14:1101-1105.
5. Battistella PA, Peserico A. Central nervous system dysmyelination in PIBI(D)S syndrome: a further case. *Childs Nerv Syst.* 1996; 12:110-113
6. Dubaie S, Proietti de Santis L, Bienstock RJ, Keriell A, Stefanini M, van Houtten B, Egly JM. Basal transcription defect discriminates between xeroderma pigmentosum and trichothiodystrophy in XPD patients. *Mol Cell.* 2003; 11:1635-1646.
7. Orioli D, Compe E, Nardo T, Mura M, Giraudon C, Botta E, Arrigoni L, Peverali F.A., Egly JM, Stefanini M. *XPD* mutations in trichothiodystrophy hamper collagen VI expression and reveal a role of TFIID in transcription derepression. *Human Molecular Genetics*, 2013 1-13.
8. Arseni L, Lanzafame M, Compe E, Fortugno P, Afonso-Barroso A, Peverali FA, Zambruno G, Egly JM, Stefanini M, Orioli D. TFIID-dependent MMP-1 overexpression in trichothiodystrophy leads to extracellular matrix alterations in patient skin. *Pnas*, 2015; 112(5):1499-504.
9. Taylor EM, Broughton B, Botta E, Stefanini M, Sarasin A, Jaspers NGJ, Fawcett H, Harcourt SA, Arlett CF, Lehmann AR. Xeroderma pigmentosum and trichothiodystrophy are associated with different mutations in the *XPD (ERCC2)* repair/transcription gene. *Proc Natl Acad Sci USA.* 1997; 94:8658-8663.
10. Mariani E, Facchini A, Honorati MC, Lalli E, Berardesca E, Ghetti P, Marinoni S, Nuzzo F, Astaldi Ricotti GC, Stefanini M. Immune defects in families and patients with xeroderma pigmentosum and trichothiodystrophy. *Clin. Exp. Immunol.* 1992; 88:376-382.
11. Takayama K, Salazar EP, Lehmann A, Stefanini M, Thompson LH, Weber CA. Defects in the DNA repair and transcription gene *ERCC2* in the cancer-prone disorder xeroderma pigmentosum group D. *Cancer Res.* 1995; 55:5656-5663.
- 12 Stefanini M, et al. (1993) A new nucleotide-excision-repair gene associated with the disorder trichothiodystrophy. *Am J Hum Genet* 53(4):817-821
- 13 Giglia-Mari G, et al. (2004) A new, tenth subunit of TFIID is responsible for the DNA repair syndrome trichothiodystrophy group A. *Nat Genet* 36(7):714-719.
- 14 Stefanini M, Botta E, Lanzafame M, Orioli D (2010) Trichothiodystrophy: From basic mechanisms to clinical implications. *DNA Repair (Amst)* 9(1):2-10
- 15 Botta E, Offman J, Nardo T, Ricotti R, Zambruno G, Sansone D, Balestri P, Raams A, Kleijer WJ, Jaspers NG, Sarasin A, Lehmann AR, Stefanini M. (2007) Mutations in the *C7orf11 (TTDN1)* gene in six nonphotosensitive trichothiodystrophy patients: no obvious genotype-phenotype relationships. *Hum Mutat.* 28(1):92-6.
- 16 Elizabeth R. Heller, BA, Sikandar G. Khan, PhD, Christiane Kuschal, Ph.D., Deborah Tamura, MS, RN, John J. DiGiovanna, MD, and Kenneth H. Kraemer, MD. (2015) Mutations in the *TTDN1* gene are associated with a distinct trichothiodystrophy phenotype. *J Invest Dermatol.* 135(3): 734-741.
- 17 Kuschal C., Botta E., Orioli D., Digiovanna J.J., Seneca S., Keymolen K., Tamura D., Heller E., Khan S.G., Caligiuri G., Lanzafame M., Nardo T., Ricotti R., Peverali F.A., Stephens R., Zhao Y., Lehmann A.R., Baranello L., Levens D., Kraemer

K.H., and Stefanini M. (2016) GTF2E2 Mutations Destabilize the General Transcription Factor Complex TFIIE in Individuals with DNA Repair-Proficient Trichothiodystrophy. *Am J Hum Genet.*98(4): 627–642.

18 Botta E., Nardo T., Orioli D., Guglielmino R., Ricotti R., Bondanza S., Benedicenti F., Zambruno G., Stefanini M. (2009) Genotype-phenotype relationships in trichothiodystrophy patients with novel splicing mutations in the XPD gene.

19 Theil A. F., Botta E., Raams A., Smith D. E. C., Mendes M. I., Caligiuri G., Giachetti S., Bione S., Carriero R., Liberi G., Zardoni L., Swagemakers S. M. A., Salomons G. S., Sarasin A., Lehmann A., van der Spek P. J., Ogi T., Hoeijmakers J. H. J., Vermeulen W., Orioli D. (2019) Bi-allelic TARS mutations are associated with brittle hair phenotype. *Am. J. Hum. Genet.* 105: 434-440.

20 Vermeulen W., Rademakers S., Jaspers NG., Appeldoorn E., Raams A., Klein B., Kleijer WJ., Hansen LK., Hoeijmakers JH. (2001) A temperature-sensitive disorder in basal transcription and DNA repair in humans. *Nat Genet.* 2001 Mar;27(3):299-303.

21 Kuo ME., Theil AF. 2, Kievit A., Malicdan MC., Introne WI., Christian T., Verheijen FW., Smith DEC., Mendes ML., Husaarts-Odijk L., van der Meijden E., van Slegtenhorst M., Wilke M., Vermeulen W., Raams A., Groden C., Shimada S., Meyer-Schuman R., Ming Hou Y., Gahl WA., Antonellis A., Salomons GS., Mancini GMS. (2019) Cysteinyl-tRNA Synthetase Mutations Cause a Multi-System, Recessive Disease That Includes Microcephaly, Developmental Delay, and Brittle Hair and Nails. *Am J Hum Genet.* 104(3):520-529.

**Table S8.** Expression levels of the 174 deregulated genes in TTD-pool vs Control-pool in basal condition, analyzed by RealTime Ready Custom Panels

| Gene Symbol | Source: HGNC Symbol; Acc | TTD patients nt        |                              | Control nt             |                              | Fold Change <sup>b</sup> |
|-------------|--------------------------|------------------------|------------------------------|------------------------|------------------------------|--------------------------|
|             |                          | C <sub>t</sub> Mean±SD | ΔC <sub>t</sub> <sup>a</sup> | C <sub>t</sub> Mean±SD | ΔC <sub>t</sub> <sup>a</sup> |                          |
| ACOT1       | 41                       | 29.88±0.05             | 4.45                         | 28.53±1.01             | 4.30                         | -1.110                   |
| ADM         | 359                      | 28.41±0.21             | 3.17                         | 27.50±1.18             | 3.47                         | 1.233                    |
| ADRA2A      | 281                      | 26.75±0.21             | 1.32                         | 26.64±0.20             | 2.42                         | 2.139                    |
| AHR         | 348                      | 27.69±0.02             | 2.45                         | 26.13±0.86             | 2.09                         | -1.279                   |
| AKAP2       | 372                      | 25.42±0.18             | 0.18                         | 23.97±0.79             | -0.07                        | -1.186                   |
| AKR1C2      | 385                      | 27.14±0.02             | 1.90                         | 25.28±1.17             | 1.25                         | -1.567                   |
| ALDH1A3     | 409                      | 27.12±0.06             | 1.70                         | 25.95±1.00             | 1.73                         | 1.022                    |
| ALDH1B1     | 407                      | 30.16±0.21             | 4.73                         | 28.49±1.15             | 4.26                         | -1.382                   |
| ALDH3B1     | 410                      | 29.72±0.08             | 4.29                         | 28.44±1.03             | 4.21                         | -1.055                   |
| ANGPTL4     | 16039                    | 29.86±0.10             | 4.62                         | 28.76±0.96             | 4.73                         | 1.077                    |
| ANP32A      | 13233                    | 27.77±0.08             | 2.53                         | 26.45±0.98             | 2.41                         | -1.087                   |
| ANTXR1      | 21014                    | 26.20±0.04             | 0.96                         | 24.90±1.01             | 0.87                         | -1.067                   |
| AP000654.2  | -                        | 27.55±0.08             | 2.31                         | 25.84±0.86             | 1.81                         | -1.417                   |
| AP1S2       | 560                      | 26.13±0.33             | 0.71                         | 25.62±0.18             | 1.39                         | 1.608                    |
| APBB1IP     | 17379                    | 33.36±0.22             | 7.93                         | 30.70±1.03             | 6.47                         | -2.745                   |
| ARHGAP23    | 29293                    | 28.98±0.11             | 3.74                         | 28.58±0.74             | 4.55                         | 1.755                    |
| ASS1        | 758                      | 26.83±0.09             | 1.40                         | 25.81±1.09             | 1.58                         | 1.133                    |
| ATF5        | 790                      | 28.68±0.03             | 3.26                         | 26.58±1.20             | 2.36                         | -1.864                   |
| ATP13A3     | 24113                    | 27.41±0.14             | 1.99                         | 25.44±1.10             | 1.21                         | -1.707                   |
| C14orf4     | -                        | 30.98±0.01             | 5.74                         | 29.03±1.23             | 4.99                         | -1.672                   |
| C15orf39    | -                        | 30.41±0.36             | 5.17                         | 28.80±0.68             | 4.76                         | -1.321                   |
| C1orf198    | -                        | 26.68±0.05             | 1.25                         | 25.33±1.29             | 1.10                         | -1.110                   |
| C4orf49     | -                        | 28.14±0.11             | 2.72                         | 27.73±0.13             | 3.51                         | 1.731                    |
| C8orf58     | -                        | 29.36±0.30             | 4.12                         | 27.86±0.75             | 3.82                         | -1.228                   |
| CABLES1     | 25097                    | 32.62±0.00             | 7.38                         | 31.31±1.14             | 7.28                         | -1.074                   |
| CAMK2N1     | 24190                    | 33.25±0.32             | 7.82                         | 32.33±0.54             | 8.10                         | 1.214                    |
| CCDC8       | 25367                    | 28.17±0.52             | 2.93                         | 27.06±0.57             | 3.03                         | 1.073                    |
| CCRL1       | 1611                     | 24.68±0.15             | -0.57                        | 24.66±0.51             | 0.62                         | 2.274                    |
| CLEC3B      | 11891                    | 29.26±0.11             | 3.83                         | 28.53±1.25             | 4.31                         | 1.392                    |
| CLGN        | 2060                     | 29.54±0.25             | 4.12                         | 30.04±0.23             | 5.82                         | 3.253                    |
| CLIC3       | 2064                     | 34.99±0.33             | 9.57                         | 32.91±1.64             | 8.68                         | -1.847                   |
| CLU         | 2095                     | 25.18±0.03             | -0.24                        | 22.53±1.19             | -1.70                        | -2.742                   |
| CNN1        | 2155                     | 29.51±0.21             | 4.27                         | 28.55±1.32             | 4.51                         | 1.184                    |
| COL4A1      | 2202                     | 30.06±0.13             | 4.64                         | 28.94±0.88             | 4.72                         | 1.058                    |
| CRABP2      | 2339                     | 25.01±0.06             | -0.41                        | 24.48±1.16             | 0.26                         | 1.593                    |
| CRLF1       | 2364                     | 28.85±0.11             | 3.42                         | 27.17±1.27             | 2.94                         | -1.392                   |
| CRYAB       | 2389                     | 30.34±0.86             | 4.92                         | 30.08±0.55             | 5.85                         | 1.912                    |
| CRYZ        | 2419                     | 31.75±0.14             | 6.33                         | 30.63±0.54             | 6.40                         | 1.056                    |
| CSRP2       | 2470                     | 28.53±0.14             | 3.11                         | 25.60±0.61             | 1.37                         | -3.321                   |
| CTGF        | 2500                     | 24.69±0.49             | -0.56                        | 22.58±0.68             | -1.46                        | -1.873                   |
| CTSC        | 2528                     | 27.58±0.07             | 2.34                         | 26.65±0.90             | 2.61                         | 1.209                    |
| CTSK        | 2536                     | 23.87±0.10             | -1.37                        | 22.24±0.99             | -1.80                        | -1.344                   |
| CYR61       | 2654                     | 22.82±0.16             | -2.42                        | 21.19±1.04             | -2.85                        | -1.347                   |
| DCAF4       | 20229                    | 30.91±0.05             | 5.67                         | 29.15±1.33             | 5.11                         | -1.469                   |
| DDIT3       | 2726                     | 28.68±0.21             | 3.44                         | 26.65±0.58             | 2.61                         | -1.774                   |

|           |       |            |       |            |       |         |
|-----------|-------|------------|-------|------------|-------|---------|
| DDIT4     | 24944 | 29.36±0.06 | 4.12  | 28.07±0.91 | 4.03  | -1.058  |
| DNAJB1    | 5270  | 29.89±0.11 | 4.65  | 28.70±1.05 | 4.66  | 1.009   |
| DPP4      | 3009  | 27.24±0.28 | 1.81  | 25.19±1.01 | 0.96  | -1.803  |
| DSP       | 3052  | 27.92±0.13 | 2.50  | 25.96±0.84 | 1.73  | -1.695  |
| DUSP1     | 3064  | 24.80±0.00 | -0.44 | 23.48±1.08 | -0.56 | -1.084  |
| EGR1      | 3238  | 26.12±0.03 | 0.88  | 24.88±0.92 | 0.84  | -1.028  |
| EIF4EBP1  | 3288  | 27.24±0.08 | 2.00  | 24.92±1.02 | 0.89  | -2.163  |
| EPDR1     | 17572 | 28.43±0.18 | 3.00  | 26.76±1.00 | 2.53  | -1.385  |
| EPS8L2    | 21296 | 30.89±0.29 | 5.65  | 30.06±0.87 | 6.02  | 1.297   |
| F2R       | 3537  | 29.15±0.12 | 3.72  | 27.15±1.14 | 2.92  | -1.741  |
| FAM118A   | 1313  | 30.98±0.13 | 5.74  | 29.76±0.82 | 5.73  | -1.009  |
| FAM43A    | 26888 | 24.57±0.16 | -0.67 | 24.32±0.47 | 0.28  | 1.936   |
| FBXO32    | 16731 | 30.25±0.04 | 5.01  | 28.20±0.95 | 4.16  | -1.798  |
| FGF7      | 3685  | 23.41±0.11 | -2.02 | 22.38±0.39 | -1.85 | 1.121   |
| FNDC4     | 20239 | 29.90±0.02 | 4.47  | 28.56±1.28 | 4.34  | -1.097  |
| FOSB      | 3797  | 29.26±0.09 | 4.02  | 28.95±0.70 | 4.91  | 1.860   |
| FOXO3     | 3821  | 32.68±0.06 | 7.44  | 31.50±1.25 | 7.46  | 1.020   |
| GADD45A   | 4095  | 30.08±0.49 | 4.84  | 28.10±0.93 | 4.06  | -1.707  |
| GADD45B   | 4096  | 33.06±0.57 | 7.82  | 31.53±1.31 | 7.50  | -1.251  |
| GALNTL2   | 21531 | 30.15±0.05 | 4.72  | 27.82±0.98 | 3.59  | -2.184  |
| GAS1      | 4165  | 28.58±0.07 | 3.34  | 27.02±1.04 | 2.98  | -1.280  |
| GAS5      | 10183 | 33.98±0.04 | 8.56  | 32.24±0.70 | 8.02  | -1.452  |
| GAS6      | 4168  | 25.66±0.10 | 0.24  | 24.24±1.34 | 0.01  | -1.166  |
| GDF15     | 30142 | 36.48±0.31 | 11.24 | 34.02±1.21 | 9.98  | -2.395  |
| GDF6      | 4221  | 35.58±0.21 | 10.34 | 30.88±0.85 | 6.84  | -11.249 |
| GLRX      | 4330  | 25.87±0.24 | 0.63  | 25.16±0.31 | 1.13  | 1.411   |
| GNG11     | 4403  | 33.13±0.03 | 7.71  | 33.59±0.13 | 9.36  | 3.157   |
| GPX3      | 4555  | 37.69±0.29 | 12.26 | 34.66±1.34 | 10.43 | -3.555  |
| GYPC      | 4704  | 29.55±0.01 | 4.13  | 27.79±1.01 | 3.57  | -1.473  |
| HAND2     | 4808  | 30.93±0.04 | 5.50  | 28.15±1.05 | 3.93  | -2.976  |
| HAPLN3    | 21446 | 31.15±0.15 | 5.72  | 28.67±1.19 | 4.44  | -2.428  |
| HERPUD1   | 13744 | 31.69±0.34 | 6.45  | 28.03±0.87 | 3.99  | -5.489  |
| HIST2H2BE | 4760  | 27.58±0.11 | 2.34  | 26.45±0.79 | 2.41  | 1.056   |
| HMOX1     | 5013  | 26.22±0.04 | 0.98  | 24.43±1.27 | 0.40  | -1.498  |
| HNRNPA1   | 5031  | 29.25±0.49 | 4.01  | 27.86±0.43 | 3.82  | -1.137  |
| HOXB7     | 5118  | 36.54±0.66 | 11.30 | 33.62±1.11 | 9.58  | -3.294  |
| HOXC10    | 5122  | 28.82±0.01 | 3.40  | 28.68±1.20 | 4.45  | 2.078   |
| HOXC9     | 5130  | 31.02±0.07 | 5.60  | 29.84±1.08 | 5.61  | 1.010   |
| HSD3B7    | 18324 | 28.46±0.12 | 3.03  | 26.84±0.80 | 2.61  | -1.338  |
| HSPA2     | 5235  | 26.42±0.14 | 1.18  | 26.71±0.43 | 2.67  | 2.809   |
| HSPB7     | 5249  | 26.80±0.19 | 1.37  | 25.49±0.94 | 1.27  | -1.074  |
| ID1       | 5360  | 21.63±0.14 | -3.61 | 21.12±0.11 | -2.91 | 1.621   |
| ID3       | 5362  | 24.79±0.05 | -0.46 | 23.38±1.12 | -0.65 | -1.147  |
| IER3      | 5392  | 24.90±0.02 | -0.35 | 22.80±1.07 | -1.23 | -1.851  |
| IGFBP4    | 5473  | 26.16±0.11 | 0.73  | 25.11±0.46 | 0.88  | 1.110   |
| IL13RA2   | 5975  | 25.83±0.14 | 0.41  | 26.26±0.30 | 2.04  | 3.099   |
| IL20RB    | 6004  | 32.02±0.16 | 6.60  | 27.78±1.10 | 3.55  | -8.234  |
| IL6       | 6018  | 29.44±0.23 | 4.20  | 27.53±0.77 | 3.49  | -1.636  |
| IRF2BP2   | 21729 | 27.24±0.01 | 2.00  | 26.27±1.01 | 2.23  | 1.176   |
| IRS2      | 6126  | 26.57±0.30 | 1.33  | 24.69±0.52 | 0.66  | -1.595  |
| JUN       | 6204  | 26.17±0.40 | 0.92  | 25.03±0.23 | 0.99  | 1.046   |



|          |        |            |       |            |       |        |
|----------|--------|------------|-------|------------|-------|--------|
| JUND     | 6206   | 31.63±0.06 | 6.39  | 31.08±0.60 | 7.04  | 1.569  |
| KCNE4    | 6244   | 33.69±0.32 | 8.45  | 32.62±1.26 | 8.58  | 1.101  |
| KRT34    | 6452   | 29.32±0.05 | 4.08  | 27.99±1.00 | 3.95  | -1.091 |
| KRTAP1-5 | 16777  | 27.86±0.16 | 2.44  | 26.86±1.17 | 2.63  | 1.145  |
| LBH      | 29532  | 27.55±0.04 | 2.31  | 25.08±1.04 | 1.04  | -2.398 |
| LDOC1    | 6548   | 30.76±0.08 | 5.33  | 29.76±1.06 | 5.53  | 1.149  |
| LGALS3BP | 6564   | 29.55±0.06 | 4.12  | 27.65±1.22 | 3.43  | -1.617 |
| LGR4     | 13299  | 28.15±0.04 | 2.91  | 27.39±1.28 | 3.35  | 1.360  |
| LIF      | 6596   | 27.56±0.11 | 2.32  | 25.88±0.79 | 1.85  | -1.384 |
| LMCD1    | 6633   | 25.86±0.13 | 0.62  | 24.32±1.15 | 0.28  | -1.258 |
| LMO7     | 6646   | 23.73±0.25 | -1.70 | 22.30±0.57 | -1.92 | -1.171 |
| LRRC15   | 20818  | 29.22±0.16 | 3.79  | 26.69±1.25 | 2.47  | -2.502 |
| LRRC32   | 4161   | 29.90±0.21 | 4.48  | 28.07±0.98 | 3.85  | -1.546 |
| MALAT1   | 29665  | 32.72±0.13 | 7.48  | 31.77±1.04 | 7.73  | 1.196  |
| MALL     | 6818   | 27.45±0.10 | 2.03  | 26.72±1.36 | 2.49  | 1.380  |
| MFAP5    | 29673  | 23.94±0.30 | -1.31 | 22.56±0.48 | -1.48 | -1.126 |
| MIDN     | 13824  | 27.44±0.16 | 2.20  | 25.99±0.95 | 1.96  | -1.180 |
| MMS19    | 16298  | 30.23±0.09 | 4.99  | 29.03±1.14 | 4.99  | 1.003  |
| MOXD1    | 7155   | 26.11±0.08 | 0.68  | 25.06±1.02 | 0.83  | 1.110  |
| MP1      | 21063  | 22.46±0.17 | -2.97 | 22.51±0.55 | -1.72 | 2.370  |
| MT1E     | 7404   | 25.35±0.35 | 0.11  | 24.24±0.43 | 0.20  | 1.064  |
| MT2A     | 7406   | 22.73±0.20 | -2.51 | 21.00±0.82 | -3.04 | -1.441 |
| MUC1     | 7508   | 29.53±0.03 | 4.29  | 28.16±1.13 | 4.13  | -1.120 |
| MYADM    | 7544   | 31.02±0.21 | 5.78  | 28.87±1.43 | 4.83  | -1.927 |
| MYC      | 7553   | 27.13±0.21 | 1.89  | 25.46±0.71 | 1.42  | -1.380 |
| MYL9     | 15754  | 23.14±0.03 | -2.29 | 21.59±1.22 | -2.63 | -1.273 |
| MYLK     | 7590   | 29.17±0.27 | 3.75  | 28.25±0.95 | 4.02  | 1.213  |
| NBL1     | 7650   | 28.85±0.27 | 3.43  | 27.71±0.72 | 3.48  | 1.039  |
| NQO1     | 2874   | 25.98±0.04 | 0.56  | 24.87±0.82 | 0.64  | 1.063  |
| PAM      | 8596   | 24.05±0.36 | -1.20 | 23.34±0.35 | -0.70 | 1.409  |
| PCDH10   | 13404  | 27.76±0.23 | 2.33  | 28.82±0.25 | 4.59  | 4.790  |
| PHGDH    | 8923   | 29.40±0.27 | 3.98  | 27.36±1.41 | 3.14  | -1.788 |
| PIK3IP1  | 24942  | 29.31±0.12 | 3.88  | 28.80±1.21 | 4.58  | 1.621  |
| PLEKHO2  | 30026  | 30.67±0.11 | 5.43  | 29.38±0.75 | 5.34  | -1.061 |
| PLXNB1   | 9103   | 28.24±0.16 | 2.81  | 26.91±0.82 | 2.69  | -1.089 |
| PMP22    | 9118   | 27.97±0.06 | 2.54  | 26.12±1.11 | 1.89  | -1.569 |
| POSTN    | 16953  | 28.07±0.08 | 2.64  | 25.52±1.05 | 1.29  | -2.543 |
| PPP1R3C  | 9293   | 28.08±0.19 | 2.84  | 27.14±1.17 | 3.11  | 1.207  |
| PSG1     | 9514   | 26.41±0.01 | 0.98  | 27.29±0.19 | 3.06  | 4.238  |
| PSG4     | 9521   | 26.94±0.15 | 1.51  | 25.10±0.17 | 0.88  | -1.551 |
| PTGES    | 9599   | 29.72±0.08 | 4.30  | 29.18±1.12 | 4.96  | 1.582  |
| PTGIS    | 9603   | 29.02±0.17 | 3.60  | 25.79±1.15 | 1.56  | -4.098 |
| PTGS1    | 9604   | 29.34±0.21 | 3.91  | 26.75±1.21 | 2.52  | -2.615 |
| QPCT     | 9753   | 30.43±0.01 | 5.19  | 29.08±0.88 | 5.04  | -1.107 |
| RAB3B    | 9778   | 30.44±0.13 | 5.02  | 29.22±0.89 | 4.99  | -1.017 |
| RPL22L1  | 27610  | 33.28±0.10 | 7.86  | 31.26±0.17 | 7.04  | -1.763 |
| RPL36A   | 135255 | 19.96±0.00 | -5.28 | 19.94±0.07 | -4.09 | 2.276  |
| RPS21    | 10409  | 20.89±0.19 | -4.36 | 20.68±0.13 | -3.36 | 1.998  |
| RPS3     | 10420  | 22.66±0.06 | -2.59 | 21.24±0.84 | -2.80 | -1.158 |
| RSPO3    | 20866  | 27.29±0.06 | 2.05  | 26.30±0.83 | 2.26  | 1.163  |
| SERINC2  | 23231  | 31.18±0.36 | 5.75  | 29.27±1.30 | 5.04  | -1.636 |

|           |       |            |       |            |       |         |
|-----------|-------|------------|-------|------------|-------|---------|
| SERPINH1  | 1546  | 24.78±0.01 | -0.46 | 22.92±1.24 | -1.12 | -1.580  |
| SFRP4     | 10778 | 30.10±0.10 | 4.68  | 27.68±0.55 | 3.45  | -2.338  |
| SGK1      | 10810 | 25.63±0.06 | 0.39  | 23.69±1.03 | -0.34 | -1.662  |
| SH3BGR    | 10822 | 30.18±0.18 | 4.76  | 29.12±0.43 | 4.89  | 1.101   |
| SLC16A3   | 10924 | 27.74±0.05 | 2.31  | 26.54±1.33 | 2.32  | 1.005   |
| SLC2A1    | 11005 | 29.95±0.01 | 4.71  | 28.15±1.24 | 4.12  | -1.509  |
| SMAD7     | 6773  | 28.28±0.24 | 2.86  | 26.66±1.23 | 2.43  | -1.343  |
| SOCS1     | 19383 | 28.81±0.13 | 3.57  | 29.29±0.27 | 5.25  | 3.223   |
| SPON2     | 11253 | 27.69±0.08 | 2.27  | 26.53±1.13 | 2.30  | 1.025   |
| STBD1     | 24854 | 28.03±0.21 | 2.79  | 26.61±0.69 | 2.57  | -1.165  |
| STC2      | 11374 | 29.15±0.25 | 3.73  | 27.65±1.22 | 3.43  | -1.230  |
| STMN2     | 10577 | 25.68±0.30 | 0.26  | 23.08±0.61 | -1.15 | -2.642  |
| SYNPO2    | 17732 | 33.46±0.16 | 8.03  | 32.53±1.00 | 8.30  | 1.206   |
| TBX1      | 11592 | 34.70±0.57 | 9.28  | 31.17±0.92 | 6.95  | -5.022  |
| TFPI2     | 11761 | 24.14±0.25 | -1.29 | 24.28±0.39 | 0.06  | 2.534   |
| TGM2      | 11778 | 36.44±0.32 | 11.01 | 35.15±1.51 | 10.92 | -1.062  |
| THBS1     | 11785 | 20.77±0.16 | -4.48 | 19.48±1.25 | -4.56 | -1.061  |
| THBS2     | 11786 | 26.01±0.20 | 0.59  | 24.77±0.83 | 0.54  | -1.032  |
| TM4SF1    | 11853 | 25.57±0.08 | 0.15  | 27.42±0.21 | 3.19  | 8.253   |
| TNFRSF12A | 18152 | 25.62±0.01 | 0.38  | 24.29±0.93 | 0.25  | -1.092  |
| TOB1      | 11979 | 25.65±0.27 | 0.41  | 25.47±0.30 | 1.43  | 2.033   |
| TSC22D3   | 3051  | 30.41±0.11 | 5.17  | 28.43±1.28 | 4.39  | -1.717  |
| UCHL1     | 12513 | 23.73±0.23 | -1.51 | 23.48±0.38 | -0.56 | 1.932   |
| WISP2     | 12770 | 33.51±0.00 | 8.09  | 28.76±0.20 | 4.53  | -11.726 |
| WNT5B     | 16265 | 28.18±0.13 | 2.75  | 26.50±1.19 | 2.27  | -1.392  |
| XG        | 34022 | 27.53±0.06 | 2.11  | 26.16±0.43 | 1.93  | -1.129  |
| ZNF503    | 23589 | 25.52±0.11 | 0.10  | 24.76±0.25 | 0.53  | 1.355   |

**Abbreviations.** SD, standard deviation.

<sup>a</sup> the  $\Delta C_t$  value was calculated as [ $C_t$  of the selected gene -  $C_t$  of the reference genes].

<sup>b</sup> the Fold Change in the TTD pool versus Control pool in basal condition was calculated as  $2^{-(\Delta C_t \text{ patients} - \Delta C_t \text{ controls})}$  by using the  $2^{-\Delta \Delta C_t}$  method (Livak and Schmittgen, 2001). A Fold Change = 1 indicates no variation in the gene expression between the two pools. Fold Change values > +1 correspond to genes with increased expression in the TTD pool compared to Control pool whereas Fold Change values < -1 correspond to genes with lowered expression in the TTD pool compared to Control pool.

**Table S9.** Expression levels of the 174 deregulated genes in TTD vs Control pool upon UV irradiation, analyzed by RealTime Ready Custom Panels

| Gene Symbol | Source: HGNC Symbol; Acc | TTD patients uv        |                              | Control uv             |                              | Fold Change <sup>b</sup> |
|-------------|--------------------------|------------------------|------------------------------|------------------------|------------------------------|--------------------------|
|             |                          | C <sub>t</sub> Mean±SD | ΔC <sub>t</sub> <sup>a</sup> | C <sub>t</sub> Mean±SD | ΔC <sub>t</sub> <sup>a</sup> |                          |
| HOXB7       | 5118                     | 34.71±0.98             | 10.31                        | 37.43±3.64             | 12.20                        | 3.702                    |
| ACOT1       | 41                       | 28.77±1.17             | 4.18                         | 29.70±0.20             | 4.27                         | 1.062                    |
| ADM         | 359                      | 27.48±1.13             | 3.08                         | 28.41±0.20             | 3.18                         | 1.069                    |
| ADRA2A      | 281                      | 26.34±0.18             | 1.75                         | 27.06±0.21             | 1.63                         | -1.084                   |
| AHR         | 348                      | 26.86±1.13             | 2.46                         | 27.55±0.14             | 2.32                         | -1.104                   |
| AKAP2       | 372                      | 24.85±0.95             | 0.45                         | 25.32±0.33             | 0.08                         | -1.285                   |
| AKR1C2      | 385                      | 25.74±1.17             | 1.34                         | 26.68±0.14             | 1.45                         | 1.077                    |
| ALDH1A3     | 409                      | 26.47±1.10             | 1.88                         | 27.28±0.08             | 1.85                         | -1.027                   |
| ALDH1B1     | 407                      | 29.76±1.29             | 5.17                         | 29.55±0.00             | 4.12                         | -2.066                   |
| ALDH3B1     | 410                      | 28.61±1.25             | 4.02                         | 29.38±0.14             | 3.95                         | -1.050                   |
| ANGPTL4     | 16039                    | 30.83±1.06             | 6.43                         | 30.10±0.06             | 4.87                         | -2.966                   |
| ANP32A      | 13233                    | 26.69±1.09             | 2.29                         | 27.58±0.24             | 2.35                         | 1.040                    |
| ANTXR1      | 21014                    | 25.31±1.11             | 0.91                         | 25.85±0.09             | 0.62                         | -1.230                   |
| AP000654.2  | -                        | 26.36±1.16             | 1.96                         | 27.23±0.17             | 2.00                         | 1.028                    |
| AP1S2       | 560                      | 25.82±0.11             | 1.23                         | 26.13±0.31             | 0.70                         | -1.444                   |
| APBB1IP     | 17379                    | 32.36±1.37             | 7.77                         | 31.94±0.08             | 6.51                         | -2.389                   |
| ARHGAP23    | 29293                    | 28.37±1.12             | 3.97                         | 30.07±0.02             | 4.84                         | 1.821                    |
| ASS1        | 758                      | 25.82±1.24             | 1.23                         | 27.33±0.16             | 1.90                         | 1.582                    |
| ATF5        | 790                      | 27.57±1.30             | 2.98                         | 27.49±0.15             | 2.06                         | -1.899                   |
| ATP13A3     | 24113                    | 27.38±1.33             | 2.79                         | 27.67±0.14             | 2.24                         | -1.464                   |
| C14orf4     | -                        | 29.94±1.53             | 5.54                         | 30.64±0.09             | 5.41                         | -1.096                   |
| C15orf39    | -                        | 30.43±0.76             | 6.03                         | 30.33±0.54             | 5.10                         | -1.907                   |
| C1orf198    | -                        | 26.05±1.42             | 1.46                         | 27.14±0.20             | 1.71                         | 1.186                    |
| C4orf49     | -                        | 27.83±0.13             | 3.24                         | 28.22±0.37             | 2.79                         | -1.368                   |
| C8orf58     | -                        | 29.08±0.84             | 4.68                         | 29.20±0.05             | 3.97                         | -1.638                   |
| CABLES1     | 25097                    | 31.84±1.26             | 7.44                         | 32.94±0.01             | 7.71                         | 1.199                    |
| CAMK2N1     | 24190                    | 33.13±0.49             | 8.54                         | 33.17±0.70             | 7.74                         | -1.747                   |
| CCDC8       | 25367                    | 28.17±0.48             | 3.77                         | 28.57±0.37             | 3.34                         | -1.350                   |
| CCRL1       | 1611                     | 23.86±0.58             | -0.54                        | 25.51±0.34             | 0.28                         | 1.761                    |
| CLEC3B      | 11891                    | 28.14±1.32             | 3.55                         | 29.64±0.23             | 4.21                         | 1.578                    |
| CLGN        | 2060                     | 29.30±0.33             | 4.71                         | 30.56±0.35             | 5.13                         | 1.338                    |
| CLIC3       | 2064                     | 33.87±1.61             | 9.28                         | 34.20±0.08             | 8.77                         | -1.421                   |
| CLU         | 2095                     | 24.09±1.25             | -0.50                        | 23.83±0.21             | -1.61                        | -2.151                   |
| CNN1        | 2155                     | 28.55±1.25             | 4.15                         | 29.35±0.16             | 4.12                         | -1.025                   |
| COL4A1      | 2202                     | 29.84±1.16             | 5.25                         | 30.21±0.13             | 4.78                         | -1.382                   |
| CRABP2      | 2339                     | 23.85±1.20             | -0.74                        | 25.74±0.25             | 0.31                         | 2.063                    |
| CRLF1       | 2364                     | 28.03±1.52             | 3.44                         | 28.34±0.32             | 2.91                         | -1.446                   |
| CRYAB       | 2389                     | 30.21±0.36             | 5.62                         | 30.79±0.33             | 5.36                         | -1.202                   |
| CRYZ        | 2419                     | 30.87±0.74             | 6.28                         | 31.75±0.61             | 6.32                         | 1.030                    |
| CSRP2       | 2470                     | 27.28±0.70             | 2.69                         | 26.68±0.53             | 1.25                         | -2.729                   |
| CTGF        | 2500                     | 24.72±0.83             | 0.32                         | 23.77±0.14             | -1.46                        | -3.434                   |
| CTSC        | 2528                     | 26.50±0.99             | 2.10                         | 27.70±0.38             | 2.47                         | 1.289                    |
| CTSK        | 2536                     | 22.72±1.09             | -1.68                        | 23.42±0.16             | -1.82                        | -1.098                   |
| CYR61       | 2654                     | 21.75±1.21             | -2.65                        | 21.64±0.13             | -3.60                        | -1.930                   |
| DCAF4       | 20229                    | 30.39±1.40             | 5.99                         | 30.82±0.13             | 5.59                         | -1.320                   |
| DDIT3       | 2726                     | 27.69±0.77             | 3.29                         | 27.56±0.29             | 2.33                         | -1.948                   |

|           |       |            |       |            |       |         |
|-----------|-------|------------|-------|------------|-------|---------|
| DDIT4     | 24944 | 27.70±1.00 | 3.30  | 29.02±0.12 | 3.79  | 1.400   |
| DNAJB1    | 5270  | 28.79±1.18 | 4.39  | 29.43±0.22 | 4.20  | -1.147  |
| DPP4      | 3009  | 26.21±1.26 | 1.62  | 26.45±0.17 | 1.02  | -1.519  |
| DSP       | 3052  | 27.43±1.25 | 2.84  | 27.77±0.13 | 2.34  | -1.417  |
| DUSP1     | 3064  | 23.56±1.27 | -0.84 | 24.14±0.30 | -1.10 | -1.191  |
| EGR1      | 3238  | 24.55±1.15 | 0.15  | 24.37±0.14 | -0.86 | -2.009  |
| EIF4EBP1  | 3288  | 26.09±1.08 | 1.69  | 25.98±0.24 | 0.75  | -1.919  |
| EPDR1     | 17572 | 27.48±1.16 | 2.89  | 27.86±0.23 | 2.43  | -1.384  |
| EPS8L2    | 21296 | 29.93±1.15 | 5.53  | 30.66±0.11 | 5.43  | -1.072  |
| F2R       | 3537  | 28.21±1.42 | 3.62  | 28.63±0.19 | 3.20  | -1.343  |
| FAM118A   | 1313  | 30.58±0.85 | 6.18  | 31.03±0.01 | 5.80  | -1.309  |
| FAM43A    | 26888 | 24.72±0.43 | 0.32  | 24.76±0.24 | -0.47 | -1.725  |
| FBXO32    | 16731 | 29.58±1.20 | 5.18  | 29.79±0.07 | 4.56  | -1.540  |
| FGF7      | 3685  | 23.48±0.54 | -1.11 | 23.69±0.48 | -1.74 | -1.548  |
| FNDC4     | 20239 | 28.71±1.47 | 4.12  | 29.82±0.28 | 4.39  | 1.206   |
| FOSB      | 3797  | 28.25±1.06 | 3.85  | 28.88±0.05 | 3.65  | -1.155  |
| FOXO3     | 3821  | 32.68±1.42 | 8.28  | 33.53±0.11 | 8.30  | 1.010   |
| GADD45A   | 4095  | 28.24±1.05 | 3.84  | 28.11±0.15 | 2.88  | -1.957  |
| GADD45B   | 4096  | 32.24±1.35 | 7.84  | 31.55±0.62 | 6.32  | -2.868  |
| GALNTL2   | 21531 | 29.21±1.17 | 4.62  | 29.06±0.33 | 3.63  | -1.982  |
| GAS1      | 4165  | 27.35±1.17 | 2.95  | 28.47±0.32 | 3.24  | 1.216   |
| GAS5      | 10183 | 31.61±0.74 | 7.02  | 31.37±0.23 | 5.94  | -2.114  |
| GAS6      | 4168  | 24.65±1.49 | 0.06  | 25.50±0.18 | 0.07  | 1.006   |
| GDF15     | 30142 | 33.95±1.26 | 9.55  | 34.16±0.12 | 8.93  | -1.539  |
| GDF6      | 4221  | 35.33±1.00 | 10.93 | 32.51±0.04 | 7.28  | -12.568 |
| GLRX      | 4330  | 25.39±0.32 | 0.99  | 25.72±0.20 | 0.49  | -1.411  |
| GNG11     | 4403  | 33.55±0.22 | 8.96  | 33.89±0.24 | 8.46  | -1.417  |
| GPX3      | 4555  | 36.61±1.58 | 12.02 | 35.95±0.00 | 10.52 | -2.828  |
| GYPC      | 4704  | 28.62±1.31 | 4.03  | 28.81±0.16 | 3.38  | -1.573  |
| HAND2     | 4808  | 29.92±1.04 | 5.33  | 29.48±0.47 | 4.05  | -2.423  |
| HAPLN3    | 21446 | 30.71±1.25 | 6.12  | 30.11±0.14 | 4.68  | -2.707  |
| HERPUD1   | 13744 | 30.02±1.30 | 5.62  | 30.25±0.85 | 5.02  | -1.516  |
| HIST2H2BE | 4760  | 26.90±1.23 | 2.50  | 27.82±0.09 | 2.59  | 1.063   |
| HMOX1     | 5013  | 26.02±1.28 | 1.62  | 26.27±0.04 | 1.04  | -1.504  |
| HNRNPA1   | 5031  | 28.32±0.54 | 3.92  | 28.74±0.23 | 3.51  | -1.332  |
| HOXC10    | 5122  | 27.66±1.14 | 3.07  | 30.04±0.21 | 4.61  | 2.891   |
| HOXC9     | 5130  | 29.62±0.94 | 5.03  | 30.85±0.16 | 5.42  | 1.303   |
| HSD3B7    | 18324 | 27.27±0.93 | 2.68  | 27.67±0.29 | 2.24  | -1.358  |
| HSPA2     | 5235  | 25.76±0.37 | 1.36  | 27.17±0.40 | 1.94  | 1.498   |
| HSPB7     | 5249  | 26.27±1.13 | 1.68  | 26.49±0.20 | 1.06  | -1.540  |
| ID1       | 5360  | 22.57±0.06 | -1.83 | 21.16±0.06 | -4.08 | -4.729  |
| ID3       | 5362  | 24.97±1.18 | 0.57  | 24.90±0.15 | -0.34 | -1.868  |
| IER3      | 5392  | 23.34±1.22 | -1.06 | 22.90±0.12 | -2.34 | -2.426  |
| IGFBP4    | 5473  | 25.73±0.98 | 1.14  | 25.83±0.22 | 0.40  | -1.680  |
| IL13RA2   | 5975  | 25.54±0.28 | 0.95  | 26.89±0.11 | 1.46  | 1.416   |
| IL20RB    | 6004  | 30.70±1.36 | 6.11  | 28.95±0.21 | 3.52  | -6.028  |
| IL6       | 6018  | 27.68±1.09 | 3.28  | 28.39±0.28 | 3.16  | -1.093  |
| IRF2BP2   | 21729 | 27.14±1.24 | 2.74  | 27.53±0.19 | 2.30  | -1.364  |
| IRS2      | 6126  | 26.01±0.55 | 1.61  | 25.85±0.36 | 0.62  | -1.993  |
| JUN       | 6204  | 26.81±0.12 | 2.41  | 25.86±0.26 | 0.63  | -3.438  |
| JUND      | 6206  | 30.75±0.92 | 6.35  | 31.27±0.03 | 6.04  | -1.243  |
| KCNE4     | 6244  | 31.86±1.38 | 7.46  | 32.50±0.06 | 7.27  | -1.142  |

|          |        |            |       |            |       |        |
|----------|--------|------------|-------|------------|-------|--------|
| KRT34    | 6452   | 28.52±1.20 | 4.12  | 28.82±0.08 | 3.59  | -1.444 |
| KRTAP1-5 | 16777  | 26.70±1.29 | 2.11  | 28.05±0.18 | 2.62  | 1.427  |
| LBH      | 29532  | 27.03±1.14 | 2.63  | 26.97±0.23 | 1.74  | -1.853 |
| LDOC1    | 6548   | 29.77±1.14 | 5.18  | 30.64±0.25 | 5.21  | 1.021  |
| LGALS3BP | 6564   | 28.67±1.28 | 4.08  | 28.67±0.17 | 3.24  | -1.786 |
| LGR4     | 13299  | 27.72±1.41 | 3.32  | 28.96±0.03 | 3.73  | 1.332  |
| LIF      | 6596   | 27.16±1.19 | 2.76  | 27.55±0.05 | 2.32  | -1.358 |
| LMCD1    | 6633   | 25.89±1.28 | 1.49  | 26.43±0.23 | 1.20  | -1.227 |
| LMO7     | 6646   | 23.04±0.59 | -1.55 | 23.77±0.44 | -1.66 | -1.077 |
| LRRC15   | 20818  | 28.31±1.45 | 3.72  | 27.96±0.18 | 2.53  | -2.276 |
| LRRC32   | 4161   | 29.18±1.28 | 4.59  | 29.52±0.36 | 4.09  | -1.422 |
| MALAT1   | 29665  | 31.12±1.21 | 6.72  | 32.16±0.25 | 6.93  | 1.154  |
| MALL     | 6818   | 26.69±1.37 | 2.10  | 28.18±0.05 | 2.75  | 1.564  |
| MFAP5    | 29673  | 23.16±0.54 | -1.24 | 23.51±0.33 | -1.72 | -1.398 |
| MIDN     | 13824  | 27.03±1.16 | 2.63  | 27.45±0.06 | 2.22  | -1.336 |
| MMP1     | 16298  | 21.72±0.50 | -2.87 | 23.36±0.47 | -2.07 | 1.737  |
| MMS19    | 7155   | 29.47±1.40 | 5.07  | 30.35±0.16 | 5.12  | 1.029  |
| MOXD1    | 21063  | 25.13±1.16 | 0.54  | 26.35±0.26 | 0.92  | 1.300  |
| MT1E     | 7404   | 24.69±0.40 | 0.29  | 24.57±0.37 | -0.66 | -1.932 |
| MT2A     | 7406   | 21.95±0.86 | -2.45 | 21.70±0.29 | -3.54 | -2.126 |
| MUC1     | 7508   | 28.23±1.25 | 3.83  | 29.36±0.27 | 4.13  | 1.234  |
| MYADM    | 7544   | 29.86±1.62 | 5.46  | 30.90±0.25 | 5.67  | 1.154  |
| MYC      | 7553   | 25.92±0.79 | 1.52  | 26.09±0.30 | 0.86  | -1.589 |
| MYL9     | 15754  | 22.20±1.20 | -2.39 | 22.66±0.02 | -2.78 | -1.309 |
| MYLK     | 7590   | 28.38±1.21 | 3.79  | 29.38±0.16 | 3.95  | 1.113  |
| NBL1     | 7650   | 28.14±1.01 | 3.55  | 28.47±0.12 | 3.04  | -1.429 |
| NQO1     | 2874   | 25.00±0.79 | 0.41  | 25.89±0.31 | 0.46  | 1.033  |
| PAM      | 8596   | 23.54±0.31 | -0.86 | 24.07±0.35 | -1.16 | -1.231 |
| PCDH10   | 13404  | 27.62±0.22 | 3.03  | 29.64±0.24 | 4.21  | 2.266  |
| PHGDH    | 8923   | 28.37±1.34 | 3.78  | 28.60±0.34 | 3.17  | -1.523 |
| PIK3IP1  | 24942  | 28.10±1.25 | 3.51  | 29.56±0.04 | 4.13  | 1.537  |
| PLEKHO2  | 30026  | 30.07±1.09 | 5.67  | 30.68±0.13 | 5.45  | -1.171 |
| PLXNB1   | 9103   | 27.29±0.84 | 2.70  | 27.91±0.34 | 2.48  | -1.162 |
| PMP22    | 9118   | 27.08±1.36 | 2.49  | 27.82±0.16 | 2.39  | -1.074 |
| POSTN    | 16953  | 27.19±1.37 | 2.60  | 27.05±0.09 | 1.62  | -1.979 |
| PPP1R3C  | 9293   | 27.36±1.42 | 2.96  | 28.46±0.04 | 3.23  | 1.203  |
| PSG1     | 9514   | 26.44±0.08 | 1.85  | 27.52±0.21 | 2.09  | 1.180  |
| PSG4     | 9521   | 26.62±0.13 | 2.03  | 25.33±0.42 | -0.10 | -4.382 |
| PTGES    | 9599   | 29.47±1.25 | 4.88  | 30.67±0.04 | 5.24  | 1.283  |
| PTGIS    | 9603   | 28.10±1.33 | 3.51  | 26.94±0.07 | 1.51  | -4.009 |
| PTGS1    | 9604   | 28.40±1.23 | 3.81  | 27.85±0.17 | 2.42  | -2.615 |
| QPCT     | 9753   | 28.87±1.01 | 4.47  | 30.69±0.60 | 5.46  | 1.979  |
| RAB3B    | 9778   | 29.81±1.11 | 5.22  | 30.57±0.19 | 5.14  | -1.058 |
| RPL22L1  | 27610  | 33.07±0.32 | 8.48  | 31.71±0.19 | 6.28  | -4.611 |
| RPL36A   | 135255 | 19.97±0.04 | -4.43 | 20.00±0.17 | -5.23 | -1.737 |
| RPS21    | 10409  | 20.74±0.12 | -3.66 | 20.88±0.28 | -4.35 | -1.613 |
| RPS3     | 10420  | 21.59±1.01 | -2.81 | 22.01±0.28 | -3.23 | -1.330 |
| RSPO3    | 20866  | 26.49±0.83 | 2.09  | 27.67±0.12 | 2.44  | 1.273  |
| SERINC2  | 23231  | 30.31±1.58 | 5.72  | 30.65±0.35 | 5.22  | -1.417 |
| SERPINH1 | 1546   | 23.70±1.34 | -0.70 | 24.16±0.02 | -1.08 | -1.300 |
| SFRP4    | 10778  | 29.33±0.62 | 4.74  | 28.61±0.35 | 3.18  | -2.949 |
| SGK1     | 10810  | 24.36±1.25 | -0.04 | 24.73±0.11 | -0.50 | -1.379 |

|           |       |            |       |            |       |         |
|-----------|-------|------------|-------|------------|-------|---------|
| SH3BGR    | 10822 | 29.61±0.27 | 5.02  | 29.66±0.28 | 4.23  | -1.739  |
| SLC16A3   | 10924 | 27.13±1.23 | 2.54  | 27.74±0.21 | 2.31  | -1.173  |
| SLC2A1    | 11005 | 29.72±1.40 | 5.32  | 29.63±0.04 | 4.40  | -1.899  |
| SMAD7     | 6773  | 29.46±1.29 | 4.87  | 29.84±0.18 | 4.41  | -1.384  |
| SOCS1     | 19383 | 28.27±0.38 | 3.87  | 28.51±0.40 | 3.28  | -1.509  |
| SPON2     | 11253 | 26.86±1.08 | 2.27  | 27.43±0.18 | 2.00  | -1.210  |
| STBD1     | 24854 | 27.45±0.71 | 3.05  | 27.95±0.25 | 2.72  | -1.258  |
| STC2      | 11374 | 28.16±1.38 | 3.57  | 28.76±0.10 | 3.33  | -1.181  |
| STMN2     | 10577 | 24.61±0.49 | 0.02  | 23.97±0.31 | -1.46 | -2.796  |
| SYNPO2    | 17732 | 32.79±1.15 | 8.20  | 33.64±0.20 | 8.21  | 1.009   |
| TBX1      | 11592 | 34.10±1.24 | 9.51  | 32.46±0.18 | 7.03  | -5.592  |
| TFPI2     | 11761 | 23.89±0.56 | -0.70 | 25.16±0.46 | -0.28 | 1.343   |
| TGM2      | 11778 | 36.78±1.61 | 12.19 | 36.78±0.16 | 11.35 | -1.786  |
| THBS1     | 11785 | 20.45±1.43 | -3.95 | 21.02±0.07 | -4.21 | -1.195  |
| THBS2     | 11786 | 25.54±0.90 | 0.95  | 25.78±0.08 | 0.35  | -1.519  |
| TM4SF1    | 11853 | 26.38±0.05 | 1.79  | 27.93±0.06 | 2.50  | 1.636   |
| TNFRSF12A | 18152 | 25.03±1.05 | 0.63  | 25.25±0.24 | 0.02  | -1.530  |
| TOB1      | 11979 | 25.05±0.31 | 0.65  | 25.43±0.23 | 0.20  | -1.366  |
| TSC22D3   | 3051  | 29.30±1.44 | 4.90  | 29.00±0.09 | 3.77  | -2.191  |
| UCHL1     | 12513 | 23.26±0.57 | -1.14 | 24.06±0.35 | -1.17 | -1.021  |
| WISP2     | 12770 | 33.59±0.27 | 9.00  | 28.94±0.15 | 3.51  | -45.203 |
| WNT5B     | 16265 | 27.58±1.32 | 2.99  | 27.91±0.21 | 2.48  | -1.429  |
| XG        | 34022 | 27.11±0.38 | 2.52  | 26.83±0.14 | 1.40  | -2.168  |
| ZNF503    | 23589 | 25.21±0.30 | 0.62  | 25.30±0.20 | -0.13 | -1.686  |

**Abbreviations.** SD, standard deviation.

<sup>a</sup> the  $\Delta C_t$  value was calculated as [ $C_t$  of the selected gene -  $C_t$  of the reference genes].

<sup>b</sup> the Fold Change in the TTD pool versus Control pool upon UV-irradiation was calculated as  $2^{-(\Delta C_t \text{ patients} - \Delta C_t \text{ controls})}$  by using the  $2^{-\Delta\Delta C_t}$  method (Livak and Schmittgen, 2001). A Fold Change = 1 indicates no variation in the gene expression between the two pools. Fold Change values > +1 correspond to genes with increased expression in the TTD pool compared to Control pool whereas Fold Change values < -1 correspond to genes with lowered expression in the TTD pool compared to Control pool.

**Table S10.** Expression levels of the 174 deregulated genes in Control-pools in basal condition and after UV, analyzed by RealTime Ready Custom Panels

| Gene Symbol | Source: HGNC Symbol; Acc | Control NT             |                              | Control UV             |                              | Fold Change <sup>b</sup> |
|-------------|--------------------------|------------------------|------------------------------|------------------------|------------------------------|--------------------------|
|             |                          | C <sub>t</sub> Mean±SD | ΔC <sub>t</sub> <sup>a</sup> | C <sub>t</sub> Mean±SD | ΔC <sub>t</sub> <sup>a</sup> |                          |
| ACOT1       | 41                       | 28.53±1.01             | 4.30                         | 29.70±0.20             | 4.27                         | -1.021012126             |
| ADM         | 359                      | 27.50±1.18             | 3.47                         | 28.41±0.20             | 3.18                         | -1.21981864              |
| ADRA2A      | 281                      | 26.64±0.20             | 2.42                         | 27.06±0.21             | 1.63                         | -1.725084064             |
| AHR         | 348                      | 26.13±0.86             | 2.09                         | 27.55±0.14             | 2.32                         | 1.172834949              |
| AKAP2       | 372                      | 23.97±0.79             | -0.07                        | 25.32±0.33             | 0.08                         | 1.110852038              |
| AKR1C2      | 385                      | 25.28±1.17             | 1.25                         | 26.68±0.14             | 1.45                         | 1.15135548               |
| ALDH1A3     | 409                      | 25.95±1.00             | 1.73                         | 27.28±0.08             | 1.85                         | 1.085480142              |
| ALDH1B1     | 407                      | 28.49±1.15             | 4.26                         | 29.55±0.00             | 4.12                         | -1.104454001             |
| ALDH3B1     | 410                      | 28.44±1.03             | 4.21                         | 29.38±0.14             | 3.95                         | -1.200248667             |
| ANGPTL4     | 16039                    | 28.76±0.96             | 4.73                         | 30.10±0.06             | 4.87                         | 1.10063288               |
| ANP32A      | 13233                    | 26.45±0.98             | 2.41                         | 27.58±0.24             | 2.35                         | -1.042465761             |
| ANTXR1      | 21014                    | 24.90±1.01             | 0.87                         | 25.85±0.09             | 0.62                         | -1.190581735             |
| AP000654.2  | -                        | 25.84±0.86             | 1.81                         | 27.23±0.17             | 2.00                         | 1.143402487              |
| AP1S2       | 560                      | 25.62±0.18             | 1.39                         | 26.13±0.31             | 0.70                         | -1.613283518             |
| APBB1IP     | 17379                    | 30.70±1.03             | 6.47                         | 31.94±0.08             | 6.51                         | 1.025741121              |
| ARHGAP23    | 29293                    | 28.58±0.74             | 4.55                         | 30.07±0.02             | 4.84                         | 1.221228644              |
| ASS1        | 758                      | 25.81±1.09             | 1.58                         | 27.33±0.16             | 1.90                         | 1.244011653              |
| ATF5        | 790                      | 26.58±1.20             | 2.36                         | 27.49±0.15             | 2.06                         | -1.232567509             |
| ATP13A3     | 24113                    | 25.44±1.10             | 1.21                         | 27.67±0.14             | 2.24                         | 2.03731162               |
| C14orf4     | -                        | 29.03±1.23             | 4.99                         | 30.64±0.09             | 5.41                         | 1.330221659              |
| C15orf39    | -                        | 28.80±0.68             | 4.76                         | 30.33±0.54             | 5.10                         | 1.258466372              |
| C1orf198    | -                        | 25.33±1.29             | 1.10                         | 27.14±0.20             | 1.71                         | 1.526259209              |
| C4orf49     | -                        | 27.73±0.13             | 3.51                         | 28.22±0.37             | 2.79                         | -1.649086033             |
| C8orf58     | -                        | 27.86±0.75             | 3.82                         | 29.20±0.05             | 3.97                         | 1.103178822              |
| CABLES1     | 25097                    | 31.31±1.14             | 7.28                         | 32.94±0.01             | 7.71                         | 1.34567809               |
| CAMK2N1     | 24190                    | 32.33±0.54             | 8.10                         | 33.17±0.70             | 7.74                         | -1.28788163              |
| CCDC8       | 25367                    | 27.06±0.57             | 3.03                         | 28.57±0.37             | 3.34                         | 1.242575344              |
| CCRL1       | 1611                     | 24.66±0.51             | 0.62                         | 25.51±0.34             | 0.28                         | -1.265756594             |
| CLEC3B      | 11891                    | 28.53±1.25             | 4.31                         | 29.64±0.23             | 4.21                         | -1.073012339             |
| CLGN        | 2060                     | 30.04±0.23             | 5.82                         | 30.56±0.35             | 5.13                         | -1.609560345             |
| CLIC3       | 2064                     | 32.91±1.64             | 8.68                         | 34.20±0.08             | 8.77                         | 1.064370182              |
| CLU         | 2095                     | 22.53±1.19             | -1.70                        | 23.83±0.21             | -1.61                        | 1.068065408              |
| CNN1        | 2155                     | 28.55±1.32             | 4.51                         | 29.35±0.16             | 4.12                         | -1.317984436             |
| COL4A1      | 2202                     | 28.94±0.88             | 4.72                         | 30.21±0.13             | 4.78                         | 1.044877153              |
| CRABP2      | 2339                     | 24.48±1.16             | 0.26                         | 25.74±0.25             | 0.31                         | 1.034069629              |
| CRLF1       | 2364                     | 27.17±1.27             | 2.94                         | 28.34±0.32             | 2.91                         | -1.026926789             |
| CRYAB       | 2389                     | 30.08±0.55             | 5.85                         | 30.79±0.33             | 5.36                         | -1.409320755             |
| CRYZ        | 2419                     | 30.63±0.54             | 6.40                         | 31.75±0.61             | 6.32                         | -1.059463094             |
| CSRP2       | 2470                     | 25.60±0.61             | 1.37                         | 26.68±0.53             | 1.25                         | -1.093030254             |
| CTGF        | 2500                     | 22.58±0.68             | -1.46                        | 23.77±0.14             | -1.46                        | -1                       |
| CTSC        | 2528                     | 26.65±0.90             | 2.61                         | 27.70±0.38             | 2.47                         | -1.104454001             |
| CTSK        | 2536                     | 22.24±0.99             | -1.80                        | 23.42±0.16             | -1.82                        | -1.012788784             |
| CYR61       | 2654                     | 21.19±1.04             | -2.85                        | 21.64±0.13             | -3.60                        | -1.675974269             |
| DCAF4       | 20229                    | 29.15±1.33             | 5.11                         | 30.82±0.13             | 5.59                         | 1.394743666              |
| DDIT3       | 2726                     | 26.65±0.58             | 2.61                         | 27.56±0.29             | 2.33                         | -1.221228644             |
| DDIT4       | 24944                    | 28.07±0.91             | 4.03                         | 29.02±0.12             | 3.79                         | -1.187834082             |

|           |       |            |       |            |       |              |
|-----------|-------|------------|-------|------------|-------|--------------|
| DNAJB1    | 5270  | 28.70±1.05 | 4.66  | 29.43±0.22 | 4.20  | -1.383510251 |
| DPP4      | 3009  | 25.19±1.01 | 0.96  | 26.45±0.17 | 1.02  | 1.042465761  |
| DSP       | 3052  | 25.96±0.84 | 1.73  | 27.77±0.13 | 2.34  | 1.522736872  |
| DUSP1     | 3064  | 23.48±1.08 | -0.56 | 24.14±0.30 | -1.10 | -1.452293792 |
| EGR1      | 3238  | 24.88±0.92 | 0.84  | 24.37±0.14 | -0.86 | -3.249009585 |
| EIF4EBP1  | 3288  | 24.92±1.02 | 0.89  | 25.98±0.24 | 0.75  | -1.099362113 |
| EPDR1     | 17572 | 26.76±1.00 | 2.53  | 27.86±0.23 | 2.43  | -1.07549439  |
| EPS8L2    | 21296 | 30.06±0.87 | 6.02  | 30.66±0.11 | 5.43  | -1.505246747 |
| F2R       | 3537  | 27.15±1.14 | 2.92  | 28.63±0.19 | 3.20  | 1.209994089  |
| FAM118A   | 1313  | 29.76±0.82 | 5.73  | 31.03±0.01 | 5.80  | 1.048504704  |
| FAM43A    | 26888 | 24.32±0.47 | 0.28  | 24.76±0.24 | -0.47 | -1.68568309  |
| FBXO32    | 16731 | 28.20±0.95 | 4.16  | 29.79±0.07 | 4.56  | 1.316462719  |
| FGF7      | 3685  | 22.38±0.39 | -1.85 | 23.69±0.48 | -1.74 | 1.079228237  |
| FNDC4     | 20239 | 28.56±1.28 | 4.34  | 29.82±0.28 | 4.39  | 1.037659659  |
| FOSB      | 3797  | 28.95±0.70 | 4.91  | 28.88±0.05 | 3.65  | -2.403272099 |
| FOXO3     | 3821  | 31.50±1.25 | 7.46  | 33.53±0.11 | 8.30  | 1.779740212  |
| GADD45A   | 4095  | 28.10±0.93 | 4.06  | 28.11±0.15 | 2.88  | -2.27889323  |
| GADD45B   | 4096  | 31.53±1.31 | 7.50  | 31.55±0.62 | 6.32  | -2.260538779 |
| GALNTL2   | 21531 | 27.82±0.98 | 3.59  | 29.06±0.33 | 3.63  | 1.025741121  |
| GAS1      | 4165  | 27.02±1.04 | 2.98  | 28.47±0.32 | 3.24  | 1.190581735  |
| GAS5      | 10183 | 32.24±0.70 | 8.02  | 31.37±0.23 | 5.94  | -4.218314518 |
| GAS6      | 4168  | 24.24±1.34 | 0.01  | 25.50±0.18 | 0.07  | 1.0364616    |
| GDF15     | 30142 | 34.02±1.21 | 9.98  | 34.16±0.12 | 8.93  | -2.077718207 |
| GDF6      | 4221  | 30.88±0.85 | 6.84  | 32.51±0.04 | 7.28  | 1.348790861  |
| GLRX      | 4330  | 25.16±0.31 | 1.13  | 25.72±0.20 | 0.49  | -1.554732811 |
| GNG11     | 4403  | 33.59±0.13 | 9.36  | 33.89±0.24 | 8.46  | -1.870382496 |
| GPX3      | 4555  | 34.66±1.34 | 10.43 | 35.95±0.00 | 10.52 | 1.064370182  |
| GYPC      | 4704  | 27.79±1.01 | 3.57  | 28.81±0.16 | 3.38  | -1.138131035 |
| HAND2     | 4808  | 28.15±1.05 | 3.93  | 29.48±0.47 | 4.05  | 1.089248656  |
| HAPLN3    | 21446 | 28.67±1.19 | 4.44  | 30.11±0.14 | 4.68  | 1.180992661  |
| HERPUD1   | 13744 | 28.03±0.87 | 3.99  | 30.25±0.85 | 5.02  | 2.03731162   |
| HIST2H2BE | 4760  | 26.45±0.79 | 2.41  | 27.82±0.09 | 2.59  | 1.126358954  |
| HMOX1     | 5013  | 24.43±1.27 | 0.40  | 26.27±0.04 | 1.04  | 1.556529946  |
| HNRNPA1   | 5031  | 27.86±0.43 | 3.82  | 28.74±0.23 | 3.51  | -1.2397077   |
| HOXB7     | 5118  | 33.62±1.11 | 9.58  | 37.43±3.64 | 12.20 | 6.126231988  |
| HOXC10    | 5122  | 28.68±1.20 | 4.45  | 30.04±0.21 | 4.61  | 1.113421618  |
| HOXC9     | 5130  | 29.84±1.08 | 5.61  | 30.85±0.16 | 5.42  | -1.144724161 |
| HSD3B7    | 18324 | 26.84±0.80 | 2.61  | 27.67±0.29 | 2.24  | -1.296839555 |
| HSPA2     | 5235  | 26.71±0.43 | 2.67  | 27.17±0.40 | 1.94  | -1.658639092 |
| HSPB7     | 5249  | 25.49±0.94 | 1.27  | 26.49±0.20 | 1.06  | -1.154018752 |
| ID1       | 5360  | 21.12±0.11 | -2.91 | 21.16±0.06 | -4.08 | -2.237157249 |
| ID3       | 5362  | 23.38±1.12 | -0.65 | 24.90±0.15 | -0.34 | 1.246889254  |
| IER3      | 5392  | 22.80±1.07 | -1.23 | 22.90±0.12 | -2.34 | -2.146024679 |
| IGFBP4    | 5473  | 25.11±0.46 | 0.88  | 25.83±0.22 | 0.40  | -1.399585866 |
| IL13RA2   | 5975  | 26.26±0.30 | 2.04  | 26.89±0.11 | 1.46  | -1.496577164 |
| IL20RB    | 6004  | 27.78±1.10 | 3.55  | 28.95±0.21 | 3.52  | -1.026926789 |
| IL6       | 6018  | 27.53±0.77 | 3.49  | 28.39±0.28 | 3.16  | -1.261377409 |
| IRF2BP2   | 21729 | 26.27±1.01 | 2.23  | 27.53±0.19 | 2.30  | 1.04367076   |
| IRS2      | 6126  | 24.69±0.52 | 0.66  | 25.85±0.36 | 0.62  | -1.029302237 |
| JUN       | 6204  | 25.03±0.23 | 0.99  | 25.86±0.26 | 0.63  | -1.28788163  |
| JUND      | 6206  | 31.08±0.60 | 7.04  | 31.27±0.03 | 6.04  | -2           |
| KCNE4     | 6244  | 32.62±1.26 | 8.58  | 32.50±0.06 | 7.27  | -2.493778507 |



|          |        |            |       |            |       |              |
|----------|--------|------------|-------|------------|-------|--------------|
| KRT34    | 6452   | 27.99±1.00 | 3.95  | 28.82±0.08 | 3.59  | -1.283425898 |
| KRTAP1-5 | 16777  | 26.86±1.17 | 2.63  | 28.05±0.18 | 2.62  | -1.00695555  |
| LBH      | 29532  | 25.08±1.04 | 1.04  | 26.97±0.23 | 1.74  | 1.620755722  |
| LDOC1    | 6548   | 29.76±1.06 | 5.53  | 30.64±0.25 | 5.21  | -1.248330549 |
| LGALS3BP | 6564   | 27.65±1.22 | 3.43  | 28.67±0.17 | 3.24  | -1.138131035 |
| LGR4     | 13299  | 27.39±1.28 | 3.35  | 28.96±0.03 | 3.73  | 1.298338588  |
| LIF      | 6596   | 25.88±0.79 | 1.85  | 27.55±0.05 | 2.32  | 1.383510251  |
| LMCD1    | 6633   | 24.32±1.15 | 0.28  | 26.43±0.23 | 1.20  | 1.881217511  |
| LMO7     | 6646   | 22.30±0.57 | -1.92 | 23.77±0.44 | -1.66 | 1.200248667  |
| LRRC15   | 20818  | 26.69±1.25 | 2.47  | 27.96±0.18 | 2.53  | 1.044877153  |
| LRRC32   | 4161   | 28.07±0.98 | 3.85  | 29.52±0.36 | 4.09  | 1.179629113  |
| MALAT1   | 29665  | 31.77±1.04 | 7.73  | 32.16±0.25 | 6.93  | -1.745128575 |
| MALL     | 6818   | 26.72±1.36 | 2.49  | 28.18±0.05 | 2.75  | 1.193335743  |
| MFAP5    | 29673  | 22.56±0.48 | -1.48 | 23.51±0.33 | -1.72 | -1.183724489 |
| MIDN     | 13824  | 25.99±0.95 | 1.96  | 27.45±0.06 | 2.22  | 1.196096122  |
| MMP1     | 16298  | 22.51±0.55 | -1.72 | 23.36±0.47 | -2.07 | -1.274560627 |
| MMS19    | 7155   | 29.03±1.14 | 4.99  | 30.35±0.16 | 5.12  | 1.090507733  |
| MOXD1    | 21063  | 25.06±1.02 | 0.83  | 26.35±0.26 | 0.92  | 1.060687741  |
| MT1E     | 7404   | 24.24±0.43 | 0.20  | 24.57±0.37 | -0.66 | -1.815038311 |
| MT2A     | 7406   | 21.00±0.82 | -3.04 | 21.70±0.29 | -3.54 | -1.412580742 |
| MUC1     | 7508   | 28.16±1.13 | 4.13  | 29.36±0.27 | 4.13  | 1.002313162  |
| MYADM    | 7544   | 28.87±1.43 | 4.83  | 30.90±0.25 | 5.67  | 1.785919022  |
| MYC      | 7553   | 25.46±0.71 | 1.42  | 26.09±0.30 | 0.86  | -1.479387509 |
| MYL9     | 15754  | 21.59±1.22 | -2.63 | 22.66±0.02 | -2.78 | -1.103178822 |
| MYLK     | 7590   | 28.25±0.95 | 4.02  | 29.38±0.16 | 3.95  | -1.055797631 |
| NBL1     | 7650   | 27.71±0.72 | 3.48  | 28.47±0.12 | 3.04  | -1.361314116 |
| NQO1     | 2874   | 24.87±0.82 | 0.64  | 25.89±0.31 | 0.46  | -1.135504429 |
| PAM      | 8596   | 23.34±0.35 | -0.70 | 24.07±0.35 | -1.16 | -1.375541818 |
| PCDH10   | 13404  | 28.82±0.25 | 4.59  | 29.64±0.24 | 4.21  | -1.301341855 |
| PHGDH    | 8923   | 27.36±1.41 | 3.14  | 28.60±0.34 | 3.17  | 1.023373892  |
| PIK3IP1  | 24942  | 28.80±1.21 | 4.58  | 29.56±0.04 | 4.13  | -1.362887677 |
| PLEKHO2  | 30026  | 29.38±0.75 | 5.34  | 30.68±0.13 | 5.45  | 1.07549439   |
| PLXNB1   | 9103   | 26.91±0.82 | 2.69  | 27.91±0.34 | 2.48  | -1.154018752 |
| PMP22    | 9118   | 26.12±1.11 | 1.89  | 27.82±0.16 | 2.39  | 1.414213562  |
| POSTN    | 16953  | 25.52±1.05 | 1.29  | 27.05±0.09 | 1.62  | 1.24977351   |
| PPP1R3C  | 9293   | 27.14±1.17 | 3.11  | 28.46±0.04 | 3.23  | 1.089248656  |
| PSG1     | 9514   | 27.29±0.19 | 3.06  | 27.52±0.21 | 2.09  | -1.970188043 |
| PSG4     | 9521   | 25.10±0.17 | 0.88  | 25.33±0.42 | -0.10 | -1.974745407 |
| PTGES    | 9599   | 29.18±1.12 | 4.96  | 30.67±0.04 | 5.24  | 1.217003514  |
| PTGIS    | 9603   | 25.79±1.15 | 1.56  | 26.94±0.07 | 1.51  | -1.035264924 |
| PTGS1    | 9604   | 26.75±1.21 | 2.52  | 27.85±0.17 | 2.42  | -1.074252648 |
| QPCT     | 9753   | 29.08±0.88 | 5.04  | 30.69±0.60 | 5.46  | 1.330221659  |
| RAB3B    | 9778   | 29.22±0.89 | 4.99  | 30.57±0.19 | 5.14  | 1.105730653  |
| RPL22L1  | 27610  | 31.26±0.17 | 7.04  | 31.71±0.19 | 6.28  | -1.695448152 |
| RPL36A   | 135255 | 19.94±0.07 | -4.09 | 20.00±0.17 | -5.23 | -2.198724227 |
| RPS21    | 10409  | 20.68±0.13 | -3.36 | 20.88±0.28 | -4.35 | -1.990779358 |
| RPS3     | 10420  | 21.24±0.84 | -2.80 | 22.01±0.28 | -3.23 | -1.34567809  |
| RSPO3    | 20866  | 26.30±0.83 | 2.26  | 27.67±0.12 | 2.44  | 1.126358954  |
| SERINC2  | 23231  | 29.27±1.30 | 5.04  | 30.65±0.35 | 5.22  | 1.132883885  |
| SERPINH1 | 1546   | 22.92±1.24 | -1.12 | 24.16±0.02 | -1.08 | 1.031683179  |
| SFRP4    | 10778  | 27.68±0.55 | 3.45  | 28.61±0.35 | 3.18  | -1.205807828 |
| SGK1     | 10810  | 23.69±1.03 | -0.34 | 24.73±0.11 | -0.50 | -1.114708637 |

|           |       |            |       |            |       |              |
|-----------|-------|------------|-------|------------|-------|--------------|
| SH3BGR    | 10822 | 29.12±0.43 | 4.89  | 29.66±0.28 | 4.23  | -1.589235949 |
| SLC16A3   | 10924 | 26.54±1.33 | 2.32  | 27.74±0.21 | 2.31  | -1.004631674 |
| SLC2A1    | 11005 | 28.15±1.24 | 4.12  | 29.63±0.04 | 4.40  | 1.212793001  |
| SMAD7     | 6773  | 26.66±1.23 | 2.43  | 29.84±0.18 | 4.41  | 3.931282394  |
| SOCS1     | 19383 | 29.29±0.27 | 5.25  | 28.51±0.40 | 3.28  | -3.926743421 |
| SPON2     | 11253 | 26.53±1.13 | 2.30  | 27.43±0.18 | 2.00  | -1.235418637 |
| STBD1     | 24854 | 26.61±0.69 | 2.57  | 27.95±0.25 | 2.72  | 1.105730653  |
| STC2      | 11374 | 27.65±1.22 | 3.43  | 28.76±0.10 | 3.33  | -1.069299999 |
| STMN2     | 10577 | 23.08±0.61 | -1.15 | 23.97±0.31 | -1.46 | -1.242575344 |
| SYNPO2    | 17732 | 32.53±1.00 | 8.30  | 33.64±0.20 | 8.21  | -1.064370182 |
| TBX1      | 11592 | 31.17±0.92 | 6.95  | 32.46±0.18 | 7.03  | 1.059463094  |
| TFPI2     | 11761 | 24.28±0.39 | 0.06  | 25.16±0.46 | -0.28 | -1.258466372 |
| TGM2      | 11778 | 35.15±1.51 | 10.92 | 36.78±0.16 | 11.35 | 1.3441244    |
| THBS1     | 11785 | 19.48±1.25 | -4.56 | 21.02±0.07 | -4.21 | 1.274560627  |
| THBS2     | 11786 | 24.77±0.83 | 0.54  | 25.78±0.08 | 0.35  | -1.140763716 |
| TM4SF1    | 11853 | 27.42±0.21 | 3.19  | 27.93±0.06 | 2.50  | -1.613283518 |
| TNFRSF12A | 18152 | 24.29±0.93 | 0.25  | 25.25±0.24 | 0.02  | -1.175547906 |
| TOB1      | 11979 | 25.47±0.30 | 1.43  | 25.43±0.23 | 0.20  | -2.351095813 |
| TSC22D3   | 3051  | 28.43±1.28 | 4.39  | 29.00±0.09 | 3.77  | -1.542210825 |
| UCHL1     | 12513 | 23.48±0.38 | -0.56 | 24.06±0.35 | -1.17 | -1.526259209 |
| WISP2     | 12770 | 28.76±0.20 | 4.53  | 28.94±0.15 | 3.51  | -2.039666575 |
| WNT5B     | 16265 | 26.50±1.19 | 2.27  | 27.91±0.21 | 2.48  | 1.15002615   |
| XG        | 34022 | 26.16±0.43 | 1.93  | 26.83±0.14 | 1.40  | -1.443929196 |
| ZNF503    | 23589 | 24.76±0.25 | 0.53  | 25.30±0.20 | -0.13 | -1.583737611 |

**Abbreviations.** SD, standard deviation.

<sup>a</sup> the  $\Delta C_t$  value was calculated as [ $C_t$  of the selected gene -  $C_t$  of the reference genes].

<sup>b</sup> the Fold Change of the Control pool in basal condition versus UV irradiation was calculated as  $2^{-(\Delta C_t \text{ patients} - \Delta C_t \text{ controls})}$  by using the  $2^{-\Delta\Delta C_t}$  method (Livak and Schmittgen, 2001). A Fold Change = 1 indicates no variation in the gene expression between the two pools. Fold Change values > +1 correspond to genes with increased expression whereas Fold Change values < -1 correspond to genes with lowered expression.

**Table S11.** Expression levels of the 174 deregulated genes in TTD in basal condition and after UV, analyzed by RealTime Ready Custom Panel

| Gene Symbol | Source: HGNC Symbol; Acc | TTD patients nt        |                              | TTD patients uv        |                              | Fold Change <sup>b</sup> |
|-------------|--------------------------|------------------------|------------------------------|------------------------|------------------------------|--------------------------|
|             |                          | C <sub>t</sub> Mean±SD | ΔC <sub>t</sub> <sup>a</sup> | C <sub>t</sub> Mean±SD | ΔC <sub>t</sub> <sup>a</sup> |                          |
| ACOT1       | 41                       | 29.86±0.10             | 4.45                         | 28.77±1.17             | 3.91                         | -1.452                   |
| ADM         | 359                      | 21.63±0.14             | 3.17                         | 27.48±1.13             | 3.08                         | -1.058                   |
| ADRA2A      | 281                      | 28.28±0.24             | 1.32                         | 26.34±0.18             | 1.47                         | 1.113                    |
| AHR         | 348                      | 26.17±0.40             | 2.45                         | 26.86±1.13             | 2.46                         | 1.013                    |
| AKAP2       | 372                      | 25.57±0.08             | 0.18                         | 24.85±0.95             | 0.45                         | 1.203                    |
| AKR1C2      | 385                      | 24.79±0.05             | 1.90                         | 25.74±1.17             | 1.34                         | -1.466                   |
| ALDH1A3     | 409                      | 33.13±0.03             | 1.69                         | 26.47±1.10             | 1.61                         | -1.059                   |
| ALDH1B1     | 407                      | 24.57±0.16             | 4.73                         | 29.76±1.29             | 4.89                         | 1.121                    |
| ALDH3B1     | 410                      | 36.44±0.32             | 4.29                         | 28.61±1.25             | 3.74                         | -1.456                   |
| ANGPTL4     | 16039                    | 24.69±0.49             | 4.62                         | 30.83±1.06             | 6.43                         | 3.515                    |
| ANP32A      | 13233                    | 25.86±0.13             | 2.53                         | 26.69±1.09             | 2.29                         | -1.178                   |
| ANTXR1      | 21014                    | 30.41±0.36             | 0.96                         | 25.31±1.11             | 0.91                         | -1.033                   |
| AP000654.2  | -                        | 28.17±0.52             | 2.31                         | 26.36±1.16             | 1.96                         | -1.275                   |
| AP1S2       | 560                      | 19.96±0.00             | 0.70                         | 25.82±0.11             | 0.95                         | 1.192                    |
| APBB1IP     | 17379                    | 32.68±0.06             | 7.93                         | 32.36±1.37             | 7.49                         | -1.352                   |
| ARHGAP23    | 29293                    | 27.24±0.01             | 3.74                         | 28.37±1.12             | 3.97                         | 1.177                    |
| ASS1        | 758                      | 20.89±0.19             | 1.40                         | 25.82±1.24             | 0.96                         | -1.355                   |
| ATF5        | 790                      | 33.51±0.00             | 3.25                         | 27.57±1.30             | 2.70                         | -1.461                   |
| ATP13A3     | 24113                    | 26.22±0.04             | 1.98                         | 27.38±1.33             | 2.51                         | 1.447                    |
| C14orf4     | -                        | 23.41±0.11             | 5.74                         | 29.94±1.53             | 5.54                         | -1.147                   |
| C15orf39    | -                        | 29.95±0.01             | 5.17                         | 30.43±0.76             | 6.03                         | 1.817                    |
| C1orf198    | -                        | 26.41±0.01             | 1.25                         | 26.05±1.42             | 1.19                         | -1.041                   |
| C4orf49     | -                        | 35.58±0.21             | 2.71                         | 27.83±0.13             | 2.96                         | 1.189                    |
| C8orf58     | -                        | 29.36±0.30             | 4.12                         | 29.08±0.84             | 4.68                         | 1.471                    |
| CABLES1     | 25097                    | 27.41±0.14             | 7.38                         | 31.84±1.26             | 7.44                         | 1.045                    |
| CAMK2N1     | 24190                    | 20.77±0.16             | 7.82                         | 33.13±0.49             | 8.26                         | 1.364                    |
| CCDC8       | 25367                    | 33.25±0.32             | 2.93                         | 28.17±0.48             | 3.77                         | 1.800                    |
| CCRL1       | 1611                     | 30.98±0.13             | -0.57                        | 23.86±0.58             | -0.54                        | 1.020                    |
| CLEC3B      | 11891                    | 27.56±0.11             | 3.83                         | 28.14±1.32             | 3.27                         | -1.469                   |
| CLGN        | 2060                     | 27.44±0.16             | 4.11                         | 29.30±0.33             | 4.43                         | 1.251                    |
| CLIC3       | 2064                     | 30.34±0.86             | 9.56                         | 33.87±1.61             | 9.00                         | -1.474                   |
| CLU         | 2095                     | 27.76±0.23             | -0.25                        | 24.09±1.25             | -0.78                        | -1.441                   |
| CNN1        | 2155                     | 28.15±0.04             | 4.27                         | 28.55±1.25             | 4.15                         | -1.087                   |
| COL4A1      | 2202                     | 23.73±0.23             | 4.63                         | 29.84±1.16             | 4.97                         | 1.266                    |
| CRABP2      | 2339                     | 25.87±0.24             | -0.42                        | 23.85±1.20             | -1.02                        | -1.512                   |
| CRLF1       | 2364                     | 33.28±0.10             | 3.42                         | 28.03±1.52             | 3.16                         | -1.193                   |
| CRYAB       | 2389                     | 30.06±0.13             | 4.91                         | 30.21±0.36             | 5.34                         | 1.350                    |
| CRYZ        | 2419                     | 24.05±0.36             | 6.32                         | 30.87±0.74             | 6.00                         | -1.248                   |
| CSRP2       | 2470                     | 27.55±0.04             | 3.10                         | 27.28±0.70             | 2.42                         | -1.606                   |
| CTGF        | 2500                     | 30.91±0.05             | -0.56                        | 24.72±0.83             | 0.32                         | 1.834                    |
| CTSC        | 2528                     | 29.54±0.25             | 2.34                         | 26.50±0.99             | 2.10                         | -1.178                   |
| CTSK        | 2536                     | 24.14±0.25             | -1.37                        | 22.72±1.09             | -1.68                        | -1.240                   |
| CYR61       | 2654                     | 29.72±0.08             | -2.42                        | 21.75±1.21             | -2.65                        | -1.170                   |
| DCAF4       | 20229                    | 28.81±0.13             | 5.67                         | 30.39±1.40             | 5.99                         | 1.253                    |
| DDIT3       | 2726                     | 26.57±0.30             | 3.44                         | 27.69±0.77             | 3.29                         | -1.112                   |

|           |       |            |       |            |       |        |
|-----------|-------|------------|-------|------------|-------|--------|
| DDIT4     | 24944 | 25.83±0.14 | 4.12  | 27.70±1.00 | 3.30  | -1.759 |
| DNAJB1    | 5270  | 25.42±0.18 | 4.65  | 28.79±1.18 | 4.39  | -1.195 |
| DPP4      | 3009  | 28.03±0.21 | 1.81  | 26.21±1.26 | 1.35  | -1.374 |
| DSP       | 3052  | 25.52±0.11 | 2.49  | 27.43±1.25 | 2.57  | 1.055  |
| DUSP1     | 3064  | 25.62±0.01 | -0.44 | 23.56±1.27 | -0.84 | -1.323 |
| EGR1      | 3238  | 26.13±0.33 | 0.88  | 24.55±1.15 | 0.15  | -1.662 |
| EIF4EBP1  | 3288  | 28.14±0.11 | 2.00  | 26.09±1.08 | 1.69  | -1.240 |
| EPDR1     | 17572 | 30.67±0.11 | 3.00  | 27.48±1.16 | 2.62  | -1.300 |
| EPS8L2    | 21296 | 26.94±0.15 | 5.65  | 29.93±1.15 | 5.53  | -1.083 |
| F2R       | 3537  | 25.65±0.27 | 3.72  | 28.21±1.42 | 3.34  | -1.294 |
| FAM118A   | 1313  | 28.98±0.11 | 5.74  | 30.58±0.85 | 6.18  | 1.360  |
| FAM43A    | 26888 | 25.35±0.35 | -0.67 | 24.72±0.43 | 0.32  | 1.982  |
| FBXO32    | 16731 | 26.42±0.14 | 5.01  | 29.58±1.20 | 5.18  | 1.128  |
| FGF7      | 3685  | 30.25±0.04 | -2.02 | 23.48±0.54 | -1.39 | 1.551  |
| FNDC4     | 20239 | 30.16±0.21 | 4.47  | 28.71±1.47 | 3.84  | -1.539 |
| FOSB      | 3797  | 27.58±0.11 | 4.02  | 28.25±1.06 | 3.85  | -1.119 |
| FOXO3     | 3821  | 26.75±0.21 | 7.44  | 32.68±1.42 | 8.28  | 1.796  |
| GADD45A   | 4095  | 26.16±0.11 | 4.84  | 28.24±1.05 | 3.84  | -1.988 |
| GADD45B   | 4096  | 27.53±0.06 | 7.82  | 32.24±1.35 | 7.84  | 1.014  |
| GALNTL2   | 21531 | 28.08±0.19 | 4.72  | 29.21±1.17 | 4.34  | -1.297 |
| GAS1      | 4165  | 31.15±0.15 | 3.34  | 27.35±1.17 | 2.95  | -1.307 |
| GAS5      | 10183 | 26.01±0.20 | 8.55  | 31.61±0.74 | 6.74  | -3.498 |
| GAS6      | 4168  | 30.23±0.09 | 0.23  | 24.65±1.49 | -0.22 | -1.366 |
| GDF15     | 30142 | 27.92±0.13 | 11.24 | 33.95±1.26 | 9.55  | -3.234 |
| GDF6      | 4221  | 23.94±0.30 | 10.34 | 35.33±1.00 | 10.93 | 1.507  |
| GLRX      | 4330  | 32.62±0.00 | 0.63  | 25.39±0.32 | 0.99  | 1.280  |
| GNG11     | 4403  | 22.73±0.20 | 7.70  | 33.55±0.22 | 8.69  | 1.982  |
| GPX3      | 4555  | 29.32±0.05 | 12.26 | 36.61±1.58 | 11.74 | -1.426 |
| GYPC      | 4704  | 27.29±0.06 | 4.12  | 28.62±1.31 | 3.76  | -1.286 |
| HAND2     | 4808  | 26.80±0.19 | 5.50  | 29.92±1.04 | 5.05  | -1.361 |
| HAPLN3    | 21446 | 24.68±0.15 | 5.72  | 30.71±1.25 | 5.84  | 1.091  |
| HERPUD1   | 13744 | 33.06±0.57 | 6.45  | 30.02±1.30 | 5.62  | -1.778 |
| HIST2H2BE | 4760  | 27.69±0.02 | 2.34  | 26.90±1.23 | 2.50  | 1.119  |
| HMOX1     | 5013  | 30.18±0.18 | 0.98  | 26.02±1.28 | 1.62  | 1.562  |
| HNRNPA1   | 5031  | 28.18±0.13 | 4.01  | 28.32±0.54 | 3.92  | -1.058 |
| HOXB7     | 5118  | 34.70±0.57 | 11.30 | 34.71±0.98 | 10.31 | -1.991 |
| HOXC10    | 5122  | 31.63±0.06 | 3.39  | 27.66±1.14 | 2.80  | -1.509 |
| HOXC9     | 5130  | 27.74±0.05 | 5.59  | 29.62±0.94 | 4.76  | -1.782 |
| HSD3B7    | 18324 | 26.20±0.04 | 3.03  | 27.27±0.93 | 2.40  | -1.542 |
| HSPA2     | 5235  | 26.68±0.05 | 1.18  | 25.76±0.37 | 1.36  | 1.130  |
| HSPB7     | 5249  | 30.44±0.13 | 1.37  | 26.27±1.13 | 1.41  | 1.029  |
| ID1       | 5360  | 29.25±0.49 | -3.61 | 22.57±0.06 | -1.83 | 3.426  |
| ID3       | 5362  | 28.41±0.21 | -0.46 | 24.97±1.18 | 0.57  | 2.030  |
| IER3      | 5392  | 27.12±0.06 | -0.35 | 23.34±1.22 | -1.06 | -1.638 |
| IGFBP4    | 5473  | 33.46±0.16 | 0.73  | 25.73±0.98 | 0.87  | 1.103  |
| IL13RA2   | 5975  | 30.89±0.29 | 0.40  | 25.54±0.28 | 0.68  | 1.211  |
| IL20RB    | 6004  | 29.51±0.21 | 6.59  | 30.70±1.36 | 5.83  | -1.693 |
| IL6       | 6018  | 23.73±0.25 | 4.20  | 27.68±1.09 | 3.28  | -1.888 |
| IRF2BP2   | 21729 | 28.85±0.27 | 2.00  | 27.14±1.24 | 2.74  | 1.674  |
| IRS2      | 6126  | 28.68±0.21 | 1.33  | 26.01±0.55 | 1.61  | 1.214  |
| JUN       | 6204  | 29.90±0.21 | 0.92  | 26.81±0.12 | 2.41  | 2.793  |
| JUND      | 6206  | 29.26±0.09 | 6.39  | 30.75±0.92 | 6.35  | -1.026 |

|          |        |            |       |            |       |        |
|----------|--------|------------|-------|------------|-------|--------|
| KCNE4    | 6244   | 22.46±0.17 | 8.45  | 31.86±1.38 | 7.46  | -1.984 |
| KRT34    | 6452   | 27.45±0.10 | 4.08  | 28.52±1.20 | 4.12  | 1.032  |
| KRTAP1-5 | 16777  | 30.98±0.01 | 2.43  | 26.70±1.29 | 1.83  | -1.516 |
| LBH      | 29532  | 30.10±0.10 | 2.31  | 27.03±1.14 | 2.63  | 1.253  |
| LDOC1    | 6548   | 22.82±0.16 | 5.33  | 29.77±1.14 | 4.90  | -1.339 |
| LGALS3BP | 6564   | 29.17±0.27 | 4.12  | 28.67±1.28 | 3.80  | -1.244 |
| LGR4     | 13299  | 22.66±0.06 | 2.91  | 27.72±1.41 | 3.32  | 1.326  |
| LIF      | 6596   | 27.77±0.08 | 2.32  | 27.16±1.19 | 2.76  | 1.358  |
| LMCD1    | 6633   | 27.58±0.07 | 0.62  | 25.89±1.28 | 1.49  | 1.834  |
| LMO7     | 6646   | 24.78±0.01 | -1.70 | 23.04±0.59 | -1.83 | -1.094 |
| LRRC15   | 20818  | 28.85±0.11 | 3.79  | 28.31±1.45 | 3.44  | -1.270 |
| LRRC32   | 4161   | 29.89±0.11 | 4.47  | 29.18±1.28 | 4.32  | -1.112 |
| MALAT1   | 29665  | 27.69±0.08 | 7.48  | 31.12±1.21 | 6.72  | -1.684 |
| MALL     | 6818   | 30.41±0.11 | 2.02  | 26.69±1.37 | 1.82  | -1.146 |
| MFAP5    | 29673  | 31.18±0.36 | -1.31 | 23.16±0.54 | -1.24 | 1.049  |
| MIDN     | 13824  | 27.24±0.08 | 2.20  | 27.03±1.16 | 2.63  | 1.355  |
| MMP1     | 16298  | 23.87±0.10 | -2.97 | 21.72±0.50 | -3.14 | -1.128 |
| MMS19    | 7155   | 28.07±0.08 | 4.99  | 29.47±1.40 | 5.07  | 1.063  |
| MOXD1    | 21063  | 29.55±0.06 | 0.68  | 25.13±1.16 | 0.26  | -1.333 |
| MT1E     | 7404   | 31.02±0.21 | 0.11  | 24.69±0.40 | 0.29  | 1.133  |
| MT2A     | 7406   | 27.97±0.06 | -2.51 | 21.95±0.86 | -2.45 | 1.045  |
| MUC1     | 7508   | 31.75±0.14 | 4.29  | 28.23±1.25 | 3.83  | -1.379 |
| MYADM    | 7544   | 29.22±0.16 | 5.78  | 29.86±1.62 | 5.46  | -1.245 |
| MYC      | 7553   | 27.55±0.08 | 1.89  | 25.92±0.79 | 1.52  | -1.285 |
| MYL9     | 15754  | 29.02±0.17 | -2.29 | 22.20±1.20 | -2.66 | -1.295 |
| MYLK     | 7590   | 27.13±0.21 | 3.74  | 28.38±1.21 | 3.51  | -1.170 |
| NBL1     | 7650   | 29.55±0.01 | 3.42  | 28.14±1.01 | 3.27  | -1.107 |
| NQO1     | 2874   | 29.15±0.12 | 0.55  | 25.00±0.79 | 0.14  | -1.332 |
| PAM      | 8596   | 23.14±0.03 | -1.20 | 23.54±0.31 | -0.86 | 1.261  |
| PCDH10   | 13404  | 30.15±0.05 | 2.33  | 27.62±0.22 | 2.75  | 1.346  |
| PHGDH    | 8923   | 29.34±0.21 | 3.97  | 28.37±1.34 | 3.50  | -1.385 |
| PIK3IP1  | 24942  | 28.43±0.18 | 3.88  | 28.10±1.25 | 3.23  | -1.560 |
| PLEKHO2  | 30026  | 28.24±0.16 | 5.43  | 30.07±1.09 | 5.67  | 1.188  |
| PLXNB1   | 9103   | 28.58±0.07 | 2.81  | 27.29±0.84 | 2.42  | -1.306 |
| PMP22    | 9118   | 24.80±0.00 | 2.54  | 27.08±1.36 | 2.22  | -1.247 |
| POSTN    | 16953  | 25.98±0.04 | 2.64  | 27.19±1.37 | 2.32  | -1.241 |
| PPP1R3C  | 9293   | 26.11±0.08 | 2.84  | 27.36±1.42 | 2.96  | 1.093  |
| PSG1     | 9514   | 30.76±0.08 | 0.98  | 26.44±0.08 | 1.57  | 1.510  |
| PSG4     | 9521   | 25.63±0.06 | 1.51  | 26.62±0.13 | 1.75  | 1.185  |
| PTGES    | 9599   | 29.15±0.25 | 4.29  | 29.47±1.25 | 4.60  | 1.243  |
| PTGIS    | 9603   | 33.36±0.22 | 3.59  | 28.10±1.33 | 3.24  | -1.278 |
| PTGS1    | 9604   | 26.83±0.09 | 3.91  | 28.40±1.23 | 3.53  | -1.297 |
| QPCT     | 9753   | 30.93±0.04 | 5.19  | 28.87±1.01 | 4.47  | -1.647 |
| RAB3B    | 9778   | 25.66±0.10 | 5.01  | 29.81±1.11 | 4.94  | -1.050 |
| RPL22L1  | 27610  | 27.24±0.28 | 7.85  | 33.07±0.32 | 8.20  | 1.278  |
| RPL36A   | 135255 | 29.53±0.03 | -5.28 | 19.97±0.04 | -4.43 | 1.798  |
| RPS21    | 10409  | 29.40±0.27 | -4.36 | 20.74±0.12 | -3.66 | 1.619  |
| RPS3     | 10420  | 25.68±0.30 | -2.59 | 21.59±1.01 | -2.81 | -1.171 |
| RSPO3    | 20866  | 37.69±0.29 | 2.05  | 26.49±0.83 | 2.09  | 1.029  |
| SERINC2  | 23231  | 25.18±0.03 | 5.75  | 30.31±1.58 | 5.45  | -1.230 |
| SERPINH1 | 1546   | 29.88±0.05 | -0.46 | 23.70±1.34 | -0.70 | -1.178 |
| SFRP4    | 10778  | 29.72±0.08 | 4.67  | 29.33±0.62 | 4.46  | -1.154 |

|           |       |            |       |            |       |        |
|-----------|-------|------------|-------|------------|-------|--------|
| SGK1      | 10810 | 28.68±0.03 | 0.39  | 24.36±1.25 | -0.04 | -1.344 |
| SH3BGR    | 10822 | 27.14±0.02 | 4.75  | 29.61±0.27 | 4.75  | -1.002 |
| SLC16A3   | 10924 | 29.26±0.11 | 2.31  | 27.13±1.23 | 2.26  | -1.029 |
| SLC2A1    | 11005 | 34.99±0.33 | 4.71  | 29.72±1.40 | 5.32  | 1.526  |
| SMAD7     | 6773  | 28.82±0.01 | 2.85  | 29.46±1.29 | 4.60  | 3.356  |
| SOCS1     | 19383 | 25.01±0.06 | 3.57  | 28.27±0.38 | 3.87  | 1.238  |
| SPON2     | 11253 | 27.86±0.16 | 2.26  | 26.86±1.08 | 1.99  | -1.203 |
| STBD1     | 24854 | 29.90±0.02 | 2.79  | 27.45±0.71 | 3.05  | 1.195  |
| STC2      | 11374 | 28.46±0.12 | 3.72  | 28.16±1.38 | 3.29  | -1.344 |
| STMN2     | 10577 | 29.31±0.12 | 0.25  | 24.61±0.49 | -0.25 | -1.417 |
| SYNPO2    | 17732 | 28.53±0.14 | 8.03  | 32.79±1.15 | 7.92  | -1.075 |
| TBX1      | 11592 | 24.90±0.02 | 9.27  | 34.10±1.24 | 9.24  | -1.023 |
| TFPI2     | 11761 | 30.43±0.01 | -1.29 | 23.89±0.56 | -0.98 | 1.243  |
| TGM2      | 11778 | 26.12±0.03 | 11.01 | 36.78±1.61 | 11.91 | 1.873  |
| THBS1     | 11785 | 32.72±0.13 | -4.48 | 20.45±1.43 | -3.95 | 1.436  |
| THBS2     | 11786 | 32.02±0.16 | 0.58  | 25.54±0.90 | 0.68  | 1.069  |
| TM4SF1    | 11853 | 29.36±0.06 | 0.14  | 26.38±0.05 | 1.51  | 2.591  |
| TNFRSF12A | 18152 | 31.69±0.34 | 0.38  | 25.03±1.05 | 0.63  | 1.192  |
| TOB1      | 11979 | 31.02±0.07 | 0.41  | 25.05±0.31 | 0.65  | 1.181  |
| TSC22D3   | 3051  | 29.44±0.23 | 5.17  | 29.30±1.44 | 4.90  | -1.209 |
| UCHL1     | 12513 | 33.69±0.32 | -1.51 | 23.26±0.57 | -1.14 | 1.292  |
| WISP2     | 12770 | 30.08±0.49 | 8.08  | 33.59±0.27 | 8.73  | 1.566  |
| WNT5B     | 16265 | 36.54±0.66 | 2.75  | 27.58±1.32 | 2.71  | -1.022 |
| XG        | 34022 | 36.48±0.31 | 2.10  | 27.11±0.38 | 2.24  | 1.102  |
| ZNF503    | 23589 | 33.98±0.04 | 0.09  | 25.21±0.30 | 0.35  | 1.195  |

**Abbreviations.** SD, standard deviation.

<sup>a</sup> the  $\Delta C_t$  value was calculated as [ $C_t$  of the selected gene -  $C_t$  of the reference genes].

<sup>b</sup> the Fold Change in the TTD pool in basal condition versus UV-irradiation was calculated as  $2^{-(\Delta C_t \text{ patients} - \Delta C_t \text{ controls})}$  by using the  $2^{-\Delta \Delta C_t}$  method (Livak and Schmittgen, 2001). A Fold Change = 1 indicates no variation in the gene expression between the two pools. Fold Change values > +1 correspond to genes with increased expression whereas Fold Change values < -1 correspond to genes with lowered expression.

**Table S12.** Expression levels of 60 differentially expressed genes selected for additional RealTime PCR analysis

| Gene Symbol    | TTD patients        | Controls            | TTD patients        | Controls            | Significance test<br>TTD vs Controls<br>in basal conditions<br>P(T<=t) two tails | Significance test<br>TTD vs Controls after<br>UV-irradiation<br>P(T<=t) two tails |
|----------------|---------------------|---------------------|---------------------|---------------------|----------------------------------------------------------------------------------|-----------------------------------------------------------------------------------|
|                | NT                  | NT                  | UV                  | UV                  |                                                                                  |                                                                                   |
|                | C <sub>t</sub> Mean | C <sub>t</sub> Mean | C <sub>t</sub> Mean | C <sub>t</sub> Mean |                                                                                  |                                                                                   |
| <i>ADRA2A</i>  | 28.405              | 28.525              | 25.610              | 27.375              | 0.438                                                                            | 0.325                                                                             |
| <i>ALDH1B1</i> | 33.691              | 34.190              | 34.726              | 34.075              | 0.1835                                                                           | 0.3668                                                                            |
| <i>ANGPTL4</i> | 25.076              | 24.271              | 26.419              | 25.337              | 1.435E-11                                                                        | 4.417E-11                                                                         |
| <i>APBB1IP</i> | 30.697              | 29.844              | 34.134              | 33.185              | 0.0291                                                                           | 0.0003                                                                            |
| <i>ATP13A3</i> | 27.187              | 27.050              | 27.853              | 27.578              | 0.232                                                                            | 0.972                                                                             |
| <i>CCRL1</i>   | 26.421              | 25.585              | 25.932              | 25.812              | 0.066                                                                            | 0.204                                                                             |
| <i>c-Fos</i>   | 26.217              | 27.033              | 23.671              | 24.191              | 0.573                                                                            | 0.307                                                                             |
| <i>c-Jun</i>   | 22.991              | 22.827              | 23.962              | 23.276              | 1.838E-05                                                                        | 5.385E-13                                                                         |
| <i>CLGN</i>    | 30.765              | 30.879              | 30.965              | 30.354              | 0.0037                                                                           | 0.0076                                                                            |
| <i>CLU</i>     | 20.500              | 19.650              | 20.688              | 19.797              | 0.0016                                                                           | 0.0007                                                                            |
| <i>CRABP2</i>  | 23.835              | 24.570              | 26.258              | 28.665              | 0.356                                                                            | 0.445                                                                             |
| <i>CSRP2</i>   | 27.549              | 27.234              | 27.446              | 26.790              | 0.004                                                                            | 0.002                                                                             |
| <i>CTGF</i>    | 22.743              | 24.077              | 23.382              | 22.601              | 0.698                                                                            | 0.943                                                                             |
| <i>EGR1</i>    | 20.682              | 20.586              | 20.159              | 19.140              | 8.103E-05                                                                        | 3.192E-13                                                                         |
| <i>EIF4BP1</i> | 23.835              | 24.570              | 26.258              | 28.665              | 0.685                                                                            | 0.963                                                                             |
| <i>FosB</i>    | 23.948              | 23.841              | 23.578              | 23.268              | 0.0002                                                                           | 6.119E-05                                                                         |
| <i>GADD45A</i> | 21.752              | 21.811              | 21.539              | 21.089              | 0.0011                                                                           | 5.223E-10                                                                         |
| <i>GADD45B</i> | 20.861              | 20.925              | 21.171              | 20.378              | 5.734E-06                                                                        | 6.349E-13                                                                         |
| <i>GALNTL2</i> | 27.226              | 28.271              | 28.154              | 29.702              | 0.970                                                                            | 0.866                                                                             |
| <i>GAS5*</i>   | 34.564              | 32.476              | 32.987              | 31.765              | -                                                                                | -                                                                                 |
| <i>GDF15</i>   | 36.876              | 34.657              | 34.976              | 34.475              | 0.1049                                                                           | 0.0032                                                                            |
| <i>GDF6*</i>   | 36.375              | 34.987              | 34.256              | 34.765              | -                                                                                | -                                                                                 |
| <i>GNG11</i>   | 33.564              | 33.765              | 34.867              | 34.543              | 0.5739                                                                           | 0.4987                                                                            |
| <i>GPX3</i>    | 38.765              | 36.556              | 35.445              | 35.987              | 0.0261                                                                           | 0.0796                                                                            |
| <i>HAND2</i>   | 29.742              | 29.521              | 29.575              | 29.272              | 0.7351                                                                           | 0.5951                                                                            |
| <i>HAPLN3</i>  | 23.394              | 23.837              | 27.970              | 29.326              | 0.001                                                                            | 0.566                                                                             |
| <i>HERPUD1</i> | 28.158              | 26.982              | 24.478              | 26.141              | 0.004                                                                            | 0.0016                                                                            |
| <i>HOXB7</i>   | 37.965              | 34.854              | 34.758              | 37.865              | 0.2481                                                                           | 0.0835                                                                            |
| <i>HOXC10</i>  | 26.955              | 26.546              | 27.129              | 30.676              | 0.262                                                                            | 0.118                                                                             |
| <i>HSPA2</i>   | 25.306              | 26.085              | 24.040              | 26.392              | 0.950                                                                            | 0.357                                                                             |
| <i>ID1</i>     | 20.863              | 20.424              | 21.781              | 20.355              | 1.852E-09                                                                        | 1.780E-10                                                                         |
| <i>ID3</i>     | 20.452              | 20.180              | 21.568              | 20.824              | 1.447E-06                                                                        | 1.472E-11                                                                         |
| <i>IER3</i>    | 19.782              | 19.187              | 19.521              | 18.686              | 5.137E-08                                                                        | 1.249E-11                                                                         |
| <i>IL13RA2</i> | 28.158              | 27.371              | 24.478              | 26.141              | 0.951                                                                            | 0.943                                                                             |
| <i>IL20RB</i>  | 26.245              | 23.552              | 26.185              | 23.754              | 5.587E-09                                                                        | 1.397E-09                                                                         |
| <i>JunD</i>    | 27.264              | 27.148              | 26.811              | 26.960              | 4.942E-07                                                                        | 0.00012                                                                           |
| <i>KCNE4*</i>  | 34.865              | 32.543              | 33.234              | 33.874              | -                                                                                | -                                                                                 |
| <i>LBH</i>     | 23.394              | 23.837              | 27.970              | 29.326              | 0.903                                                                            | 0.972                                                                             |
| <i>LRRC15</i>  | 28.484              | 29.785              | 26.786              | 28.273              | 0.122                                                                            | 0.0005                                                                            |
| <i>MT2A</i>    | 25.923              | 25.182              | 29.245              | 29.298              | 0.035                                                                            | 0.972                                                                             |
| <i>PCDH10</i>  | 29.602              | 32.604              | 28.786              | 30.699              | 3.1238E-07                                                                       | 0.0014                                                                            |
| <i>POSTN</i>   | 30.234              | 30.765              | 30.986              | 30.768              | 0.1271                                                                           | 0.3231                                                                            |
| <i>PSG1</i>    | 28.186              | 27.756              | 28.679              | 27.011              | 0.762                                                                            | 0.852                                                                             |
| <i>PSG4</i>    | 25.306              | 26.085              | 24.040              | 26.392              | 0.970                                                                            | 0.943                                                                             |
| <i>PTGIS</i>   | 23.749              | 21.277              | 24.071              | 21.724              | 1.603E-05                                                                        | 7.125E-06                                                                         |
| <i>PTGIS1</i>  | 30.122              | 28.186              | 30.189              | 28.039              | 0.027                                                                            | 0.009                                                                             |
| <i>RPL22L1</i> | 33.654              | 33.678              | 31.879              | 32.865              | 0.7398                                                                           | 0.0041                                                                            |
| <i>RPL36A</i>  | 22.743              | 24.077              | 23.382              | 22.601              | 0.215                                                                            | 0.972                                                                             |
| <i>SFRP4</i>   | 26.869              | 27.176              | 27.134              | 27.424              | 0.316                                                                            | 0.711                                                                             |
| <i>SMAD7</i>   | 18.645              | 19.730              | 22.663              | 24.120              | 0.951                                                                            | 0.943                                                                             |
| <i>SOCS1*</i>  | 29.876              | 29.789              | 29.347              | 28.689              | -                                                                                | -                                                                                 |
| <i>STMN2</i>   | 21.951              | 21.868              | 22.148              | 22.070              | 0.097                                                                            | 0.083                                                                             |
| <i>TBX1</i>    | 28.150              | 28.835              | 32.542              | 28.756              | 2.315E-05                                                                        | 0.0003                                                                            |
| <i>TFPI2</i>   | 23.721              | 23.282              | 22.871              | 23.111              | 0.560                                                                            | 0.963                                                                             |
| <i>TM4SF1</i>  | 27.549              | 27.234              | 27.446              | 26.790              | 0.026                                                                            | 0.0001                                                                            |
| <i>TOB1</i>    | 25.306              | 26.085              | 24.040              | 26.392              | 0.0007                                                                           | 0.114                                                                             |

|                 |        |        |        |        |           |           |
|-----------------|--------|--------|--------|--------|-----------|-----------|
| <i>TSC22D3*</i> | 30.976 | 29.789 | 29.236 | 29.879 | -         | -         |
| <i>WISP2</i>    | 26.653 | 22.131 | 26.552 | 22.390 | 1.042E-08 | 2.404E-08 |
| <i>WNT4</i>     | 30.030 | 28.418 | 29.930 | 28.224 | 4.890E-05 | 6.523E-05 |
| <i>XG*</i>      | 29.965 | 29.689 | 29.543 | 29.795 | -         | -         |

\* The Student-T test was not done because all Ct values were higher than 29.5
